# Supplementary material for: Benzene construction via Pd-catalyzed cyclization of 2,7-alkadiynylic carbonates in the presence of alkynes
Source: Royal Society of Chemistry journal article supplement (doi:10.1039/c8sc04681f), 2018-12-19

## **Benzene Construction via Pd-catalyzed Cyclization of 2,7-Alkadiynylic Carbonates in the Presence of Alkynes**

Yuchen Zhang, Wangteng Wu, Chunling Fu, Xin Huang\* and Shengming Ma\*

Laboratory of Molecular Recognition and Synthesis, Department of Chemistry, Zhejiang University, Hangzhou 310027, Zhejiang, People's Republic of China.

Fax: (+86)21-64167510

E-mail: xinhuangzju@zju.edu.cn; masm@sioc.ac.cn

### **Supporting Information**

|                                                                |          |
|----------------------------------------------------------------|----------|
| General information                                            | S2       |
| Synthesis of new starting materials                            | S3-S6    |
| Synthesis of products <b>5aa/6aa~5la/6la</b> .                 | S7-S29   |
| Control experiments                                            | S30-S38  |
| Deuterium labelling experiments                                | S39-S43  |
| Synthetic applications                                         | S44-S48  |
| References                                                     | S49      |
| Copies of the $^1\text{H}$ NMR and $^{13}\text{C}$ NMR spectra | S50-S140 |

## General Information

$^1\text{H}$  NMR and  $^{13}\text{C}$  NMR spectra were recorded in  $\text{CDCl}_3$  using a Bruker AM 300 MHz NMR spectrometer ( $^1\text{H}$  at 300 MHz,  $^{13}\text{C}$  at 75 MHz). IR spectra were recorded with a Perkin–Elmer 983G instrument. Elemental analyses were measured with a Carlo-Erba EA1110 elementary analysis instrument. Mass spectrometry was performed with an HP 5989A system. High-resolution mass spectrometry was determined with a Finnigan MAT 8430 or Bruker APEXIII instrument.  $\text{Pd}(\text{OAc})_2$  was purchased from *Adamas*. TFP was purchased from *J&K*.  $\text{Na}_2\text{CO}_3$  was bought from *Hongguang Chemical Reagent Co., Ltd.*  $\text{CH}_3\text{CN}$  was refluxed over  $\text{CaH}_2$  and distilled right before use. Unless otherwise indicated, chemicals and solvents were purchased from commercial suppliers. All the temperatures are referred to the oil baths used. 2,7-Alkadiynylic carbonates were prepared according to our previous literatures.<sup>1,2</sup>

### Synthesis of starting material **3j**.<sup>1</sup> (wwt-2-35)

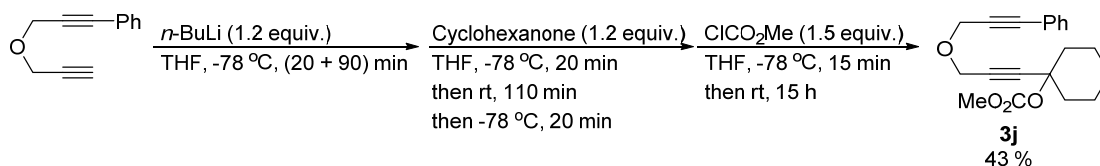

To a solution of 3-(propargyloxy)phenylpropyne (5086.4 mg, 30 mmol) in THF (120 mL) was added dropwise *n*-BuLi (2.5 M in hexane, 14.4 mL, 36 mmol) at -78 °C within 20 minutes. After lithiation for 90 minutes at -78 °C, cyclohexanone (3.7 mL, d = 0.95 g/mL, 3515.0 mg, 36 mmol) was added dropwise with an addition funnel at -78 °C within 20 minutes. The cooling bath was removed and the reaction mixture was warmed up to room temperature and stirred for 110 minutes. Then the mixture was cooled down to -78 °C again for 20 minutes. Methyl chloroformate (3.5 mL, d = 1.22 g/mL, 4270.0 mg, 45 mmol) was added dropwise at -78 °C within 15 minutes. The cooling bath was removed and the reaction mixture was warmed up to room temperature and stirred for 15 h. After the reaction was complete as monitored by TLC (eluent: petroleum ether/ethyl acetate = 20/1), it was quenched with a saturated aqueous solution of NH<sub>4</sub>Cl (50 mL). The resulting mixture was extracted with ethyl acetate (30 mL × 3) and the combined organic phase was dried over anhydrous Na<sub>2</sub>SO<sub>4</sub>. After filtration and evaporation of the solvent, the crude residue was purified by chromatography on silica gel (eluent: petroleum ether/ethyl acetate = 50/1 (3570 mL) or 10/1 (1100 mL)) to afford **3j** (4165.2 mg, 43%) as a liquid: <sup>1</sup>H NMR (300 MHz, CDCl<sub>3</sub>) δ 7.50-7.39 (m, 2 H, ArH), 7.35-7.27 (m, 3 H, ArH), 4.49 (s, 2 H, OCH<sub>2</sub>), 4.40 (s, 2 H, OCH<sub>2</sub>), 3.76 (s, 3 H, OCH<sub>3</sub>), 2.24-2.10 (m, 2 H, CH<sub>2</sub>), 1.95-1.80 (m, 2 H, CH<sub>2</sub>), 1.75-1.46 (m, 5 H, CH<sub>2</sub> × 2 and one proton of CH<sub>2</sub>), 1.41-1.23 (m, 1 H,

one proton of CH<sub>2</sub>); <sup>13</sup>C NMR (75 MHz, CDCl<sub>3</sub>) δ 153.3, 131.8, 128.5, 128.3, 122.5, 86.6, 86.3, 84.3, 81.9, 77.6, 57.1, 56.8, 54.3, 36.8, 24.9, 22.6; IR (neat) ν (cm<sup>-1</sup>) 2938, 2859, 2236, 2197, 1752, 1490, 1441, 1349, 1274, 1247, 1217, 1181, 1130, 1082, 1016; MS (EI): *m/z* (%) 326 (M<sup>+</sup>, 1.79), 115 (100); HRMS calcd. for C<sub>20</sub>H<sub>22</sub>O<sub>4</sub> [M<sup>+</sup>]: 326.1518; Found: 326.1521.

### Synthesis of starting material **3l**.<sup>1</sup> (zyc-3-26)

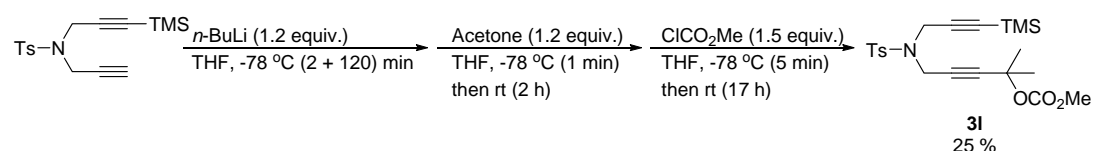

To a solution of *N*-(prop-2-ynyl)-*N*-(3-(trimethylsilyl)prop-2-ynyl)-*p*-tolylsulfonamide (1596.2 mg, 5 mmol) in THF (12 mL) was added dropwise *n*-BuLi (2.5 M in hexane, 2.4 mL, 6 mmol) at -78 °C within 2 minutes. After lithiation for 120 minutes at -78 °C, acetone (0.45 mL, d = 0.788 g/mL, 354.6 mg, 6.1 mmol) was added dropwise with an addition funnel at -78 °C within 1 minutes. The cooling bath was removed and the reaction mixture was warmed up to room temperature and stirred for 2 hours. Then methyl chloroformate (0.58 mL, d = 1.22 g/mL, 707.6 mg, 7.5 mmol) was added dropwise at -78 °C within 5 minutes. The cooling bath was removed and the reaction mixture was warmed up to room temperature and stirred for 17 h. After the reaction was complete as monitored by TLC (eluent: petroleum ether/ethyl acetate = 20/1), it was quenched with a saturated aqueous solution of NH<sub>4</sub>Cl (10 mL). The resulting mixture was extracted with ethyl acetate (10 mL × 3) and the combined organic phase was dried over anhydrous Na<sub>2</sub>SO<sub>4</sub>. After filtration and evaporation of



the solvent, the crude residue was purified by chromatography on silica gel (eluent: petroleum ether/ethyl acetate/diethyl ether = 20/1/1) to afford **3l** (560.2 mg, purity = 96%, 25%) as a liquid:  $^1\text{H}$  NMR (300 MHz,  $\text{CDCl}_3$ )  $\delta$  7.70 (d,  $J$  = 8.4 Hz, 2 H, ArH), 7.30 (d,  $J$  = 8.1 Hz, 2 H, ArH), 4.18 (s, 4 H,  $\text{OCH}_2 \times 2$ ), 3.73 (s, 3 H,  $\text{OCH}_3$ ), 2.42 (s, 3 H,  $\text{CH}_3$ ), 1.53 (s, 6 H,  $\text{CH}_3 \times 2$ ), 0.05 (s, 9 H,  $\text{CH}_3 \times 3$ );  $^{13}\text{C}$  NMR (75 MHz,  $\text{CDCl}_3$ )  $\delta$  153.2, 143.6, 135.0, 129.4, 127.7, 97.4, 90.7, 86.0, 77.1, 73.5, 54.1, 37.0, 36.3, 28.3, 21.3, -0.6; IR (neat)  $\nu$  ( $\text{cm}^{-1}$ ) 2990, 2958, 2900, 2180, 1755, 1598, 1495, 1441, 1354, 1278, 1194, 1165, 1138, 1096, 1045, 1003; MS (EI):  $m/z$  (%) 435 ( $\text{M}^+$ , 3.89), 73 (100); HRMS calcd. for  $\text{C}_{21}\text{H}_{29}\text{NO}_5\text{SSi}$  [ $\text{M}^+$ ]: 435.1536; Found: 435.1539.

#### Synthesis of starting material **4f**.<sup>3</sup> (zyc-1-124)

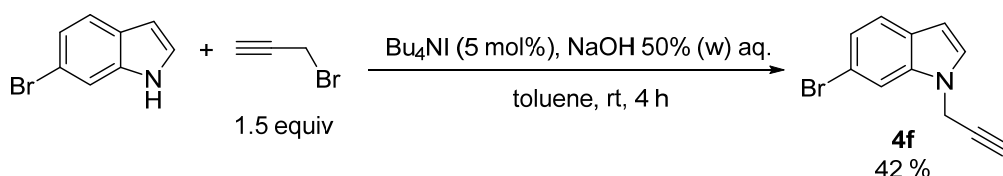

To a dry flask were added 6-bromoindole (1000.8 mg, 5 mmol)/toluene (4 mL), propargyl bromide (0.6 mL,  $d = 1.52$  g/mL, 912.0 mg, 7.7 mmol)/toluene (6 mL),  $\text{Bu}_4\text{NI}$  (92.9 mg, 0.25 mmol), and an aqueous solution of NaOH (2492.4 mg in 2.5 mL of  $\text{H}_2\text{O}$ ) sequentially. The reaction was complete after being stirred at room temperature for 4 hours as monitored by TLC. The resulting mixture was transferred to a separation funnel. Water (5 mL) and ethyl acetate (10 mL) were then added. After the separation of the organic phase, the aqueous phase was extracted with ethyl acetate (10 mL  $\times$  2). The combined organic phase was washed with brine (10 mL) and dried over anhydrous  $\text{Na}_2\text{SO}_4$ . After filtration and evaporation of the solvent, the

residue was purified by column chromatography on silica gel (eluent: petroleum ether (60-90 °C)/ethyl acetate = 150/1) to afford impure **4f** (985.6 mg), which was further purified by recrystallization (*n*-hexane/DCM) to afford pure **4f** (493.9 mg, 42%) as a solid: m.p. 51.8-52.7 °C (*n*-hexane/DCM); <sup>1</sup>H NMR (300 MHz, CDCl<sub>3</sub>) δ 7.54 (t, *J* = 0.9 Hz, 1 H, ArH), 7.46 (dd, *J*<sub>1</sub> = 8.3 Hz, *J*<sub>2</sub> = 0.5 Hz, 1 H, ArH), 7.22 (dd, *J*<sub>1</sub> = 8.4 Hz, *J*<sub>2</sub> = 1.5 Hz, 1 H, ArH), 7.14 (d, *J* = 3.3 Hz, 1 H, ArH), 6.48 (dd, *J*<sub>1</sub> = 3.3 Hz, *J*<sub>2</sub> = 0.9 Hz, 1 H, ArH), 4.77 (d, *J* = 2.4 Hz, 2 H, NCH<sub>2</sub>), 2.40 (t, *J* = 2.6 Hz, 1 H, ≡CH); <sup>13</sup>C NMR (75 MHz, CDCl<sub>3</sub>) δ 136.5, 127.9, 127.7, 123.1, 122.3, 115.5, 112.4, 102.3, 77.1, 73.9, 35.8; IR (KBr) ν (cm<sup>-1</sup>) 3270, 3123, 3102, 2932, 2117, 1869, 1724, 1700, 1695, 1685, 1601, 1560, 1504, 1462, 1425, 1418, 1391, 1343, 1334, 1317, 1308, 1247, 1191, 1100, 1057, 1042; MS (EI): *m/z* (%) 235 (M(<sup>81</sup>Br)<sup>+</sup>, 32.16), 233 (M(<sup>79</sup>Br)<sup>+</sup>, 31.09), 154 (100); Anal. Calcd. for C<sub>11</sub>H<sub>8</sub>BrN (%): C 56.44, H 3.44, N 5.98, Found: C 56.28, H 3.47, N 5.98.

## Synthesis of products **5aa/6aa**~**5ia/6ia**.

1. Synthesis of *N*-((7-phenyl-4-(propen-2-yl)-1,3-dihydroisobenzofuran-5-yl)methyl)-4-methylbenzenesulfonamide (**5aa**). (wwt-1-193)

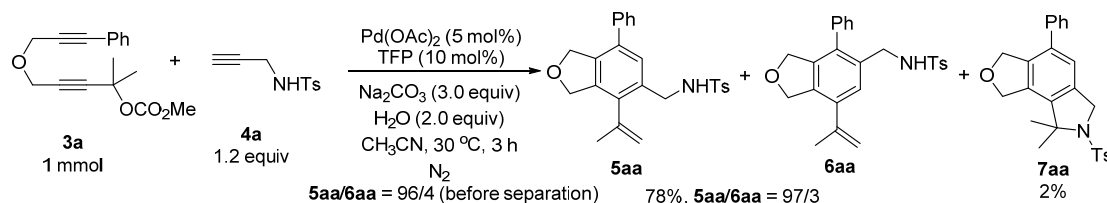

**Typical Procedure I:** To a flame-dried Schlenk tube containing  $\text{Na}_2\text{CO}_3$  (318.6 mg, 3.0 mmol) were added  $\text{Pd}(\text{OAc})_2$  (11.1 mg, 0.05 mmol), TFP (23.3 mg, 0.1 mmol), **4a** (250.9 mg, 1.2 mmol)/ $\text{CH}_3\text{CN}$  (2.0 mL), **3a** (286.7 mg, 1.0 mmol)/ $\text{CH}_3\text{CN}$  (6.0 mL), and  $\text{H}_2\text{O}$  (35.6 mg, 2.0 mmol)/ $\text{CH}_3\text{CN}$  (2.0 mL) sequentially under nitrogen atmosphere. The reaction was complete after being stirred at 30 °C for 3 hours as monitored by TLC. The resulting mixture was filtrated through a short column of silica gel and eluted with ethyl acetate (30 mL  $\times$  3). After evaporation, the crude residue (**5aa/6aa** = 96/4 as determined by  $^1\text{H}$  NMR analysis of the crude product using mesitylene (46  $\mu\text{L}$ ) as the internal standard) was purified by chromatography on silica gel (eluent: petroleum ether (60-90 °C)/ethyl acetate = 5/1 (360 mL) to petroleum ether (60-90 °C)/ethyl acetate/DCM = 4/1/1 (600 mL)) to afford **7aa** (6.7 mg, 2%) and **5aa/6aa** (326.7 mg, 78%, **5aa/6aa** = 97/3 as determined by  $^1\text{H}$  NMR analysis of the isolated product).

**5aa/6aa** (97/3): solid;  $^1\text{H}$  NMR (300 MHz,  $\text{CDCl}_3$ )  $\delta$  7.73 (d,  $J$  = 8.1 Hz, 2 H, ArH), 7.48-7.30 (m, 3 H, ArH), 7.30-7.20 (m, 4 H, ArH), 7.15 (s, 1 H, ArH), 5.26-5.09 (m, 3 H, one proton of  $=\text{CH}_2$  and  $\text{OCH}_2$ ), 5.08-4.87 (m, 3 H,  $\text{OCH}_2$  and NH), 4.85-4.77 (m, 1 H, one proton of  $=\text{CH}_2$ ), 4.15 (d,  $J$  = 6.0 Hz, 2 H,  $\text{NCH}_2$ ), 2.39

(s, 3 H, CH<sub>3</sub>), 1.89 (s, 3 H, CH<sub>3</sub>); <sup>13</sup>C NMR (75 MHz, CDCl<sub>3</sub>) δ 143.4, 141.9, 139.3, 138.3, 136.8, 136.7, 136.0, 134.7, 132.9, 129.6, 128.6, 128.5, 127.6, 127.5, 127.1, 116.6, 73.7, 72.9, 44.3, 23.4, 21.4; IR (KBr) ν (cm<sup>-1</sup>) 3277, 3061, 2916, 2856, 1598, 1477, 1446, 1327, 1290, 1159, 1093, 1058; MS (EI): *m/z* (%) 419 (M<sup>+</sup>, 0.09), 264 ((M-Ts)<sup>+</sup>, 100); Anal. Calcd. for C<sub>25</sub>H<sub>25</sub>NO<sub>3</sub>S (%): C 71.57, H 6.01, N 3.34; Found: C 71.53, H 6.07, N 3.17. The following signals are discernible for **6aa**: <sup>1</sup>H NMR (300 MHz, CDCl<sub>3</sub>) δ 4.77-4.72 (m, 1 H, OCH<sub>2</sub>), 3.98 (d, *J* = 6.3 Hz, 2 H, NCH<sub>2</sub>), 2.06 (s, 3 H, CH<sub>3</sub>).

This mixture may further be purified by recrystallization to afford the pure product **5aa**: m.p. 152.4-154.5 °C (*n*-hexane/DCM).

**7aa**: liquid; <sup>1</sup>H NMR (300 MHz, CDCl<sub>3</sub>) δ 7.83 (d, *J* = 8.4 Hz, 2 H, ArH), 7.49-7.27 (m, 7 H, ArH), 7.10 (s, 1 H, ArH), 5.19 (s, 2 H, OCH<sub>2</sub>), 5.11 (s, 2 H, OCH<sub>2</sub>), 4.68 (s, 2 H, NCH<sub>2</sub>), 2.41 (s, 3 H, CH<sub>3</sub>), 1.78 (s, 6 H, CH<sub>3</sub> × 2); <sup>13</sup>C NMR (75 MHz, CDCl<sub>3</sub>) δ 143.2, 139.6, 139.2, 138.1, 137.9, 135.8, 133.8, 133.0, 129.5, 128.7, 127.8, 127.7, 127.4, 121.8, 72.8, 71.2, 70.6, 53.1, 27.1, 21.5; IR (neat) ν (cm<sup>-1</sup>) 2971, 2923, 2854, 1763, 1598, 1495, 1467, 1409, 1339, 1273, 1162, 1149, 1135, 1093, 1058, 1005; MS (EI): *m/z* (%) 419 (M<sup>+</sup>, 0.1), 404 ((M-CH<sub>3</sub>)<sup>+</sup>, 100); HRMS calcd. for C<sub>24</sub>H<sub>22</sub>NO<sub>3</sub>S [(M-CH<sub>3</sub>)<sup>+</sup>]: 404.1320; Found: 404.1321.

#### Gram-scale synthesis of **5aa**. (zyc-1-166)

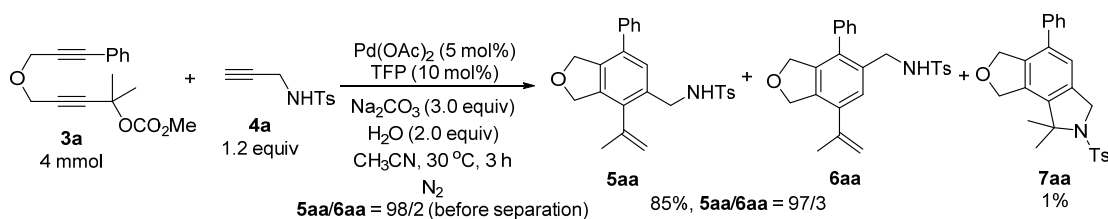

Following **Typical Procedure I**, the reaction of **3a** (1144.6 mg, 4.0 mmol), **4a** (1004.7 mg, 4.8 mmol), Pd(OAc)<sub>2</sub> (44.5 mg, 0.2 mmol), TFP (93.4 mg, 0.4 mmol), Na<sub>2</sub>CO<sub>3</sub> (1272.2 mg, 12.0 mmol), and H<sub>2</sub>O (144.4 mg, 8.0 mmol) in CH<sub>3</sub>CN (40 mL) afforded **7aa** (20.5 mg, 1%) and **5aa/6aa** (1417.3 mg, 85%, **5aa/6aa** = 97/3 as determined by <sup>1</sup>H NMR analysis of the isolated product) (eluent: petroleum ether (60-90 °C)/ethyl acetate/DCM = 10/1/1 (2040 mL) to 5/1/1 (210 mL)) (**5aa/6aa** = 98/2 as determined by <sup>1</sup>H NMR analysis of the crude product using mesitylene (184 μL) as the internal standard).

**5aa/6aa** (97/3): <sup>1</sup>H NMR (300 MHz, CDCl<sub>3</sub>) δ 7.72 (d, *J* = 8.1 Hz, 2 H, ArH), 7.44-7.18 (m, 7 H, ArH), 7.15 (s, 1 H, ArH), 5.25-5.16 (m, 1 H, one proton of =CH<sub>2</sub>), 5.26-5.06 (m, 3 H, one proton of NH and OCH<sub>2</sub>), 5.05-4.95 (m, 2 H, OCH<sub>2</sub>), 4.84-4.76 (m, 1 H, one proton of =CH<sub>2</sub>), 4.15 (d, *J* = 6.0 Hz, 2 H, NCH<sub>2</sub>), 2.37 (s, 3 H, CH<sub>3</sub>), 1.89 (s, 3 H, CH<sub>3</sub>); <sup>13</sup>C NMR (75 MHz, CDCl<sub>3</sub>) δ 143.4, 141.9, 139.3, 138.2, 136.9, 136.6, 136.0, 134.7, 132.9, 129.6, 128.6, 128.4, 127.6, 127.5, 127.1, 116.5, 73.6, 72.9, 44.2, 23.4, 21.4. The following signals are discernible for **6aa**: <sup>1</sup>H NMR (300 MHz, CDCl<sub>3</sub>) δ 4.75-4.72 (m, 1 H, one proton of =CH<sub>2</sub>), 3.97 (d, *J* = 6.0 Hz, 2 H, NCH<sub>2</sub>), 2.04 (s, 3 H, CH<sub>3</sub>).

**7aa**: liquid; <sup>1</sup>H NMR (300 MHz, CDCl<sub>3</sub>) δ 7.83 (d, *J* = 8.1 Hz, 2 H, ArH), 7.47-7.25 (m, 7 H, ArH), 7.10 (s, 1 H, ArH), 5.19 (s, 2 H, OCH<sub>2</sub>), 5.11 (s, 2 H, OCH<sub>2</sub>), 4.68 (s, 2 H, NCH<sub>2</sub>), 2.41 (s, 3 H, CH<sub>3</sub>), 1.78 (s, 6 H, CH<sub>3</sub> × 2); <sup>13</sup>C NMR (75 MHz, CDCl<sub>3</sub>) δ 143.2, 139.6, 139.2, 138.0, 137.8, 135.8, 133.8, 132.9, 129.5, 128.7, 127.8, 127.7, 127.3, 121.8, 72.8, 71.1, 70.6, 53.1, 27.1, 21.5.

The following compounds **5ab/6ab** ~ **5ia/6ia** were prepared according to

### Typical Procedure I.

#### 2. Synthesis of (7-phenyl-4-(propen-2-yl)-1,3-dihydroisobenzofuran-5-yl)methanol

(**5ab**). (wwt-1-189, wwt-2-90)

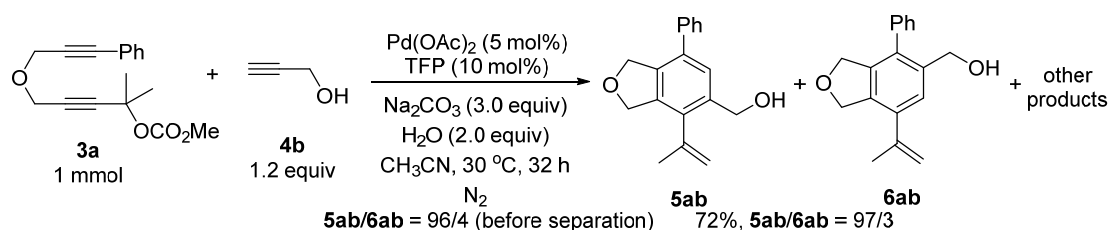

The reaction of  $\text{Na}_2\text{CO}_3$  (316.4 mg, 3.0 mmol),  $\text{Pd}(\text{OAc})_2$  (11.3 mg, 0.05 mmol), TFP (23.1 mg, 0.1 mmol), **4b** (67.3 mg, 1.2 mmol), **3a** (285.4 mg, 1.0 mmol), and  $\text{H}_2\text{O}$  (36.2 mg, 2.0 mmol) in  $\text{CH}_3\text{CN}$  (10 mL) afforded **5ab/6ab** (190.1 mg, 72%, **5ab/6ab** = 97/3 as determined by  $^1\text{H}$  NMR analysis of the isolated product) (eluent: petroleum ether (60-90 °C)/ethyl acetate = 10/1 (330 mL) to 5/1 (480 mL)) (**5ab/6ab** = 96/4 as determined by  $^1\text{H}$  NMR analysis of the crude product using mesitylene (46  $\mu\text{L}$ ) as the internal standard).

**5ab/6ab** (97/3): liquid;  $^1\text{H}$  NMR (300 MHz,  $\text{CDCl}_3$ )  $\delta$  7.48-7.28 (m, 6 H, ArH), 5.29-5.23 (m, 1 H, one proton of  $=\text{CH}_2$ ), 5.20-5.14 (m, 2 H,  $\text{OCH}_2$ ), 5.09-5.02 (m, 2 H,  $\text{OCH}_2$ ), 4.91-4.85 (m, 1 H, one proton of  $=\text{CH}_2$ ), 4.68 (s, 2 H,  $\text{OCH}_2$ ), 2.34 (br s, 1 H, OH), 2.00 (t,  $J$  = 1.2 Hz, 3 H,  $\text{CH}_3$ );  $^{13}\text{C}$  NMR (75 MHz,  $\text{CDCl}_3$ )  $\delta$  142.4, 139.7, 137.9, 137.6, 136.2, 135.5, 134.6, 128.6, 127.7, 127.6, 127.4, 116.0, 73.7, 72.9, 62.4, 23.6; IR (neat)  $\nu$  ( $\text{cm}^{-1}$ ) 3416, 3076, 3029, 2938, 2911, 2855, 1640, 1601, 1474, 1446, 1370, 1329, 1287, 1195, 1136, 1057; GC-MS (GC condition: injector: 280 °C; column:

DB-5, temperature: 60 °C (2 min), 20 °C/min to 280 °C, 280 °C (30 min)) (EI)  $m/z$  (%) for **5ab**:  $T_R$  5.3 min: 266 ( $M^+$ , 100); for **6ab**:  $T_R$  5.2 min: 266 ( $M^+$ , 100); HRMS calcd. for  $C_{18}H_{18}O_2$  [ $M^+$ ]: 266.1307; Found: 266.1306. The following signals are discernible for **6ab**:  $^1H$  NMR (300 MHz,  $CDCl_3$ )  $\delta$  5.23-5.20 (m, 1 H, one proton of  $=CH_2$ ), 5.00-4.97 (m, 2 H,  $OCH_2$ ), 4.84-4.80 (m, 2 H,  $OCH_2$ ), 4.48 (s, 2 H,  $CH_2$ ), 2.14-2.10 (m, 3 H,  $CH_3$ ).

### 3. Synthesis of 1-((7-phenyl-4-(propen-2-yl)-1,3-dihydroisobenzofuran-5-yl)methyl)-1*H*-indole (**5ac**). (wwt-2-123, zyc-1-68)

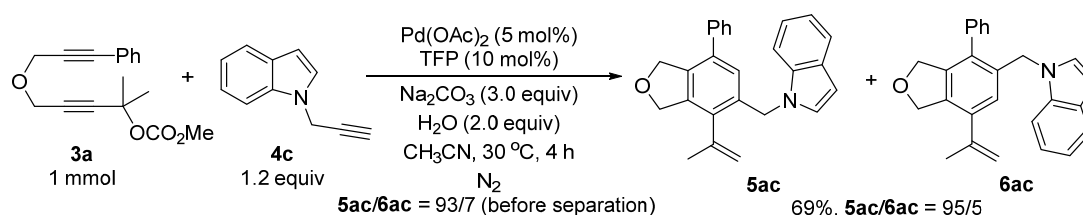

The reaction of  $Na_2CO_3$  (317.6 mg, 3 mmol),  $Pd(OAc)_2$  (11.3 mg, 0.05 mmol), TFP (23.1 mg, 0.1 mmol), **4c** (185.4 mg, 1.2 mmol), **3a** (285.4 mg, 1.0 mmol), and  $H_2O$  (36.2 mg, 2 mmol) in  $CH_3CN$  (10 mL) afforded **5ac/6ac** (252.9 mg, 69%, **5ac/6ac** = 95/5 as determined by  $^1H$  NMR analysis of the isolated product) (eluent: petroleum ether (60-90 °C)/ethyl acetate = 40/1) (**5ac/6ac** = 93/7 as determined by  $^1H$  NMR analysis of the crude product using mesitylene (46  $\mu L$ ) as the internal standard).

**5ac/6ac** (95/5): solid;  $^1H$  NMR (300 MHz,  $CDCl_3$ )  $\delta$  7.66-7.57 (m, 1 H, ArH), 7.47-7.00 (m, 9 H, ArH), 6.93 (s, 1 H, ArH), 6.52-6.46 (m, 1 H, ArH), 5.34-5.26 (m, 3 H, one proton of  $=CH_2$  and  $NCH_2$ ), 5.21-5.15 (m, 2 H,  $OCH_2$ ), 5.11-5.05 (m, 2 H,  $OCH_2$ ), 4.99-4.93 (m, 1 H, one proton of  $=CH_2$ ), 1.88 (s, 3 H,  $CH_3$ );  $^{13}C$  NMR (75

MHz, CDCl<sub>3</sub>)  $\delta$  142.1, 139.4, 138.4, 136.6, 136.3, 135.8, 134.7, 133.9, 128.6, 128.0, 127.6, 127.4, 127.3, 121.5, 120.9, 119.4, 116.3, 109.5, 101.7, 73.7, 72.9, 47.2, 23.1; GC-MS (GC condition: injector: 280 °C; column: DB-5, temperature: 60 °C (2 min), 20 °C/min to 280 °C, 280 °C (30 min)) (EI)  $m/z$  (%) for **5ac**: T<sub>R</sub> 6.8 min: 365 (M<sup>+</sup>, 71.0), 350 (100); for **6ac**: T<sub>R</sub> 7.5 min: 365 (M<sup>+</sup>, 31.1), 350 (100); HRMS calcd. for C<sub>26</sub>H<sub>23</sub>NO [M<sup>+</sup>]: 365.1780, Found: 365.1784. The following signals are discernible for **6ac**: <sup>1</sup>H NMR (300 MHz, CDCl<sub>3</sub>)  $\delta$  6.46-6.42 (m, 1 H, ArH), 5.46-5.38 (m, 3 H, one proton of =CH<sub>2</sub> and NCH<sub>2</sub>), 5.13 (s, 2 H, OCH<sub>2</sub>).

This mixture may further be purified by recrystallization to afford the pure product **5ac**: m.p. 121.5-123.3 °C (*n*-hexane/DCM).

#### 4. Synthesis of 5-methyl-1-((7-phenyl-4-(propen-2-yl)-1,3-dihydroisobenzofuran-5-yl)methyl)-1*H*-indole (**5ad**). (zyc-1-102)

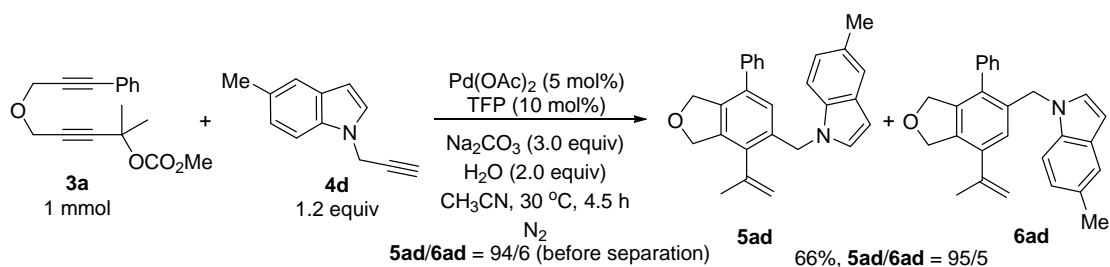

The reaction of Na<sub>2</sub>CO<sub>3</sub> (317.9 mg, 3.0 mmol), Pd(OAc)<sub>2</sub> (11.8 mg, 0.05 mmol), TFP (24.1 mg, 0.1 mmol), **4d** (203.5 mg, 1.2 mmol), **3a** (285.7 mg, 1.0 mmol), and H<sub>2</sub>O (37.5 mg, 2.1 mmol) in CH<sub>3</sub>CN (10 mL) afforded **5ad/6ad** (249.9 mg, 66%, **5ad/6ad** = 95/5 as determined by <sup>1</sup>H NMR analysis of the isolated product) (eluent: petroleum ether (60-90 °C)/ethyl acetate = 30/1) (**5ad/6ad** = 94/6 as determined by <sup>1</sup>H NMR analysis of the crude product using mesitylene (46  $\mu$ L) as the internal standard).



**5ad/6ad** (95/5): solid;  $^1\text{H}$  NMR (300 MHz,  $\text{CDCl}_3$ )  $\delta$  7.46-7.10 (m, 7 H, ArH), 7.07-6.88 (m, 3 H, ArH), 6.42 (d,  $J = 3.3$  Hz, 1 H, ArH), 5.37-5.24 (m, 3 H, one proton of  $=\text{CH}_2$  and  $\text{NCH}_2$ ), 5.22-5.16 (m, 2 H,  $\text{OCH}_2$ ), 5.12-5.05 (m, 2 H,  $\text{OCH}_2$ ), 5.01-4.93 (m, 1 H, one proton of  $=\text{CH}_2$ ), 2.42 (s, 3 H,  $\text{CH}_3$ ), 1.89 (s, 3 H,  $\text{CH}_3$ );  $^{13}\text{C}$  NMR (75 MHz,  $\text{CDCl}_3$ )  $\delta$  142.2, 139.5, 138.4, 136.6, 135.8, 134.8, 134.1, 128.9, 128.6, 128.1, 127.7, 127.45, 127.37, 123.2, 120.6, 116.3, 109.2, 101.1, 73.8, 73.0, 47.3, 23.2, 21.3; IR (KBr)  $\nu$  ( $\text{cm}^{-1}$ ) 3073, 3028, 2965, 2909, 2832, 1508, 1485, 1474, 1437, 1390, 1371, 1345, 1333, 1301, 1256, 1227, 1180, 1132, 1059, 1029; MS (EI):  $m/z$  (%) 379 ( $\text{M}^+$ , 77.0), 364 ( $(\text{M}-\text{CH}_3)^+$ , 100.0); HRMS calcd. for  $\text{C}_{27}\text{H}_{25}\text{NO}$  [ $\text{M}^+$ ]: 379.1936, Found: 379.1937. The following signals are discernible for **6ad**:  $^1\text{H}$  NMR (300 MHz,  $\text{CDCl}_3$ )  $\delta$  6.36 (s, 1 H, ArH), 5.44-5.41 (m, 3 H,  $\text{NCH}_2$  and one proton of  $=\text{CH}_2$ ), 2.45 (s, 3 H,  $\text{CH}_3$ ).

This mixture may further be purified by recrystallization to afford the pure product **5ad**: m.p. 119.6-122.8  $^\circ\text{C}$  (DCM).

## 5. Synthesis of 1-((7-phenyl-4-(propen-2-yl)-1,3-dihydroisobenzofuran-5-yl)methyl)-1*H*-indole-3-carbaldehyde (**5ae**). (zyc-1-79)

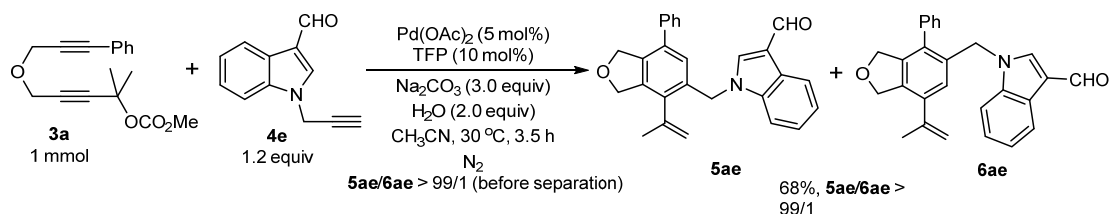

The reaction of  $\text{Na}_2\text{CO}_3$  (318.8 mg, 3.0 mmol),  $\text{Pd}(\text{OAc})_2$  (11.5 mg, 0.05 mmol), TFP (24.2 mg, 0.1 mmol), **4e** (220.2 mg, 1.2 mmol), **3a** (285.9 mg, 1.0 mmol), and

H<sub>2</sub>O (37.0 mg, 2.0 mmol) in CH<sub>3</sub>CN (10 mL) afforded **5ae** (268.9 mg, 68%, **5ae/6ae** > 99/1 as determined by <sup>1</sup>H NMR analysis of the isolated product) (eluent: petroleum ether (60-90 °C)/ethyl acetate = 10/1 (880 mL) to 5/1 (1000 mL)) (**5ae/6ae** > 99/1 as determined by <sup>1</sup>H NMR analysis of the crude product using mesitylene (46 μL) as the internal standard).

**5ae**: solid; m.p. 158.8-160.4 °C (*n*-hexane/DCM); <sup>1</sup>H NMR (300 MHz, CDCl<sub>3</sub>) δ 9.97 (s, 1 H, CHO), 8.35-8.26 (m, 1 H, ArH), 7.64 (s, 1 H, ArH), 7.45-7.22 (m, 8 H, ArH), 7.07 (s, 1 H, ArH), 5.38 (s, 2 H, NCH<sub>2</sub>), 5.34-5.28 (m, 1 H, one proton of =CH<sub>2</sub>), 5.25-5.19 (m, 2 H, OCH<sub>2</sub>), 5.13-5.06 (m, 2 H, OCH<sub>2</sub>), 4.98-4.91 (m, 1 H, one proton of =CH<sub>2</sub>), 1.87 (s, 3 H, CH<sub>3</sub>); <sup>13</sup>C NMR (75 MHz, CDCl<sub>3</sub>) δ 184.5, 141.7, 139.00, 138.96, 138.3, 137.7, 137.4, 136.2, 135.1, 131.6, 128.7, 127.9, 127.7, 127.6, 125.3, 124.0, 123.0, 122.0, 118.4, 116.7, 110.2, 73.7, 72.9, 48.0, 23.1; IR (KBr) ν (cm<sup>-1</sup>) 3111, 3080, 3059, 3019, 2962, 2938, 2911, 2836, 1659, 1615, 1577, 1531, 1466, 1435, 1406, 1388, 1352, 1259, 1157, 1136, 1057, 1046, 1013; MS (EI): *m/z* (%) 393 (M<sup>+</sup>, 100.0); HRMS calcd. for C<sub>27</sub>H<sub>23</sub>NO<sub>2</sub> [M<sup>+</sup>]: 393.1729, Found: 393.1728.

## 6. Synthesis of 6-bromo-1-((7-phenyl-4-(propen-2-yl)-1,3-dihydroisobenzofuran-5-yl)methyl)-1*H*-indole (**5af**). (zyc-1-130)

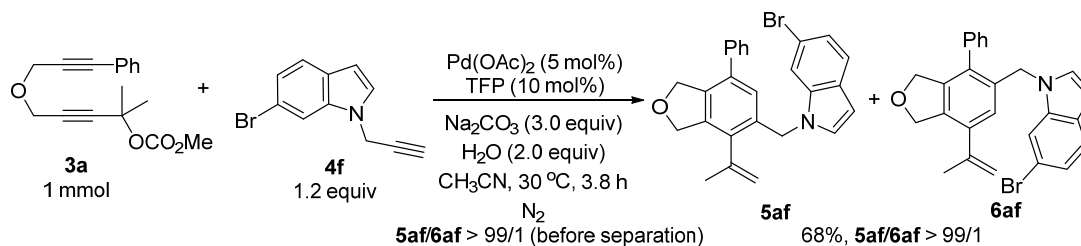

The reaction of Na<sub>2</sub>CO<sub>3</sub> (317.5 mg, 3.0 mmol), Pd(OAc)<sub>2</sub> (11.6 mg, 0.05 mmol),

TFP (23.9 mg, 0.1 mmol), **4f** (281.7 mg, 1.2 mmol), **3a** (286.0 mg, 1.0 mmol), and H<sub>2</sub>O (37.2 mg, 2.0 mmol) in CH<sub>3</sub>CN (10 mL) afforded **5af** (304.3 mg, 68%, **5af/6af** > 99/1 as determined by <sup>1</sup>H NMR analysis of the isolated product) (The crude product was purified by column chromatography on silica gel (petroleum ether (60-90 °C)/ethyl acetate = 40/1) to afford impure **5af** (365.9 mg), which was further purified with chromatography (petroleum ether (60-90 °C)/DCM = 1/1)) (**5af/6af** > 99/1 as determined by <sup>1</sup>H NMR analysis of the crude product using mesitylene (46 µL) as the internal standard).

**5af**: solid; m.p. 120.6-122.7 °C (DCM); <sup>1</sup>H NMR (300 MHz, CDCl<sub>3</sub>) δ 7.55-7.43 (m, 2 H, ArH), 7.42-7.22 (m, 5 H, ArH), 7.19 (dd, *J*<sub>1</sub> = 8.4 Hz, *J*<sub>2</sub> = 1.8 Hz, 1 H, ArH), 7.03 (d, *J* = 3.3 Hz, 1 H, ArH), 6.91 (s, 1 H, ArH), 6.48 (d, *J* = 3.3 Hz, 1 H, ArH), 5.36-5.31 (m, 1 H, one proton of =CH<sub>2</sub>), 5.28 (s, 2 H, NCH<sub>2</sub>), 5.24-5.17 (m, 2 H, OCH<sub>2</sub>), 5.14-5.06 (m, 2 H, OCH<sub>2</sub>), 5.02-4.95 (m, 1 H, one proton of =CH<sub>2</sub>), 1.88 (s, 3 H, CH<sub>3</sub>); <sup>13</sup>C NMR (75 MHz, CDCl<sub>3</sub>) δ 142.0, 139.4, 138.6, 137.1, 136.9, 135.8, 134.9, 133.4, 128.7, 128.6, 127.7, 127.5, 127.4, 127.3, 122.8, 122.1, 116.5, 115.2, 112.6, 102.0, 73.7, 73.0, 47.3, 23.2; IR (KBr) ν (cm<sup>-1</sup>) 3072, 3025, 2964, 2938, 2898, 2854, 1637, 1602, 1561, 1504, 1461, 1439, 1391, 1366, 1332, 1319, 1241, 1205, 1187, 1130, 1094, 1057, 1043, 1031; MS (EI): *m/z* (%) 443 (M(<sup>81</sup>Br)<sup>+</sup>, 79.0), 445 (M(<sup>79</sup>Br)<sup>+</sup>, 80.5), 428 (100); Anal. Calcd. for C<sub>26</sub>H<sub>22</sub>BrNO (%): C 70.28, H 4.99, N 3.15; Found: C 69.98, H 5.12, N 2.95.

## 7. Synthesis of N-((4-(cyclopentenyl)-7-phenyl-1,3-dihydroisobenzofuran-5-yl)meth-

yl)-4-methylbenzenesulfonamide (**5ba**). (wwt-2-130)

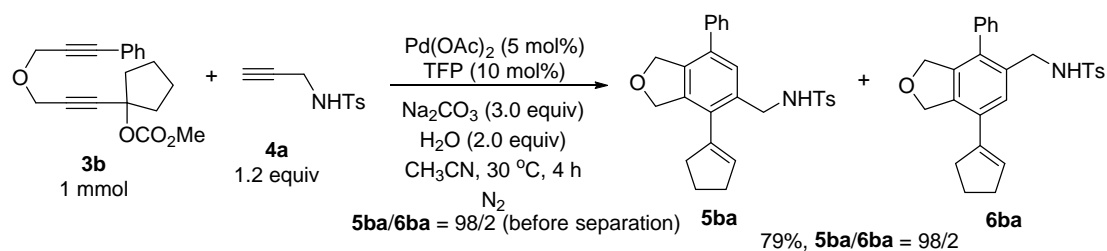

The reaction of  $\text{Na}_2\text{CO}_3$  (318.2 mg, 3.0 mmol),  $\text{Pd}(\text{OAc})_2$  (11.3 mg, 0.05 mmol), TFP (23.4 mg, 0.1 mmol), **4a** (251.1 mg, 1.2 mmol), **3b** (311.7 mg, 1.0 mmol), and  $\text{H}_2\text{O}$  (36.0 mg, 2.0 mmol) in  $\text{CH}_3\text{CN}$  (10 mL) afforded **5ba/6ba** (351.0 mg, 79%, **5ba/6ba** = 98/2 as determined by  $^1\text{H}$  NMR analysis of the isolated product) (The crude product was purified by column chromatography on silica gel to afford a part of pure **5ba/6ba** (petroleum ether (60-90 °C)/ethyl acetate = 8/1 (450 mL) to 6/1 (490 mL)) and impure **5ba/6ba** (determined by TLC). The impure part was further purified by column chromatography on silica gel (petroleum ether (60-90 °C)/ethyl acetate = 8/1) to afford another part of pure **5ba/6ba** (**5ba/6ba** = 98/2 as determined by  $^1\text{H}$  NMR analysis of the crude product using mesitylene (46  $\mu\text{L}$ ) as the internal standard).

**5ba/6ba** (98/2): solid;  $^1\text{H}$  NMR (300 MHz,  $\text{CDCl}_3$ )  $\delta$  7.71 (d,  $J$  = 8.4 Hz, 2 H, ArH), 7.42-7.27 (m, 3 H, ArH), 7.27-7.17 (m, 4 H, ArH), 7.15 (s, 1 H, ArH), 5.60-5.50 (m, 1 H, =CH), 5.29 (br s, 1 H, NH), 5.15-5.02 (m, 2 H,  $\text{OCH}_2$ ), 5.02-4.85 (m, 2 H,  $\text{OCH}_2$ ), 4.10 (d,  $J$  = 6.0 Hz, 2 H,  $\text{NCH}_2$ ), 2.50-2.28 (m, 7 H,  $\text{CH}_2 \times 2$  and  $\text{CH}_3$ ), 2.00-1.70 (m, 2 H,  $\text{CH}_2$ );  $^{13}\text{C}$  NMR (75 MHz,  $\text{CDCl}_3$ )  $\delta$  143.1, 139.5, 139.1, 138.7, 136.6, 136.0, 134.2, 133.6, 131.5, 131.0, 129.3, 128.4, 127.4, 127.2, 126.8, 73.3, 73.0, 44.4, 36.2, 32.9, 23.6, 21.2; IR (neat)  $\nu$  ( $\text{cm}^{-1}$ ) 3274, 3059, 3027, 2949, 2920, 2847, 1599, 1495, 1474, 1446, 1328, 1266, 1161, 1094, 1055; MS (EI):  $m/z$  (%)

290 ((M-Ts)<sup>+</sup>, 100); Anal. Calcd. for C<sub>27</sub>H<sub>27</sub>NO<sub>3</sub>S (%): C 72.78, H 6.11, N 3.14; Found: C 72.58, H 6.31, N 3.06. The following signals are discernible for **6ba**: <sup>1</sup>H NMR (300 MHz, CDCl<sub>3</sub>) δ 7.52 (d, *J* = 8.4 Hz, 2 H, ArH), 4.75-4.70 (m, 2 H, OCH<sub>2</sub>), 3.95 (d, *J* = 6.3 Hz, 2 H, CH<sub>2</sub>).

This mixture may further be purified by recrystallization to afford the pure product **5ba**: m.p. 123.4-125.3 °C (*n*-hexane/DCM).

#### 8. Synthesis of *N*-((4-(cyclohexenyl)-7-phenyl-1,3-dihydroisobenzofuran-5-yl)methyl)-4-methylbenzenesulfonamide (**5ja**). (zyc-3-38)

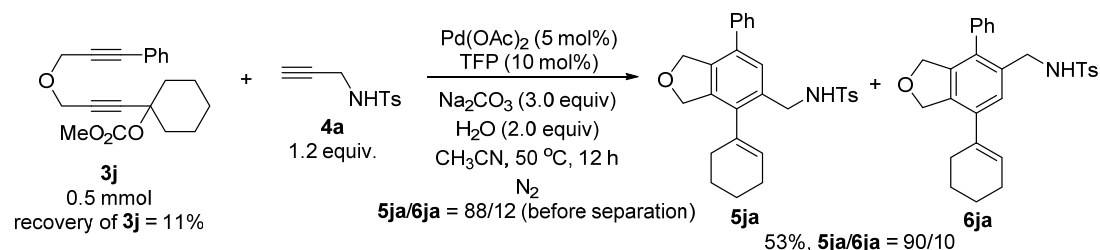

The reaction of Na<sub>2</sub>CO<sub>3</sub> (159.0 mg, 1.5 mmol), Pd(OAc)<sub>2</sub> (5.6 mg, 0.025 mmol), TFP (11.6 mg, 0.05 mmol), **4a** (125.7 mg, 0.6 mmol), **3j** (163.4 mg, 0.5 mmol), and H<sub>2</sub>O (18.1 mg, 1.0 mmol) in CH<sub>3</sub>CN (5 mL) afforded **5ja/6ja** (121.1 mg, 53%, **5ja/6ja** = 90/10 as determined by <sup>1</sup>H NMR analysis of the isolated product) (eluent: petroleum ether (60-90 °C)/ethyl acetate = 10/1 (1100 mL) to 5/1 (480 mL)) (**5ja/6ja** = 88/12 as determined by <sup>1</sup>H NMR analysis of the crude product using mesitylene (23 μL) as the internal standard, recovery of **3j** = 11%).

**5ja/6ja** (90/10): solid; m.p. 152.2-153.8 °C (*n*-hexane/DCM); <sup>1</sup>H NMR (300 MHz, CDCl<sub>3</sub>) δ 7.74 (d, *J* = 8.1 Hz, 2 H, ArH), 7.44-7.29 (m, 3 H, ArH), 7.26 (d, *J* = 8.1 Hz, 4 H, ArH), 7.14 (s, 1 H, ArH), 5.57-5.44 (m, 1 H, =CH), 5.19-5.16 (m, 2 H,

OCH<sub>2</sub>), 5.03-4.93 (m, 2 H, OCH<sub>2</sub>), 4.88 (t, *J* = 6.0 Hz, 1 H, NH), 4.22-4.01 (m, 2 H, NCH<sub>2</sub>), 2.39 (s, 3 H, CH<sub>3</sub>), 2.13-1.91 (m, 4 H, CH<sub>2</sub> × 2), 1.70-1.50 (m, 4 H, CH<sub>2</sub> × 2); <sup>13</sup>C NMR (75 MHz, CDCl<sub>3</sub>) δ 143.4, 139.4, 138.9, 136.8, 136.7, 136.6, 135.1, 134.4, 133.3, 129.6, 128.6, 128.5, 127.6, 127.5, 127.4, 127.1, 73.7, 72.9, 44.4, 29.3, 25.1, 22.6, 21.7, 21.4; IR (neat) ν (cm<sup>-1</sup>) 3277, 2927, 2856, 1599, 1475, 1447, 1436, 1328, 1162, 1094, 1054; MS (EI): *m/z* (%) 459 (M<sup>+</sup>, 0.69), 304 ((M-Ts)<sup>+</sup>, 100); HRMS calcd. for C<sub>28</sub>H<sub>29</sub>NO<sub>3</sub>S [M<sup>+</sup>]: 459.1868; Found: 459.1862. The following signals are discernible for **6ja**: <sup>1</sup>H NMR (300 MHz, CDCl<sub>3</sub>) δ 7.53 (d, *J* = 8.4 Hz, 2 H, ArH), 7.17 (d, *J* = 8.4 Hz, 2 H, ArH), 5.74-5.66 (m, 1 H, =CH), 4.75-4.70 (m, 2 H, OCH<sub>2</sub>), 4.66 (t, *J* = 6.0 Hz, 1 H, NH), 4.97 (d, *J* = 6.3 Hz, 2 H, NCH<sub>2</sub>), 2.15-2.25 (m, 4 H, CH<sub>2</sub> × 2), 1.82-1.77 (m, 4 H, CH<sub>2</sub> × 2).

## 9. Synthesis of (4-(propen-2-yl)-7-(p-tolyl)-1,3-dihydroisobenzofuran-5-yl)methanol (**5cb**). (cfsy-zy-138, wwt-2-23)

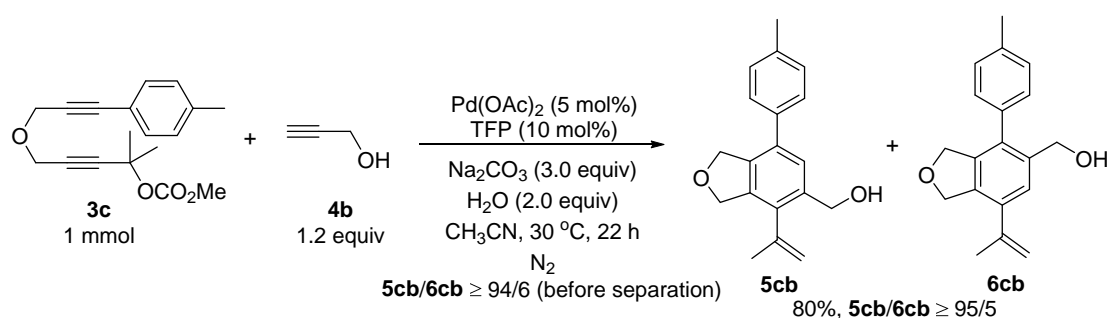

The reaction of Na<sub>2</sub>CO<sub>3</sub> (317.5 mg, 3.0 mmol), Pd(OAc)<sub>2</sub> (11.3 mg, 0.05 mmol), TFP (23.4 mg, 0.1 mmol), **4b** (66.8 mg, 1.2 mmol), **3c** (300.7 mg, 1.0 mmol), and H<sub>2</sub>O (36.0 μL, d = 1.0 g/mL, 2.0 mmol) in CH<sub>3</sub>CN (10 mL) afforded **5cb** (224.5 mg, 80%, **5cb**/**6cb** ≥ 95/5 as determined by <sup>1</sup>H NMR analysis of the isolated product)

(eluent: petroleum ether (60-90 °C)/ethyl acetate = 20/1 (525 mL) to 5/1 (480 mL))

(**5cb**/**6cb**  $\geq$  94/6 as determined by  $^1\text{H}$  NMR analysis of the crude product using mesitylene (46  $\mu\text{L}$ ) as the internal standard).

**5cb**: liquid;  $^1\text{H}$  NMR (400 MHz,  $\text{CDCl}_3$ )  $\delta$  7.42 (s, 1 H, ArH), 7.27 (d,  $J$  = 8.0 Hz, 2 H, ArH), 7.21 (d,  $J$  = 8.0 Hz, 2 H, ArH), 5.29-5.23 (m, 1 H, one proton of  $=\text{CH}_2$ ), 5.21-5.14 (m, 2 H,  $\text{OCH}_2$ ), 5.08-5.01 (m, 2 H,  $\text{OCH}_2$ ), 4.91-4.85 (m, 1 H, one proton of  $=\text{CH}_2$ ), 4.68 (s, 2 H,  $\text{OCH}_2$ ), 2.38 (s, 3 H,  $\text{CH}_3$ ), 2.23 (br s, 1 H, OH), 2.01 (s, 3 H,  $\text{CH}_3$ );  $^{13}\text{C}$  NMR (100 MHz,  $\text{CDCl}_3$ )  $\delta$  142.5, 137.9, 137.5, 137.2, 136.8, 136.2, 135.3, 134.6, 129.3, 127.6, 115.9, 73.8, 72.9, 62.5, 23.7, 21.1; IR (neat)  $\nu$  ( $\text{cm}^{-1}$ ) 3412, 3076, 3024, 2915, 2858, 1640, 1518, 1477, 1444, 1370, 1330, 1286, 1136, 1057; MS (EI):  $m/z$  (%) 280 ( $\text{M}^+$ , 100); HRMS calcd. for  $\text{C}_{19}\text{H}_{20}\text{O}_2$  [ $\text{M}^+$ ]: 280.1463; Found: 280.1465. The following signals are discernible for **6cb**:  $^1\text{H}$  NMR (400 MHz,  $\text{CDCl}_3$ )  $\delta$  7.10 (d,  $J$  = 8.0 Hz, 2 H, ArH), 5.01-4.98 (m, 1 H, one proton of  $=\text{CH}_2$ ), 4.85-4.82 (m, 2 H,  $\text{OCH}_2$ ), 4.49 (s, 2 H,  $\text{OCH}_2$ ), 2.13 (s, 3 H,  $\text{CH}_3$ ).

#### 10. Synthesis of 1-((4-(cyclopentenyl)-7-(o-tolyl)-1,3-dihydroisobenzofuran-5-yl)methyl)-1*H*-indole-3-carbaldehyde (**5de**). (zyc-1-94)

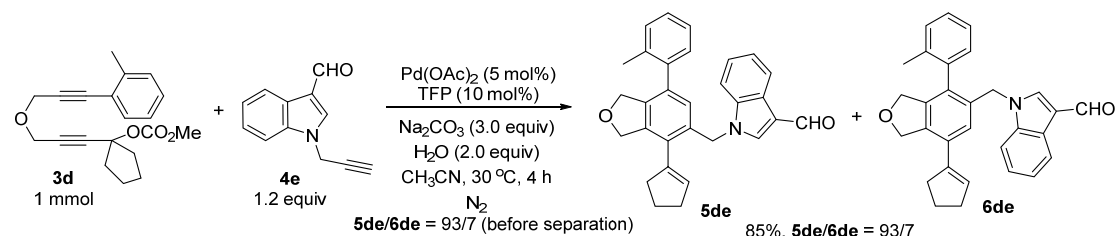

The reaction of **3d** (324.4 mg, 1.0 mmol), **4e** (219.8 mg, 1.2 mmol),  $\text{Pd}(\text{OAc})_2$  (11.1 mg, 0.05 mmol), TFP (23.7 mg, 0.1 mmol),  $\text{Na}_2\text{CO}_3$  (317.8 mg, 3.0 mmol), and

H<sub>2</sub>O (37.1 mg, 2.1 mmol) in CH<sub>3</sub>CN (10 mL) afforded **5de/6de** (366.7 mg, 85%, **5de/6de** = 93/7 as determined by <sup>1</sup>H NMR analysis of the isolated product) (eluent: petroleum ether (60-90 °C)/ethyl acetate = 10/1 (550 mL) to 5/1 (720 mL)) (**5de/6de** = 93/7 as determined by <sup>1</sup>H NMR analysis of the crude product using mesitylene (46 μL) as the internal standard).

**5de/6de** (93/7): solid; <sup>1</sup>H NMR (300 MHz, CDCl<sub>3</sub>) δ 9.93 (s, 1 H, CHO), 8.36-8.15 (m, 1 H, ArH), 7.59 (s, 1 H, ArH), 7.40-6.95 (m, 7 H, ArH), 6.84 (s, 1 H, ArH), 5.72-5.58 (m, 1 H, =CH), 5.33 (s, 2 H, NCH<sub>2</sub>), 5.14-5.01 (m, 2 H, OCH<sub>2</sub>), 4.97-4.85 (m, 2 H, OCH<sub>2</sub>), 2.52-2.25 (m, 4 H, CH<sub>2</sub> × 2), 2.00 (s, 3 H, CH<sub>3</sub>), 1.96-1.79 (m, 2 H, CH<sub>2</sub>); <sup>13</sup>C NMR (75 MHz, CDCl<sub>3</sub>) δ 184.5, 139.6, 139.1, 138.6, 138.3, 137.3, 135.2, 134.7, 131.9, 131.7, 131.2, 130.3, 128.8, 128.6, 127.8, 125.7, 125.3, 123.9, 122.9, 122.0, 118.3, 110.2, 73.5, 73.4, 48.5, 36.1, 33.2, 23.6, 19.8; IR (KBr) ν (cm<sup>-1</sup>) 3045, 2951, 2925, 2846, 1655, 1617, 1577, 1560, 1530, 1466, 1401, 1387, 1362, 1332, 1164, 1134, 1081, 1051, 1040; MS (EI): *m/z* (%) 433 (M<sup>+</sup>, 100.0); Anal. Calcd. for C<sub>30</sub>H<sub>27</sub>NO<sub>2</sub> (%): C 83.11, H 6.28, N 3.23; Found: C 82.74, H 6.43, N 2.99. The following signals are discernible for **6de**: <sup>1</sup>H NMR (300 MHz, CDCl<sub>3</sub>) δ 10.37 (s, 1 H, CHO), 8.64-8.55 (m, 1 H, ArH), 2.72-2.51 (m, 4 H, CH<sub>2</sub> × 2).

This mixture may further be purified by recrystallization to afford the pure product **5de**: m.p. 84.0-87.0 °C (DCM).

11. Synthesis of *N*-((7-(4-methoxyphenyl)-4-(propen-2-yl)-1,3-dihydroisobenzofuran-5-yl)methyl)-4-methylbenzenesulfonamide (**5ea**). (zyc-1-101)



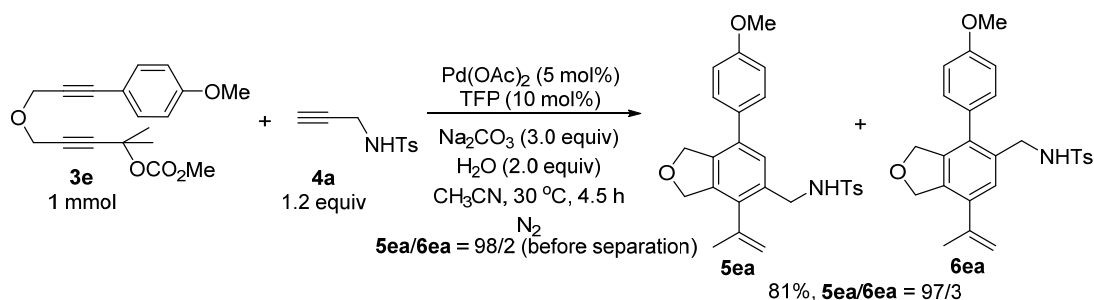

The reaction of **3e** (315.7 mg, 1.0 mmol), **4a** (252.2 mg, 1.2 mmol),  $\text{Pd}(\text{OAc})_2$  (11.4 mg, 0.05 mmol), TFP (23.9 mg, 0.1 mmol),  $\text{Na}_2\text{CO}_3$  (318.4 mg, 3.0 mmol), and  $\text{H}_2\text{O}$  (37.0 mg, 2.0 mmol) in  $\text{CH}_3\text{CN}$  (10 mL) afforded **5ea/6ea** (364.0 mg, 81%, **5ea/6ea** = 97/3 as determined by  $^1\text{H}$  NMR analysis of the isolated product) (eluent: petroleum ether (60-90 °C)/ethyl acetate = 5/1 (360 mL) to 3/1 (600 mL)) (**5ea/6ea** = 98/2 as determined by  $^1\text{H}$  NMR analysis of the crude product using mesitylene (46  $\mu\text{L}$ ) as the internal standard).

**5ea/6ea** (97/3): solid;  $^1\text{H}$  NMR (300 MHz,  $\text{CDCl}_3$ )  $\delta$  7.73 (d,  $J$  = 8.4 Hz, 2 H, ArH), 7.24 (d,  $J$  = 7.8 Hz, 2 H, ArH), 7.19 (d,  $J$  = 9.0 Hz, 2 H, ArH), 7.14 (s, 1 H, ArH), 6.91 (d,  $J$  = 9.0 Hz, 2 H, ArH), 5.24-5.14 (m, 2 H, one proton of  $=\text{CH}_2$  and NH), 5.14-5.09 (m, 2 H,  $\text{OCH}_2$ ), 5.01-4.94 (m, 2 H,  $\text{OCH}_2$ ), 4.83-4.75 (m, 1 H, one proton of  $=\text{CH}_2$ ), 4.13 (d,  $J$  = 5.7 Hz, 2 H,  $\text{NCH}_2$ ), 3.83 (s, 3 H,  $\text{CH}_3$ ), 2.38 (s, 3 H,  $\text{CH}_3$ ), 1.87 (s, 3 H,  $\text{CH}_3$ );  $^{13}\text{C}$  NMR (75 MHz,  $\text{CDCl}_3$ )  $\delta$  159.1, 143.3, 142.0, 138.1, 136.9, 136.3, 135.5, 134.3, 132.8, 131.7, 129.5, 128.7, 128.1, 127.1, 116.5, 114.0, 73.7, 72.8, 55.2, 44.2, 23.4, 21.4; IR (KBr)  $\nu$  ( $\text{cm}^{-1}$ ) 3265, 3005, 2963, 2927, 2895, 2834, 1654, 1643, 1610, 1519, 1482, 1450, 1438, 1412, 1348, 1325, 1290, 1251, 1211, 1179, 1159, 1117, 1093, 1054, 1036; MS (EI):  $m/z$  (%) 449 ( $\text{M}^+$ , 0.2), 294 ( $(\text{M}-\text{Ts})^+$ , 100.0); Anal. Calcd. for  $\text{C}_{26}\text{H}_{27}\text{NO}_4\text{S}$  (%): C 69.46, H 6.05, N 3.12; Found: C 69.46, H 6.14, N 2.86.

The following signals are discernible for **6ea**:  $^1\text{H}$  NMR (300 MHz,  $\text{CDCl}_3$ )  $\delta$  7.54 (d,  $J = 8.1$  Hz, 2 H, ArH), 4.93-4.91 (m, 2 H,  $\text{OCH}_2$ ), 3.98 (d,  $J = 6.0$  Hz, 2 H,  $\text{NCH}_2$ ), 2.04 (s, 3 H,  $\text{CH}_3$ ).

This mixture may further be purified by recrystallization to afford the pure product **5ea**: m.p. 152.4-154.1  $^\circ\text{C}$  (*n*-hexane/DCM).

## 12. Synthesis of 1-((7-(4-chlorophenyl)-4-(propen-2-yl)-1,3-dihydroisobenzofuran-5-yl)methyl)-5-methoxy-1*H*-indole (**5fg**). (zyc-1-87)

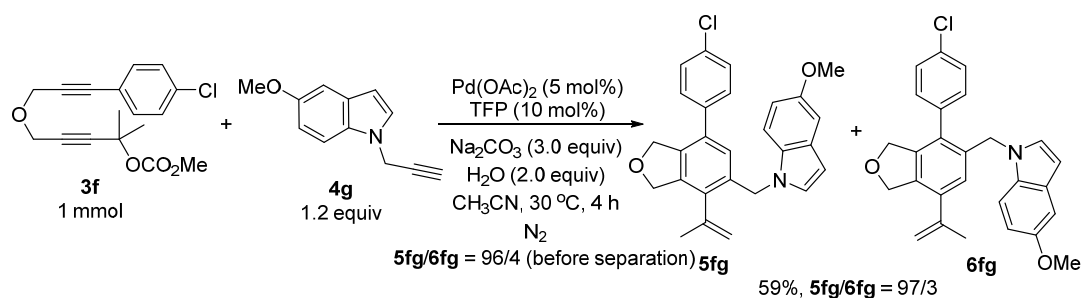

The reaction of  $\text{Na}_2\text{CO}_3$  (318.2 mg, 3.0 mmol),  $\text{Pd}(\text{OAc})_2$  (11.5 mg, 0.05 mmol), TFP (24.8 mg, 0.1 mmol), **4g** (223.7 mg, 1.2 mmol), **3f** (320.8 mg, 1.0 mmol), and  $\text{H}_2\text{O}$  (36.8 mg, 2.0 mmol) in  $\text{CH}_3\text{CN}$  (10 mL) afforded **5fg/6fg** (252.3 mg, 59%, **5fg/6fg** = 97/3 as determined by  $^1\text{H}$  NMR analysis of the isolated product) (The crude product was purified by column chromatography on silica gel (petroleum ether (60-90  $^\circ\text{C}$ )/ethyl acetate = 20/1) to afford impure **5fg/6fg** (281.1 mg), which was further purified with chromatography (petroleum ether (60-90  $^\circ\text{C}$ )/ethyl acetate = 40/1 (1000 mL) to 20/1 (700 mL)) (**5fg/6fg** = 96/4 as determined by  $^1\text{H}$  NMR analysis of the crude product using mesitylene (46  $\mu\text{L}$ ) as the internal standard).

**5fg/6fg** (97/3): solid;  $^1\text{H}$  NMR (300 MHz,  $\text{CDCl}_3$ )  $\delta$  7.31 (d,  $J = 8.4$  Hz, 2 H,

ArH), 7.18-7.10 (m, 3 H, ArH), 7.08 (d,  $J = 2.4$  Hz, 1 H, ArH), 7.04 (d,  $J = 3.0$  Hz, 1 H, ArH), 6.87-6.77 (m, 2 H, ArH), 6.44 (dd,  $J_1 = 3.3$  Hz,  $J_2 = 0.6$  Hz, 1 H, ArH), 5.36-5.31 (m, 1 H, one proton of =CH<sub>2</sub>), 5.29 (s, 2 H, NCH<sub>2</sub>), 5.18-5.12 (m, 2 H, OCH<sub>2</sub>), 5.12-5.06 (m, 2 H, OCH<sub>2</sub>), 5.01-4.93 (m, 1 H, one proton of =CH<sub>2</sub>), 3.83 (s, 3 H, OCH<sub>3</sub>), 1.91 (s, 3 H, CH<sub>3</sub>); <sup>13</sup>C NMR (75 MHz, CDCl<sub>3</sub>)  $\delta$  154.0, 142.0, 138.6, 137.9, 136.6, 136.0, 134.3, 133.58, 133.56, 131.6, 129.0, 128.9, 128.8, 128.6, 127.0, 116.4, 112.0, 110.3, 102.5, 101.3, 73.6, 73.0, 55.7, 47.4, 23.1; IR (KBr)  $\nu$  (cm<sup>-1</sup>) 3101, 2986, 2964, 2903, 2830, 1619, 1577, 1487, 1449, 1385, 1366, 1342, 1295, 1255, 1239, 1187, 1150, 1131, 1092, 1054, 1026, 1014; MS (EI):  $m/z$  (%) 431 (M(<sup>37</sup>Cl)<sup>+</sup>, 25.2), 429 (M(<sup>35</sup>Cl)<sup>+</sup>, 69.1), 414 (100.0); HRMS calcd. for C<sub>27</sub>H<sub>24</sub><sup>35</sup>ClNO<sub>2</sub> [M<sup>+</sup>]: 429.1496, Found: 429.1493. The following signals are discernible for **6fg**: <sup>1</sup>H NMR (300 MHz, CDCl<sub>3</sub>)  $\delta$  6.38 (dd,  $J_1 = 3.2$  Hz,  $J_2 = 0.8$  Hz, 1 H, ArH), 5.22-5.18 (m, 2 H, OCH<sub>2</sub>), 5.06-5.04 (m, 2 H, OCH<sub>2</sub>), 4.93-4.91 (m, 1 H, one proton of =CH<sub>2</sub>), 3.86 (s, 3 H, OCH<sub>3</sub>), 1.97 (s, 3 H, CH<sub>3</sub>).

This mixture may further be purified by recrystallization to afford the pure product **5fg**: m.p. 146.2-147.7 °C (*n*-hexane/DCM).

13. Synthesis of *N*-((4-(propen-2-yl)-7-(thiophen-3-yl)-1,3-dihydroisobenzofuran-5-yl)methyl)-4-methylbenzenesulfonamide (**5ga**). (zyc-1-131)

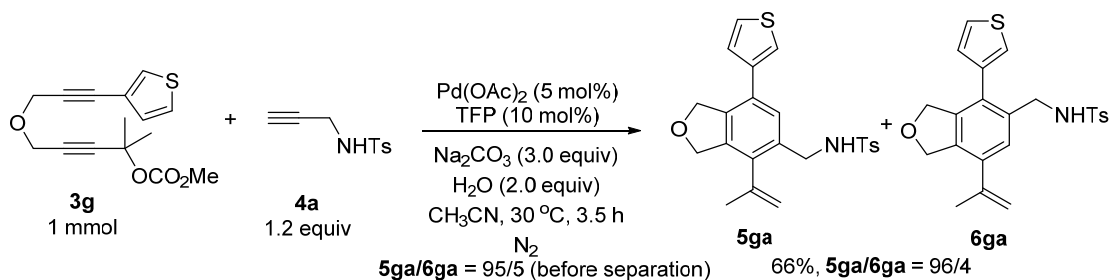

The reaction of  $\text{Na}_2\text{CO}_3$  (318.2 mg, 3.0 mmol),  $\text{Pd(OAc)}_2$  (11.4 mg, 0.05 mmol), TFP (24.1 mg, 0.1 mmol), **4a** (251.5 mg, 1.2 mmol), **3g** (292.1 mg, 1.0 mmol), and  $\text{H}_2\text{O}$  (37.0 mg, 2.0 mmol) in  $\text{CH}_3\text{CN}$  (10 mL) afforded **5ga/6ga** (281.8 mg, 66%, **5ga/6ga** = 96/4 as determined by  $^1\text{H}$  NMR analysis of the isolated product) (The crude product was purified by column chromatography on silica gel (petroleum ether (60-90  $^\circ\text{C}$ )/ethyl acetate = 5/1 (500 mL) to 3/1 (300 mL)) to afford impure **5ga/6ga** (356.6 mg), which was further purified by recrystallization (*n*-hexane/DCM)) (**5ga/6ga** = 95/5 as determined by  $^1\text{H}$  NMR analysis of the crude product using mesitylene (46  $\mu\text{L}$ ) as the internal standard).

**5ga/6ga** (96/4): solid; m.p. 146.2-148.3  $^\circ\text{C}$  (*n*-hexane/DCM);  $^1\text{H}$  NMR (300 MHz,  $\text{CDCl}_3$ )  $\delta$  7.73 (d,  $J$  = 8.4 Hz, 2 H, ArH), 7.35 (t,  $J$  = 3.9 Hz, 1 H, ArH), 7.26 (d,  $J$  = 3.6 Hz, 2 H, ArH), 7.23 (s, 1 H, ArH), 7.13 (d,  $J$  = 4.2 Hz, 2 H, ArH), 5.29 (t,  $J$  = 5.9 Hz, 1 H, NH), 5.22-5.10 (m, 3 H, one proton of  $=\text{CH}_2$  and  $\text{OCH}_2$ ), 5.03-4.93 (m, 2 H,  $\text{OCH}_2$ ), 4.82-4.73 (m, 1 H, one proton of  $=\text{CH}_2$ ), 4.12 (d,  $J$  = 5.7 Hz, 2 H,  $\text{CH}_2$ ), 2.39 (s, 3 H,  $\text{CH}_3$ ), 1.86 (s, 3 H,  $\text{CH}_3$ );  $^{13}\text{C}$  NMR (75 MHz,  $\text{CDCl}_3$ )  $\delta$  143.4, 141.8, 139.7, 138.2, 136.7, 135.9, 135.7, 132.8, 129.6, 129.0, 127.5, 127.0, 126.7, 126.1, 121.9, 116.5, 74.1, 72.9, 44.1, 23.4, 21.4; IR (KBr)  $\nu$  ( $\text{cm}^{-1}$ ) 3315, 3193, 2963, 2942, 2918, 2854, 1642, 1598, 1495, 1438, 1370, 1325, 1213, 1187, 1162, 1124, 1096, 1057, 1027; MS (EI):  $m/z$  (%) 425 ( $\text{M}^+$ , 0.07), 270 ( $(\text{M-Ts})^+$ , 100.0); Anal. Calcd. for

C<sub>23</sub>H<sub>23</sub>NO<sub>3</sub>S<sub>2</sub> (%): C 64.92, H 5.45, N 3.29, Found: C 64.57, H 5.49, N 3.21. The following signals are discernible for **6ga**: <sup>1</sup>H NMR (300 MHz, CDCl<sub>3</sub>) δ 7.59 (d, *J* = 8.1 Hz, 2 H, ArH), 7.05-7.00 (m, 1 H, ArH), 6.88-6.83 (m, 1 H, ArH), 4.93-4.90 (m, 2 H, OCH<sub>2</sub>), 4.02 (d, *J* = 5.7 Hz, 2 H, NCH<sub>2</sub>), 2.03 (s, 3 H, CH<sub>3</sub>).

14. Synthesis of *N*-((7-butyl-4-(propen-2-yl)-1,3-dihydroisobenzofuran-5-yl)methyl)-4-methylbenzenesulfonamide (**5ka**). (zyc-3-32)

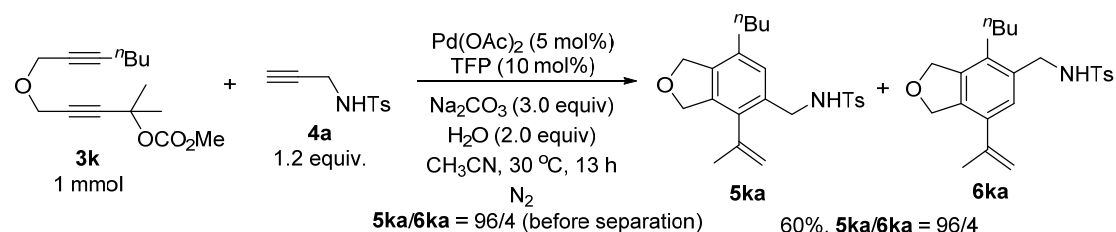

The reaction of Na<sub>2</sub>CO<sub>3</sub> (318.0 mg, 3.0 mmol), Pd(OAc)<sub>2</sub> (11.2 mg, 0.05 mmol), TFP (23.3 mg, 0.1 mmol), **4a** (251.3 mg, 1.2 mmol), **3k** (266.2 mg, 1.0 mmol), and H<sub>2</sub>O (36.1 mg, 2.0 mmol) in CH<sub>3</sub>CN (10 mL) afforded **5ka/6ka** (238.8 mg, 60%, **5ka/6ka** = 96/4 as determined by <sup>1</sup>H NMR analysis of the isolated product) (eluent: petroleum ether (60-90 °C)/ethyl acetate = 10/1) (**5ka/6ka** = 96/4 as determined by <sup>1</sup>H NMR analysis of the crude product using mesitylene (46 µL) as the internal standard).

**5ka/6ka** (96/4): liquid; <sup>1</sup>H NMR (300 MHz, CDCl<sub>3</sub>) δ 7.73 (d, *J* = 8.4 Hz, 2 H, ArH), 7.27 (d, *J* = 7.8 Hz, 2 H, ArH), 6.92 (s, 1 H, ArH), 5.37 (t, *J* = 5.3 Hz, 1 H, NH), 5.19-5.08 (m, 1 H, one proton of =CH<sub>2</sub>), 5.08-4.96 (m, 2 H, OCH<sub>2</sub>), 4.96-4.86 (m, 2 H, OCH<sub>2</sub>), 4.75-4.65 (m, 1 H, one proton of =CH<sub>2</sub>), 4.06 (d, *J* = 6.0 Hz, 2 H, NCH<sub>2</sub>), 2.42 (s, 3 H, CH<sub>3</sub>), 2.37 (t, *J* = 7.8 Hz, 2 H, CH<sub>2</sub>), 1.82 (s, 3 H, CH<sub>3</sub>), 1.55-1.38 (m, 2 H, CH<sub>2</sub>), 1.38-1.21 (m, 2 H, CH<sub>2</sub>), 0.90 (t, *J* = 7.2 Hz, 3 H, CH<sub>3</sub>); <sup>13</sup>C NMR (75 MHz,

CDCl<sub>3</sub>)  $\delta$  143.1, 142.0, 137.0, 136.81, 136.76, 134.9, 134.3, 132.2, 129.4, 128.2, 127.0, 116.1, 73.0, 72.8, 44.0, 32.6, 31.9, 23.4, 22.4, 21.3, 13.7; IR (neat)  $\nu$  (cm<sup>-1</sup>) 3277, 2956, 2930, 2859, 1639, 1598, 1444, 1329, 1161, 1094, 1056; MS (EI):  $m/z$  (%) 399 (M<sup>+</sup>, 0.04), 244 ((M-Ts)<sup>+</sup>, 100); HRMS calcd. for C<sub>23</sub>H<sub>29</sub>NO<sub>3</sub>S [M<sup>+</sup>]: 399.1868; Found: 399.1864. The following signals are discernible for **6ka**: <sup>1</sup>H NMR (300 MHz, CDCl<sub>3</sub>)  $\delta$  7.00 (s, 1 H, ArH), 4.85-4.80 (m, 1 H, one proton of =CH<sub>2</sub>), 1.98 (s, 3 H, CH<sub>3</sub>).

15. Synthesis of (4-(propen-2-yl)-2-tosyl-7-(trimethylsilyl)isoindolin-5-yl)methanol (**5lb**). (zyc-3-33)

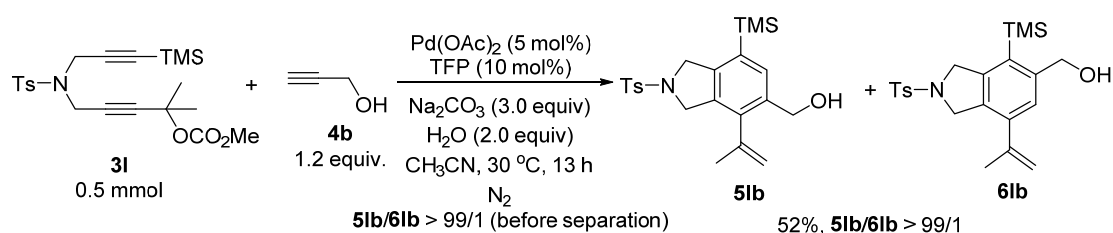

The reaction of Na<sub>2</sub>CO<sub>3</sub> (158.9 mg, 1.5 mmol), Pd(OAc)<sub>2</sub> (5.5 mg, 0.025 mmol), TFP (11.6 mg, 0.05 mmol), **4b** (33.7 mg, 0.6 mmol), **3l** (227.1 mg, 0.5 mmol), and H<sub>2</sub>O (18.1 mg, 1.0 mmol) in CH<sub>3</sub>CN (5 mL) afforded **5lb/6lb** (108.7 mg, 52%, **5lb/6lb** > 99/1 as determined by <sup>1</sup>H NMR analysis of the isolated product) (eluent: petroleum ether (60-90 °C)/ethyl acetate = 10/1 (1000 mL) to 5/1 (600 mL)) (**5lb/6lb** > 99/1 as determined by <sup>1</sup>H NMR analysis of the crude product using mesitylene (23  $\mu$ L) as the internal standard).

**5lb**: solid; m.p. 112.9-114.2 °C (*n*-hexane/DCM); <sup>1</sup>H NMR (300 MHz, CDCl<sub>3</sub>)  $\delta$  7.75 (d, *J* = 8.1 Hz, 2 H, ArH), 7.44 (s, 1 H, ArH), 7.32 (d, *J* = 7.8 Hz, 2 H, ArH),

5.31-5.21 (m, 1 H, one proton of =CH<sub>2</sub>), 4.83-4.76 (m, 1 H, one proton of =CH<sub>2</sub>), 4.71-4.63 (m, 2 H, NCH<sub>2</sub>), 4.63-4.54 (m, 2 H, NCH<sub>2</sub>), 4.49 (s, 2 H, OCH<sub>2</sub>), 2.40 (s, 3 H, CH<sub>3</sub>), 1.96 (s, 4 H, OH and CH<sub>3</sub>), 0.27 (s, 9 H, CH<sub>3</sub> × 3); <sup>13</sup>C NMR (75 MHz, CDCl<sub>3</sub>) δ 143.7, 142.1, 140.6, 138.7, 136.0, 133.7, 133.3, 133.1, 129.8, 127.4, 116.1, 62.5, 54.4, 52.4, 23.6, 21.4, -1.0; IR (neat) ν (cm<sup>-1</sup>) 3527, 2954, 2908, 2856, 1637, 1597, 1383, 1347, 1251, 1163, 1098, 1066; MS (EI): *m/z* (%) 415 (M<sup>+</sup>, 18.08), 91 (100); HRMS calcd. for C<sub>22</sub>H<sub>29</sub>NO<sub>3</sub>SSi [M<sup>+</sup>]: 415.1637; Found: 415.1635.

16. Synthesis of *N*-((7-phenyl-4-(propen-2-yl)-1-propyl-1,3-dihydroisobenzofuran-5-yl)methyl)-4-methylbenzenesulfonamide (**5ha**). (zyc-1-71, wwt-2-132)

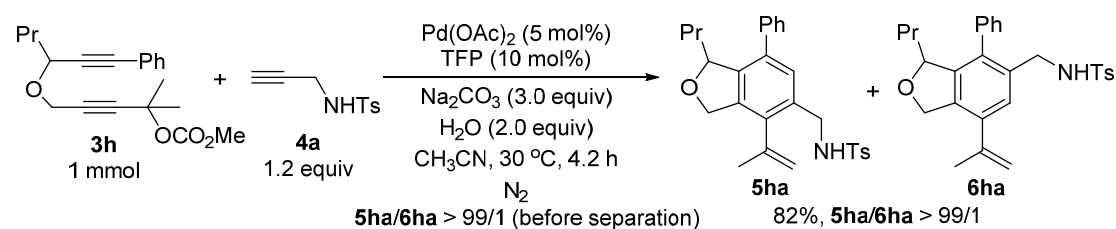

The reaction of **3h** (329.1 mg, 1.0 mmol), **4a** (251.5 mg, 1.2 mmol), Pd(OAc)<sub>2</sub> (11.2 mg, 0.05 mmol), TFP (23.8 mg, 0.1 mmol), Na<sub>2</sub>CO<sub>3</sub> (318.7 mg, 3.0 mmol), and H<sub>2</sub>O (35.8 mg, 2.0 mmol) in CH<sub>3</sub>CN (10 mL) afforded **5ha** (378.7 mg, 82%, **5ha/6ha** > 99/1 as determined by <sup>1</sup>H NMR analysis of the isolated product) (eluent: petroleum ether (60-90 °C)/ethyl acetate = 10/1 (500 mL) to 5/1 (500 mL)) (**5ha/6ha** > 99/1 as determined by <sup>1</sup>H NMR analysis of the crude product using mesitylene (46 μL) as the internal standard).

**5ha**: solid; m.p. 127.4-130.2 °C (*n*-hexane/DCM); <sup>1</sup>H NMR (300 MHz, CDCl<sub>3</sub>) δ 7.73 (d, *J* = 8.1 Hz, 2 H, ArH), 7.44-7.33 (m, 3 H, ArH), 7.28-7.20 (m, 4 H, ArH),

7.02 (s, 1 H, ArH), 5.66-5.56 (m, 1 H, OCH), 5.23-5.16 (m, 1 H, one proton of =CH<sub>2</sub>), 5.04-4.92 (m, 2 H, OCH<sub>2</sub>), 4.86-4.78 (m, 1 H, one proton of =CH<sub>2</sub>), 4.75 (t, *J* = 6.0 Hz, 1 H, NH), 4.15 (d, *J* = 6.3 Hz, 2 H, NCH<sub>2</sub>), 2.39 (s, 3 H, CH<sub>3</sub>), 1.91 (s, 3 H, CH<sub>3</sub>), 1.33-1.02 (m, 4 H, CH<sub>2</sub> × 2), 0.67 (t, *J* = 7.1 Hz, 3 H, CH<sub>3</sub>); <sup>13</sup>C NMR (75 MHz, CDCl<sub>3</sub>) δ 143.3, 141.9, 139.4, 139.2, 138.2, 136.8, 135.9, 135.4, 132.6, 129.5, 129.3, 128.4, 128.0, 127.4, 127.1, 116.5, 84.0, 71.6, 44.2, 35.9, 23.4, 21.4, 18.1, 13.6; IR (neat) ν (cm<sup>-1</sup>) 3280, 3061, 3030, 2957, 2929, 2871, 1641, 1599, 1495, 1446, 1329, 1289, 1160, 1094, 1072; MS (EI): *m/z* (%): 461 (M<sup>+</sup>, 0.07), 418 ((M-C<sub>3</sub>H<sub>7</sub>)<sup>+</sup>, 20.6), 306 (100); Anal. Calcd. for C<sub>28</sub>H<sub>31</sub>NO<sub>3</sub>S (%): C 72.85, H 6.77, N 3.03; Found: C 72.49, H 6.64, N 2.62.

17. Synthesis of *N*-((7-phenyl-4-(propen-2-yl)-2-(*p*-tosyl)isoindolin-5-yl)methyl)-4-methylbenzenesulfonamide (**5ia**). (wwt-2-31, zyc-1-143)

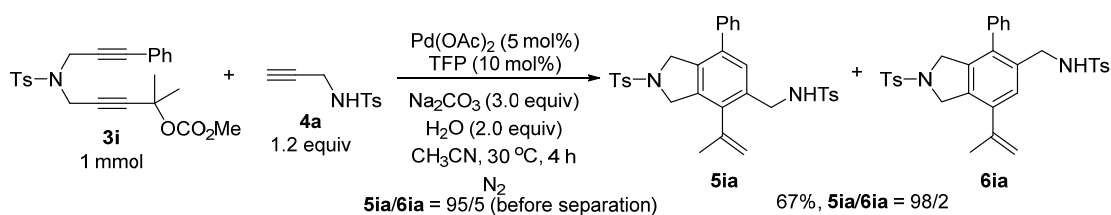

The reaction of Na<sub>2</sub>CO<sub>3</sub> (318.6 mg, 3.0 mmol), Pd(OAc)<sub>2</sub> (11.4 mg, 0.05 mmol), TFP (23.1 mg, 0.1 mmol), **4a** (251.2 mg, 1.2 mmol), **3i** (440.8 mg, 1.0 mmol), and H<sub>2</sub>O (36.2 mg, 2.0 mmol) in CH<sub>3</sub>CN (10 mL) afforded **5ia/6ia** (382.8 mg, 67%, **5ia/6ia** = 98/2 as determined by <sup>1</sup>H NMR analysis of the isolated product) (eluent: petroleum ether (60-90 °C)/ethyl acetate = 7/1 to 5/1 to petroleum ether (60-90 °C)/ethyl acetate/DCM = 6/1/1) (**5ia/6ia** = 95/5 as determined by <sup>1</sup>H NMR analysis of



the crude product using mesitylene (46  $\mu$ L) as the internal standard).

**5ia/6ia** (98/2): solid;  $^1\text{H}$  NMR (300 MHz,  $\text{CDCl}_3$ )  $\delta$  7.77-7.64 (m, 4 H, ArH), 7.46-7.16 (m, 9 H, ArH), 7.08 (s, 1 H, ArH), 5.26-5.18 (m, 1 H, one proton of  $=\text{CH}_2$ ), 4.79-4.74 (m, 1 H, one proton of  $=\text{CH}_2$ ), 4.70 (t,  $J = 5.7$  Hz, 1 H, NH), 4.64-4.57 (m, 2 H,  $\text{NCH}_2$ ), 4.52-4.45 (m, 2 H,  $\text{NCH}_2$ ), 4.08 (d,  $J = 6.0$  Hz, 2 H,  $\text{NCH}_2$ ), 2.40 (s, 3 H,  $\text{CH}_3$ ), 2.38 (s, 3 H,  $\text{CH}_3$ ), 1.87 (s, 3 H,  $\text{CH}_3$ );  $^{13}\text{C}$  NMR (75 MHz,  $\text{CDCl}_3$ )  $\delta$  143.7, 143.5, 141.4, 138.8, 137.2, 136.7, 136.1, 135.0, 133.6, 133.41, 133.37, 129.8, 129.6, 129.0, 128.6, 127.8, 127.7, 127.5, 127.0, 117.0, 53.6, 52.9, 44.1, 23.4, 21.4; IR (neat)  $\nu$  ( $\text{cm}^{-1}$ ) 3301, 2968, 2923, 2847, 1597, 1493, 1477, 1426, 1344, 1329, 1157, 1095, 1067; MS (EI):  $m/z$  (%) 572 ( $\text{M}^+$ , 2.87), 417 (100); Anal. Calcd. for  $\text{C}_{32}\text{H}_{32}\text{N}_2\text{O}_4\text{S}_2$  (%): C 67.11, H 5.63, N 4.89; Found: C 66.97, H 5.86, N 4.81. The following signals are discernible for **6ia**:  $^1\text{H}$  NMR (300 MHz,  $\text{CDCl}_3$ )  $\delta$  4.24-4.21 (m, 2 H,  $\text{NCH}_2$ ), 3.89 (d,  $J = 6.3$  Hz, 2 H,  $\text{CH}_2$ ), 1.75 (s, 3 H,  $\text{CH}_3$ ).

This mixture may further be purified by recrystallization to afford the pure product

**5ia**: m.p. 160.7-163.0  $^\circ\text{C}$  (*n*-hexane/DCM).

## Control experiments

1. Synthesis of 5,7-diphenyl-4-(propen-2-yl)-1,3-dihydroisobenzofuran (**5ah**).  
(zyc-1-113)

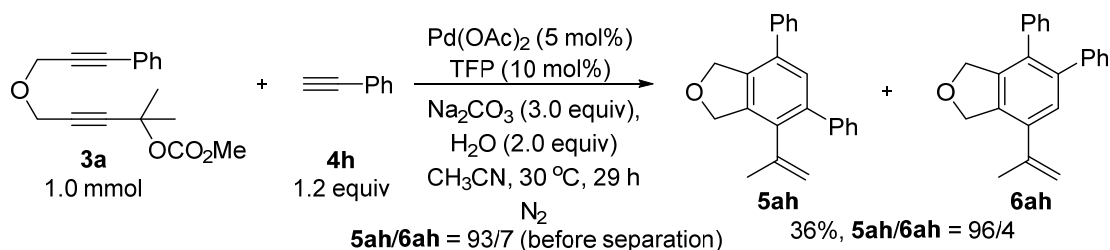

Following **Typical Procedure I**, the reaction of **3a** (286.1 mg, 1.0 mmol), **4h** (122.8 mg, 1.2 mmol),  $\text{Pd}(\text{OAc})_2$  (11.1 mg, 0.05 mmol), TFP (24.0 mg, 0.1 mmol),  $\text{Na}_2\text{CO}_3$  (317.4 mg, 3.0 mmol), and  $\text{H}_2\text{O}$  (36.1 mg, 2.0 mmol) in  $\text{CH}_3\text{CN}$  (10 mL) afforded **5ah/6ah** (119.7 mg, purity = 93%, 36%, **5ah/6ah** = 96/4 as determined by  $^1\text{H}$  NMR analysis of the isolated product) (The crude product was purified by column chromatography on silica gel (petroleum ether (60-90 °C)/ethyl acetate = 60/1) to afford impure **5ah/6ah** (determined by TLC). The impure **5ah/6ah** were purified by column chromatography on silica gel (petroleum ether (60-90 °C)/ethyl acetate = 100/1) to afford pure **5ah/6ah** and impure **5ah/6ah** (determined by TLC). The impure part was further purified by chromatography on silica gel (petroleum ether/ethyl acetate = 100/1) to afford another part of pure **5ah/6ah**.) (**5ah/6ah** = 93/7 as determined by  $^1\text{H}$  NMR analysis of the crude product using mesitylene (46  $\mu\text{L}$ ) as the internal standard).

**5ah/6ah** (96/4): solid;  $^1\text{H}$  NMR (300 MHz,  $\text{CDCl}_3$ )  $\delta$  7.55-7.27 (m, 11 H, ArH), 5.34-5.26 (m, 2 H,  $\text{OCH}_2$ ), 5.25-5.19 (m, 1 H, one proton of  $=\text{CH}_2$ ), 5.19-5.14 (m, 2 H,  $\text{OCH}_2$ ), 5.07-5.02 (m, 1 H, one proton of  $=\text{CH}_2$ ), 1.61 (s, 3 H,  $\text{CH}_3$ );  $^{13}\text{C}$  NMR (75

MHz, CDCl<sub>3</sub>)  $\delta$  143.6, 141.1, 139.8, 138.7, 136.2, 135.3, 134.5, 129.8, 129.1, 128.7, 128.0, 127.8, 127.5, 127.0, 116.9, 74.0, 73.8, 23.1; IR (KBr)  $\nu$  (cm<sup>-1</sup>) 3075, 3054, 3022, 2966, 2942, 2899, 2826, 1654, 1633, 1598, 1561, 1497, 1464, 1442, 1388, 1367, 1356, 1259, 1144, 1061, 1024; MS (EI):  $m/z$  (%) 312 (M<sup>+</sup>, 65.83), 267 (100). The following signals are discernible for **6ah**: <sup>1</sup>H NMR (300 MHz, CDCl<sub>3</sub>)  $\delta$  5.40-5.36 (m, 2 H, OCH<sub>2</sub>), 4.93-4.91 (m, 1 H, one proton of OCH<sub>2</sub>).

This mixture may further be purified by recrystallization to afford the pure product **5ah**: m.p. 87.2-89.2 °C (CHCl<sub>3</sub>); Anal. Calcd. for C<sub>23</sub>H<sub>20</sub>O (%): C 88.43, H 6.45; Found: C 88.20, H 6.51.

## 2. Synthesis of 5-butyl-7-phenyl-4-(propen-2-yl)-1,3-dihydroisobenzofuran (**5ai**). (zyc-2-28)

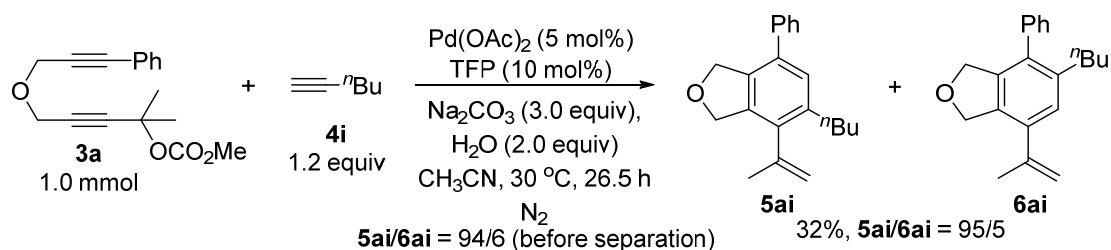

Following **Typical Procedure I**, the reaction of **3a** (285.9 mg, 1.0 mmol), **4i** (99.1 mg, 1.2 mmol), Pd(OAc)<sub>2</sub> (11.7 mg, 0.05 mmol), TFP (24.3 mg, 0.1 mmol), Na<sub>2</sub>CO<sub>3</sub> (319.0 mg, 3.0 mmol), and H<sub>2</sub>O (35.7 mg, 2.0 mmol) in CH<sub>3</sub>CN (10 mL) afforded **5ai/6ai** (98.4 mg, purity = 95%, 32%, **5ai/6ai** = 95/5 as determined by <sup>1</sup>H NMR of the isolated product) (The crude product was purified by column chromatography on silica gel (petroleum ether (60-90 °C)/ethyl acetate = 100/1) to afford impure **5ai/6ai** (163.4 mg), which was further purified by column

chromatography on silica gel (petroleum ether (60-90 °C)/ethyl acetate = 100/1)) (**5ai/6ai** = 94/6 as determined by  $^1\text{H}$  NMR analysis of the crude product using mesitylene (46  $\mu\text{L}$ ) as the internal standard).

**5ai/6ai** (95/5): liquid;  $^1\text{H}$  NMR (300 MHz,  $\text{CDCl}_3$ )  $\delta$  7.48-7.27 (m, 5 H, ArH), 7.20 (s, 1 H, ArH), 5.28-5.23 (m, 1 H, one proton of  $=\text{CH}_2$ ), 5.23-5.18 (m, 2 H,  $\text{OCH}_2$ ), 5.10-5.03 (m, 2 H,  $\text{OCH}_2$ ), 4.92-4.85 (m, 1 H, one proton of  $=\text{CH}_2$ ), 2.63 (t,  $J$  = 8.0 Hz, 2 H,  $\text{CH}_2$ ), 2.02 (t,  $J$  = 1.2 Hz, 3 H,  $\text{CH}_3$ ), 1.64-1.52 (m, 2 H,  $\text{CH}_2$ ), 1.47-1.31 (m, 2 H,  $\text{CH}_2$ ), 0.93 (t,  $J$  = 7.4 Hz, 3 H,  $\text{CH}_3$ );  $^{13}\text{C}$  NMR (75 MHz,  $\text{CDCl}_3$ )  $\delta$  143.1, 140.2, 139.6, 137.8, 136.1, 134.20, 134.18, 128.6, 128.5, 127.7, 127.2, 115.5, 73.9, 73.3, 34.3, 32.0, 23.8, 22.8, 14.0; IR (neat)  $\nu$  ( $\text{cm}^{-1}$ ) 3076, 3028, 2956, 2925, 2858, 1640, 1601, 1569, 1500, 1475, 1446, 1373, 1363, 1338, 1287, 1136, 1103, 1089, 1058, 1032; MS (EI):  $m/z$  (%) 292 ( $\text{M}^+$ , 100); HRMS calcd. for  $\text{C}_{21}\text{H}_{24}\text{O}$  [ $\text{M}^+$ ]: 292.1827, Found: 292.1826. The following signals are discernible for **6ai**:  $^1\text{H}$  NMR (300 MHz,  $\text{CDCl}_3$ )  $\delta$  7.12 (s, 1 H, ArH), 4.84-4.79 (m, 1 H, one proton of  $=\text{CH}_2$ ), 2.47 (t,  $J$  = 7.0 Hz, 2 H,  $\text{CH}_2$ ), 2.16-2.13 (m, 3 H,  $\text{CH}_3$ ), 0.77 (t,  $J$  = 7.2 Hz, 3 H,  $\text{CH}_3$ ).

### 3. Synthesis of (4,6-diphenyl-7-(propen-2-yl)-1,3-dihydroisobenzofuran-5-yl)methanol (**5aj**). (zyc-2-35)

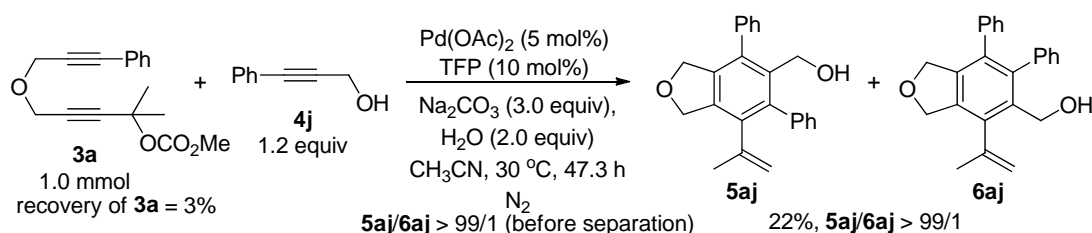

Following **Typical Procedure I**, the reaction of **3a** (286.5 mg, 1.0 mmol), **4j**

(159.4 mg, 1.2 mmol), Pd(OAc)<sub>2</sub> (11.9 mg, 0.05 mmol), TFP (23.4 mg, 0.1 mmol), Na<sub>2</sub>CO<sub>3</sub> (318.7 mg, 3.0 mmol), and H<sub>2</sub>O (36.1 mg, 2.0 mmol) in CH<sub>3</sub>CN (10 mL) afforded **5aj** (75.4 mg, 22%, **5aj/6aj** > 99/1 as determined by <sup>1</sup>H NMR of the isolated product) (eluent: petroleum ether (60-90 °C)/ethyl acetate = 10/1) (**5aj/6aj** > 99/1 as determined by <sup>1</sup>H NMR of the crude product using mesitylene (46 µL) as the internal standard, recovery of **3a** = 3%).

**5aj**: solid; m.p. 146.6-148.5 °C (DCM/hexane); <sup>1</sup>H NMR (300 MHz, CDCl<sub>3</sub>) δ 7.53-7.28 (m, 10 H, ArH), 5.18-5.12 (m, 2 H, OCH<sub>2</sub>), 5.08-5.02 (m, 1 H, one proton of =CH<sub>2</sub>), 4.97-4.91 (m, 2 H, OCH<sub>2</sub>), 4.88-4.81 (m, 1 H, one proton of =CH<sub>2</sub>), 4.22 (d, *J* = 6.0 Hz, 2 H, OCH<sub>2</sub>), 1.58 (t, *J* = 1.1 Hz, 3 H, CH<sub>3</sub>), 1.32 (t, *J* = 6.0 Hz, 1 H, OH); <sup>13</sup>C NMR (75 MHz, CDCl<sub>3</sub>) δ 143.4, 140.3, 138.9, 138.5, 137.8, 136.8, 136.5, 135.8, 135.2, 130.2, 128.8, 128.4, 127.7, 127.5, 127.1, 116.5, 74.1, 74.0, 59.5, 23.2; IR (KBr) ν (cm<sup>-1</sup>) 3447, 3074, 3060, 3028, 2951, 2911, 2860, 1639, 1598, 1497, 1469, 1441, 1364, 1310, 1272, 1205, 1177, 1049, 1024, 1001; MS (EI): *m/z* (%) 342 (M<sup>+</sup>, 19.42), 279 (100); HRMS calcd. for C<sub>24</sub>H<sub>22</sub>O<sub>2</sub> [M<sup>+</sup>]: 342.1620, Found: 342.1620.

#### 4. Synthesis of 5-methyl-4,6-diphenyl-7-(propen-2-yl)-1,3-dihydroisobenzofuran (**5ak**). (zyc-2-51, zyc-2-60)

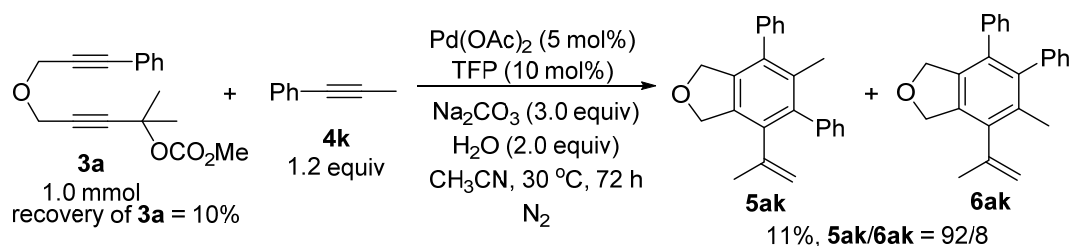

Following **Typical Procedure I**, the reaction of **3a** (286.2 mg, 1.0 mmol), **4k**

(143.4 mg, 1.2 mmol), Pd(OAc)<sub>2</sub> (11.3 mg, 0.05 mmol), TFP (23.8 mg, 0.1 mmol), Na<sub>2</sub>CO<sub>3</sub> (318.3 mg, 3.0 mmol), and H<sub>2</sub>O (36.1 mg, 2.0 mmol) in CH<sub>3</sub>CN (10 mL) afforded **5ak/6ak** (36.0 mg, 11%, **5ak/6ak** = 92/8 as determined by <sup>1</sup>H NMR analysis of the isolated product) (eluent: petroleum ether (60-90 °C)/ethyl acetate = 100/1) (Recovery of **3a** = 10% as determined by <sup>1</sup>H NMR of the crude product using mesitylene (46 µL) as the internal standard).

**5ak/6ak** (92/8): solid; <sup>1</sup>H NMR (300 MHz, CDCl<sub>3</sub>) δ 7.48-7.18 (m, 10 H, ArH), 5.17-5.09 (m, 2 H, OCH<sub>2</sub>), 5.05-4.99 (m, 1 H, one proton of =CH<sub>2</sub>), 4.95-4.89 (m, 2 H, OCH<sub>2</sub>), 4.87-4.81 (m, 1 H, one proton of =CH<sub>2</sub>), 1.85 (s, 3 H, CH<sub>3</sub>), 1.57 (s, 3 H, CH<sub>3</sub>); <sup>13</sup>C NMR (75 MHz, CDCl<sub>3</sub>) δ 143.9, 140.5, 139.8, 139.7, 137.3, 136.2, 134.7, 134.2, 133.3, 130.1, 128.7, 128.5, 127.8, 127.2, 126.7, 116.2, 74.3, 74.1, 23.3, 18.4; IR (KBr) ν (cm<sup>-1</sup>) 3075, 3045, 3019, 2959, 2899, 2850, 1493, 1439, 1371, 1358, 1330, 1289, 1261, 1220, 1177, 1056, 1027; GC-MS (GC condition: injector: 280 °C; column: DB-5, temperature: 60 °C (2 min), 20 °C/min to 280 °C, 280 °C (30 min)) (EI) *m/z* (%) for **5ak**: T<sub>R</sub> 5.6 min: 326 (M<sup>+</sup>, 100), 311 ((M-CH<sub>3</sub>)<sup>+</sup>, 29.97); for **6ak**: T<sub>R</sub> 5.4 min: 326 (M<sup>+</sup>, 100), 311 ((M-CH<sub>3</sub>)<sup>+</sup>, 18.14); HRMS calcd. for C<sub>24</sub>H<sub>22</sub>O [M<sup>+</sup>]: 326.1671, Found: 326.1672. The following signals are discernible for **6ak**: <sup>1</sup>H NMR (300 MHz, CDCl<sub>3</sub>) δ 7.19-7.06 (m, 6 H, ArH), 7.03-6.96 (m, 4 H, ArH), 5.30-5.25 (m, 1 H, one proton of =CH<sub>2</sub>), 4.98-4.95 (m, 2 H, OCH<sub>2</sub>), 2.05 (s, 6 H, CH<sub>3</sub> × 2).

This mixture may further be purified by recrystallization to afford the pure product **5ak**: m.p. 146.8-148.3 °C (DCM/*n*-hexane).

5. The reaction of **3a** and **4l** under the standard conditions. (zyc-2-138)

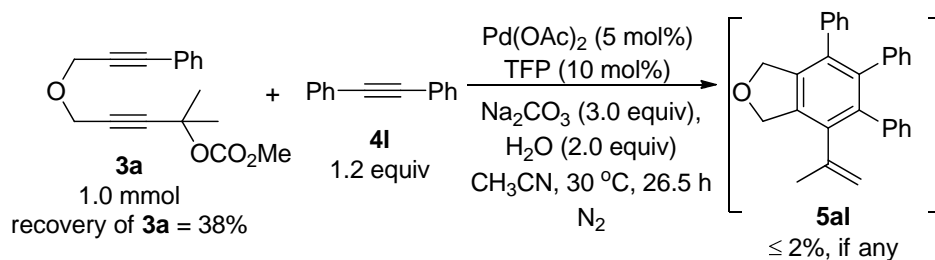

Following **Typical Procedure I**, the reaction of **3a** (286.1 mg, 1.0 mmol), **4l** (213.8 mg, 1.2 mmol),  $\text{Pd}(\text{OAc})_2$  (11.1 mg, 0.05 mmol), TFP (23.8 mg, 0.1 mmol),  $\text{Na}_2\text{CO}_3$  (317.9 mg, 3.0 mmol), and  $\text{H}_2\text{O}$  (35.9 mg, 2.0 mmol) in  $\text{CH}_3\text{CN}$  (10 mL) afforded 7.3 mg of a complicated mixture (**5al**,  $\leq 2\%$ , if any) with 38% recovery of **3a** as determined by  $^1\text{H}$  NMR analysis of the crude residue using mesitylene (46  $\mu\text{L}$ ) as the internal standard.

6. The reaction of **3a-OH** and **4a** under the standard conditions. (zyc-3-31)

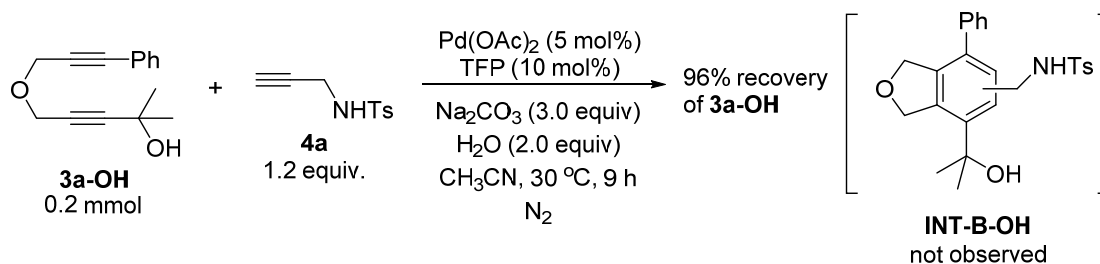

Following **Typical Procedure I**, the reaction of **3a-OH** (45.5 mg, 0.2 mmol), **4a** (50.3 mg, 0.24 mmol),  $\text{Pd}(\text{OAc})_2$  (2.2 mg, 0.01 mmol), TFP (4.7 mg, 0.02 mmol),  $\text{Na}_2\text{CO}_3$  (63.7 mg, 0.6 mmol), and  $\text{H}_2\text{O}$  (7.2  $\mu\text{L}$ ,  $d = 1.0$  g/mL, 7.2 mg, 0.4 mmol) in  $\text{CH}_3\text{CN}$  (2 mL) afforded 96% recovery of **3a-OH** as determined by  $^1\text{H}$  NMR analysis of the crude residue using mesitylene (9.2  $\mu\text{L}$ ) as the internal standard.

## 7. Synthesis of starting material **3a-d<sub>6</sub>**. (zyc-2-74)

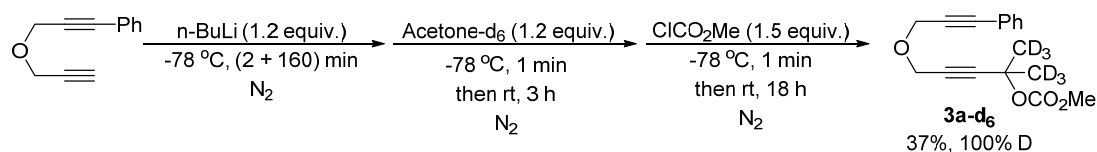

To a solution of 3-(propargyloxy)-phenyl-1-propyne (942.7 mg, 5.54 mmol) in THF (13 mL) were added dropwise *n*-BuLi (2.5 M in hexane, 2.64 mL, 6.6 mmol) at -78 °C within 2 minutes under N<sub>2</sub> atmosphere. After lithiation for 160 minutes at -78 °C, acetone-d<sub>6</sub> (0.5 mL, d = 0.852 g/mL, 426.0 mg, 6.64 mmol, 99.8% D) was added dropwise with an addition funnel at -78 °C within 1 minute. After the cooling bath was removed, the reaction mixture was warmed up to room temperature and stirred for 3 h. Then methyl chloroformate (0.64 mL, d = 1.22 g/mL, 780.8 mg, 8.26 mmol) was added dropwise at -78 °C within 1 minute. After the cooling bath was removed, the reaction mixture was warmed up to room temperature and stirred for 18 h. After the reaction was complete as monitored by TLC (eluent: petroleum ether/ ethyl acetate = 10/1), it was quenched with an aqueous solution of saturated NH<sub>4</sub>Cl (10 mL). The resulting mixture was extracted with ethyl acetate (10 mL × 3) and the combined organic phase was dried over anhydrous Na<sub>2</sub>SO<sub>4</sub>. After filtration and evaporation of the solvent, the crude residue was purified by chromatography on silica gel (eluent: petroleum ether (60-90 °C)/ ethyl acetate = 100/1 (500 mL), and then petroleum ether/ ethyl acetate/diethyl ether = 100/1/1 (1500 mL) to 100/4/1 (800 mL)) to afford **3a-d<sub>6</sub>** (594.3 mg, 37%, 100% D) as a liquid: <sup>1</sup>H NMR (300 MHz, CDCl<sub>3</sub>) δ 7.49-7.41 (m, 2 H, ArH), 7.36-7.27 (m, 3 H, ArH), 4.47 (s, 2 H, OCH<sub>2</sub>), 4.36 (s, 2 H, OCH<sub>2</sub>), 3.76 (s, 3 H, OCH<sub>3</sub>); <sup>13</sup>C NMR (75 MHz, CDCl<sub>3</sub>) δ 153.5, 131.7, 128.5, 128.2, 122.5, 87.3,



86.7, 84.3, 80.0, 73.8, 57.2, 56.8, 54.3, 27.8 (septet); IR (neat)  $\nu$  (cm<sup>-1</sup>) 3054, 3022, 2955, 2898, 2852, 1755, 1599, 1490, 1442, 1383, 1351, 1271, 1233, 1194, 1119, 1083, 1013; MS (EI):  $m/z$  (%) 292 (M<sup>+</sup>, 1.39), 115 (100); HRMS calcd. for C<sub>17</sub>H<sub>12</sub>D<sub>6</sub>O<sub>4</sub>[M<sup>+</sup>]: 292.1582, Found: 292.1582.

8. Synthesis of *N*-((7-phenyl-4-(propen-2-yl-*d*<sub>5</sub>)-1,3-dihydroisobenzofuran-5-yl)methyl)-4-methylbenzenesulfonamide (**5aa-d<sub>5</sub>**). (zyc-2-76)

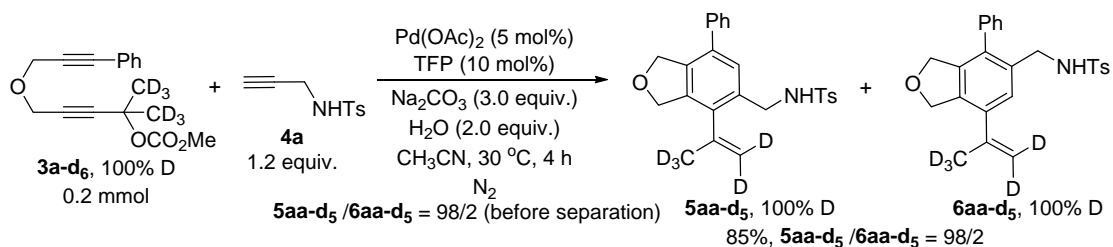

Following **Typical Procedure I**, the reaction of **3a-d<sub>6</sub>** (58.6 mg, 0.2 mmol), **4a** (50.4 mg, 0.24 mmol), Pd(OAc)<sub>2</sub> (2.3 mg, 0.01 mmol), TFP (4.8 mg, 0.02 mmol), Na<sub>2</sub>CO<sub>3</sub> (63.6 mg, 0.4 mmol), and H<sub>2</sub>O (7.2  $\mu$ L,  $d$  = 1.00 g/mL, 7.2 mg, 0.4 mmol) in CH<sub>3</sub>CN (2 mL) afforded **5aa-d<sub>5</sub>**/**6aa-d<sub>5</sub>** (72.4 mg, 85%, 100% D, **5aa-d<sub>5</sub>**/**6aa-d<sub>5</sub>** = 98/2 as determined by <sup>1</sup>H NMR analysis of the isolated product) (eluent: petroleum ether (60-90 °C)/ethyl acetate = 5/1) (**5aa-d<sub>5</sub>**/**6aa-d<sub>5</sub>** = 98/2 as determined by <sup>1</sup>H NMR analysis of the crude product using mesitylene (9.2  $\mu$ L) as the internal standard).

**5aa-d<sub>5</sub>**/**6aa-d<sub>5</sub>** (98/2): solid; <sup>1</sup>H NMR (300 MHz, CDCl<sub>3</sub>)  $\delta$  7.72 (d,  $J$  = 8.1 Hz, 2 H, ArH), 7.42-7.10 (m, 8 H, ArH), 5.36-5.20 (t,  $J$  = 6.0 Hz, 1 H, NH), 5.15-5.04 (m, 2 H, OCH<sub>2</sub>), 5.03-4.90 (m, 2 H, OCH<sub>2</sub>), 4.14 (d,  $J$  = 5.7 Hz, 2 H, NCH<sub>2</sub>), 2.36 (s, 3 H, CH<sub>3</sub>); <sup>13</sup>C NMR (75 MHz, CDCl<sub>3</sub>)  $\delta$  143.3, 141.6, 139.3, 138.1, 136.9, 136.5, 135.9, 134.6, 133.0, 129.5, 128.5, 128.4, 127.6, 127.4, 127.0, 116.0 (pentet), 73.6, 72.8, 44.1,

22.3 (septet); IR (KBr)  $\nu$  ( $\text{cm}^{-1}$ ) 3259, 3054, 2901, 2830, 1598, 1495, 1470, 1453, 1330, 1306, 1153, 1114, 1096, 1073, 1050; MS (EI):  $m/z$  (%) 424 ( $\text{M}^+$ , 0.14), 269 ( $(\text{M-Ts})^+$ , 100); HRMS calcd. for  $\text{C}_{25}\text{H}_{20}\text{D}_5\text{NO}_3\text{S}$  [ $\text{M}^+$ ]: 424.1869, Found: 424.1870. The following signals are discernible for **6aa**:  $^1\text{H}$  NMR (300 MHz,  $\text{CDCl}_3$ )  $\delta$  7.53 (d,  $J = 8.4$  Hz, 2 H, ArH), 4.74-4.70 (m, 2 H,  $\text{CH}_2$ ), 3.96 (d,  $J = 5.7$  Hz, 2 H,  $\text{NCH}_2$ ).

This mixture may further be purified by recrystallization to afford the pure product **5aa-d<sub>5</sub>**: m.p. 150.4-152.0  $^\circ\text{C}$  (*n*-hexane/DCM).

## Deuterium labelling experiments

### 1. Synthesis of starting material **D-4c**. (zyc-3-35)

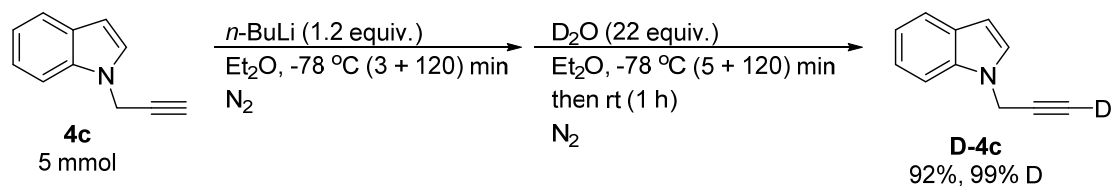

To a solution of **4c** (776.1 mg, 5.0 mmol) in Et<sub>2</sub>O (30 mL) were added dropwise *n*-BuLi (2.5 M in hexane, 2.4 mL, 6.0 mmol) at -78 °C within 3 minutes under N<sub>2</sub> atmosphere. After lithiation for 120 minutes at -78 °C, D<sub>2</sub>O (2.2 mL, d = 1.0 g/mL, 2200 mg, 110 mmol, 99.9% D) was added dropwise at -78 °C within 5 minutes. The resulting mixture was stirred for 2 hours. After the cooling bath was removed, the reaction mixture was warmed up to room temperature and stirred for 1 h. The resulting mixture was dried over anhydrous Na<sub>2</sub>SO<sub>4</sub>. After filtration and evaporation of the solvent, the crude residue was purified by chromatography on silica gel (eluent: petroleum ether (60-90 °C)/ ethyl acetate = 10/1) to afford **D-4c** (719.6 mg, 92%, 99% D) as a solid: m.p. 41.9-42.5 °C (*n*-hexane/Et<sub>2</sub>O, -20 °C); <sup>1</sup>H NMR (300 MHz, CDCl<sub>3</sub>) δ 7.64 (d, *J* = 7.8 Hz, 1 H, ArH), 7.40 (d, *J* = 8.1 Hz, 1 H, ArH), 7.30-7.21 (m, 1 H, ArH), 7.20 (d, *J* = 3.3 Hz, 1 H, ArH), 7.18-7.09 (m, 1 H, ArH), 6.57-6.51 (m, 1 H, ArH), 4.86 (s, 2 H, NCH<sub>2</sub>); <sup>13</sup>C NMR (75 MHz, CDCl<sub>3</sub>) δ 135.7, 128.8, 127.2, 121.8, 121.1, 119.8, 109.3, 102.0, 77.2 (t, *J* = 7.6 Hz), 73.2 (t, *J* = 38.5 Hz), 35.7; IR (neat) ν (cm<sup>-1</sup>) 3055, 2589, 1986, 1612, 1514, 1484, 1463, 1397, 1363, 1335, 1315, 1259, 1189, 1012; MS (EI): *m/z* (%) 156 (M<sup>+</sup>, 61.71), 155 (100); HRMS calcd. for C<sub>11</sub>H<sub>8</sub>DN [M<sup>+</sup>]: 156.0798, Found: 156.0795. The following signal is discernible for **4c**: 2.32 (s, 1 H, ≡CH).

## 2. Synthesis of **5ac**. (zyc-3-36)

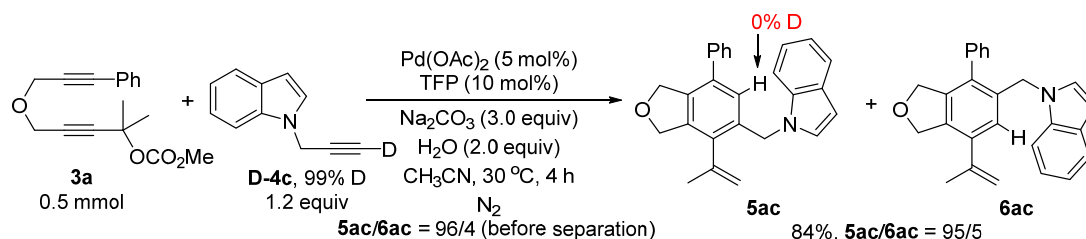

Following **Typical Procedure I**, the reaction of  $\text{Na}_2\text{CO}_3$  (159.0 mg, 1.5 mmol),  $\text{Pd}(\text{OAc})_2$  (5.6 mg, 0.025 mmol), TFP (11.7 mg, 0.05 mmol), **D-4c** (93.8 mg, 0.6 mmol, 100% D), **3a** (143.0 mg, 0.5 mmol), and  $\text{H}_2\text{O}$  (18.1 mg, 1.0 mmol) in  $\text{CH}_3\text{CN}$  (5 mL) afforded **5ac/6ac** (153.4 mg, 84%, 0% D, **5ac/6ac** = 95/5 as determined by  $^1\text{H}$  NMR analysis of the isolated product) (eluent: petroleum ether (60-90 °C)/ethyl acetate = 30/1) (**5ac/6ac** = 96/4 as determined by  $^1\text{H}$  NMR analysis of the crude product using mesitylene (23  $\mu\text{L}$ ) as the internal standard).

**5ac/6ac** (95/5): solid;  $^1\text{H}$  NMR (300 MHz,  $\text{CDCl}_3$ )  $\delta$  7.62 (d,  $J$  = 7.8 Hz, 1 H, ArH), 7.45-7.03 (m, 9 H, ArH), 6.93 (s, 1 H, ArH), 6.56-6.47 (m, 1 H, ArH), 5.37-5.28 (m, 3 H, one proton of  $=\text{CH}_2$  and  $\text{NCH}_2$ ), 5.23-5.17 (m, 2 H,  $\text{OCH}_2$ ), 5.13-5.06 (m, 2 H,  $\text{OCH}_2$ ), 5.02-4.95 (m, 1 H, one proton of  $=\text{CH}_2$ ), 1.89 (s, 3 H,  $\text{CH}_3$ );  $^{13}\text{C}$  NMR (75 MHz,  $\text{CDCl}_3$ )  $\delta$  142.1, 139.4, 138.4, 136.6, 136.3, 135.8, 134.8, 134.0, 128.6, 128.0, 127.6, 127.5, 127.3, 121.5, 120.9, 119.4, 116.3, 109.5, 101.7, 73.7, 73.0, 47.2, 23.1. The following signals are discernible for **6ac**:  $^1\text{H}$  NMR (300 MHz,  $\text{CDCl}_3$ )  $\delta$  6.48-6.44 (m, 1 H, ArH), 5.46-5.38 (m, 3 H, one proton of  $=\text{CH}_2$  and  $\text{NCH}_2$ ), 5.15 (s, 2 H,  $\text{OCH}_2$ ).

### 3. Synthesis of **D-5ac**. (zyc-3-46)

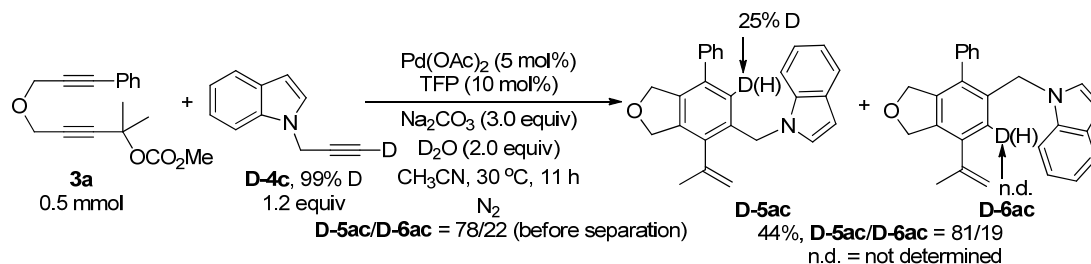

Following **Typical Procedure I**, the reaction of  $\text{Na}_2\text{CO}_3$  (158.9 mg, 1.5 mmol),  $\text{Pd(OAc)}_2$  (5.5 mg, 0.025 mmol), TFP (11.5 mg, 0.05 mmol), **D-4c** (93.7 mg, 0.6 mmol, 100% D), **3a** (143.0 mg, 0.5 mmol), and  $\text{D}_2\text{O}$  (20.1 mg, 1.0 mmol) in  $\text{CH}_3\text{CN}$  (5 mL) afforded **D-5ac/D-6ac** (81.1 mg, 44%, 25% D,  $\text{D-5ac/D-6ac} = 81/19$  as determined by  $^1\text{H}$  NMR analysis of the isolated product) (eluent: petroleum ether (60-90  $^\circ\text{C}$ )/ethyl acetate = 30/1) ( $\text{D-5ac/D-6ac} = 78/22$  as determined by  $^1\text{H}$  NMR analysis of the crude product using mesitylene (23  $\mu\text{L}$ ) as the internal standard).

**D-5ac/D-6ac** (81/19): solid;  $^1\text{H}$  NMR (300 MHz,  $\text{CDCl}_3$ )  $\delta$  7.61 (d,  $J = 7.8$  Hz, 1 H, ArH), 7.45-7.01 (m, 9 H, ArH), 6.51 (d,  $J = 3.0$  Hz, 1 H, ArH), 5.34-5.25 (m, 3 H, one proton of  $=\text{CH}_2$  and  $\text{NCH}_2$ ), 5.23-5.15 (m, 2 H,  $\text{OCH}_2$ ), 5.12-5.04 (m, 2 H,  $\text{OCH}_2$ ), 5.01-4.93 (m, 1 H, one proton of  $=\text{CH}_2$ ), 1.88 (s, 3 H,  $\text{CH}_3$ ); IR (neat)  $\nu$  ( $\text{cm}^{-1}$ ) 3056, 2912, 2852, 1640, 1611, 1512, 1475, 1462, 1362, 1317, 1191, 1060; MS (EI):  $m/z$  (%) 366 ( $(\text{M(D)})^+$ , 34.62), 365 ( $(\text{M(H)})^+$ , 67.29), 350 (100); HRMS calcd. for  $\text{C}_{26}\text{H}_{22}\text{DNO}$  [ $\text{M}^+$ ]: 366.1842, Found: 366.1836. The following signals are discernible for **D-6ac**:  $^1\text{H}$  NMR (300 MHz,  $\text{CDCl}_3$ )  $\delta$  6.47-6.43 (m, 1 H, ArH), 5.45-5.39 (m, 2 H,  $\text{NCH}_2$ ), 5.14 (s, 2 H,  $\text{OCH}_2$ ). The following signal is discernible for **5ac**: 6.93 (s, 1 H, ArH).

### 4. Synthesis of **D-4c'**. (zyc-3-48)

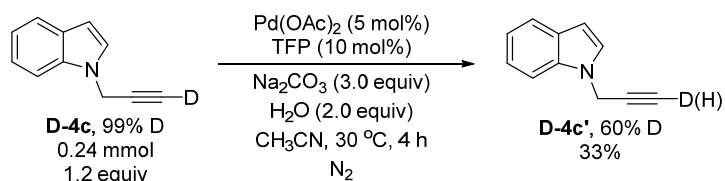

Following **Typical Procedure I**, the reaction of  $\text{Na}_2\text{CO}_3$  (63.6 mg, 0.6 mmol),  $\text{Pd}(\text{OAc})_2$  (2.2 mg, 0.01 mmol), TFP (4.6 mg, 0.02 mmol), **D-4c** (37.6 mg, 0.24 mmol), and  $\text{H}_2\text{O}$  (7.2  $\mu\text{L}$ ,  $d = 1.0 \text{ g/mL}$ , 7.2 mg, 0.4 mmol) in  $\text{CH}_3\text{CN}$  (2 mL) afforded **D-4c'** (12.5 mg, 33%, 60% D) (eluent: petroleum ether (60-90  $^\circ\text{C}$ )/ethyl acetate = 20/1) as a solid:  $^1\text{H}$  NMR (400 MHz,  $\text{CDCl}_3$ )  $\delta$  7.63 (d,  $J = 7.6 \text{ Hz}$ , 1 H, ArH), 7.40 (d,  $J = 8.4 \text{ Hz}$ , 1 H, ArH), 7.28-7.21 (m, 1 H, ArH), 7.19 (d,  $J = 3.2 \text{ Hz}$ , 1 H, ArH), 7.17-7.09 (m, 1 H, ArH), 6.53 (d,  $J = 3.2 \text{ Hz}$ , 1 H, ArH), 4.88-4.82 (m, 2 H,  $\text{NCH}_2$ ). The following signal is discernible for **4c**: 2.38 (t,  $J = 2.0 \text{ Hz}$ , 1 H,  $\equiv\text{CH}$ ).

#### 5. Synthesis of **D-5ac**. (zyc-3-41)

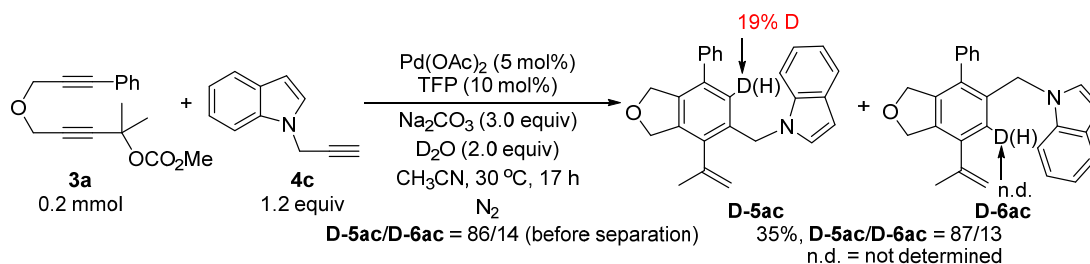

Following **Typical Procedure I**, the reaction of  $\text{Na}_2\text{CO}_3$  (63.6 mg, 0.6 mmol),  $\text{Pd}(\text{OAc})_2$  (2.2 mg, 0.01 mmol), TFP (4.6 mg, 0.02 mmol), **4c** (37.2 mg, 0.24 mmol), **3a** (57.4 mg, 0.2 mmol), and  $\text{D}_2\text{O}$  (8.0  $\mu\text{L}$ ,  $d = 1.0 \text{ g/mL}$ , 8.0 mg, 0.4 mmol) in  $\text{CH}_3\text{CN}$  (2 mL) afforded **D-5ac/D-6ac** (25.9 mg, 35%, 19% D, **D-5ac/D-6ac** = 87/13 as determined by  $^1\text{H}$  NMR analysis of the isolated product) (eluent: petroleum ether (60-90  $^\circ\text{C}$ )/ethyl acetate = 30/1) (**D-5ac/D-6ac** = 86/14 as determined by  $^1\text{H}$  NMR

analysis of the crude product using mesitylene (9.2  $\mu$ L) as the internal standard).

**D-5ac/D-6ac** (87/13): solid;  $^1\text{H}$  NMR (300 MHz,  $\text{CDCl}_3$ )  $\delta$  7.63 (d,  $J = 7.8$  Hz, 1 H, ArH), 7.48-7.04 (m, 9 H, ArH), 6.52 (d,  $J = 3.0$  Hz, 1 H, ArH), 5.38-5.28 (m, 3 H, one proton of  $=\text{CH}_2$  and  $\text{NCH}_2$ ), 5.24-5.17 (m, 2 H,  $\text{OCH}_2$ ), 5.13-5.07 (m, 2 H,  $\text{OCH}_2$ ), 5.02-4.95 (m, 1 H, one proton of  $=\text{CH}_2$ ), 1.90 (s, 3 H,  $\text{CH}_3$ ). The following signals are discernible for **D-6ac**:  $^1\text{H}$  NMR (300 MHz,  $\text{CDCl}_3$ )  $\delta$  6.48-6.44 (m, 1 H, ArH), 5.46-5.42 (m, 2 H,  $\text{NCH}_2$ ), 5.15 (s, 2 H,  $\text{OCH}_2$ ). The following signal is discernible for **5ac**: 6.93 (s, 1 H, ArH).

## Synthetic applications

1. Synthesis of 10-methyl-4-phenyl-7-(*p*-tosyl)-1,3,6,8-tetrahydro-1*H*-isobenzofuro-[5,4-*c*]azepine (**8aa**).<sup>5,6</sup> (zyc-1-148, zyc-1-164)

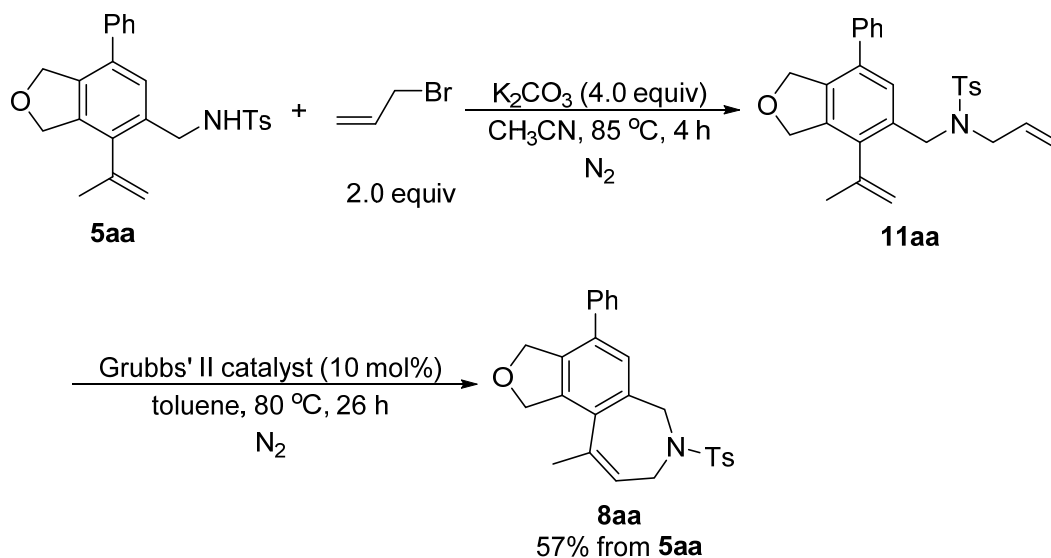

To a flame-dried Schlenk tube were added  $\text{K}_2\text{CO}_3$  (429.6 mg, 3.12 mmol), **5aa** (327.1 mg, 0.78 mmol), and allyl bromide (188.6 mg, 1.56 mmol)/ $\text{CH}_3\text{CN}$  (2 mL) sequentially under  $\text{N}_2$  atmosphere. Then the Schlenk tube was equipped with an internal condenser pipe and the resulting mixture was stirred with an oil bath pre-heated at 85  $^\circ\text{C}$ . The reaction was complete after being stirred for 4 hours as monitored by TLC. The reaction mixture was filtrated through a short column of silica gel eluted with ethyl acetate (5 mL  $\times$  3). After evaporation, the residue was purified by chromatography on silica gel to afford **11aa** (296.1 mg) (eluent: petroleum ether (60-90  $^\circ\text{C}$ )/ethyl acetate/DCM = 20/1/1): solid;  $^1\text{H}$  NMR (300 MHz,  $\text{CDCl}_3$ )  $\delta$  7.75 (d,  $J$  = 8.4 Hz, 2 H, ArH), 7.45-7.25 (m, 8 H, ArH), 5.63-5.45 (m, 1 H, =CH), 5.30-5.10 (m, 3 H, one proton of = $\text{CH}_2$  and  $\text{OCH}_2$ ), 5.07-4.90 (m, 4 H,  $\text{OCH}_2$  and = $\text{CH}_2$ ), 4.83 (s, 1 H, one proton of = $\text{CH}_2$ ), 4.44 (s, 2 H,  $\text{NCH}_2$ ), 3.82 (d,  $J$  = 6.6 Hz, 2



H, NCH<sub>2</sub>), 2.39 (s, 3 H, CH<sub>3</sub>), 1.95 (s, 3 H, CH<sub>3</sub>); <sup>13</sup>C NMR (75 MHz, CDCl<sub>3</sub>) δ 143.2, 141.8, 139.5, 138.1, 137.3, 136.1, 135.7, 134.5, 132.7, 132.4, 129.7, 128.5, 127.6, 127.4, 127.2, 127.1, 119.1, 116.3, 73.7, 72.9, 49.9, 47.0, 23.3, 21.4. which was used directly in the next step without further characterization.

To a flame-dried Schlenk tube were added Grubbs' II catalyst (17.1 mg, 0.02 mmol), **11aa** (94.9 mg, 0.21 mmol), and toluene (10 mL) sequentially under N<sub>2</sub> atmosphere. Then the Schlenk tube was equipped with an internal condenser pipe and the resulting mixture was stirred in an oil bath pre-heated at 80 °C. The reaction was complete after being stirred for 26 hours as monitored by TLC (eluent: petroleum ether (60-90 °C)/ethyl acetate/DCM = 20/1/1). The resulting mixture was filtrated through a short column of silica gel eluted with ethyl acetate (10 mL × 3). After evaporation, the residue was purified by chromatography on silica gel to afford **8aa** (61.1 mg, 57% from **5aa**) (eluent: petroleum ether (60-90 °C)/ethyl acetate/DCM = 20/1/1 to 10/1/1).

**8aa**: solid; m.p. 162.6-164.6 °C (DCM/hexane); <sup>1</sup>H NMR (300 MHz, CDCl<sub>3</sub>) δ 7.73 (d, *J* = 8.4 Hz, 2 H, ArH), 7.49-7.34 (m, 3 H, ArH), 7.33-7.18 (m, 4 H, ArH), 6.95 (s, 1 H, ArH), 5.86 (tq, *J*<sub>1</sub> = 7.4 Hz, *J*<sub>2</sub> = 1.4 Hz, 1 H, =CH), 5.11 (s, 4 H, OCH<sub>2</sub> × 2), 4.22 (s, 2 H, NCH<sub>2</sub>), 3.52 (brs, 2 H, NCH<sub>2</sub>), 2.37 (s, 3 H, CH<sub>3</sub>), 2.00 (d, *J* = 1.2 Hz, 3 H, CH<sub>3</sub>); <sup>13</sup>C NMR (75 MHz, CDCl<sub>3</sub>) δ 143.3, 141.0, 139.1, 137.9, 137.4, 136.2, 135.2, 133.5, 132.7, 129.6, 129.3, 128.6, 127.65, 127.56, 127.4, 122.3, 73.3, 72.8, 49.1, 42.9, 21.3, 21.2; IR (neat) ν (cm<sup>-1</sup>) 3054, 3028, 2963, 2917, 2857, 1631, 1597, 1493, 1457, 1446, 1400, 1378, 1362, 1325, 1307, 1292, 1164, 1112, 1089, 1072, 1059;

MS (EI):  $m/z$  (%) 431 ( $M^+$ , 11.94), 276 ( $(M-Ts)^+$ , 100); HRMS calcd. for  $C_{26}H_{25}NO_3S$  [ $M^+$ ]: 431.1555, Found: 431.1558.

2. Synthesis of *trans*-2-iodo-4'-phenyl-7'-(*p*-tosyl)-1',3',6'-trihydrospiro[cyclopentane-1,8'-[7*H*]-furo[3,4-*e*]isoindole] (**9ba**).<sup>7</sup> (wwt-3-51)

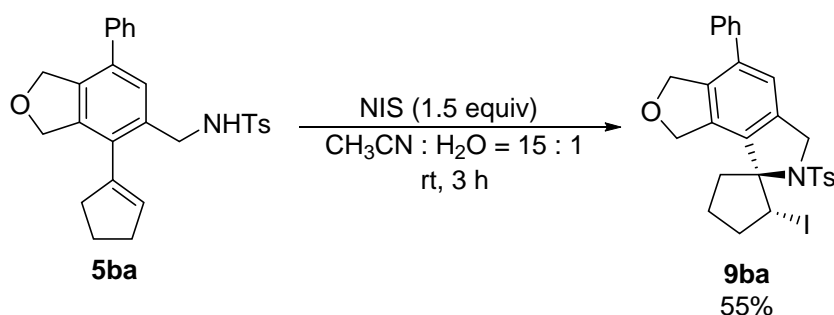

To a dry Schlenk tube were added **5ba** (89.1 mg, 0.2 mmol),  $CH_3CN$  (2.0 mL), water (0.14 mL), and NIS (67.8 mg, 0.3 mmol) sequentially. The reaction was complete after being stirred at room temperature for 3 hours as monitored by TLC. It was then quenched with an aqueous solution of saturated  $Na_2S_2O_3$  (5 mL). The resulting mixture was extracted with ethyl ether (10 mL  $\times$  3), and the combined organic phase was dried over anhydrous  $Na_2SO_4$ . After filtration and evaporation of the solvent, the crude residue was purified by chromatography on silica gel to afford **9ba** (62.3 mg, 55%) (eluent: petroleum ether (60-90 °C)/ethyl acetate = 15/1).

**9ba**: solid; m.p. 135.0-137.2 °C (DCM/hexane);  $^1H$  NMR (300 MHz,  $CDCl_3$ )  $\delta$  7.82 (d,  $J$  = 8.1 Hz, 2 H, ArH), 7.50-7.28 (m, 7 H, ArH), 7.12 (s, 1 H, ArH), 5.33 (dd,  $J_1$  = 12.9 Hz,  $J_2$  = 7.2 Hz, 1 H, CH), 5.27-5.14 (m, 3 H,  $OCH_2$  and one proton of  $OCH_2$ ), 5.07 (d,  $J$  = 12.3 Hz, 1 H, one proton of  $CH_2$ ), 4.64 (d,  $J$  = 12.9 Hz, 1 H, one proton of  $NCH_2$ ), 4.59 (d,  $J$  = 12.9 Hz, 1 H, one proton of  $NCH_2$ ), 2.95-2.75 (m, 1 H,

one proton of CH<sub>2</sub>), 2.60-2.45 (m, 1 H, one proton of CH<sub>2</sub>), 2.43 (s, 3 H, CH<sub>3</sub>), 2.41-2.24 (m, 2 H, CH<sub>2</sub>), 2.24-2.05 (m, 1 H, one proton of CH<sub>2</sub>), 1.98-1.80 (m, 1 H, one proton of CH<sub>2</sub>); <sup>13</sup>C NMR (75 MHz, CDCl<sub>3</sub>) δ 143.7, 140.3, 139.4, 138.3, 137.3, 136.1, 134.9, 133.9, 129.8, 128.7, 127.8, 127.7, 127.2, 121.5, 83.4, 73.0, 72.5, 53.3, 39.1, 36.8, 35.3, 26.3, 21.5; IR (KBr) ν (cm<sup>-1</sup>) 2952, 2926, 2852, 1654, 1317, 1598, 1560, 1466, 1450, 1345, 1161, 1130, 1096, 1065; MS (EI): *m/z* (%) 289 ((M-Ts-I)<sup>+</sup>, 1.79), 258 (100); Anal. Calcd. for C<sub>27</sub>H<sub>26</sub>INO<sub>3</sub>S (%): C 56.75, H 4.59, N 2.45, Found: C 56.99, H 4.89, N 2.12.

### 3. Synthesis of 7-phenyl-4-(propen-2-yl)-1,3-dihydroisobenzofuran-5-carbaldehyde (**10ab**).<sup>8</sup> (zyc-2-34)

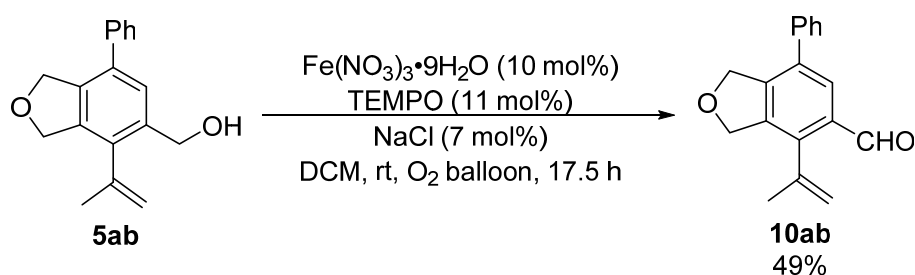

To a dry Schlenk tube were added Fe(NO<sub>3</sub>)<sub>3</sub>•9H<sub>2</sub>O (16.8 mg, 0.04 mmol), TEMPO (6.9 mg, 0.044 mmol), NaCl (1.6 mg, 0.028 mmol), DCM (2.0 mL), and **5ab** (106.3 mg, 0.4 mmol)/DCM (0.5 mL) sequentially. After being equipped with an O<sub>2</sub> balloon, the reaction was stirred at room temperature for 17.5 hours as monitored by TLC. The resulting reaction mixture was then filtrated through a short column of silica gel eluted with ethyl acetate (10 mL × 3). After evaporation, the residue was purified by chromatography on silica gel to afford **10ab** (51.2 mg, 49%) (eluent: petroleum ether (60-90 °C)/ethyl acetate= 20/1).

**10ab**: solid; m.p. 83.0-83.7 °C (*n*-hexane/DCM); <sup>1</sup>H NMR (300 MHz, CDCl<sub>3</sub>) δ 10.22 (s, 1 H, CHO), 7.93 (s, 1 H, ArH), 7.52-7.36 (m, 5 H, ArH), 5.52-5.44 (m, 1 H, one proton of =CH<sub>2</sub>), 5.29-5.23 (m, 2 H, OCH<sub>2</sub>), 5.19-5.13 (m, 2 H, OCH<sub>2</sub>), 5.07-4.98 (m, 1 H, one proton of =CH<sub>2</sub>), 2.13 (t, *J* = 1.2 Hz, 3 H, CH<sub>3</sub>); <sup>13</sup>C NMR (75 MHz, CDCl<sub>3</sub>) δ 191.3, 143.3, 140.1, 140.0, 139.0, 138.5, 135.2, 133.2, 128.8, 127.9, 127.8, 127.7, 118.3, 73.8, 72.6, 24.4; IR (KBr) ν (cm<sup>-1</sup>) 3079, 2965, 2915, 2869, 2837, 2754, 1685, 1630, 1596, 1560, 1502, 1468, 1450, 1393, 1384, 1332, 1313, 1294, 1211, 1178, 1135, 1083, 1057, 1030, 1009; MS (EI): *m/z* (%) 264 (M<sup>+</sup>, 100); Anal. Calcd. for C<sub>18</sub>H<sub>16</sub>O<sub>2</sub> (%): C 81.79, H 6.10, Found: C 81.82, H 6.10.

## References

- [1] X. Huang, W. Wu, C. Fu, Y. Yu, S. Ma, *Chem. Eur. J.* 2015, **21**, 15540.
- [2] S. Song, C. Fu, X. Huang, S. Ma, *Adv. Synth. Catal.* 2018, **360**, 1019.
- [3] N. Haider, J. Kaferbock, *Tetrahedron*, 2004, **60**, 6495.
- [4] N. Haider, T. Kabicher, J. Kaferbock, A. Plenck, *Molecules*, 2007, **12**, 1900.
- [5] X. Dong, R. Sang, Q. Wang, X. Tang, M. Shi, *Chem. Eur. J.* 2013, **19**, 16910.
- [6] B. Bradshaw, P. Evans, J. Fletcher, A. Lee, P. Mwashimba, D. Oehlrich, E. Thomas, R. Davies, B. Allen, K. Broadley, A. Hamrounic, C. Escargueil, *Org. Biomol. Chem.* 2008, **6**, 2138.
- [7] Y. Morino, I. Hidaka, Y. Oderaotoshi, M. Komatsu and S. Minakata, *Tetrahedron*, 2006, **62**, 12247.
- [8] S. Ma, J. Liu, S. Li, B. Chen, J. Cheng, J. Kuang, Y. Liu, B. Wan, Y. Wang, J. Ye, Q. Yu, W. Yuan, S. Yu, *Adv. Synth. Catal.*, 2011, **353**, 1005.

wwt-2-35

2015-09-06 15:08:49.640

USER: nmf

SOLVENT: CDCl<sub>3</sub>

Experiment = zg30

Pulse length = 14.000 usec

Relaxation delay = 1.000 sec

NA = 8

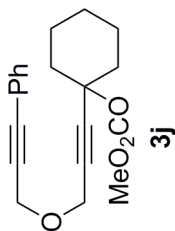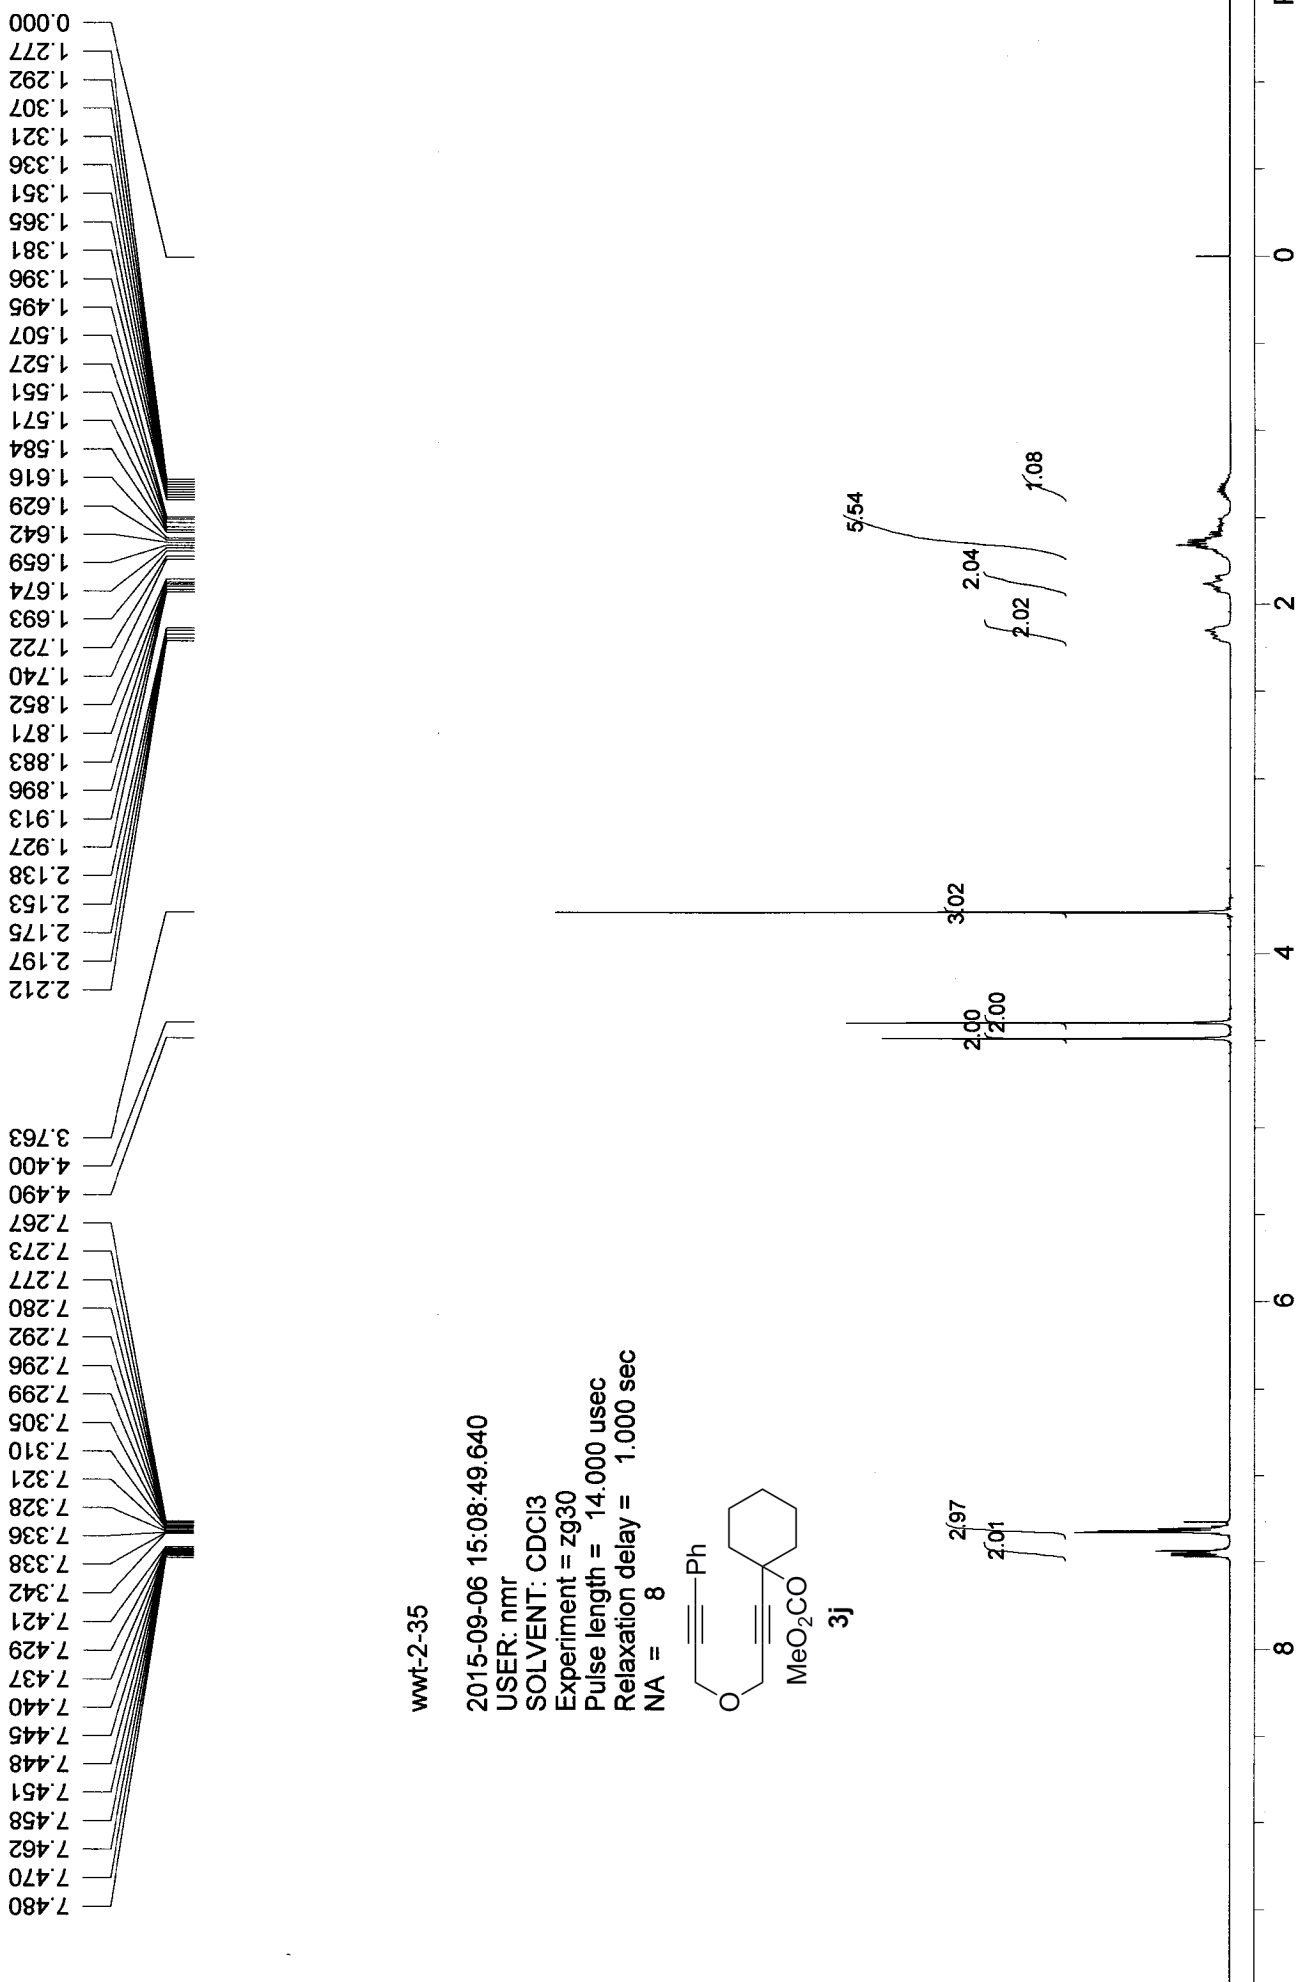

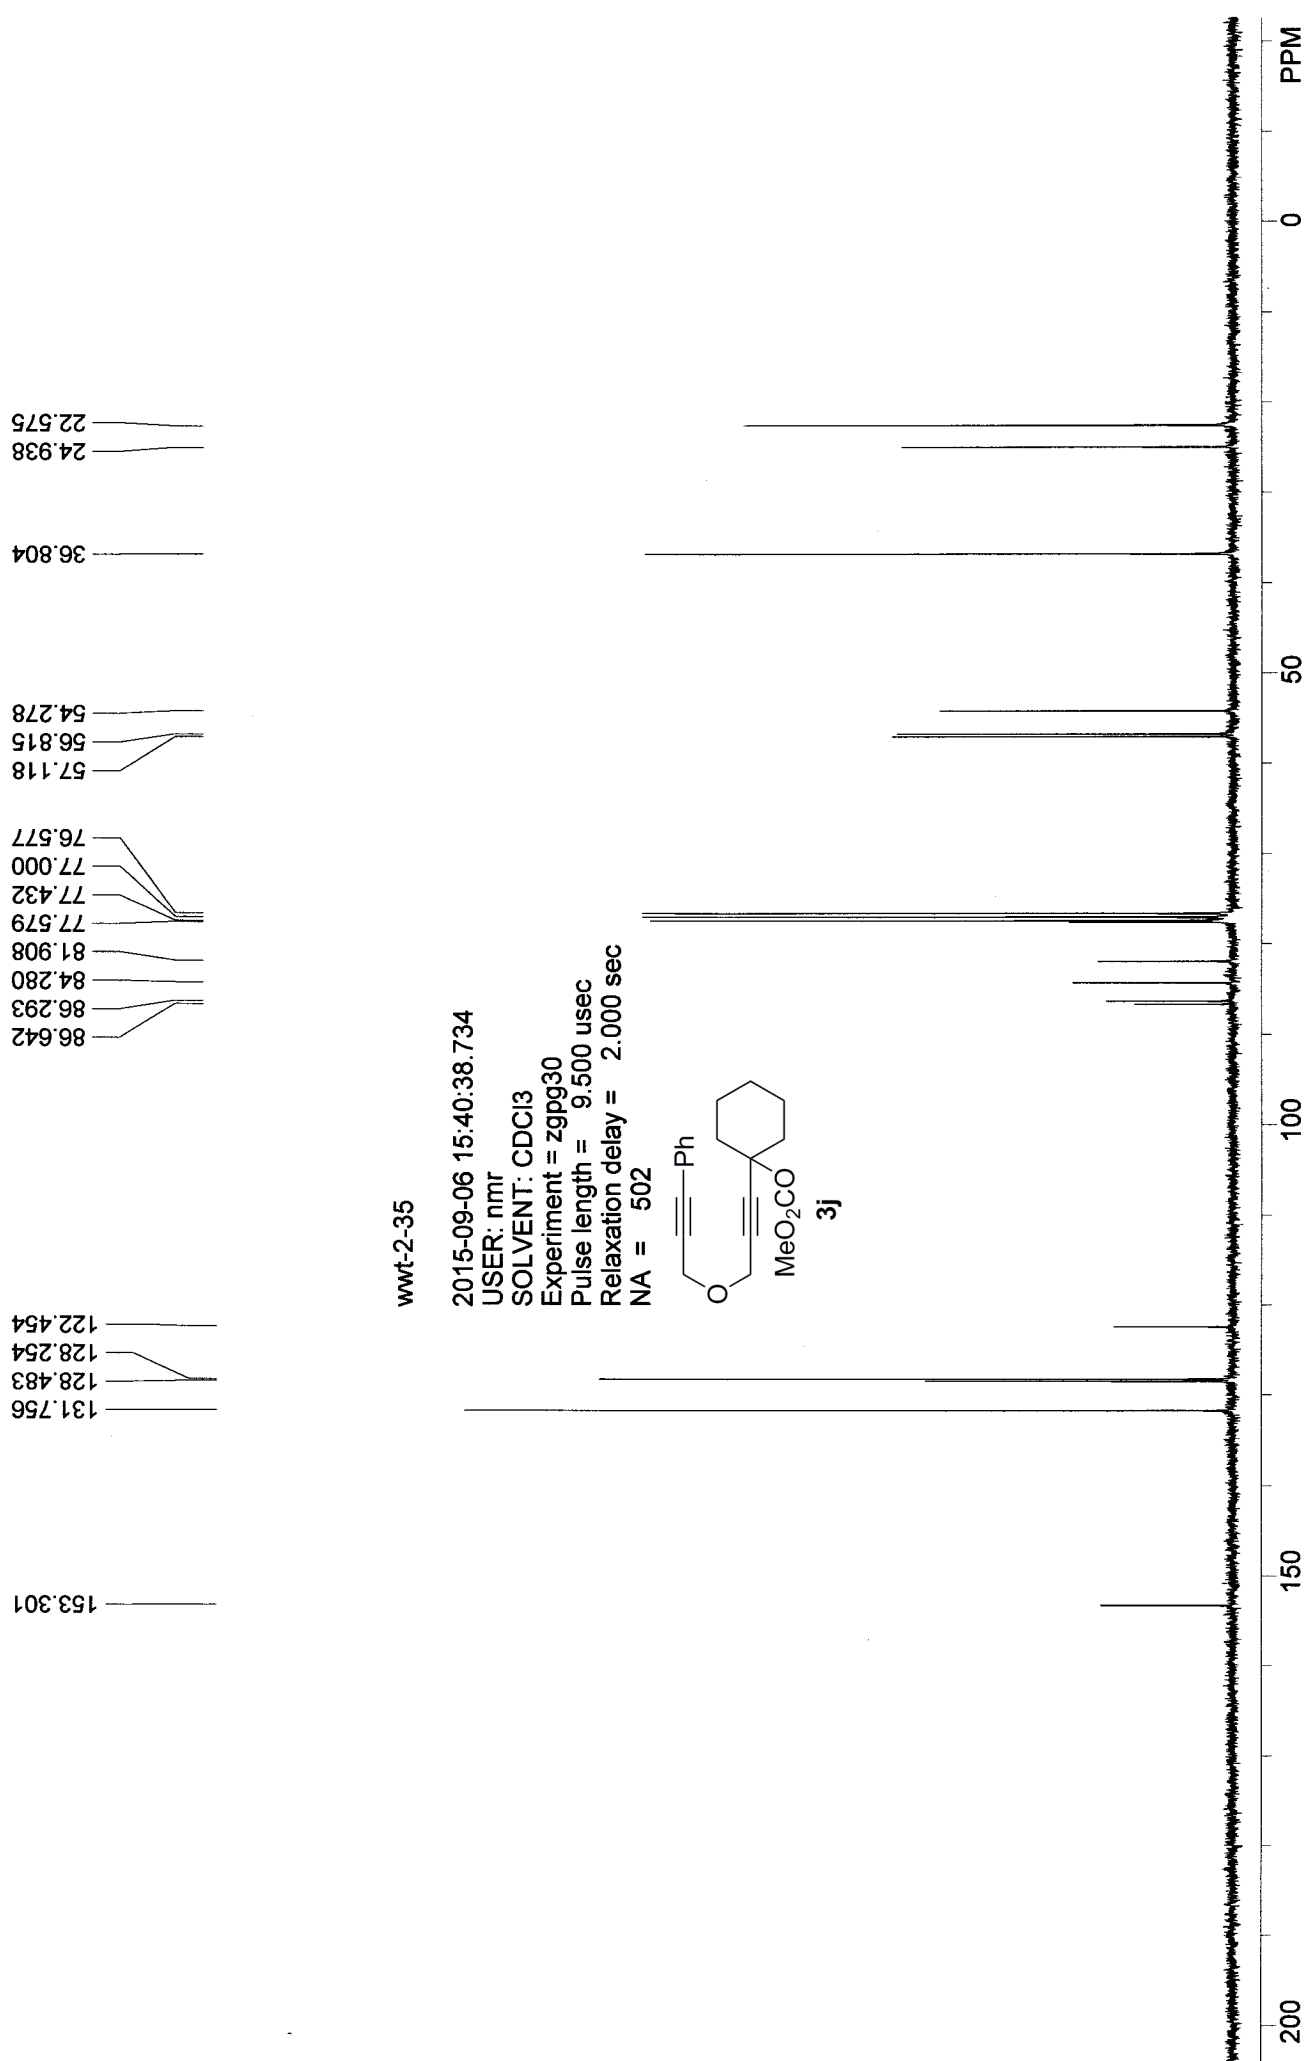

2018-11-21 14:02:45.312  
 zyc-3-26  
 SOLVENT: CDCl3  
 Experiment = zg30  
 Pulse length = 14.000 usec  
 Relaxation delay = 1.000 sec  
 NA = 8  
 F1 = 300.130005 MHz  
 F2 = 1.000000 MHz

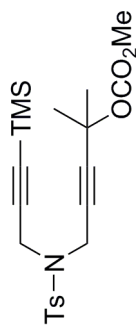

3I

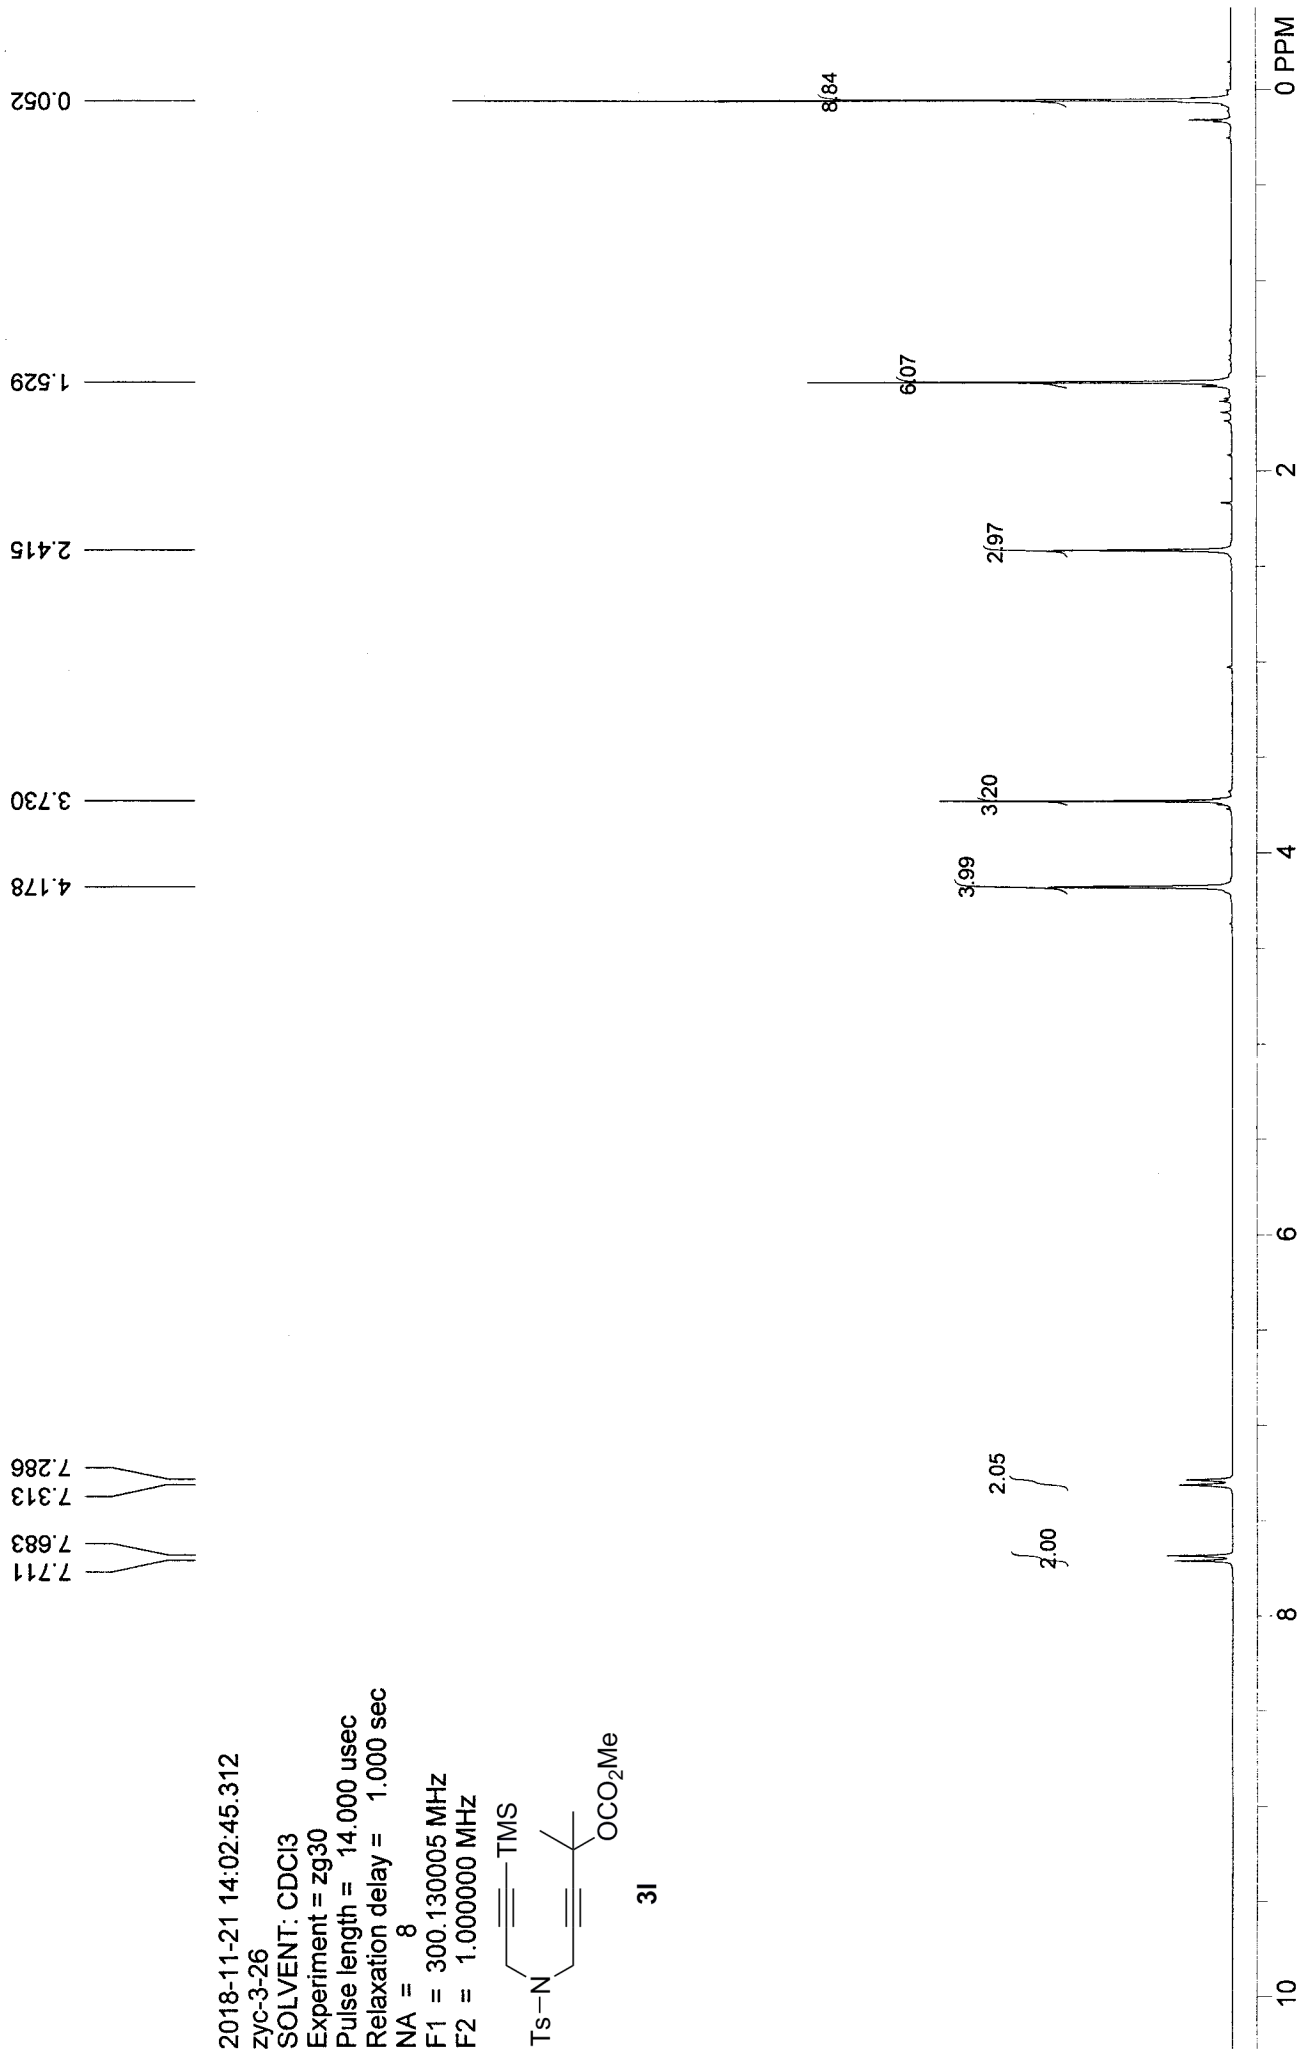



2018-11-23 14:35:53.265  
 zyc-3-26  
 SOLVENT: CDCl<sub>3</sub>  
 Experiment = zgpg30  
 Pulse length = 9.500 usec  
 Relaxation delay = 2.000 sec  
 NA = 200  
 F1 = 75.467751 MHz  
 F2 = 1.000000 MHz

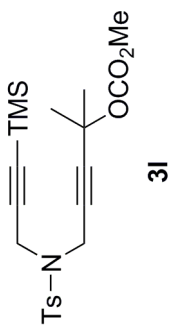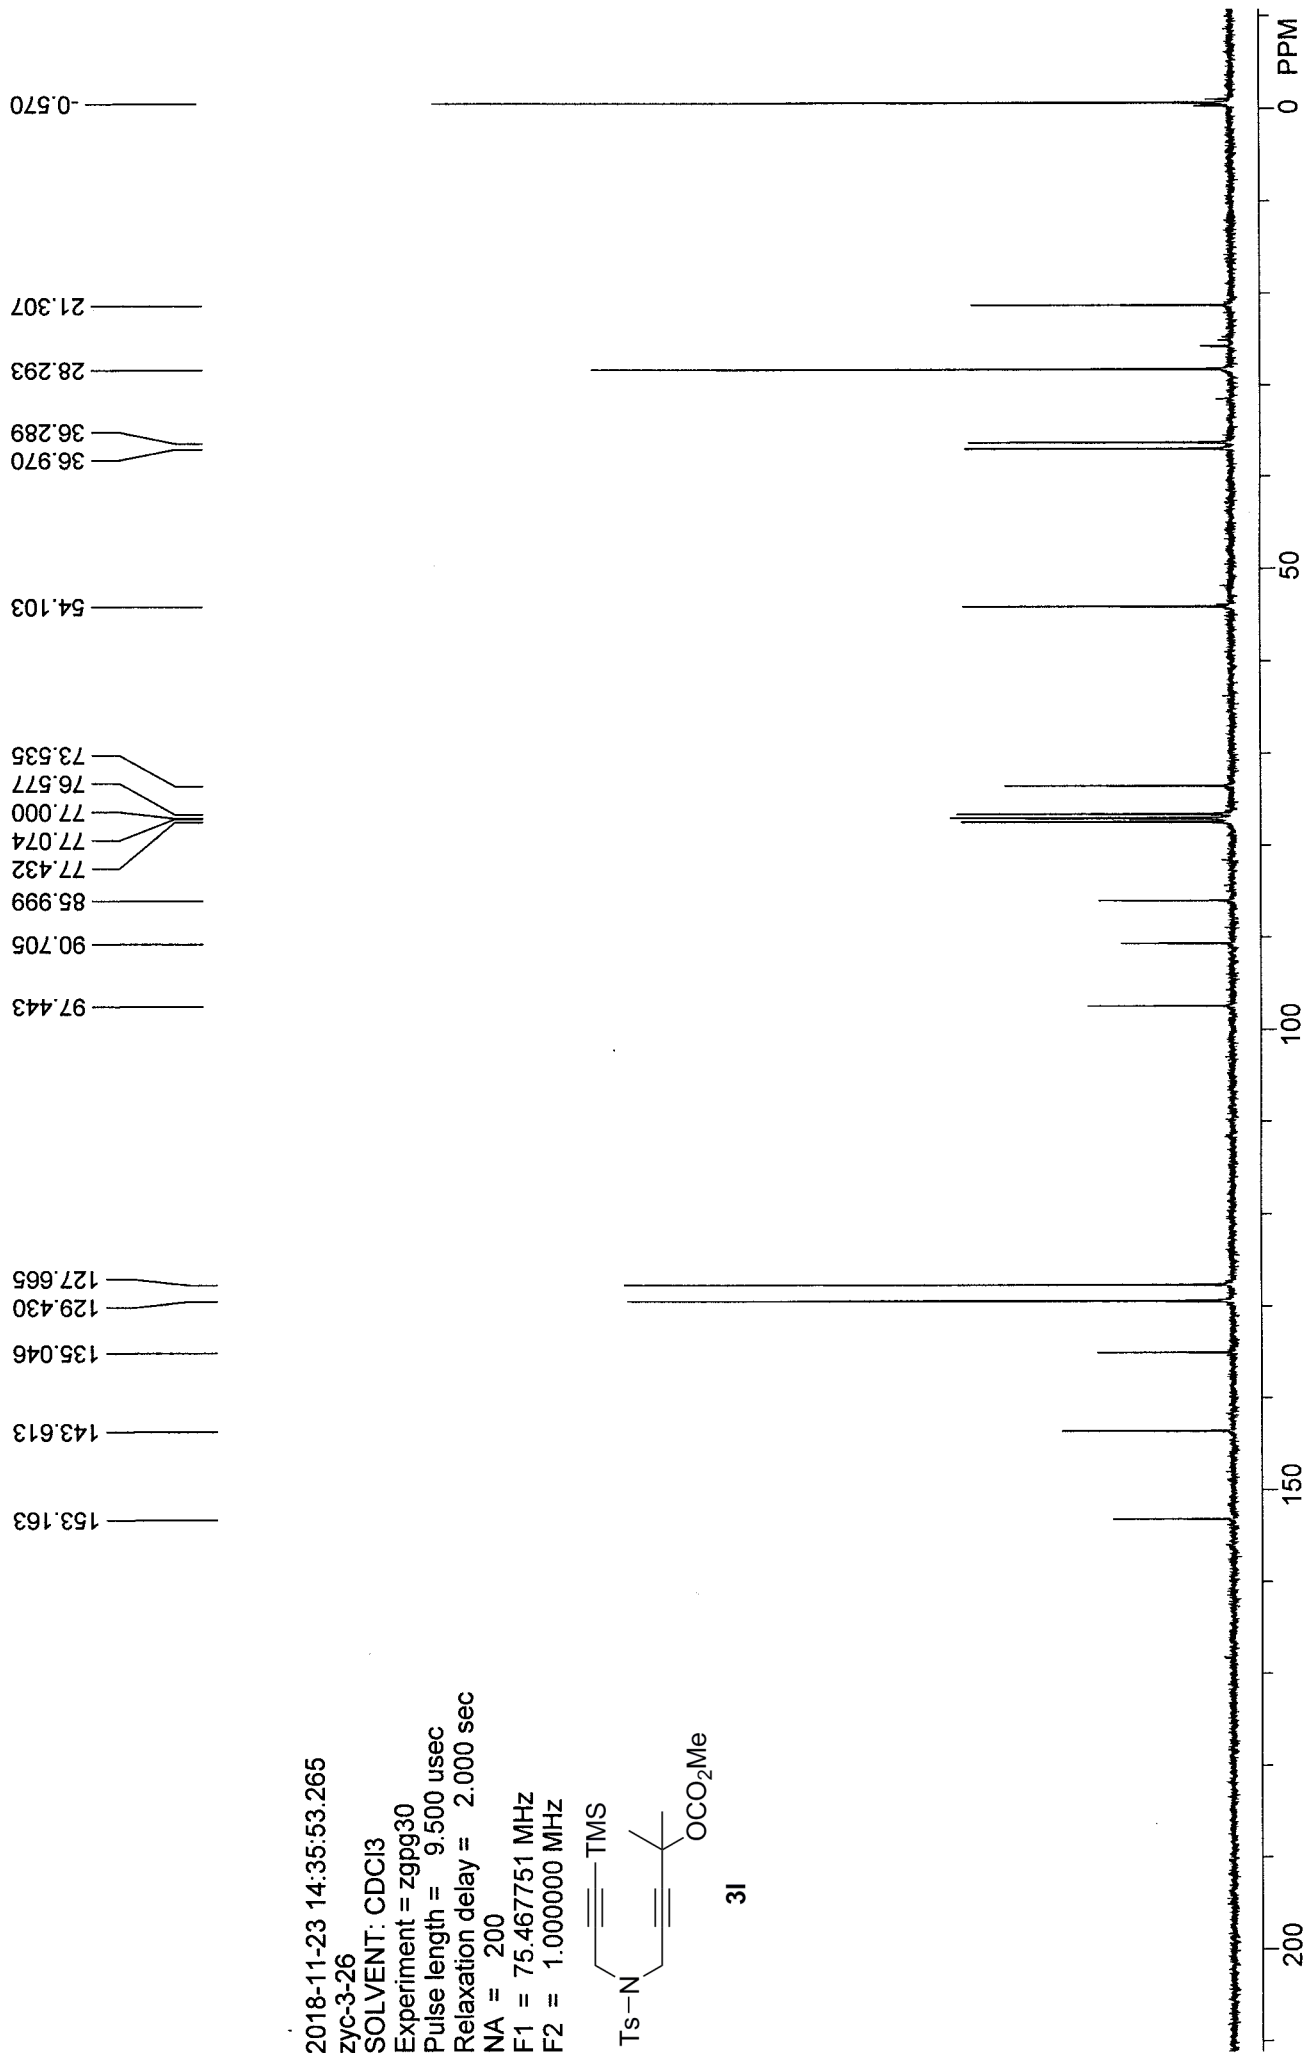

2018-11-21 20:09:26.125

zyc-3-26purity

SOLVENT: CDCl<sub>3</sub>

Experiment = zg30

Pulse length = 14.000 usec

Relaxation delay = 1.000 sec

NA = 8

F1 = 300.130005 MHz

F2 = 1.000000 MHz

Purity (96%) is determined by mesitylene (5  $\mu$ L)  
as the internal standard in 52.2 mg sample

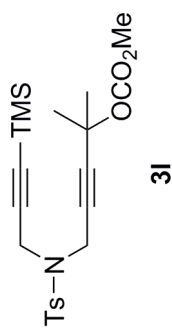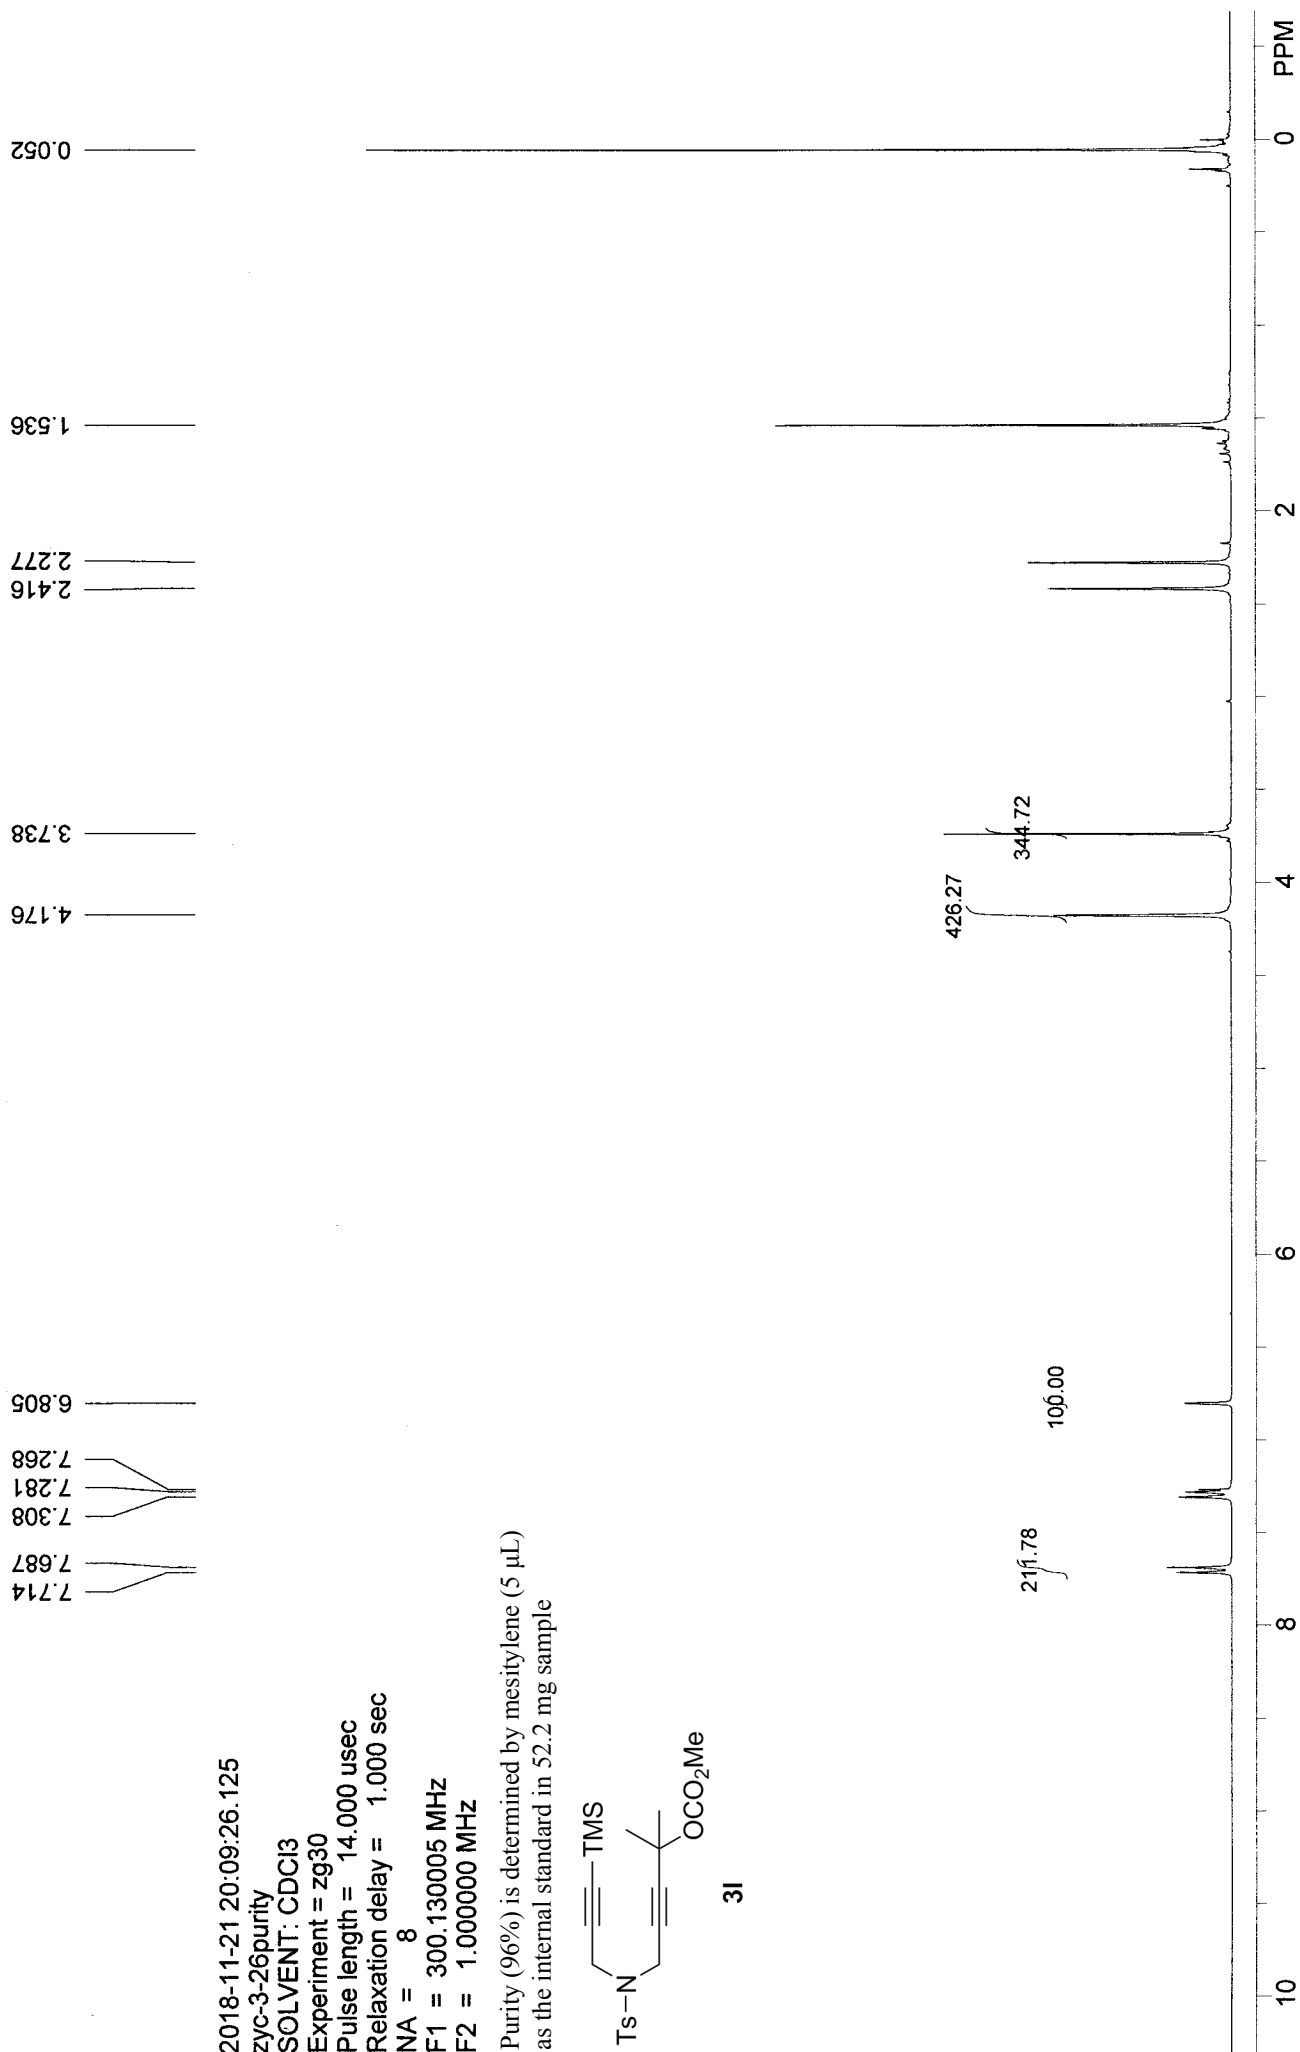

2018-01-22 21:52:54.750

zyc-1-124re

SOLVENT: CDCl<sub>3</sub>

Experiment = zg30

Pulse length = 14.000 usec

Relaxation delay = 1.000 sec

NA = 8

F1 = 300.130005 MHz

F2 = 1.000000 MHz

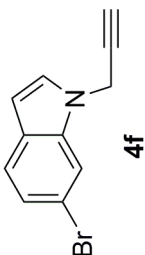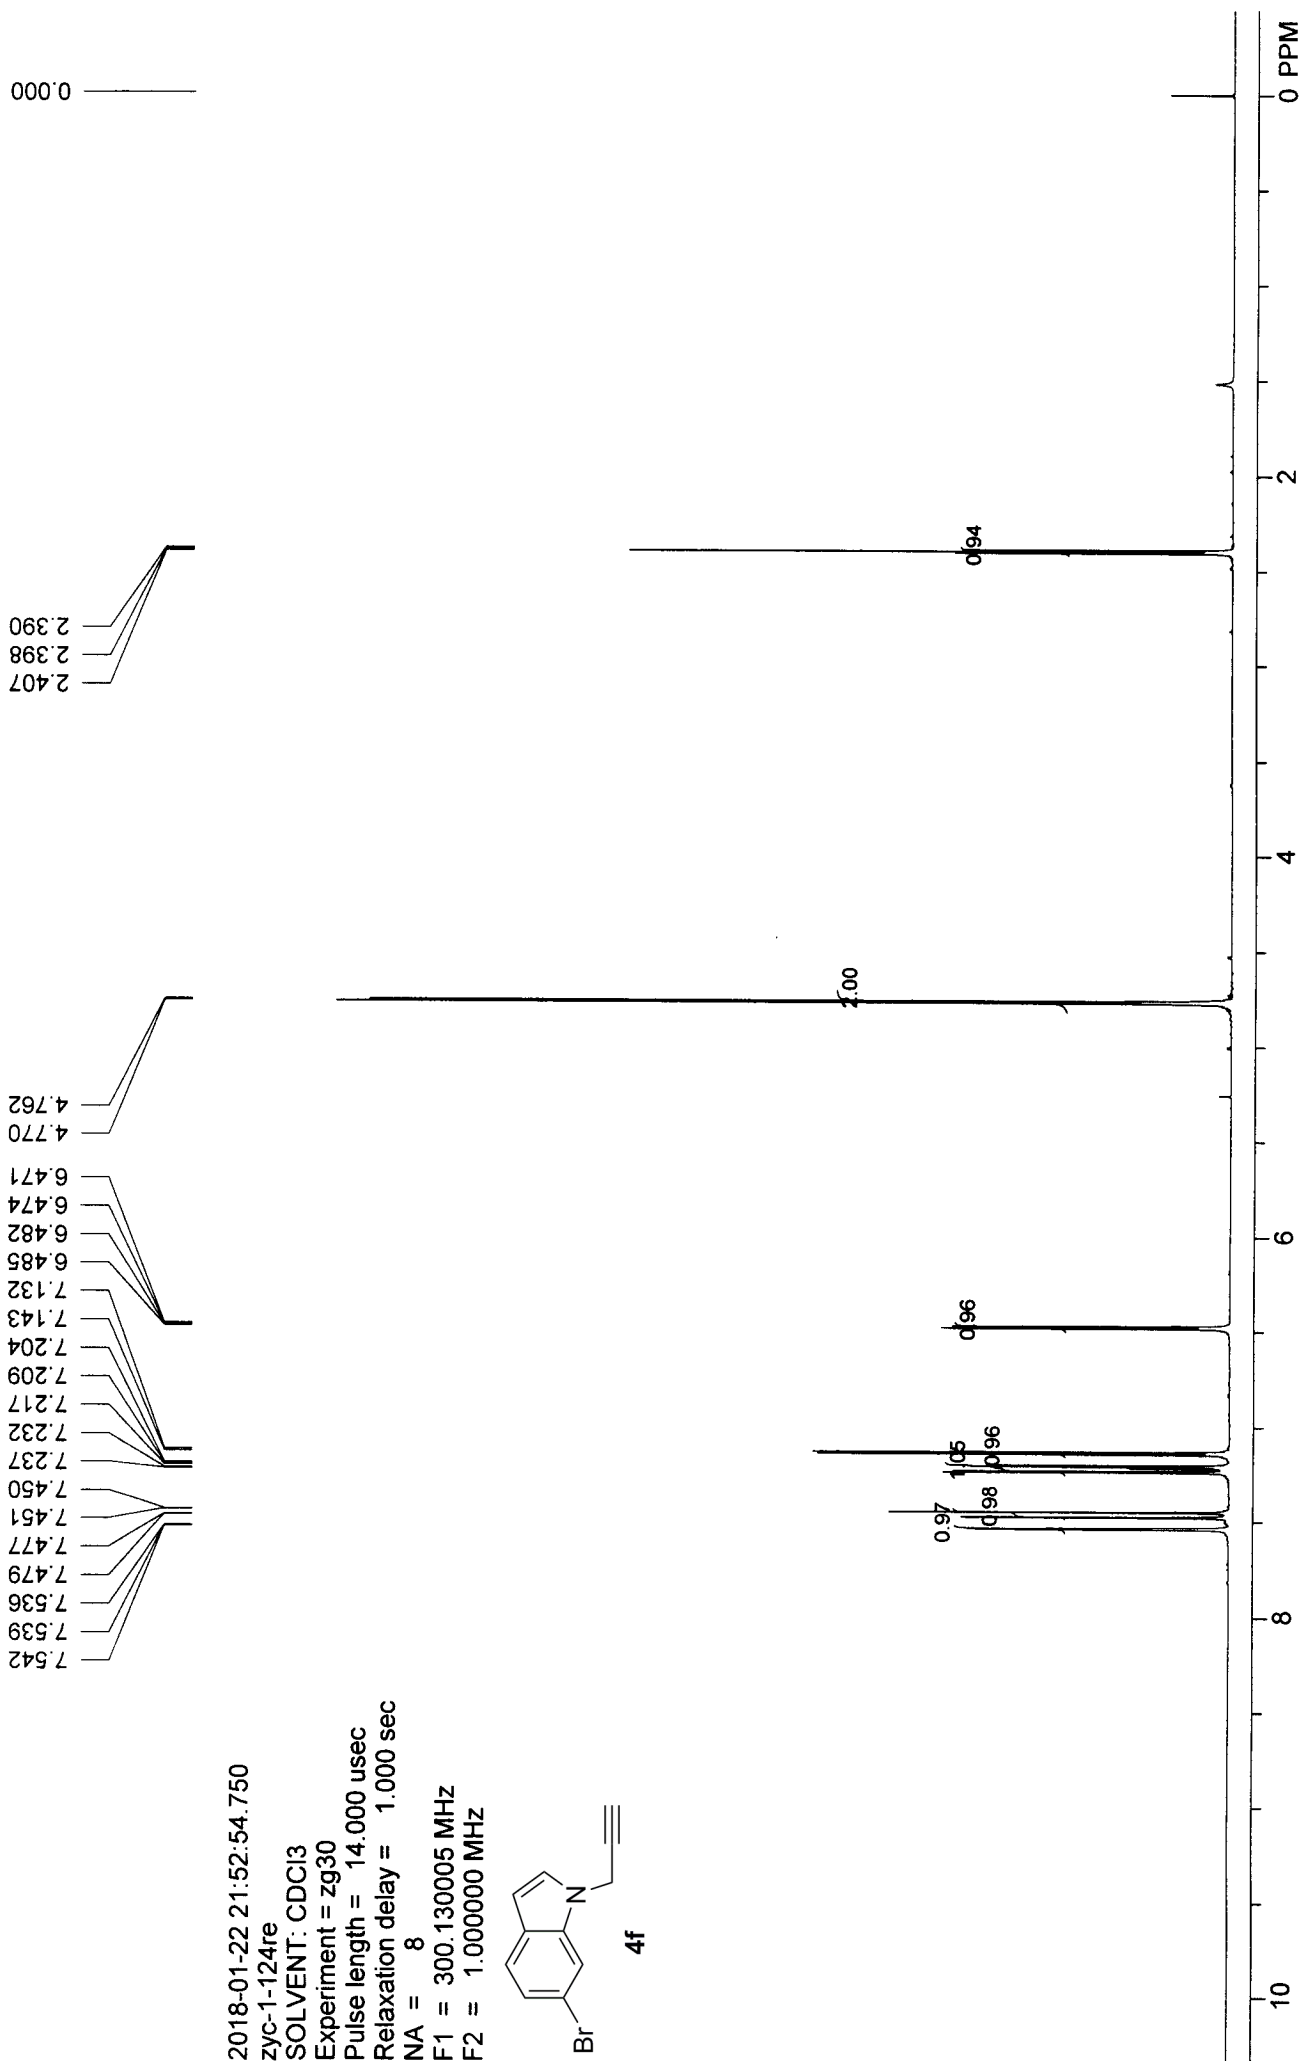

2018-01-22 22:08:11.734  
 zyc-1-124reC  
 SOLVENT: CDCl3  
 Experiment = zgpg30  
 Pulse length = 9.500 usec  
 Relaxation delay = 2.000 sec  
 NA = 229  
 F1 = 75.467751 MHz  
 F2 = 1.000000 MHz

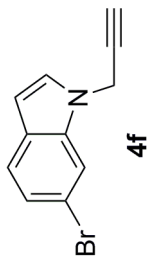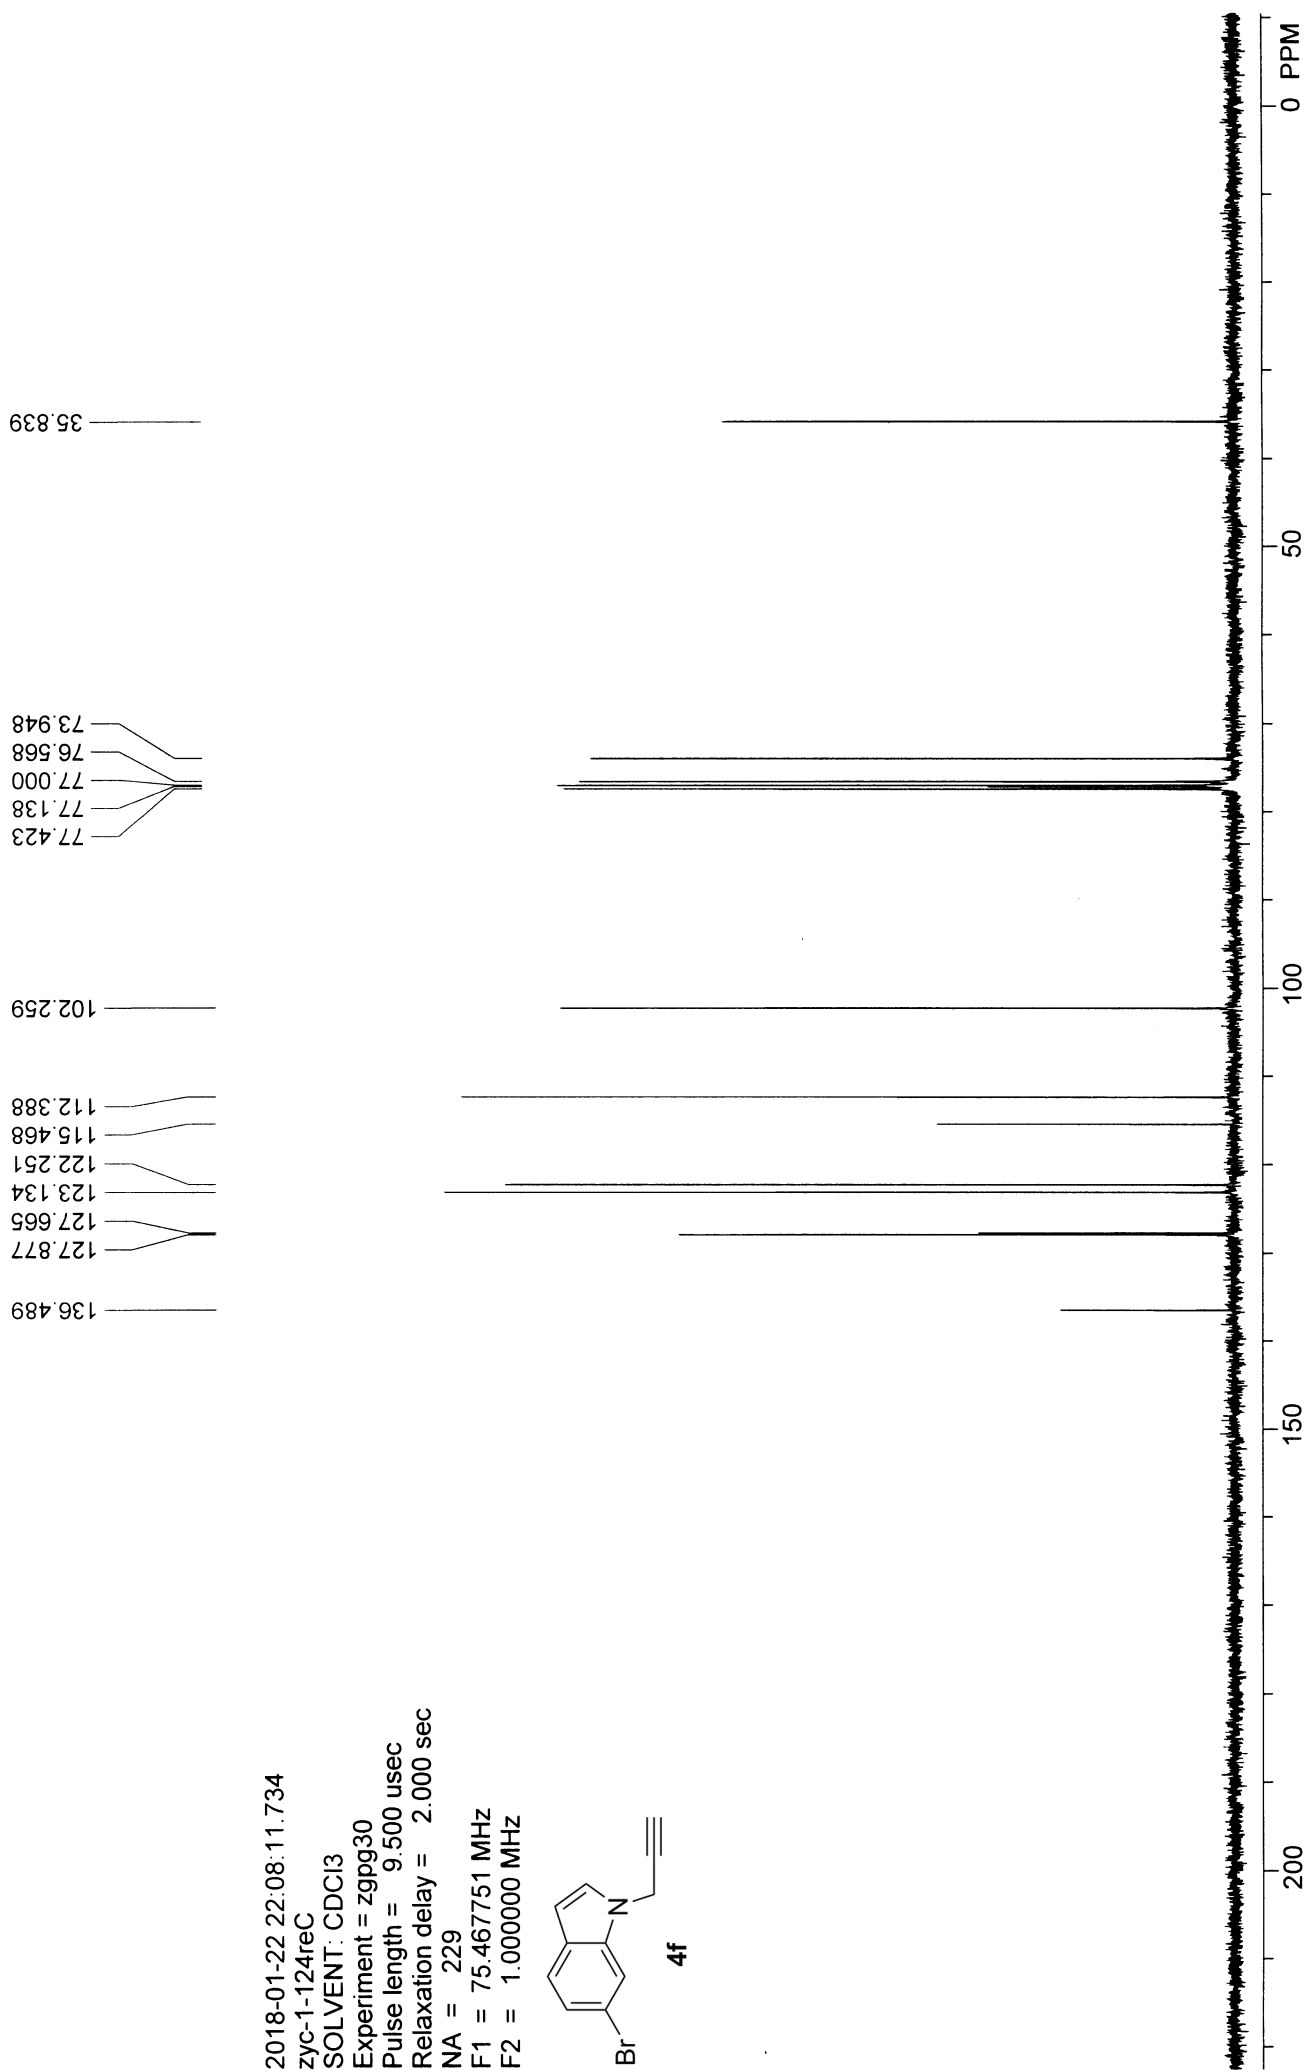

2015-06-20 14:51:37.812

wwf-1-193-4H

SOLVENT: CDCl<sub>3</sub>

Experiment = zg30

Pulse length = 14.000 usec

Relaxation delay = 1.000 sec

NA = 8

F1 = 300.130005 MHz

F2 = 1.000000 MHz

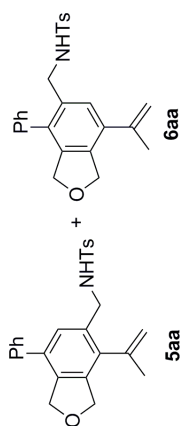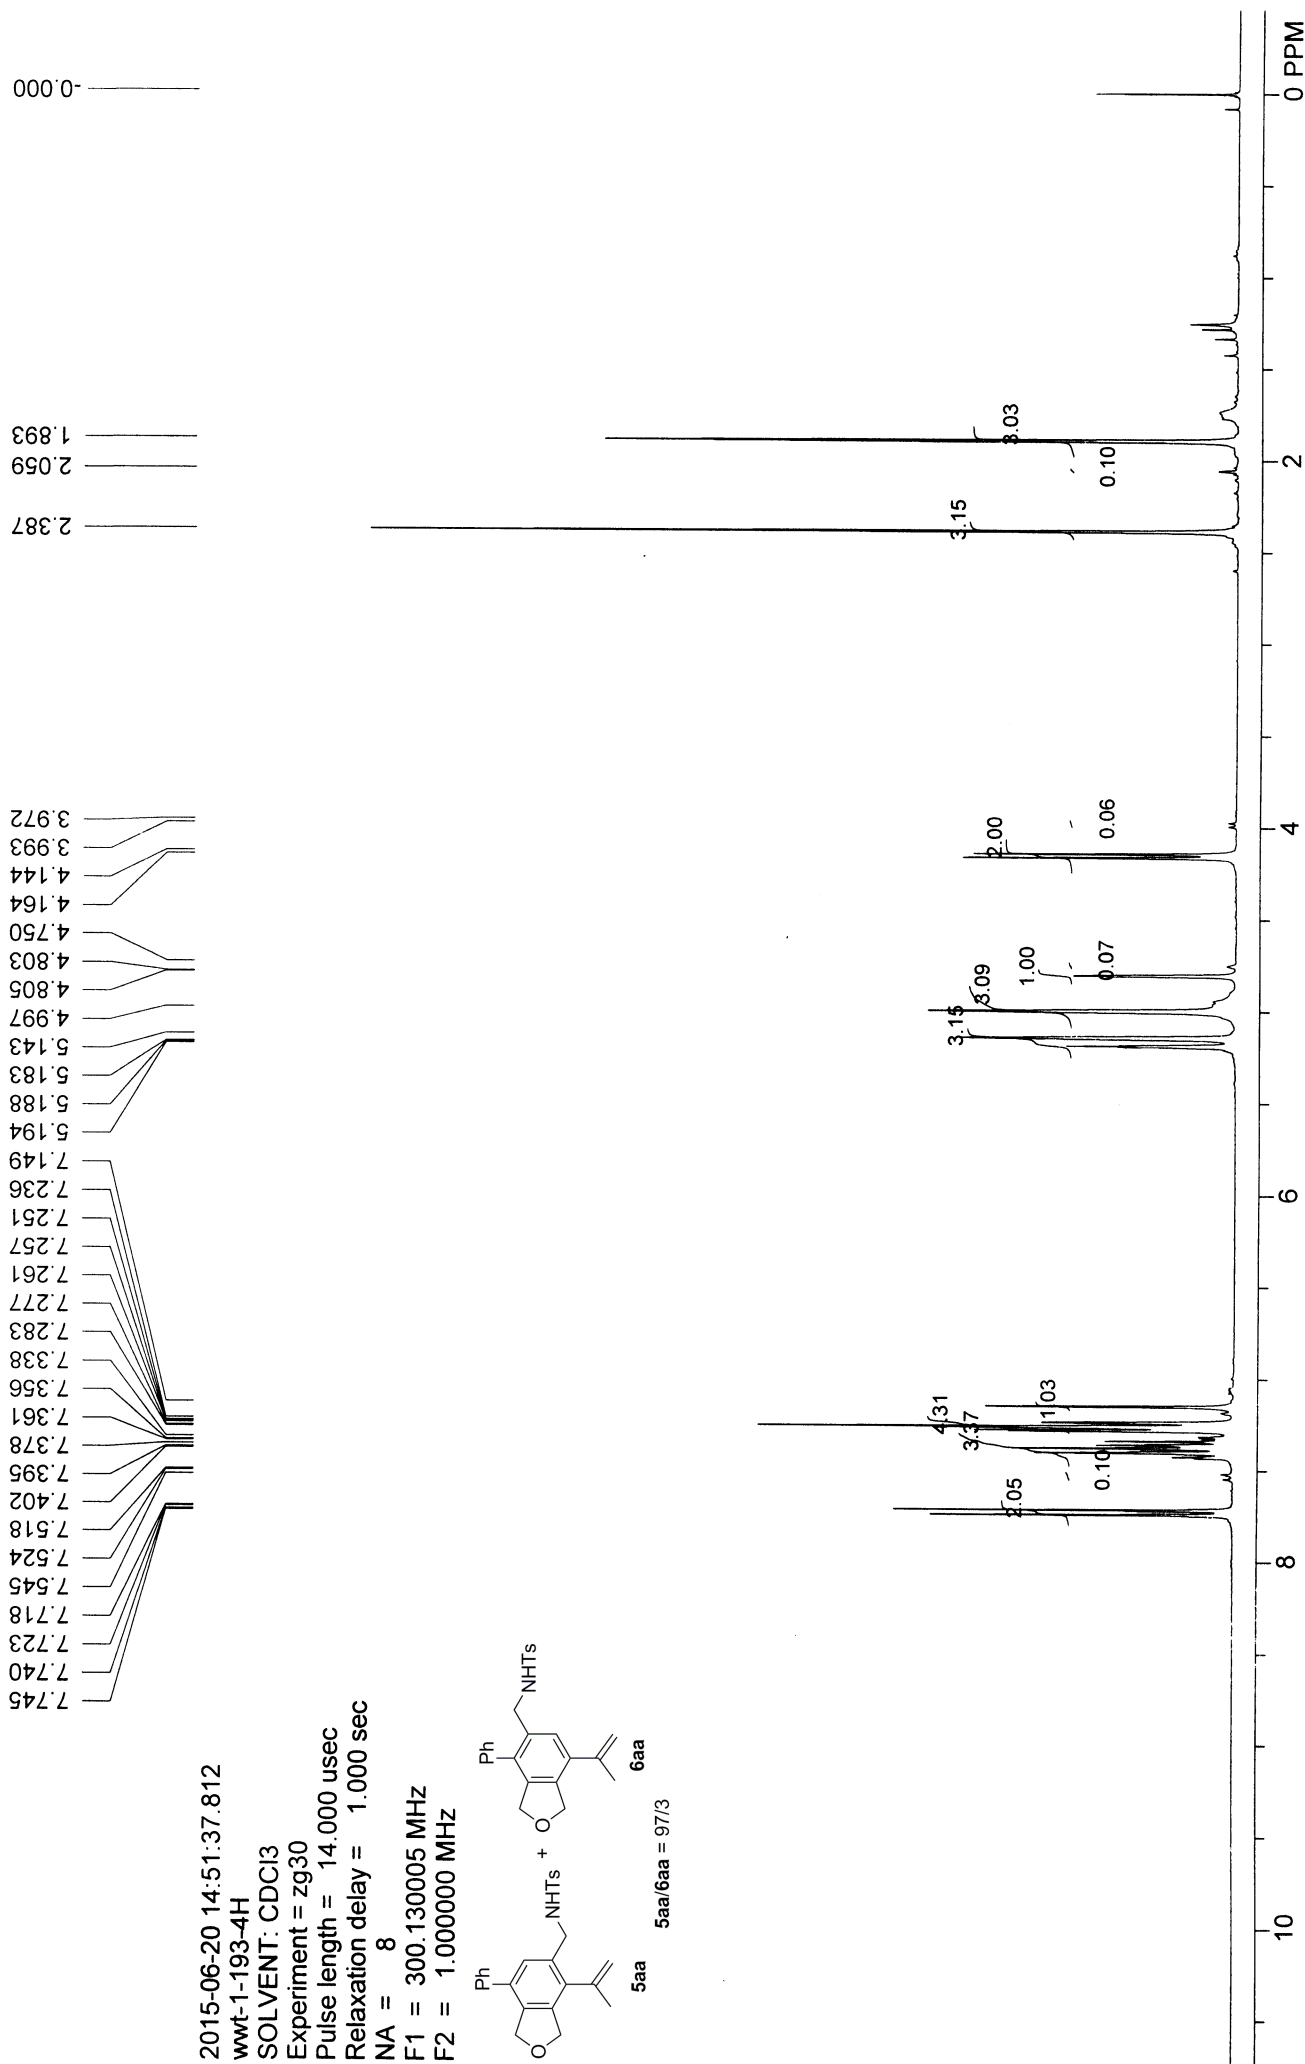

2015-06-20 15:11:42.734  
 wwt-1-193-4C  
 SOLVENT: CDCl<sub>3</sub>  
 Experiment = zgpg30  
 Pulse length = 9.500 usec  
 Relaxation delay = 2.000 sec  
 NA = 305  
 F1 = 75.467751 MHz  
 F2 = 1.000000 MHz

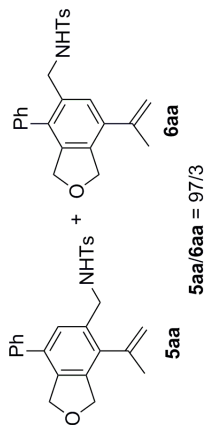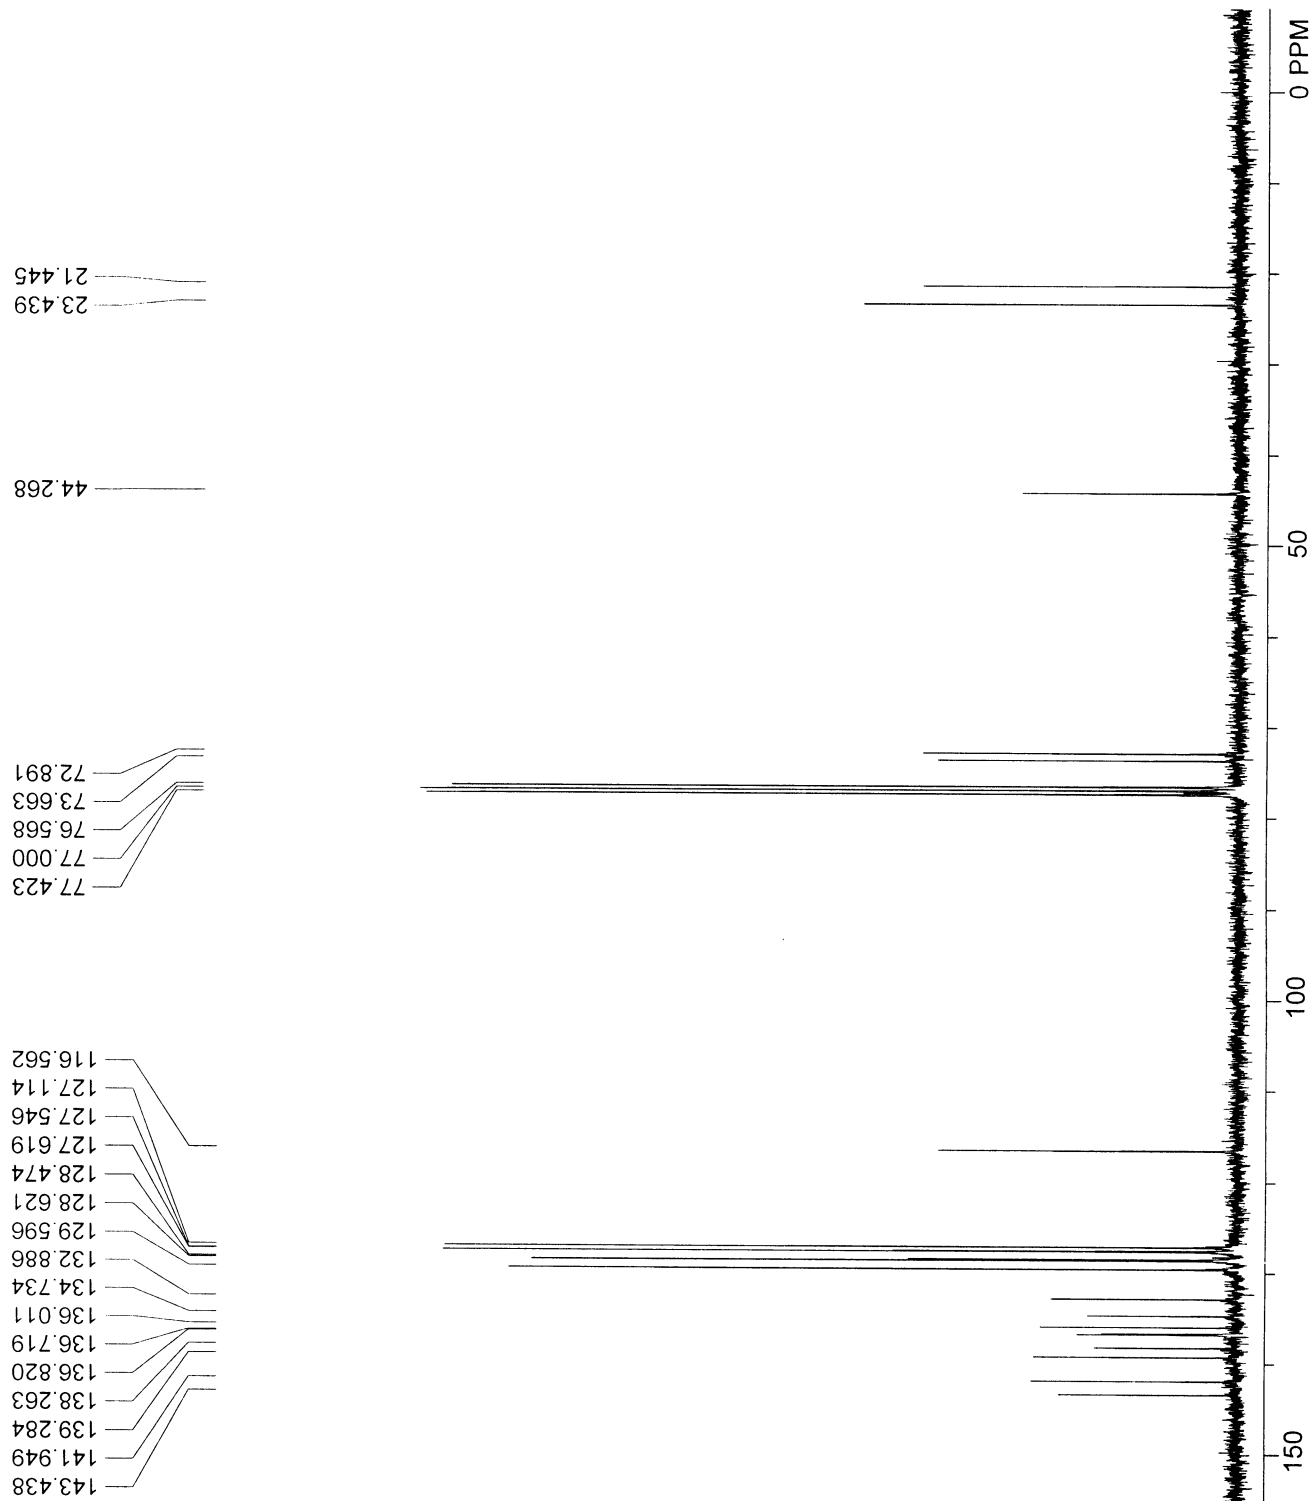

2015-07-14 14:34:17.046

wwt-1-193-4r

SOLVENT: CDCl<sub>3</sub>

Experiment = zg30

Pulse length = 14.000 usec

Relaxation delay = 1.000 sec

NA = 8

F1 = 300.130005 MHz

F2 = 1.000000 MHz

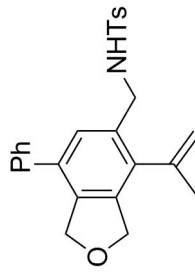

5aa

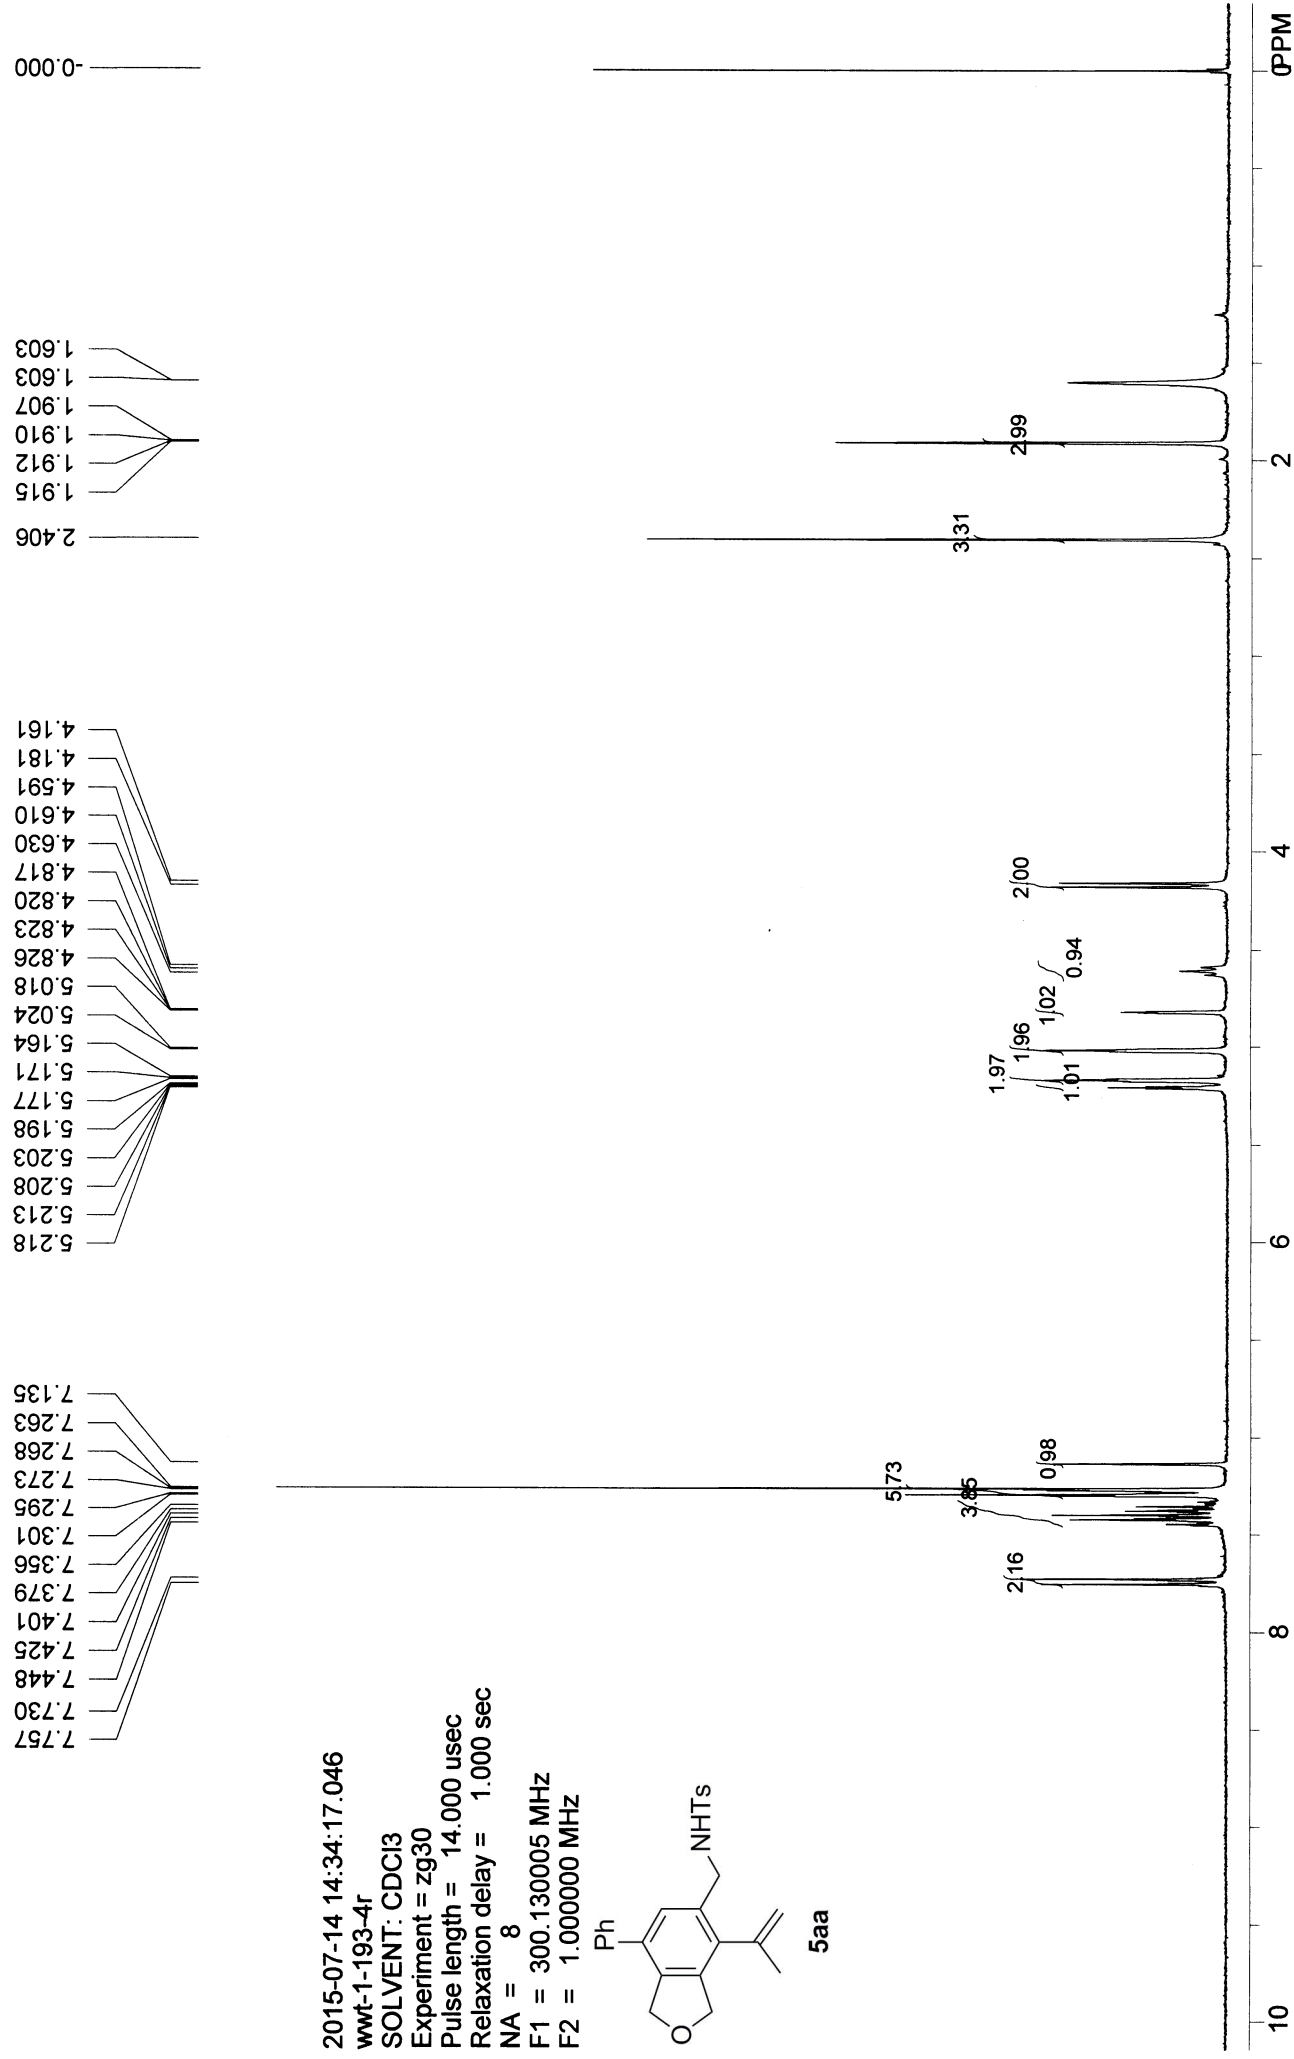

2015-07-13 13:27:21.859  
 wwt-1-193-2  
 SOLVENT: CDCl<sub>3</sub>  
 Experiment = zg30  
 Pulse length = 14.000 usec  
 Relaxation delay = 1.000 sec  
 NA = 8  
 F1 = 300.130005 MHz  
 F2 = 1.000000 MHz

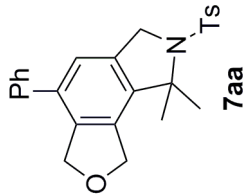

S60

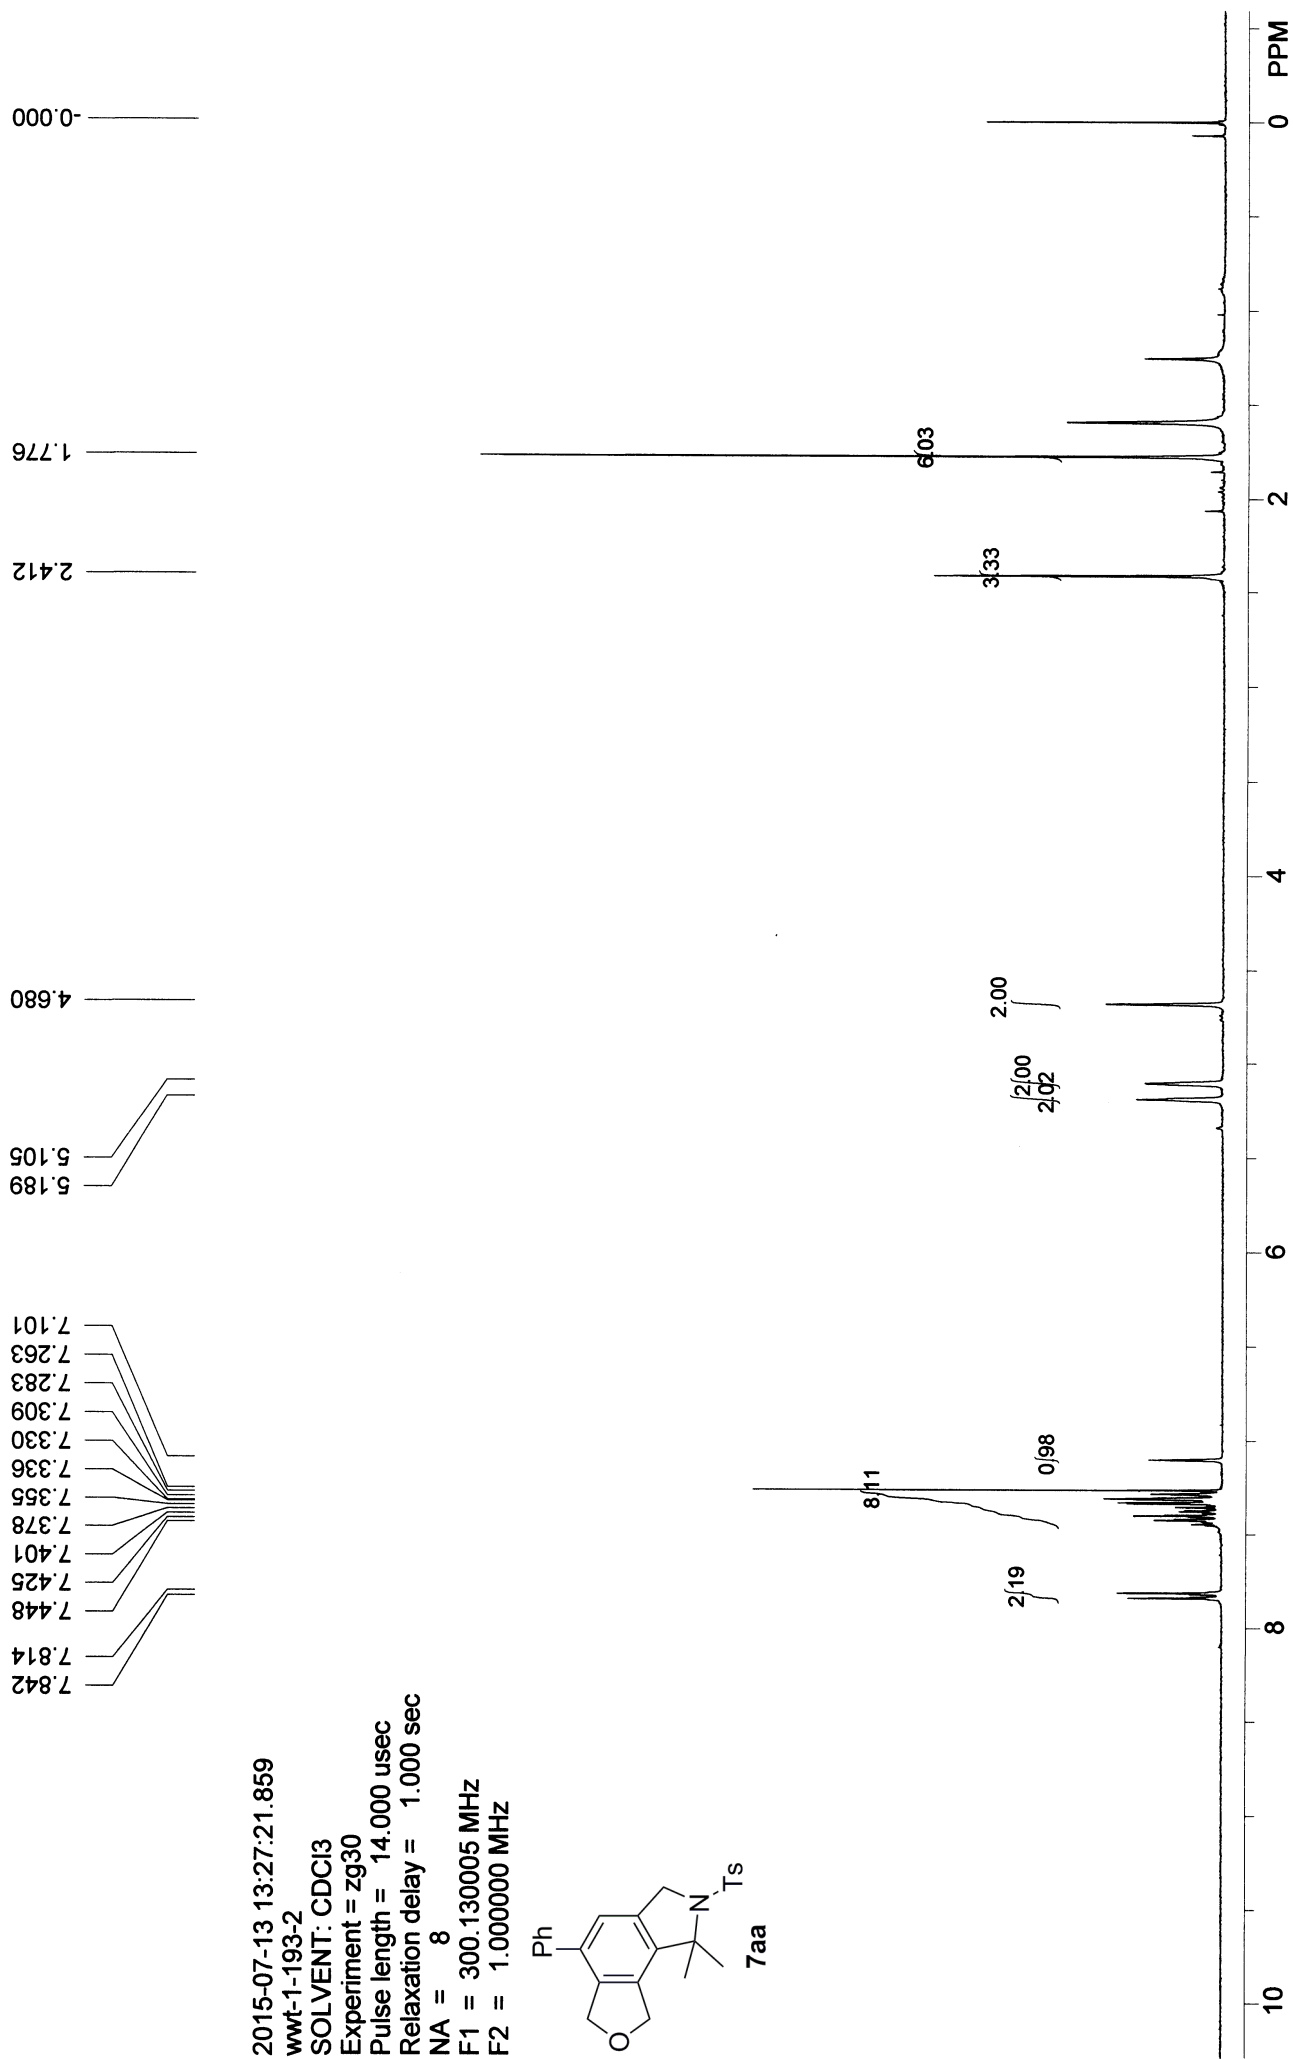



21.454  
27.079

53.065

70.593  
71.154  
72.836  
76.577  
77.000  
77.423

121.847  
127.353  
127.693  
127.766  
128.741  
129.504  
132.951  
133.842  
135.800  
137.896  
138.052  
138.052  
139.219  
139.633  
143.172

wwt-1-193-2

2015-07-09 09:55:49.484

USER: nmr

SOLVENT: CDCl3

Experiment = zgpg30

Pulse length = 9.500 usec

Relaxation delay = 2.000 sec

NA = 11051

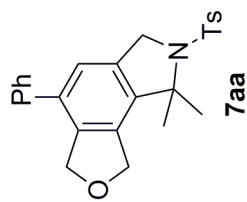

0 PPM 50 100 150 200

2018-03-26 19:34:58.734

ZYC-1-166-2

SOLVENT: CDCl<sub>3</sub>

Experiment = zg30

Pulse length = 14.000 usec

Relaxation delay = 1.000 sec

NA = 8

F1 = 300.130005 MHz

F2 = 1.000000 MHz

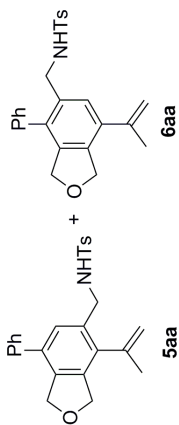

5aa/6aa = 97/3

Gram Scale

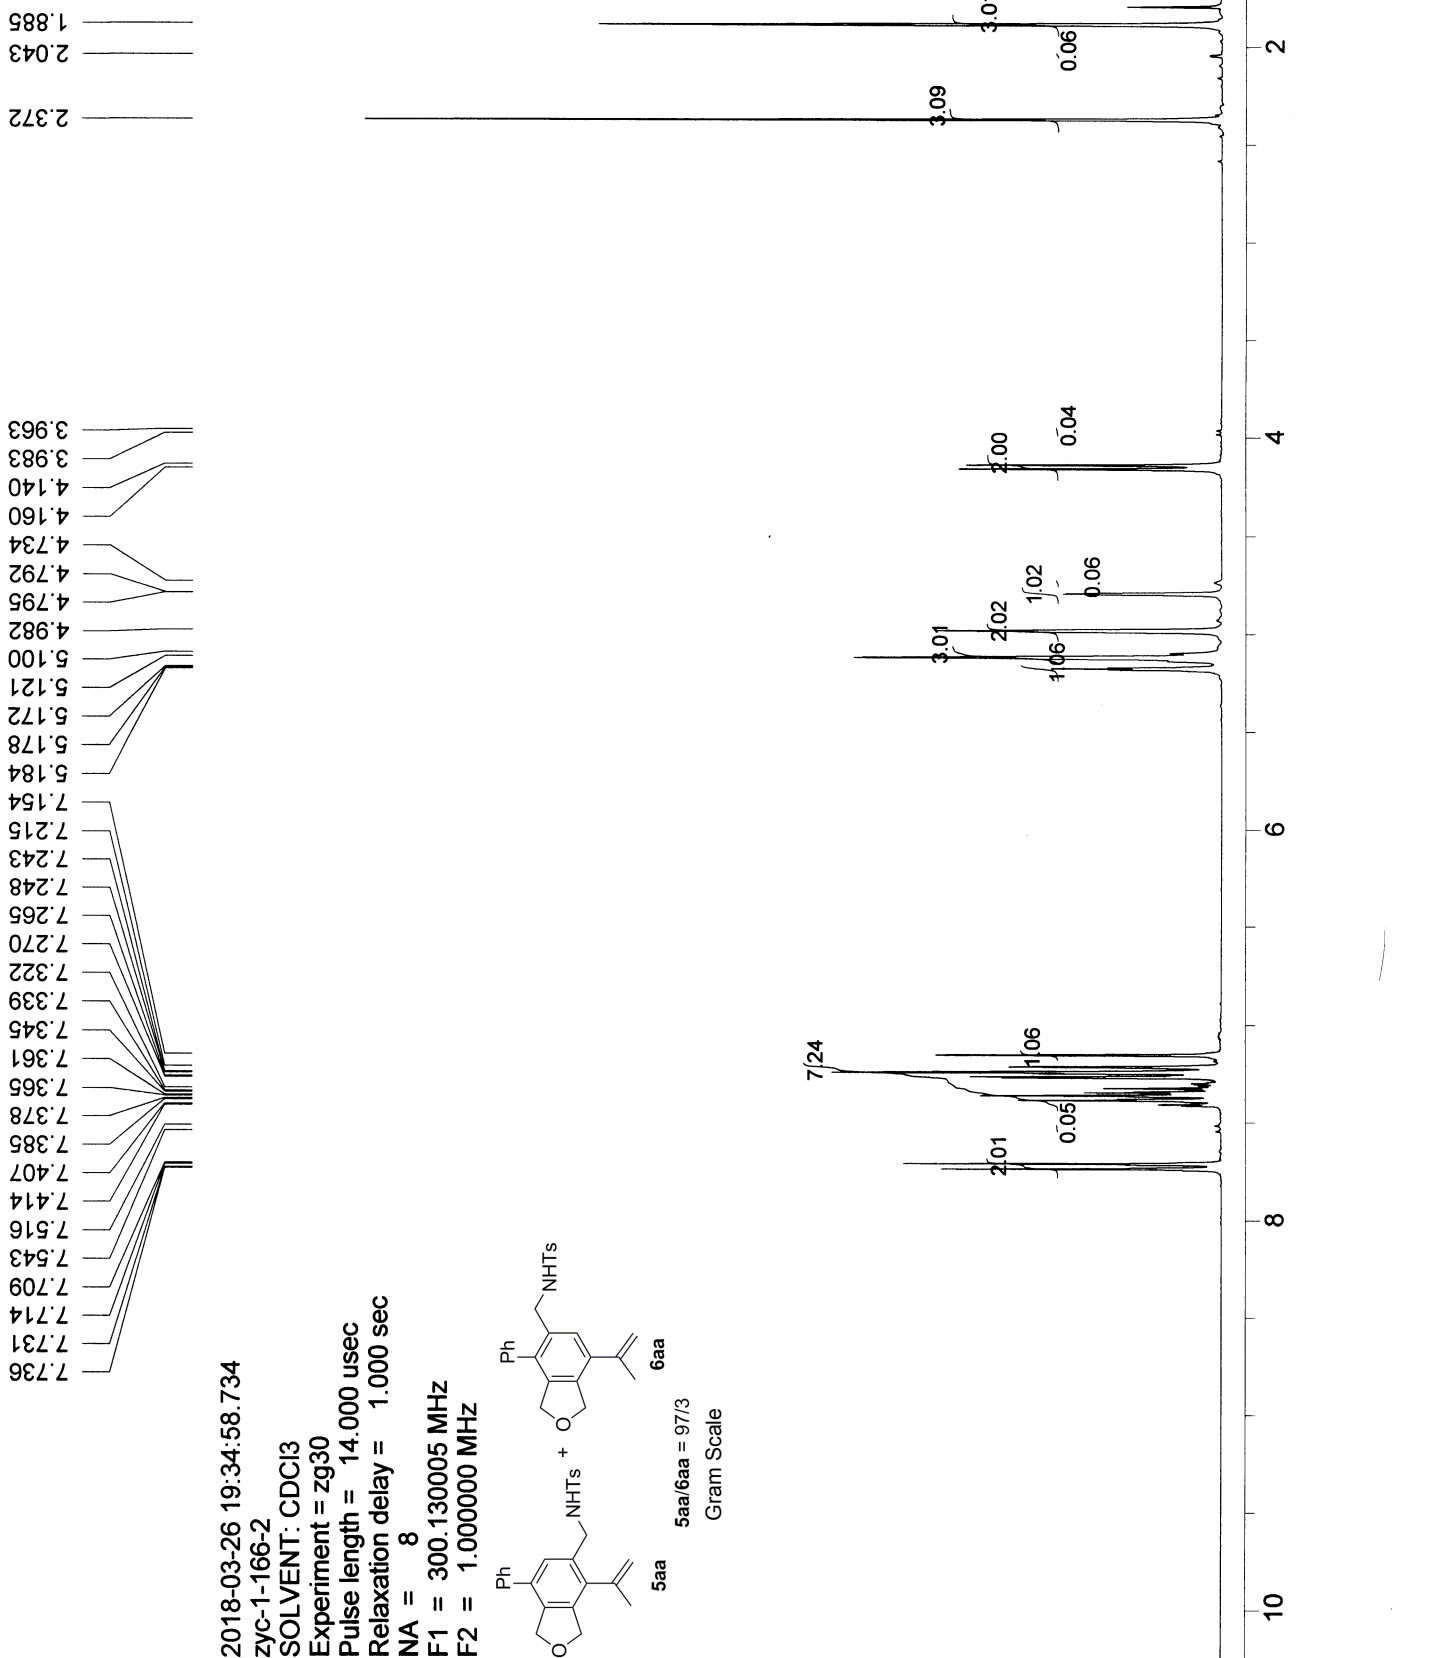

2018-03-26 20:14:33.859

zyc-1-166-2

SOLVENT: CDCl<sub>3</sub>

Experiment = zgpg30

Pulse length = 9.500 usec

Relaxation delay = 2.000 sec

NA = 401

F1 = 75.467751 MHz

F2 = 1.000000 MHz

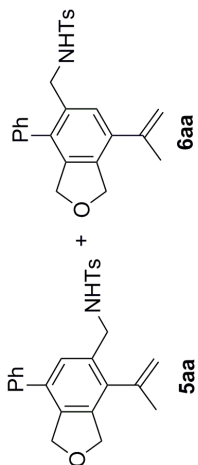

5aa/6aa = 97/3

Gram Scale

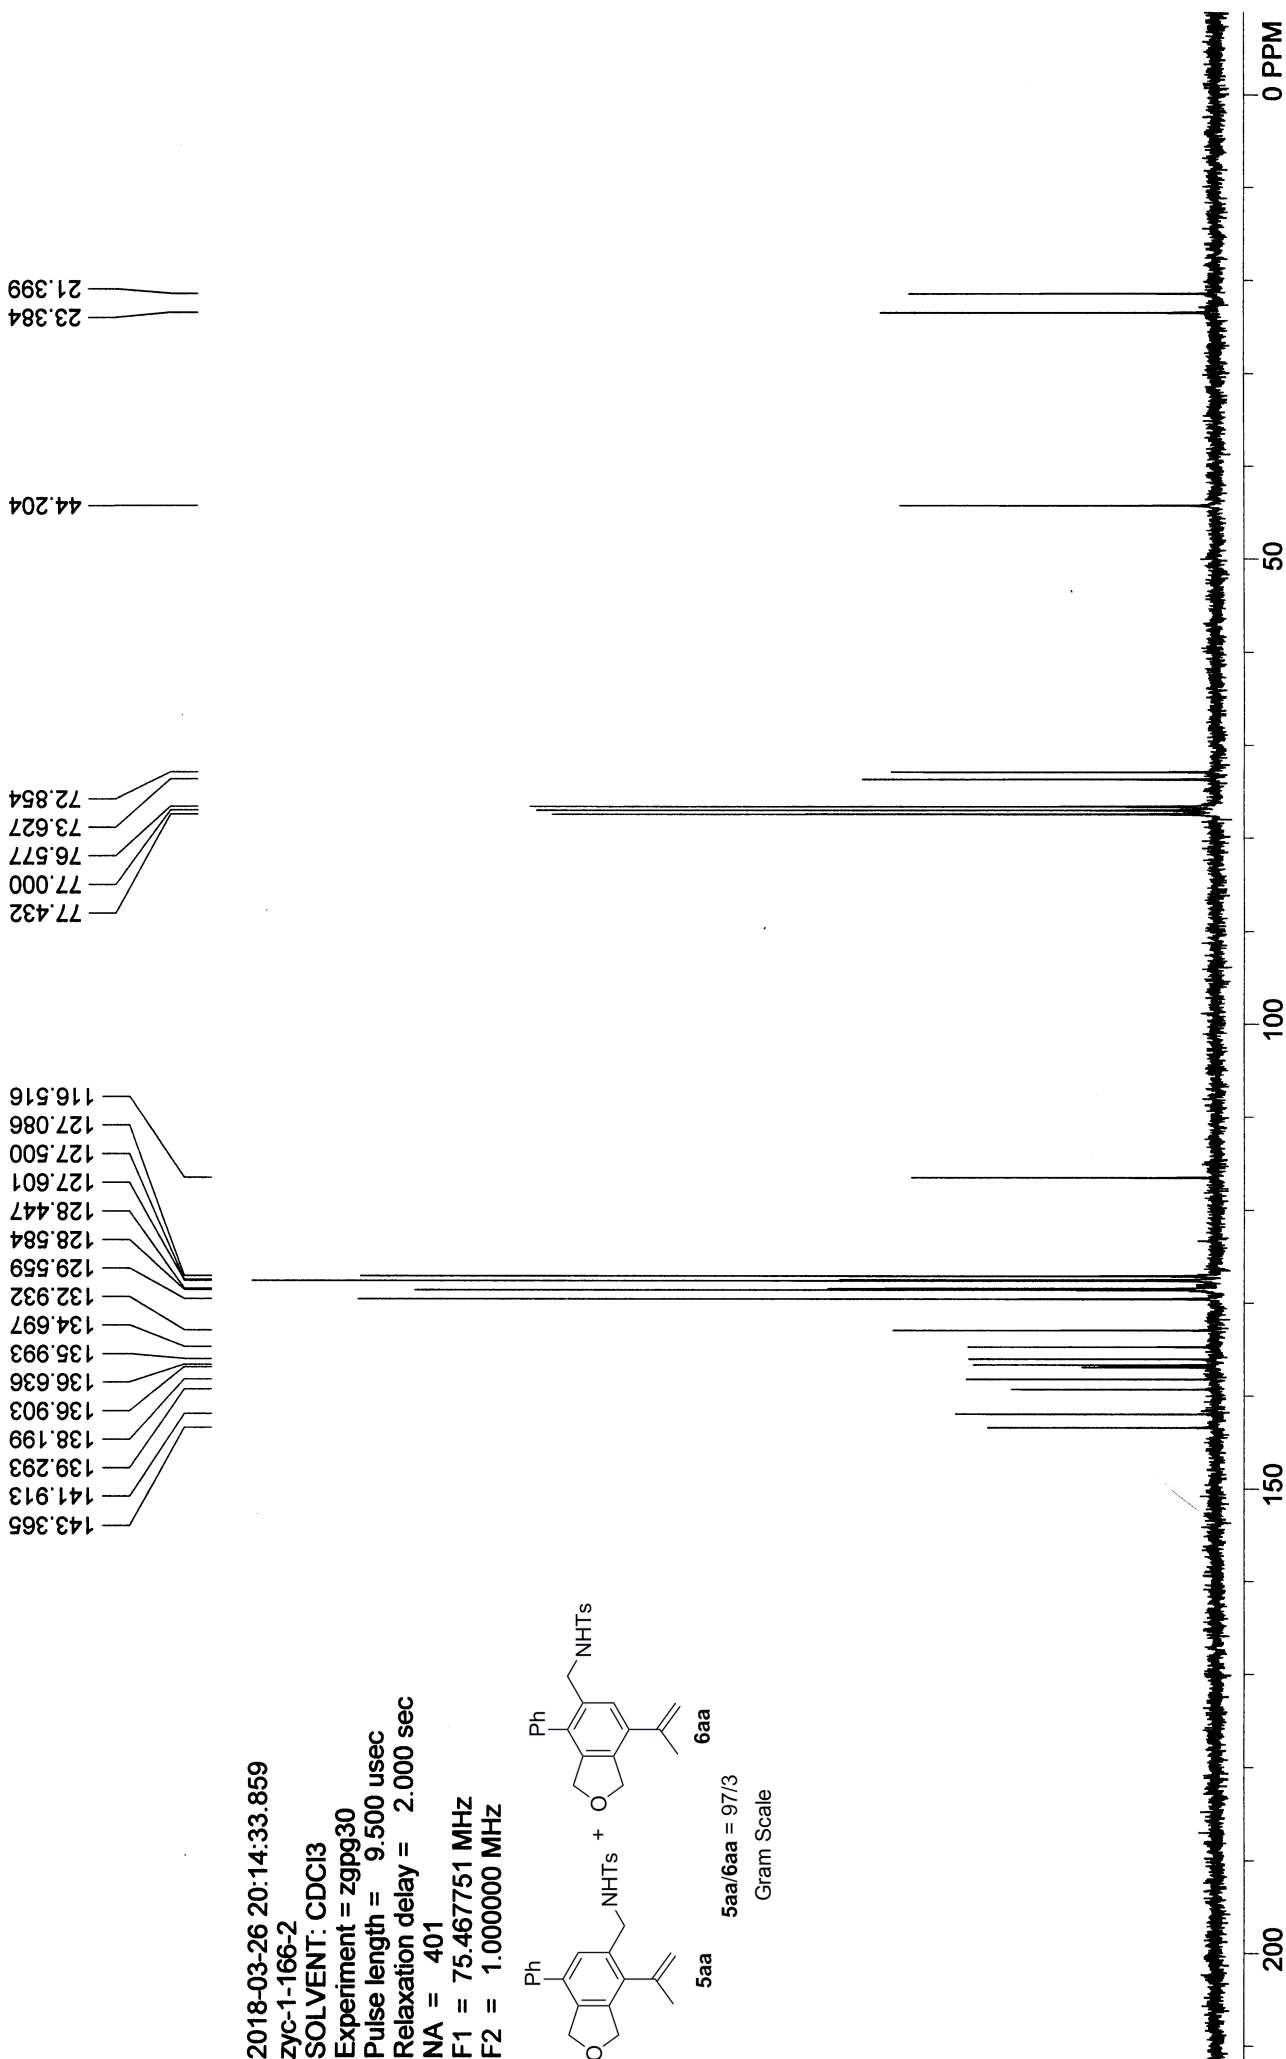

2018-03-29 21:26:19.250  
 zyc-1-166-1  
 SOLVENT: CDCl3  
 Experiment = zg30  
 Pulse length = 14.000 usec  
 Relaxation delay = 1.000 sec  
 NA = 8  
 F1 = 300.130005 MHz  
 F2 = 1.000000 MHz

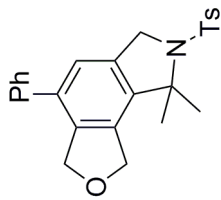

Gram Scale

S64

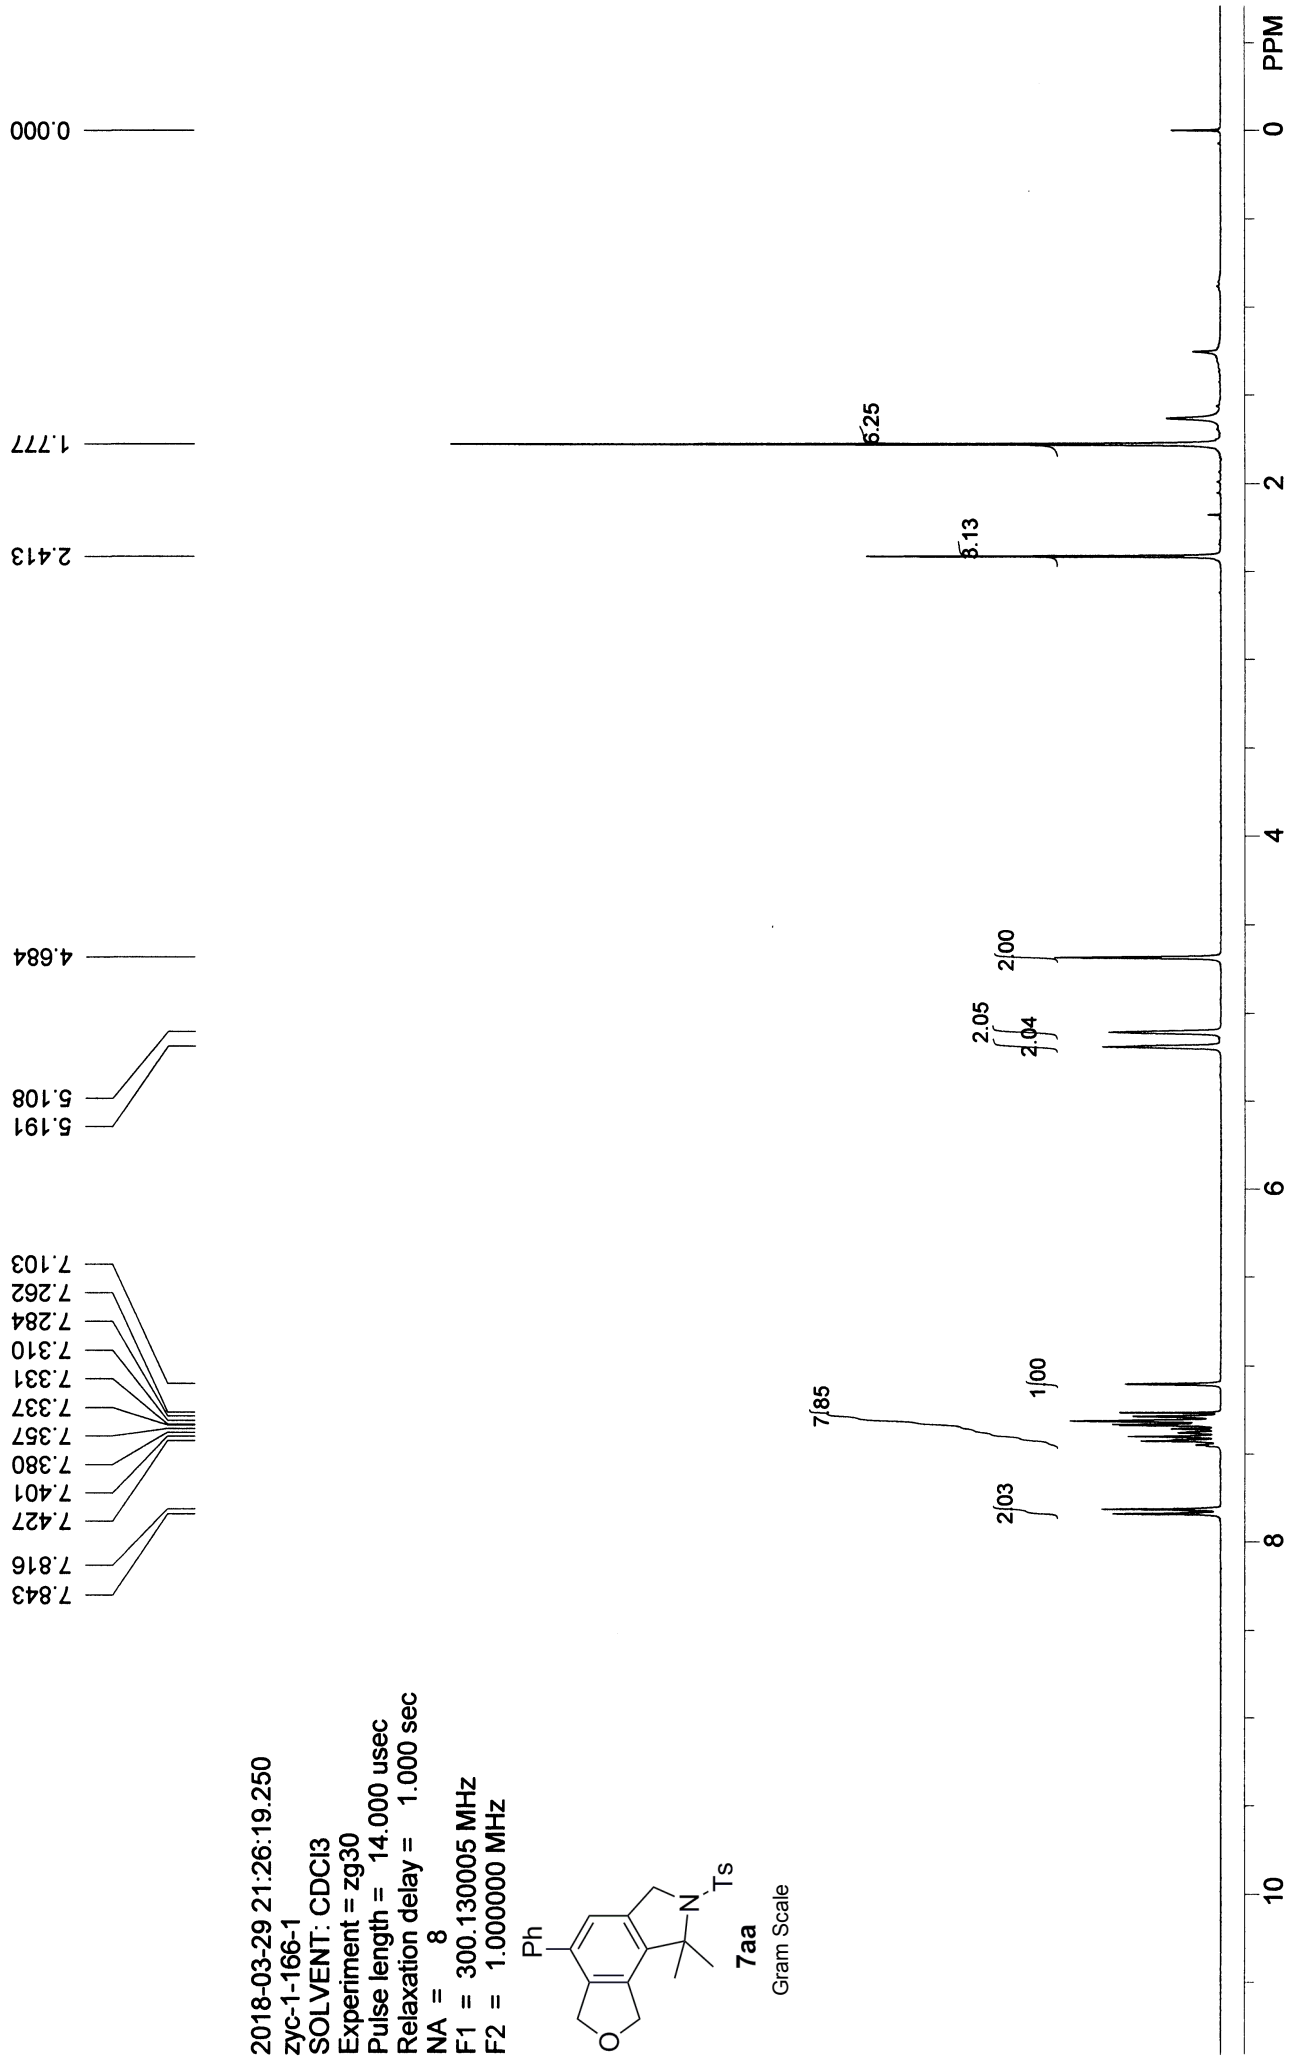

2018-04-29 13:34:40.828  
 zyc-1-166-1C  
 SOLVENT: CDCl<sub>3</sub>  
 Experiment = zgpg30  
 Pulse length = 9.500 usec  
 Relaxation delay = 2.000 sec  
 NA = 2122  
 F1 = 75.467751 MHz  
 F2 = 1.000000 MHz

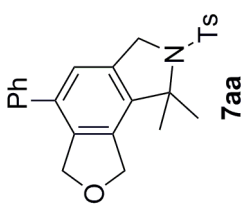

Gram Scale

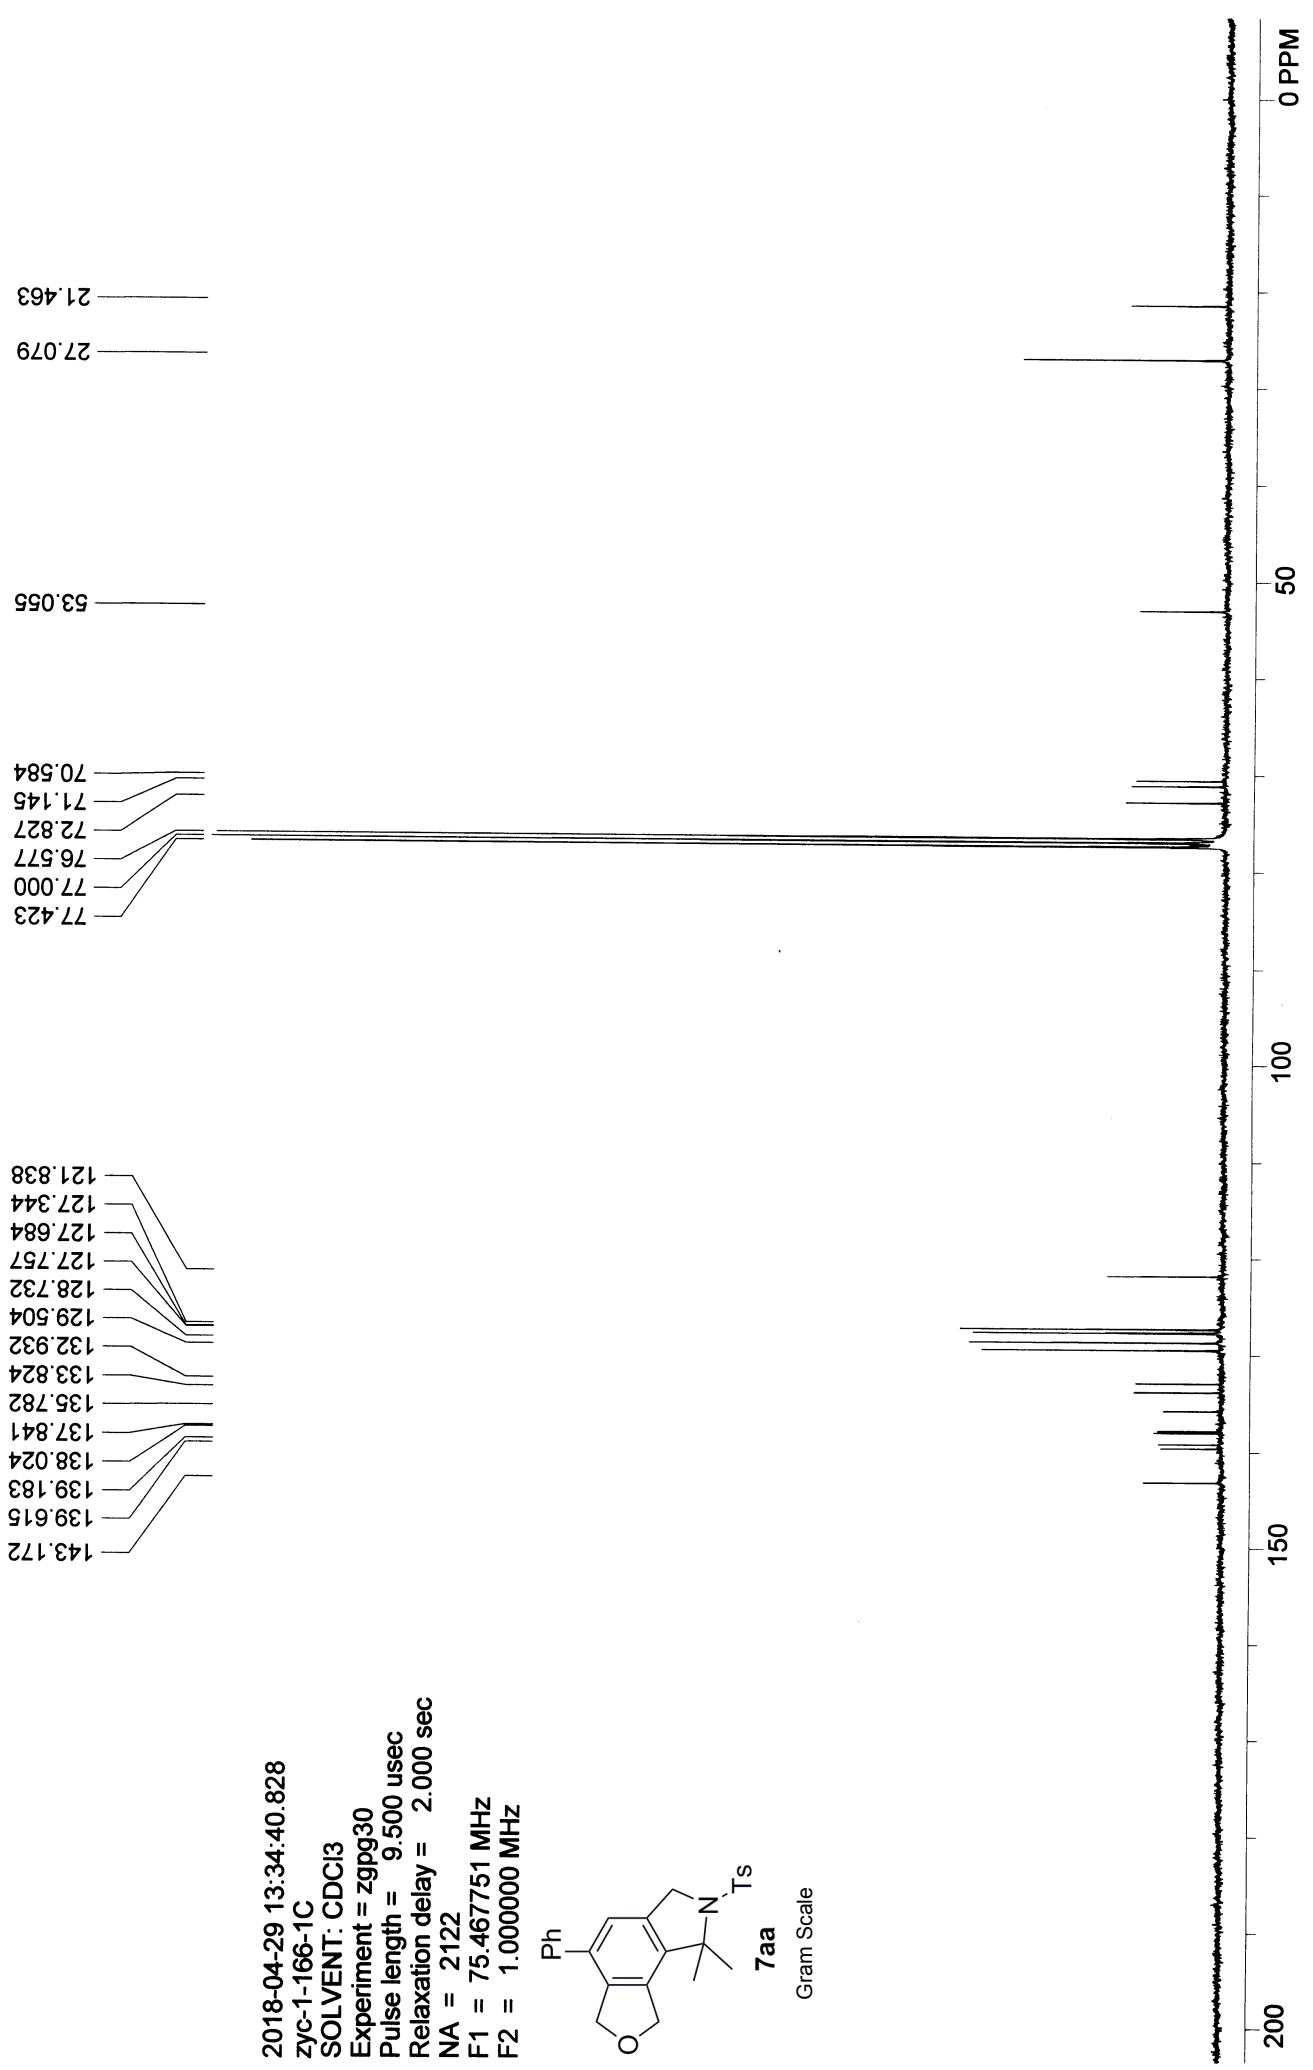

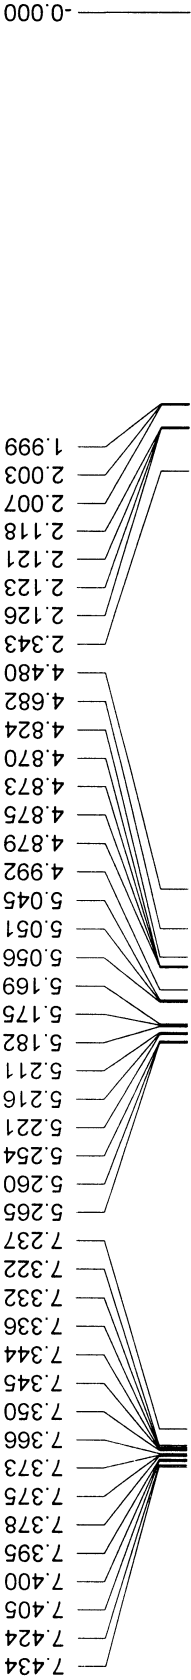

2015-06-18 22:46:05.796  
wwt-1-189-3H  
SOLVENT: CDCl3  
Experiment = zg30  
Pulse length = 14.000 usec  
Relaxation delay = 1.000 sec  
NA = 8  
F1 = 300.130005 MHz  
F2 = 1.000000 MHz

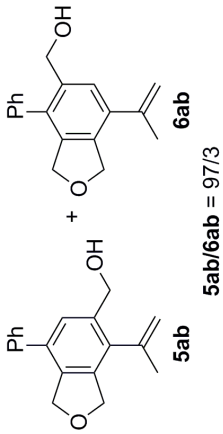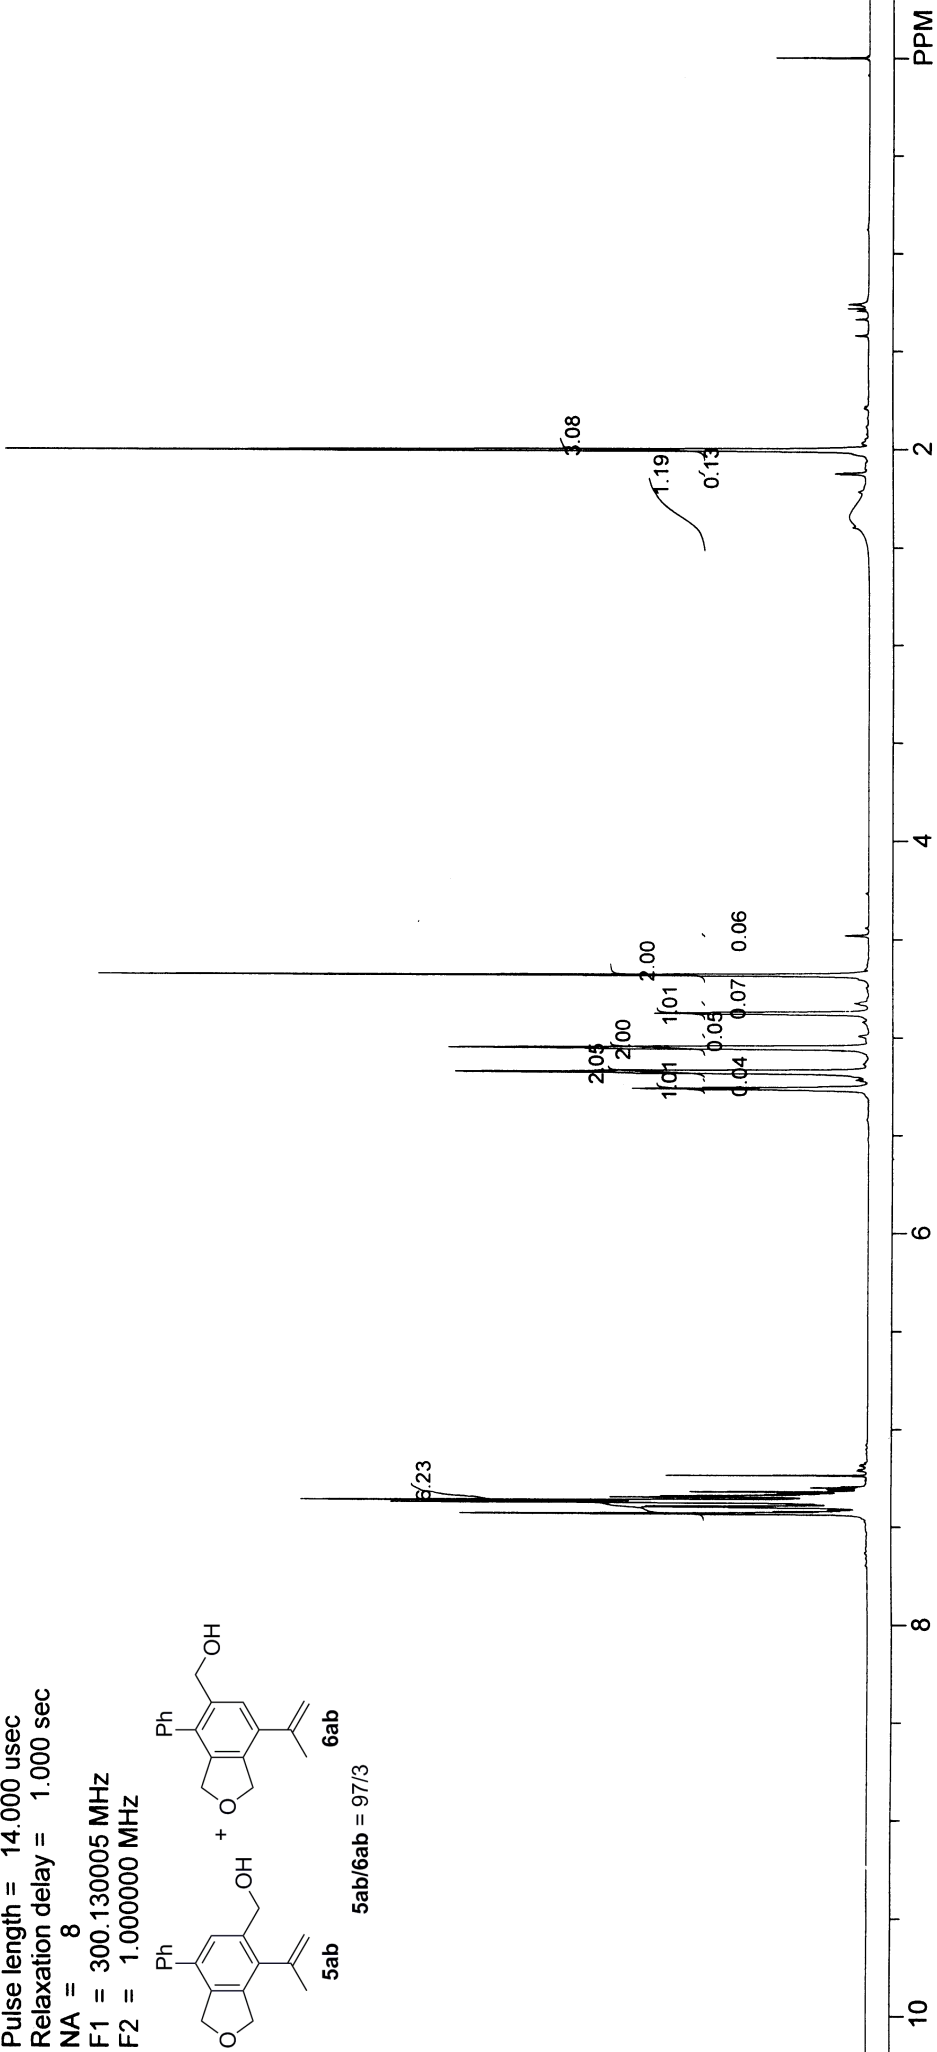

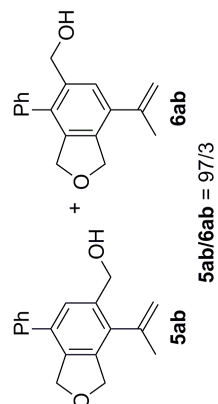

wwt-1-189-3

2015-06-19 13:33:30.031

USER: nmr

SOLVENT: CDCl<sub>3</sub>

Experiment = zgpg30

Pulse length = 9.500 usec

Relaxation delay = 2.000 sec

NA = 126

23.632

77.423  
77.000  
76.577  
73.691  
72.928  
62.376

142.437  
139.716  
137.887  
137.565  
136.223  
135.488  
134.623  
128.594  
127.674  
127.629  
127.399  
115.955

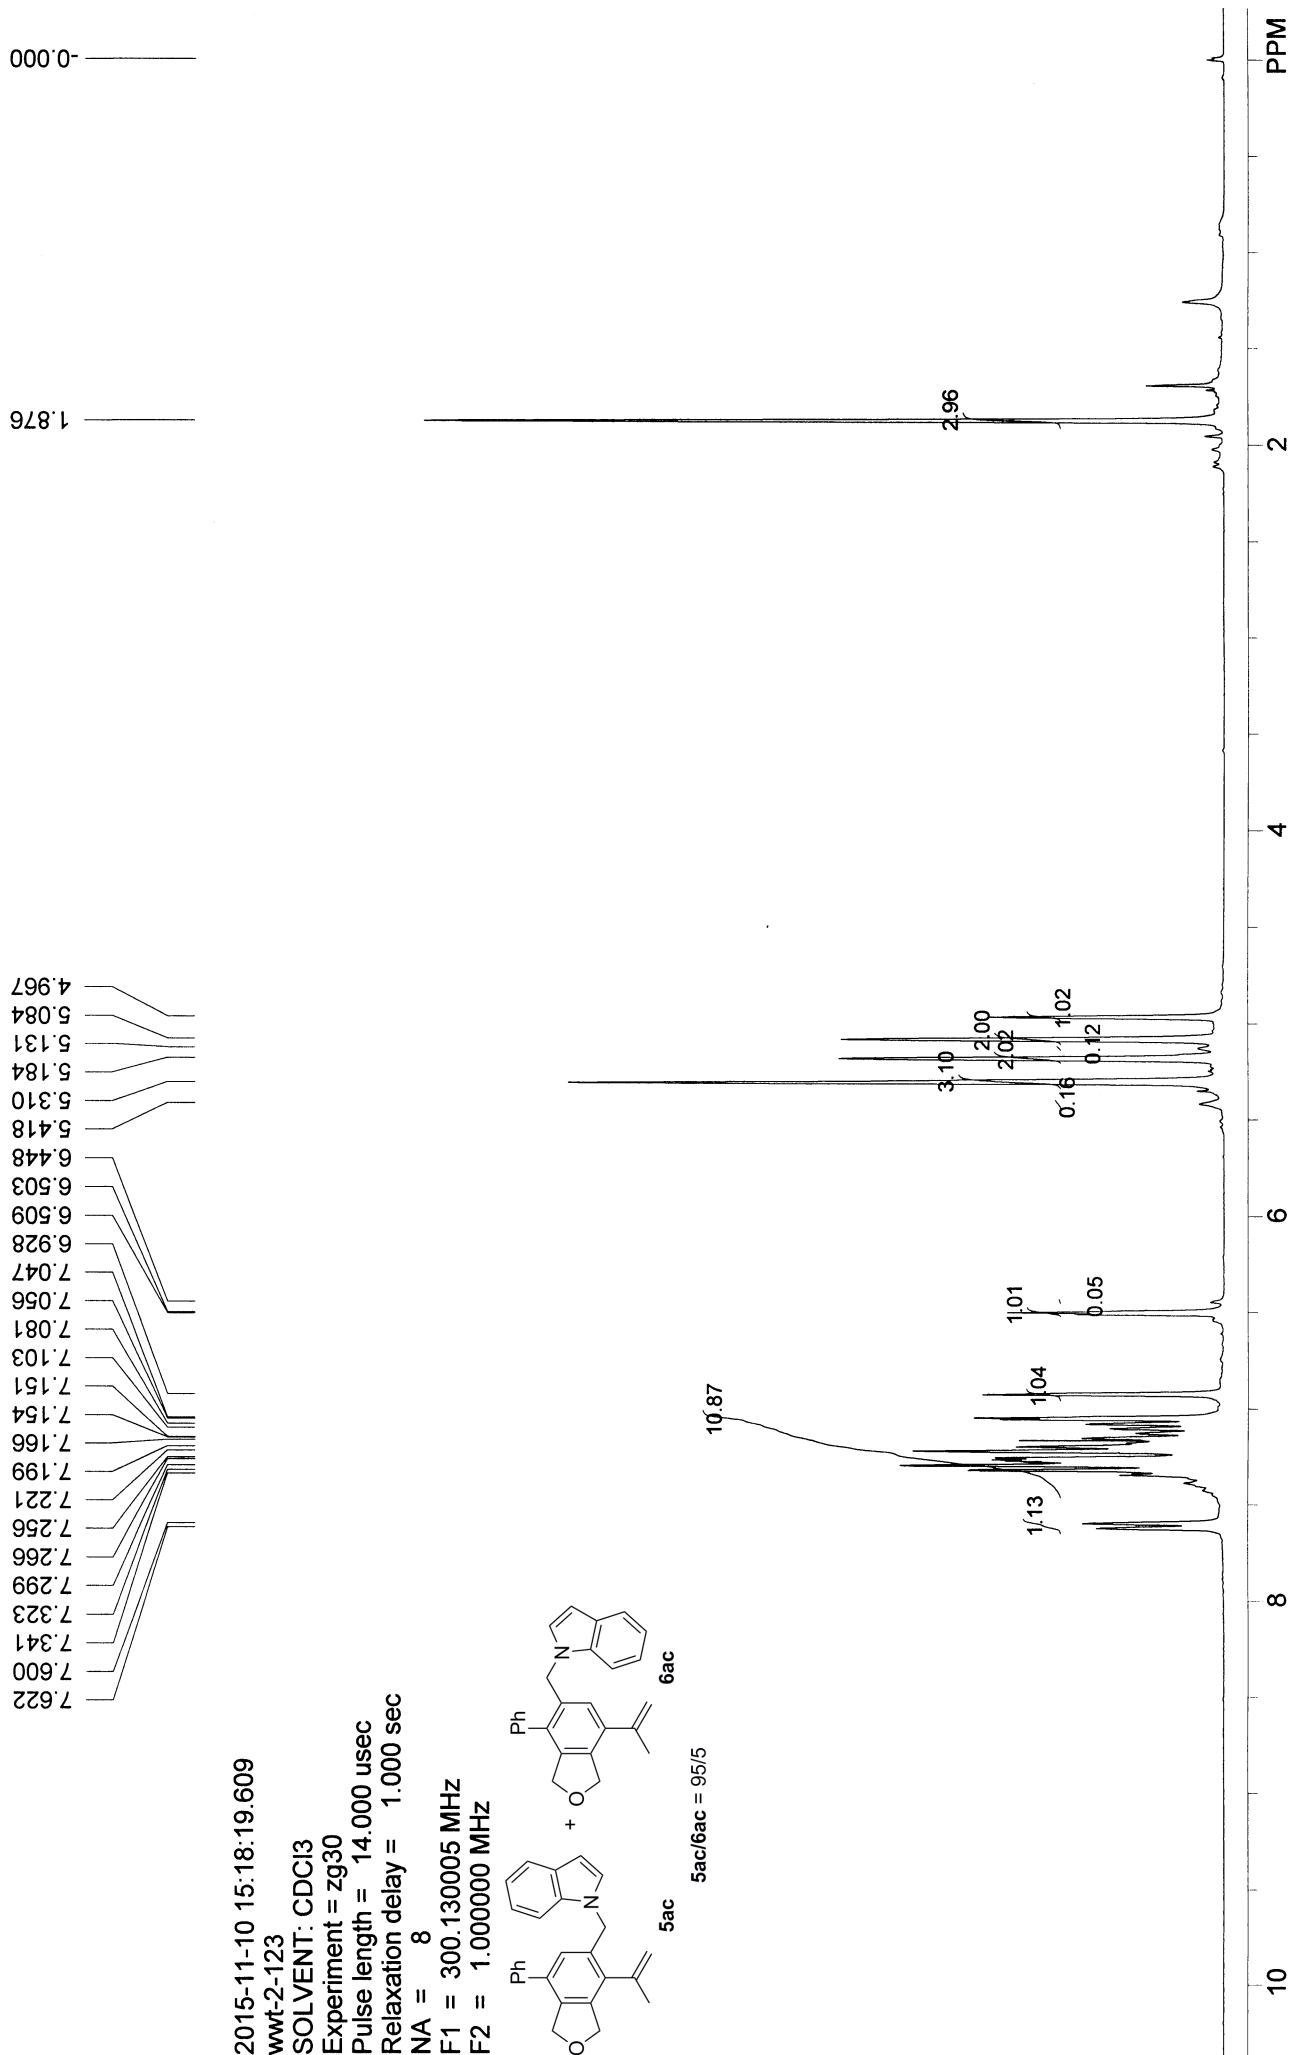



56

23.145

47.173

72.937  
73.718  
76.577  
77.000  
77.423

101.671  
109.511  
116.295  
119.429  
120.882  
121.534  
127.298  
127.426  
127.629  
128.015  
128.594  
133.943  
134.743  
135.772  
136.260  
136.618  
136.420  
138.422  
139.422  
142.115

wwt-2-123

2015-11-10 15:31:56.109

USER: nmr

SOLVENT: CDCl3

Experiment = zgpg30

Pulse length = 9.500 usec

Relaxation delay = 2.000 sec

NA = 191

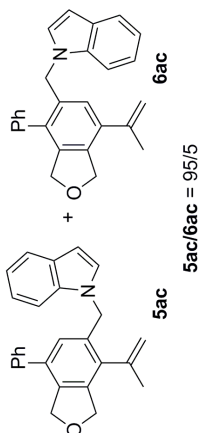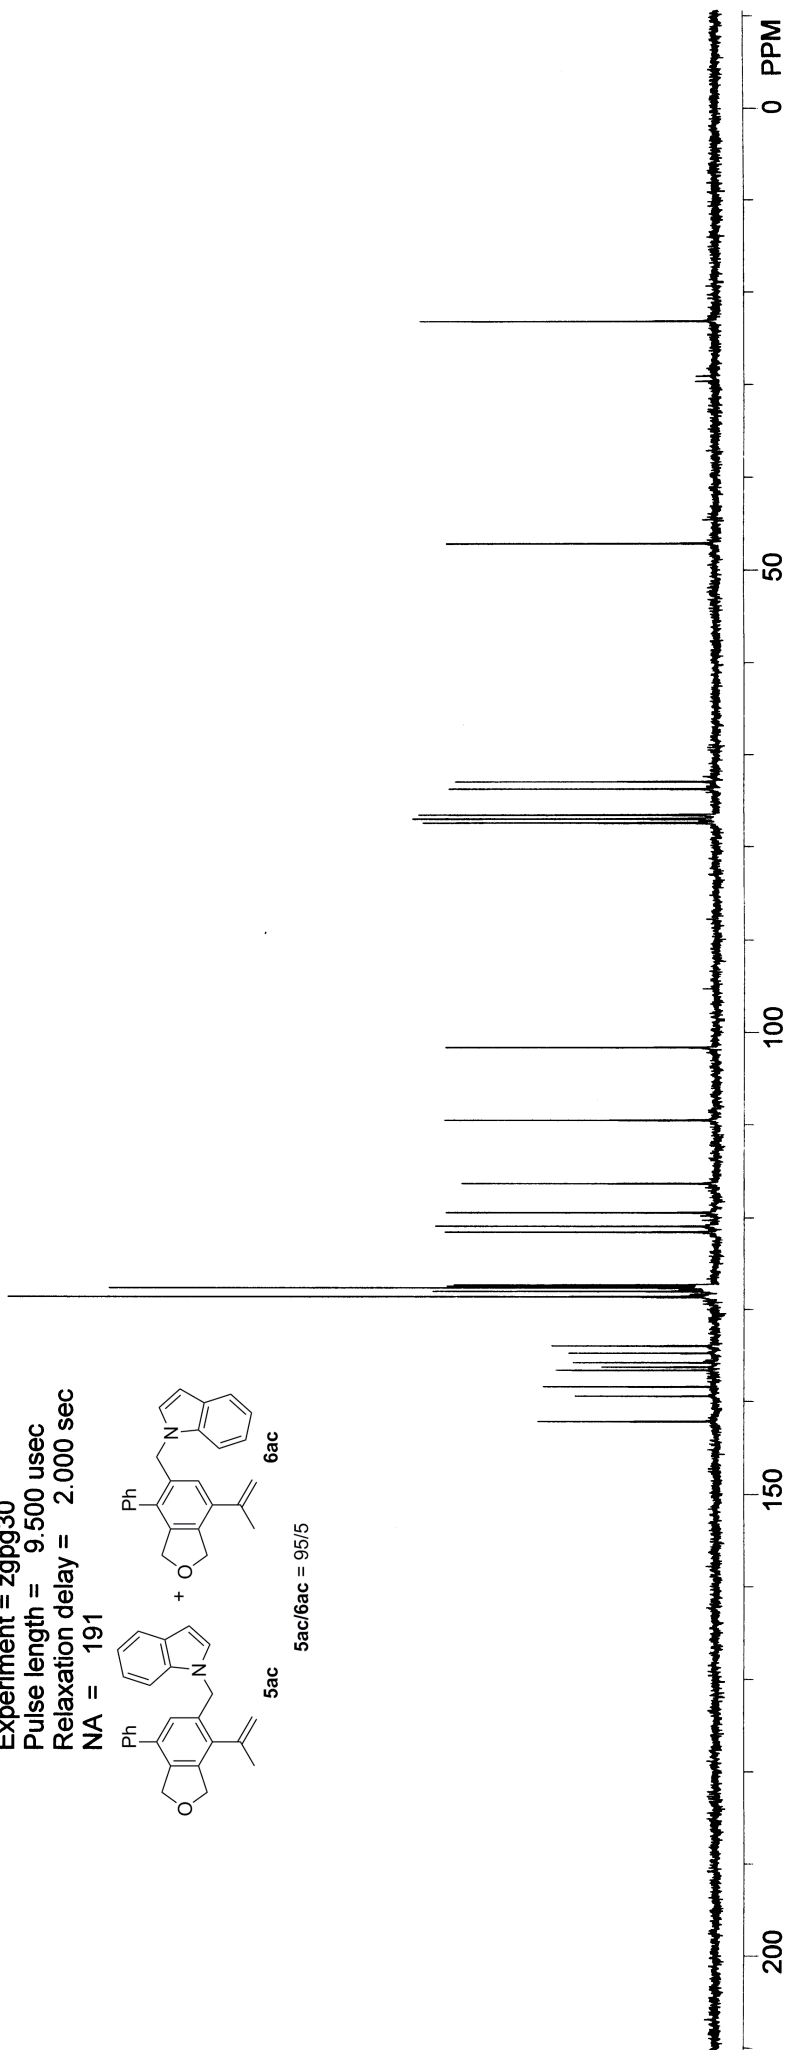

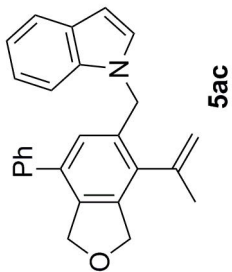

2017-10-25 11:55:31.125

zyc-1-68re

SOLVENT: CDCl<sub>3</sub>

Experiment = zg30

Pulse length = 14.000 usec

Relaxation delay = 1.000 sec

NA = 40

F1 = 300.130005 MHz

F2 = 1.000000 MHz

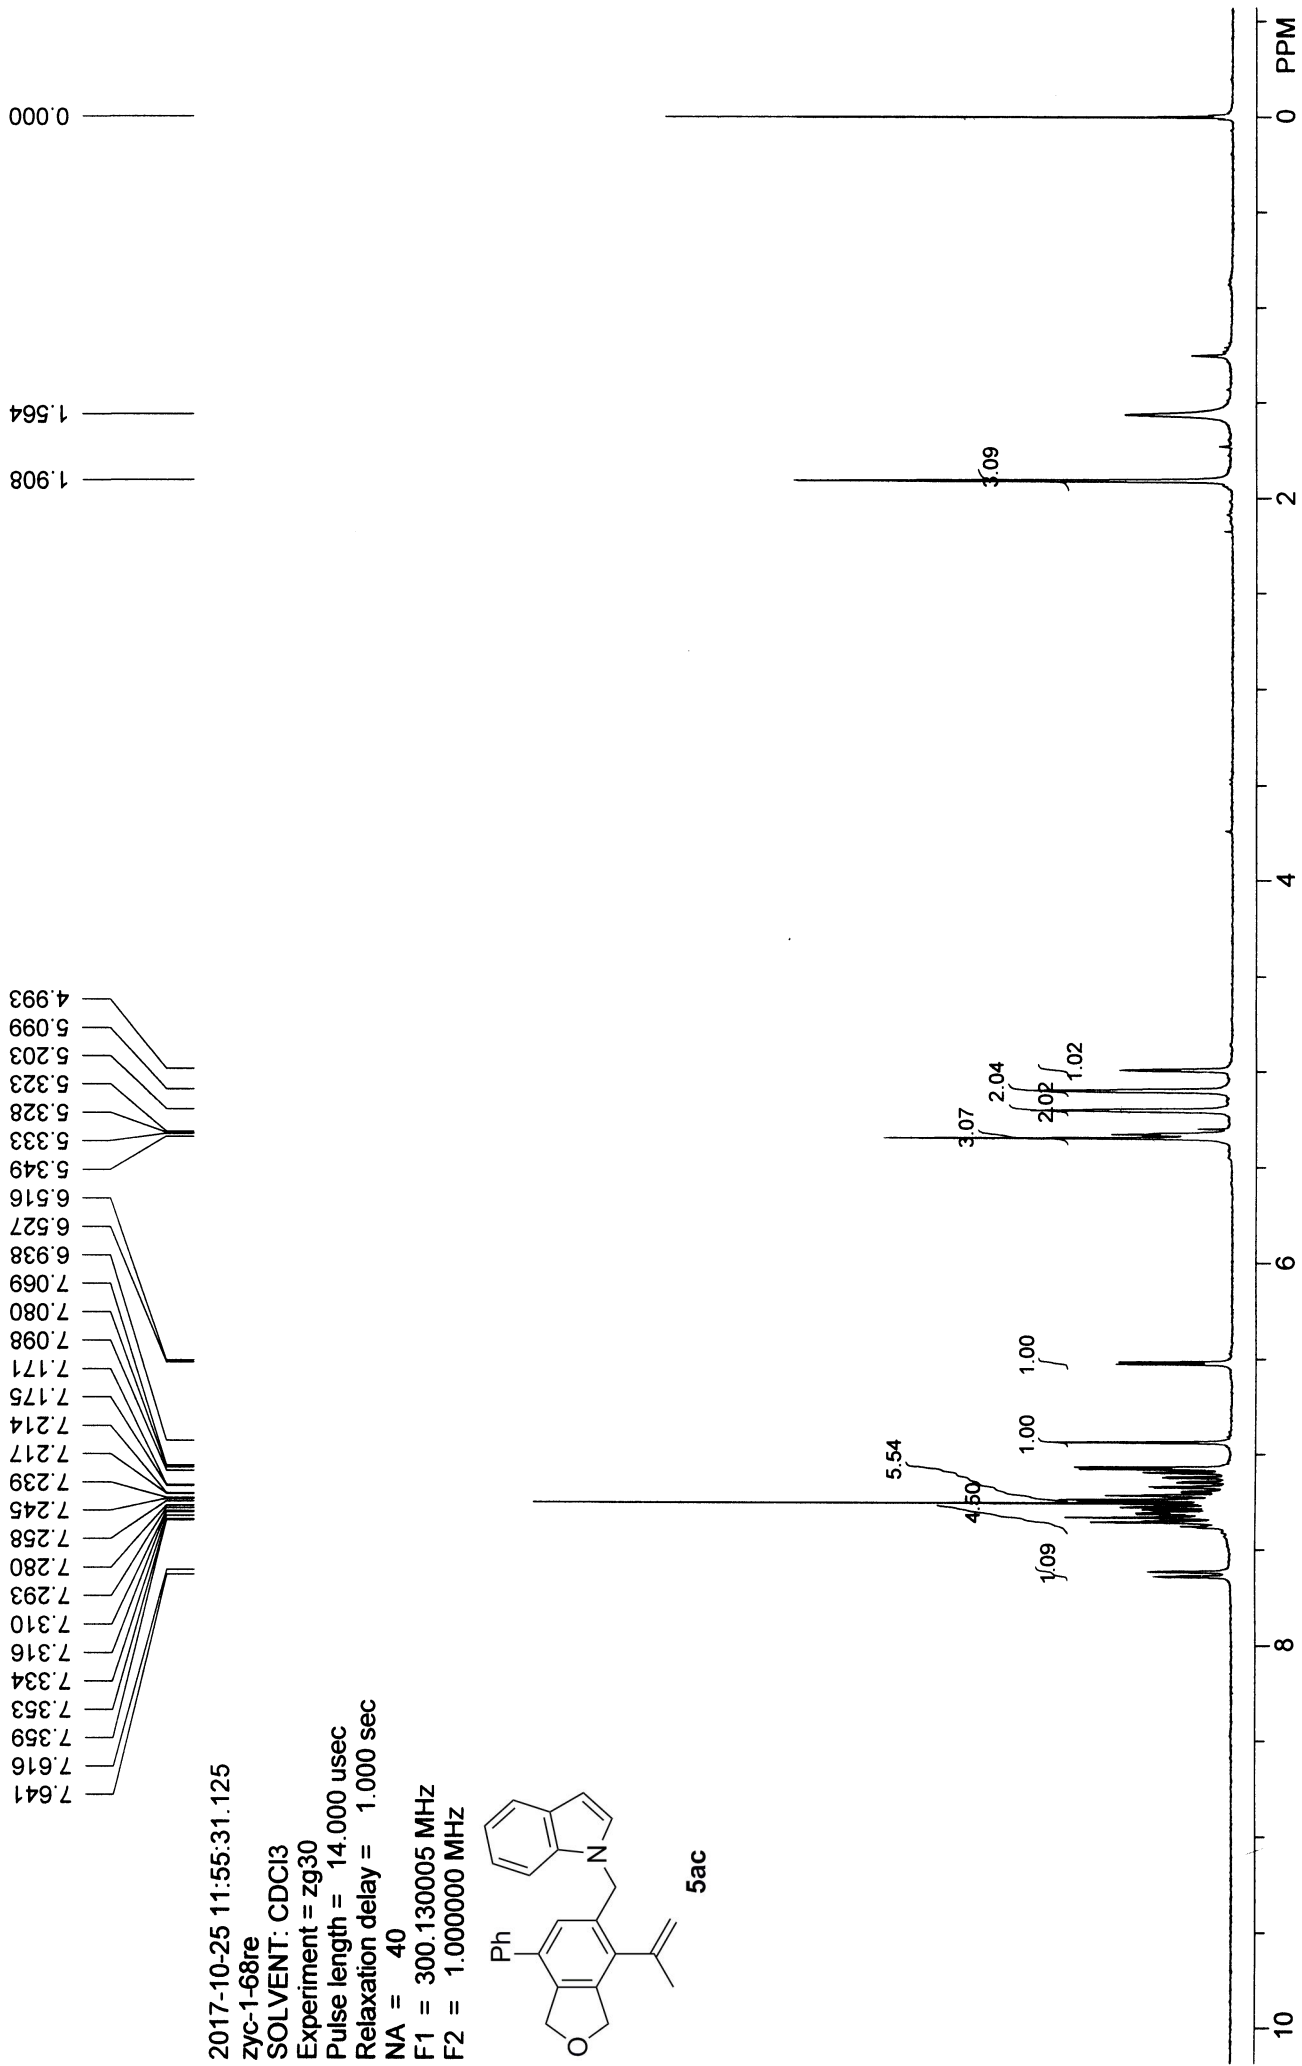

2017-12-11 16:02:16.890

zyc-1-102H

SOLVENT: CDCl<sub>3</sub>

Experiment = zg30

Pulse length = 14.000 usec

Relaxation delay = 1.000 sec

NA = 8

Solvent = CDCl<sub>3</sub>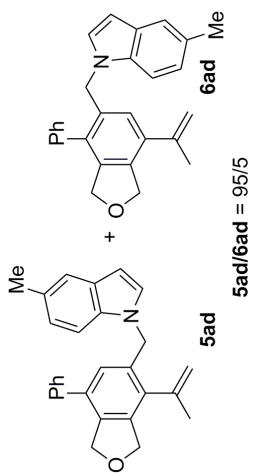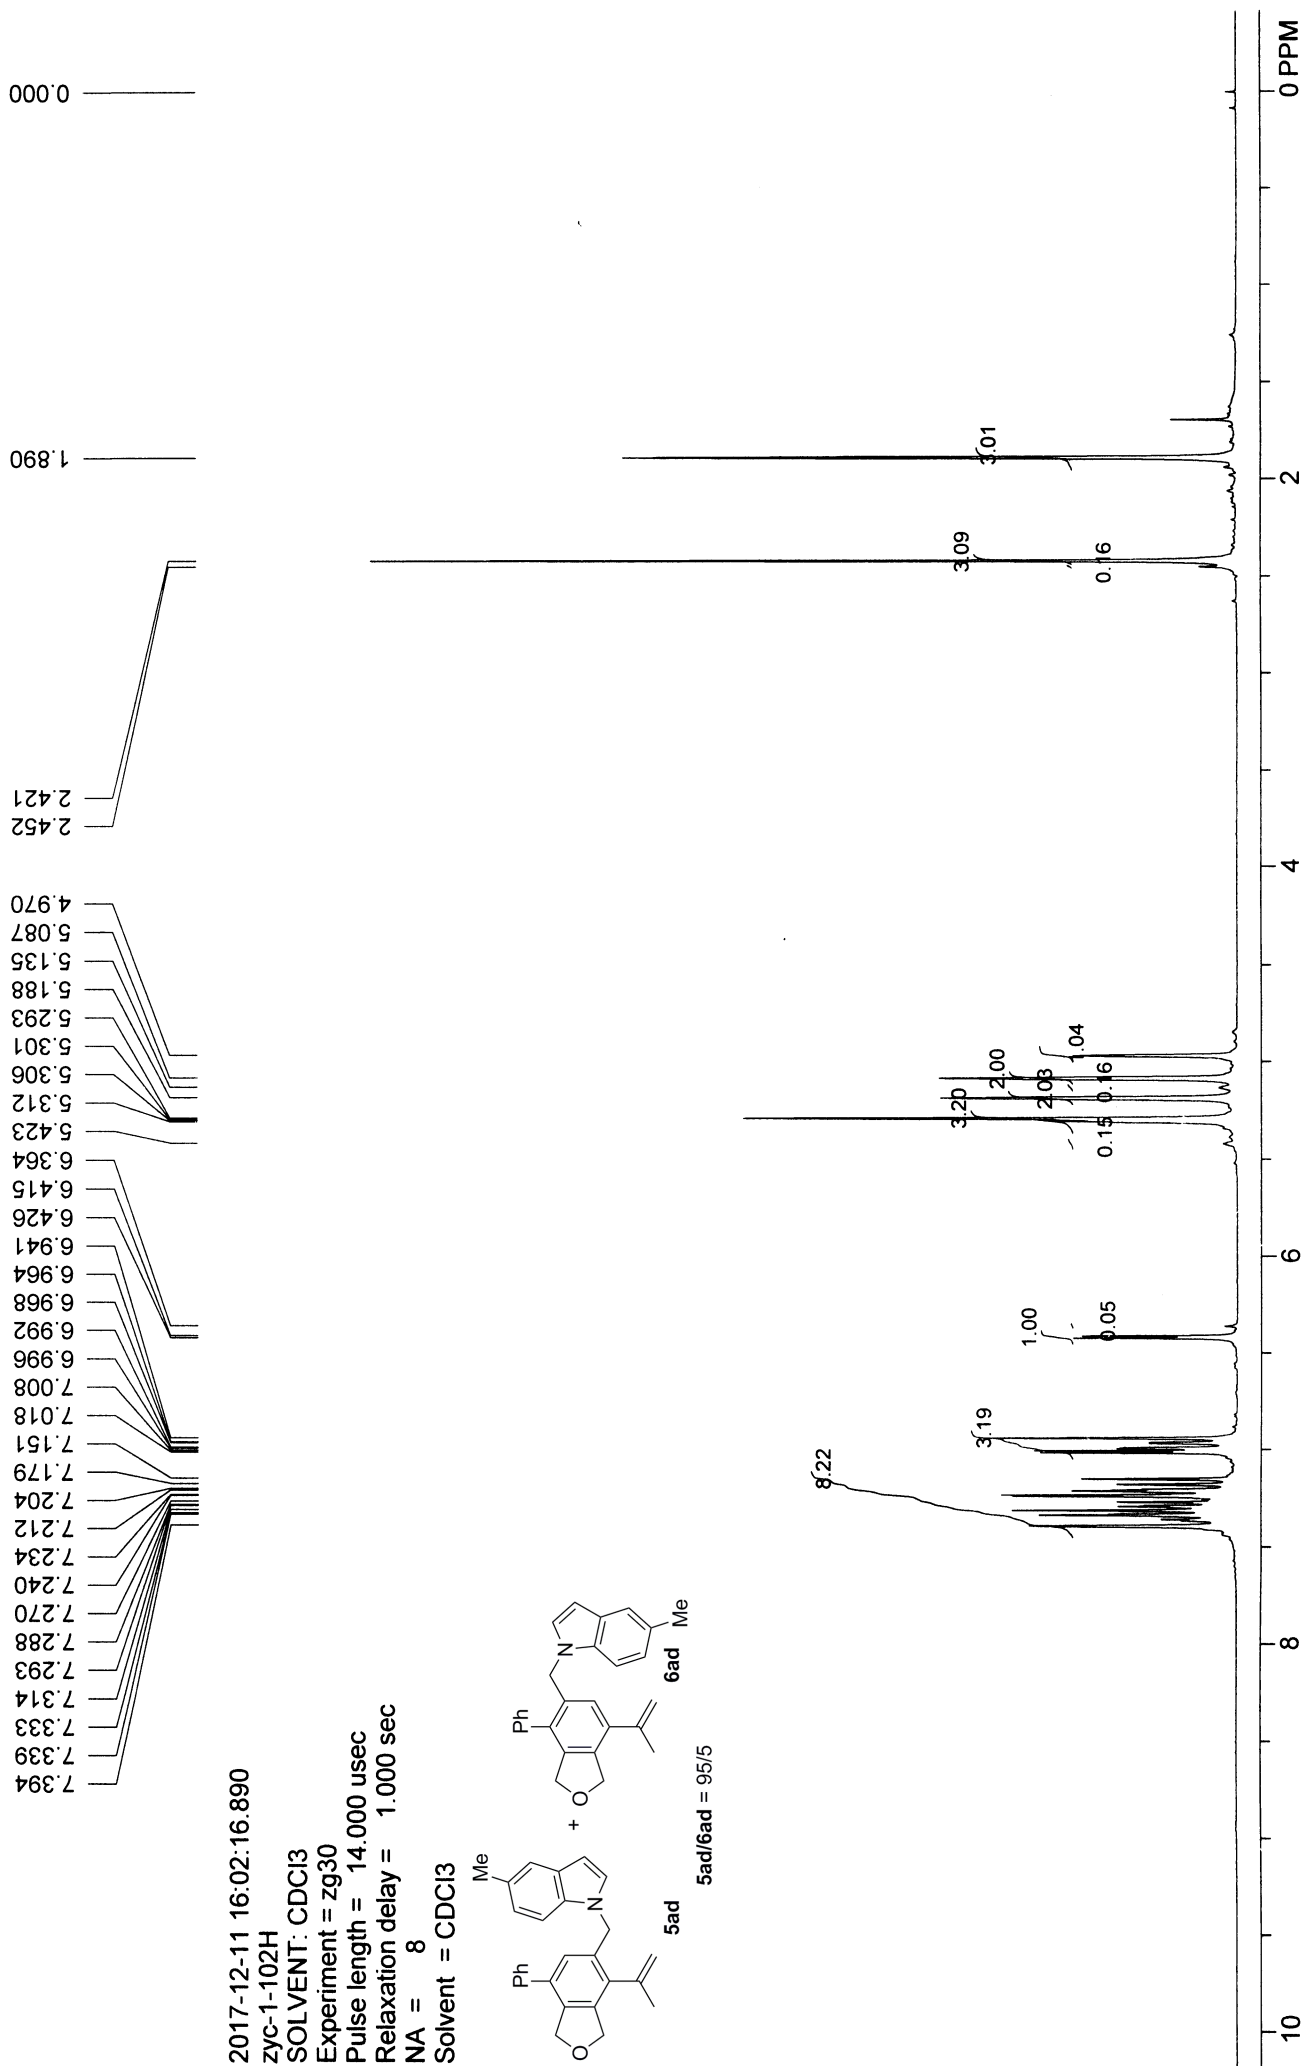

2017-12-11 16:17:09.843

zyc-1-102C

SOLVENT: CDCl<sub>3</sub>

Experiment = zgpg30

Pulse length = 9.500 usec

Relaxation delay = 2.000 sec

NA = 210

F1 = 75.467751 MHz

F2 = 1.000000 MHz

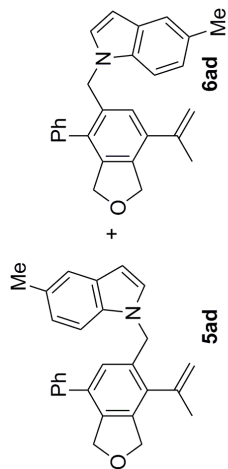

5ad/6ad = 95/5

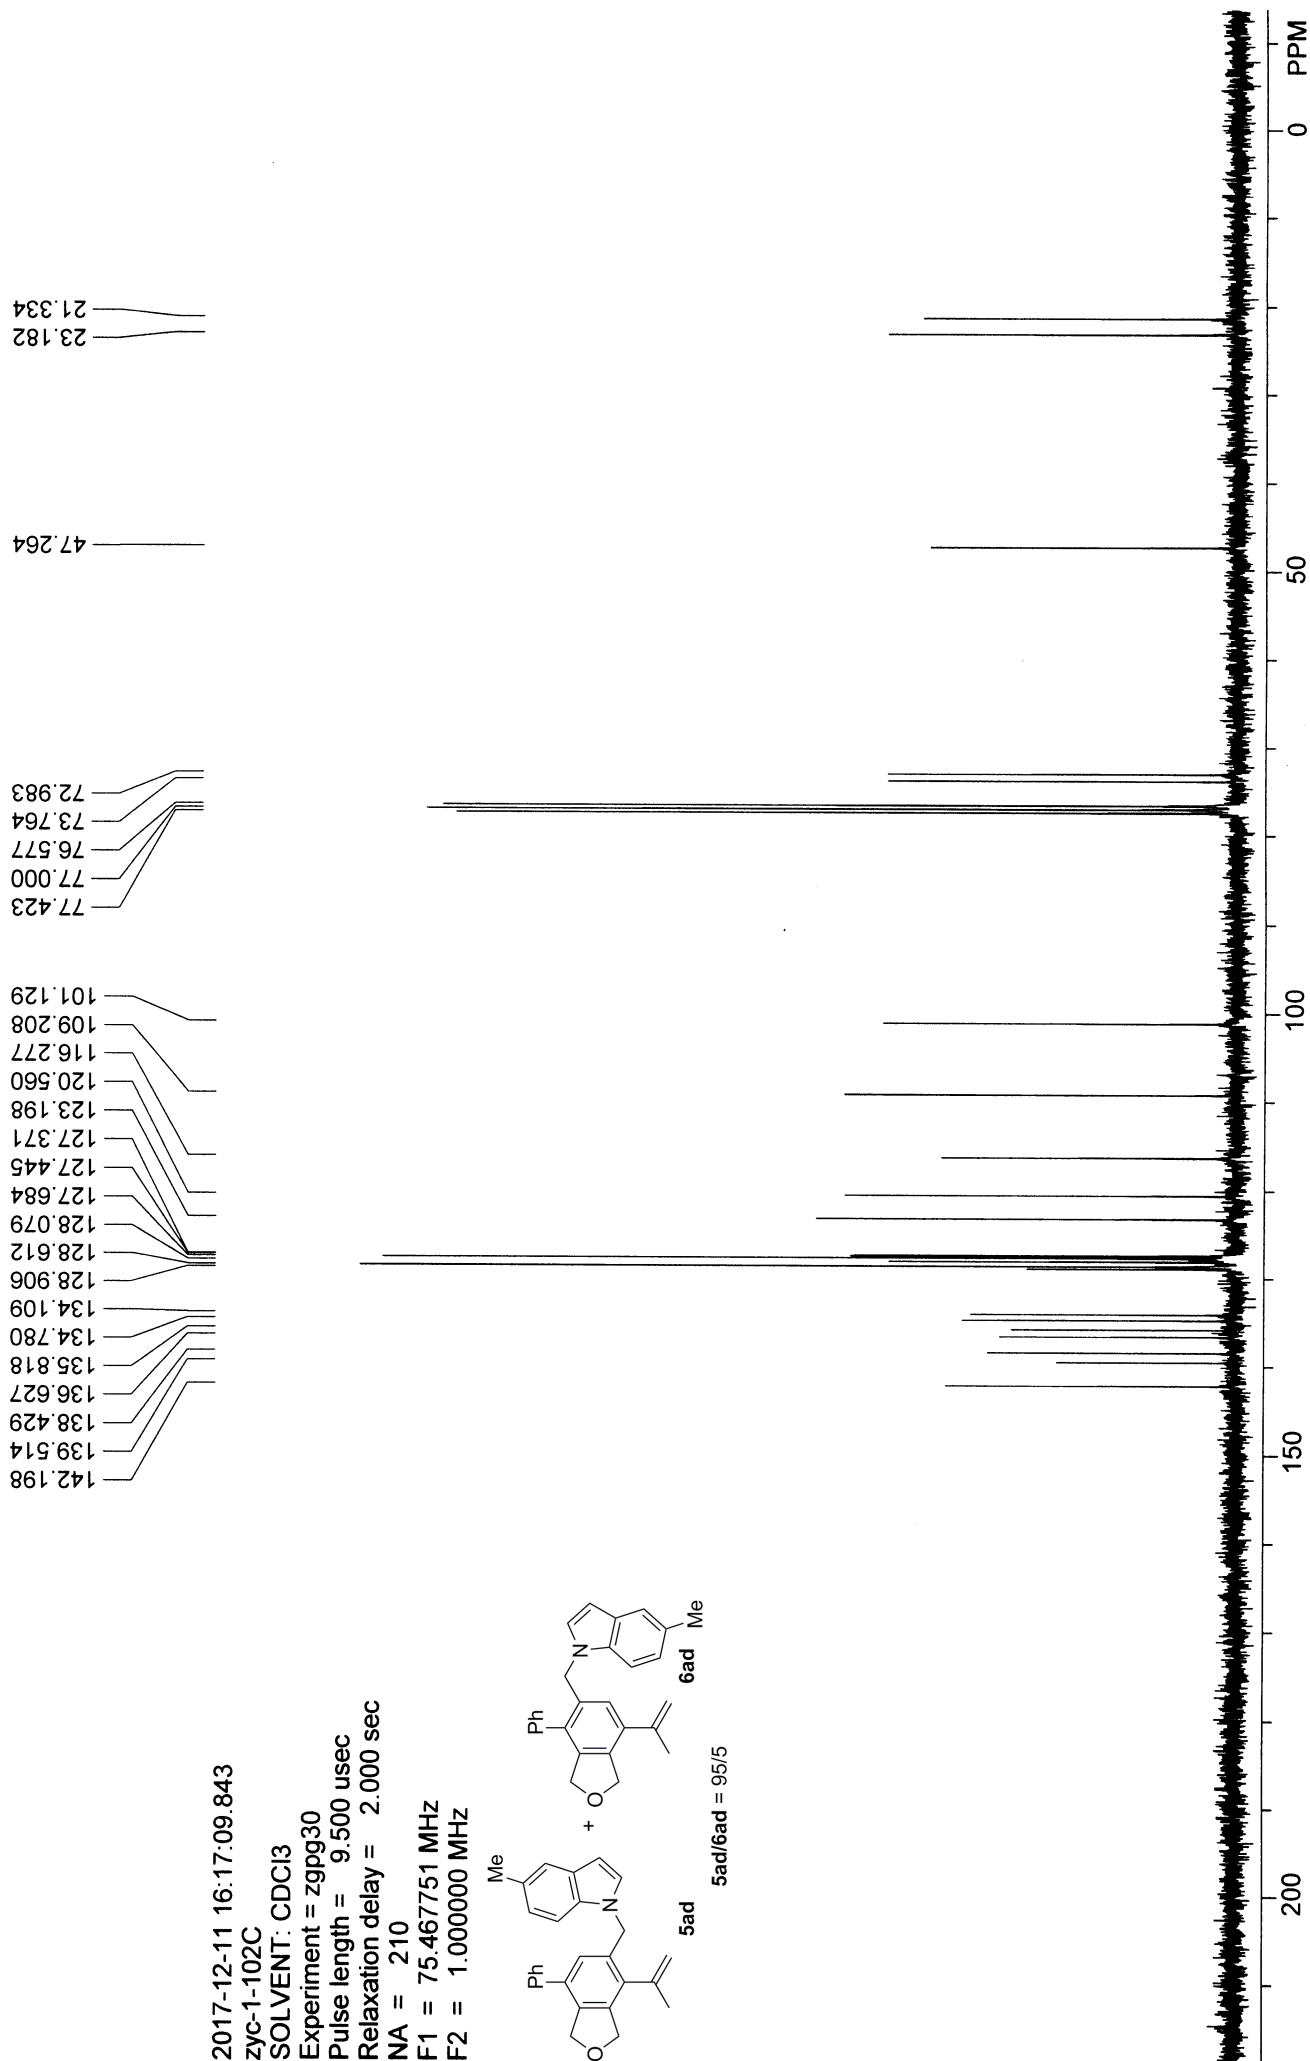

2018-01-25 11:18:11.218

zyc-1-102RE

SOLVENT: CDCl<sub>3</sub>

Experiment = zg30

Pulse length = 14.000 usec

Relaxation delay = 1.000 sec

NA = 8

F1 = 300.130005 MHz

F2 = 1.000000 MHz

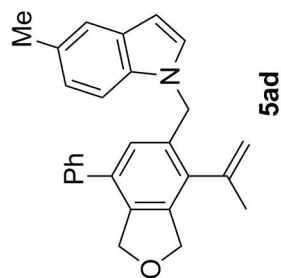

5ad

S73

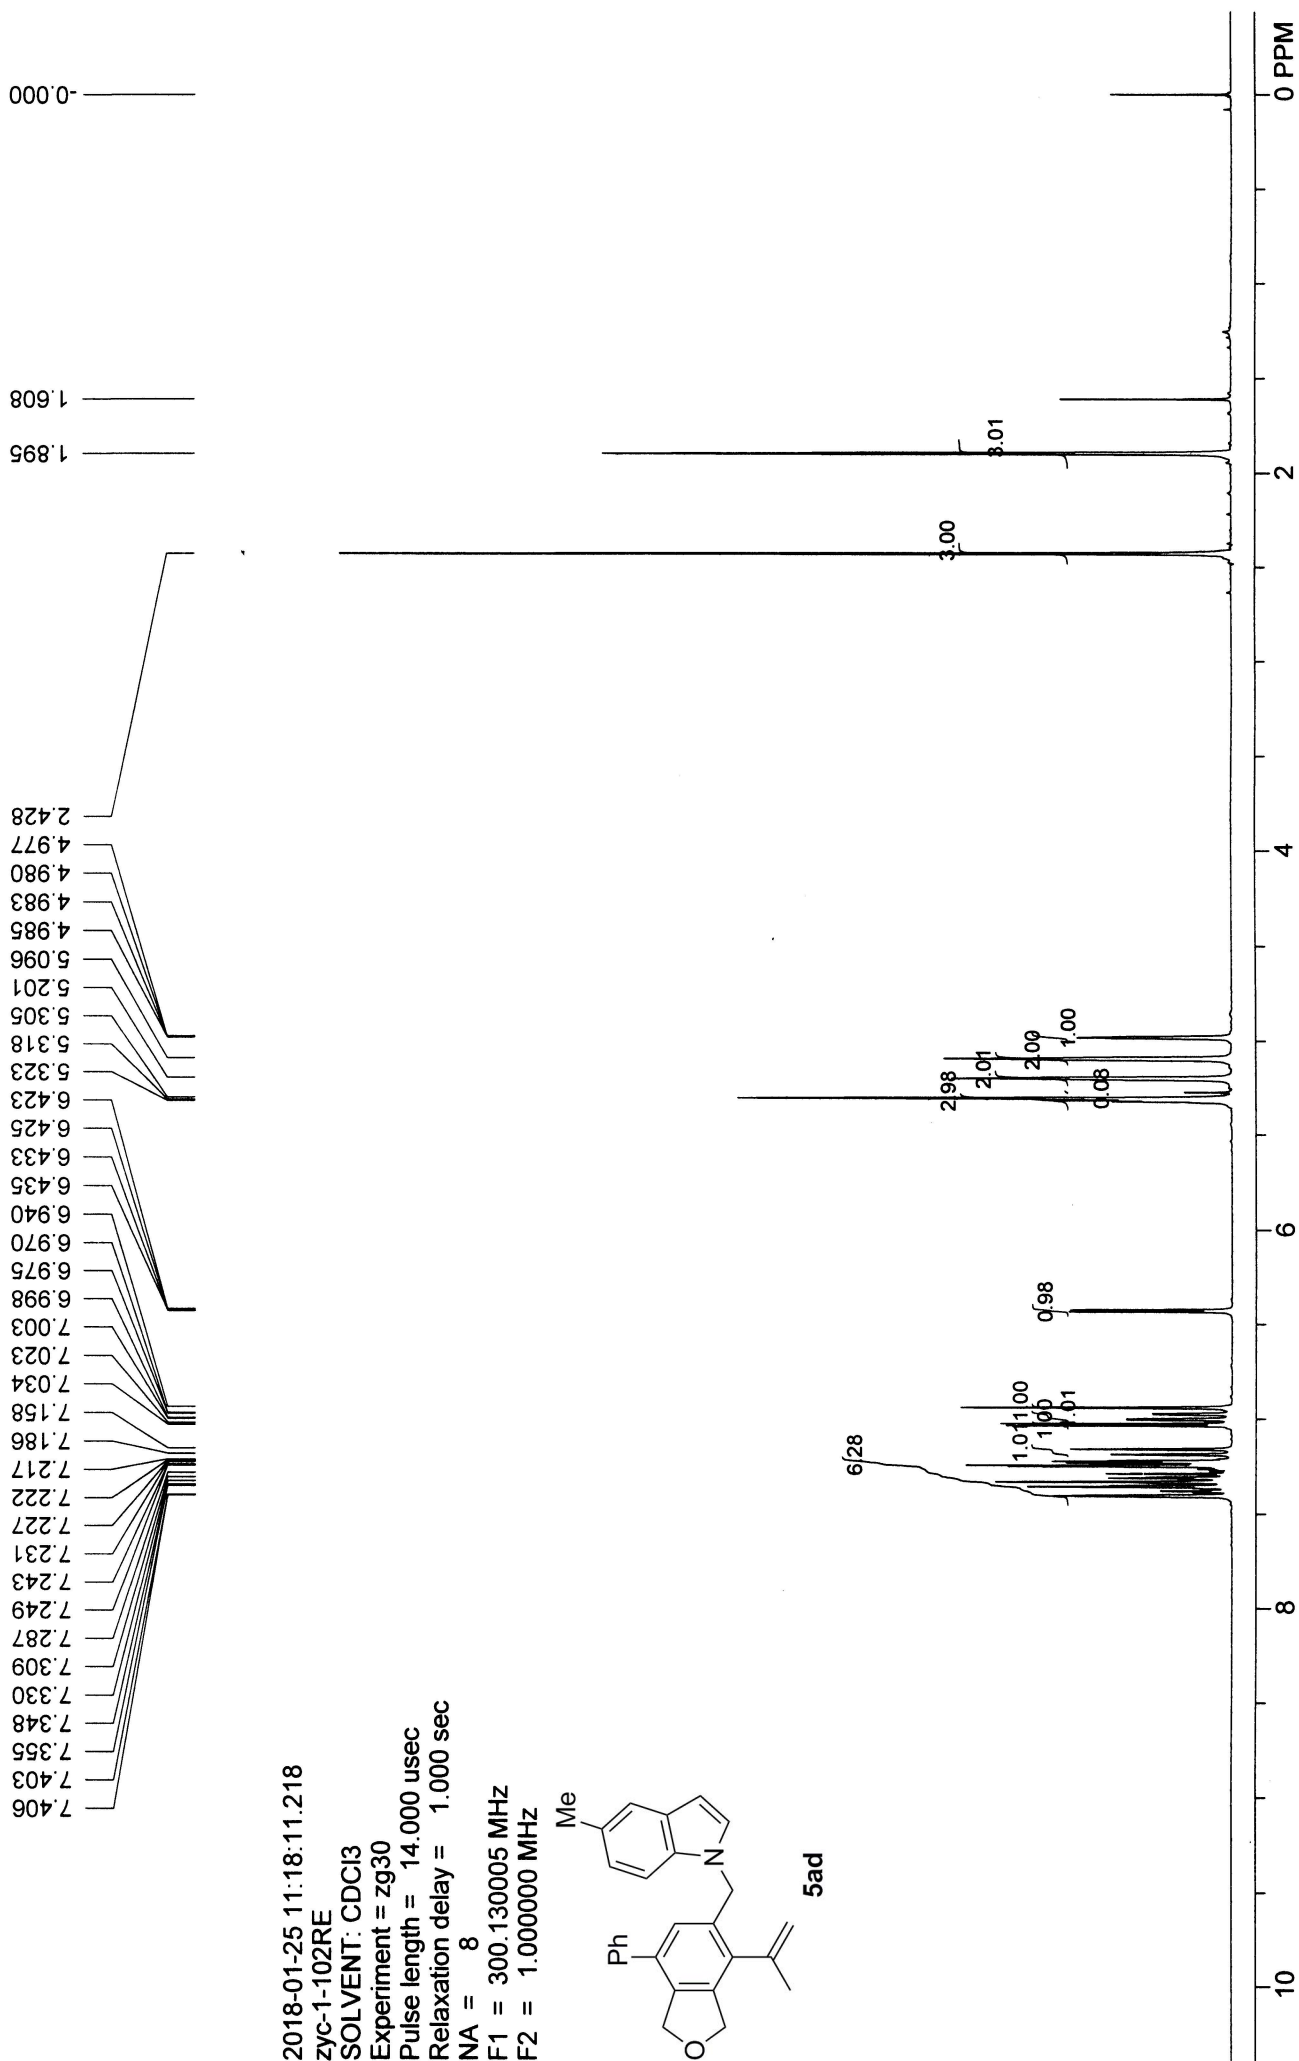

2017-11-01 17:09:36.984  
 zyc-1-79 H  
 SOLVENT: CDCl3  
 Experiment = zg30  
 Pulse length = 14.000 usec  
 Relaxation delay = 1.000 sec  
 NA = 8  
 F1 = 300.130005 MHz  
 F2 = 1.000000 MHz

8.320  
8.310  
8.290  
7.417  
7.395  
7.640  
7.371  
7.346  
7.327  
7.315  
7.295  
7.286  
7.280  
7.252  
7.070  
5.379  
5.314  
5.308  
5.303  
5.223  
5.102  
4.948

1.870

0.000

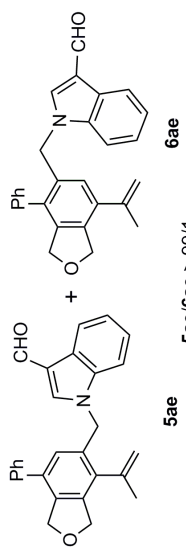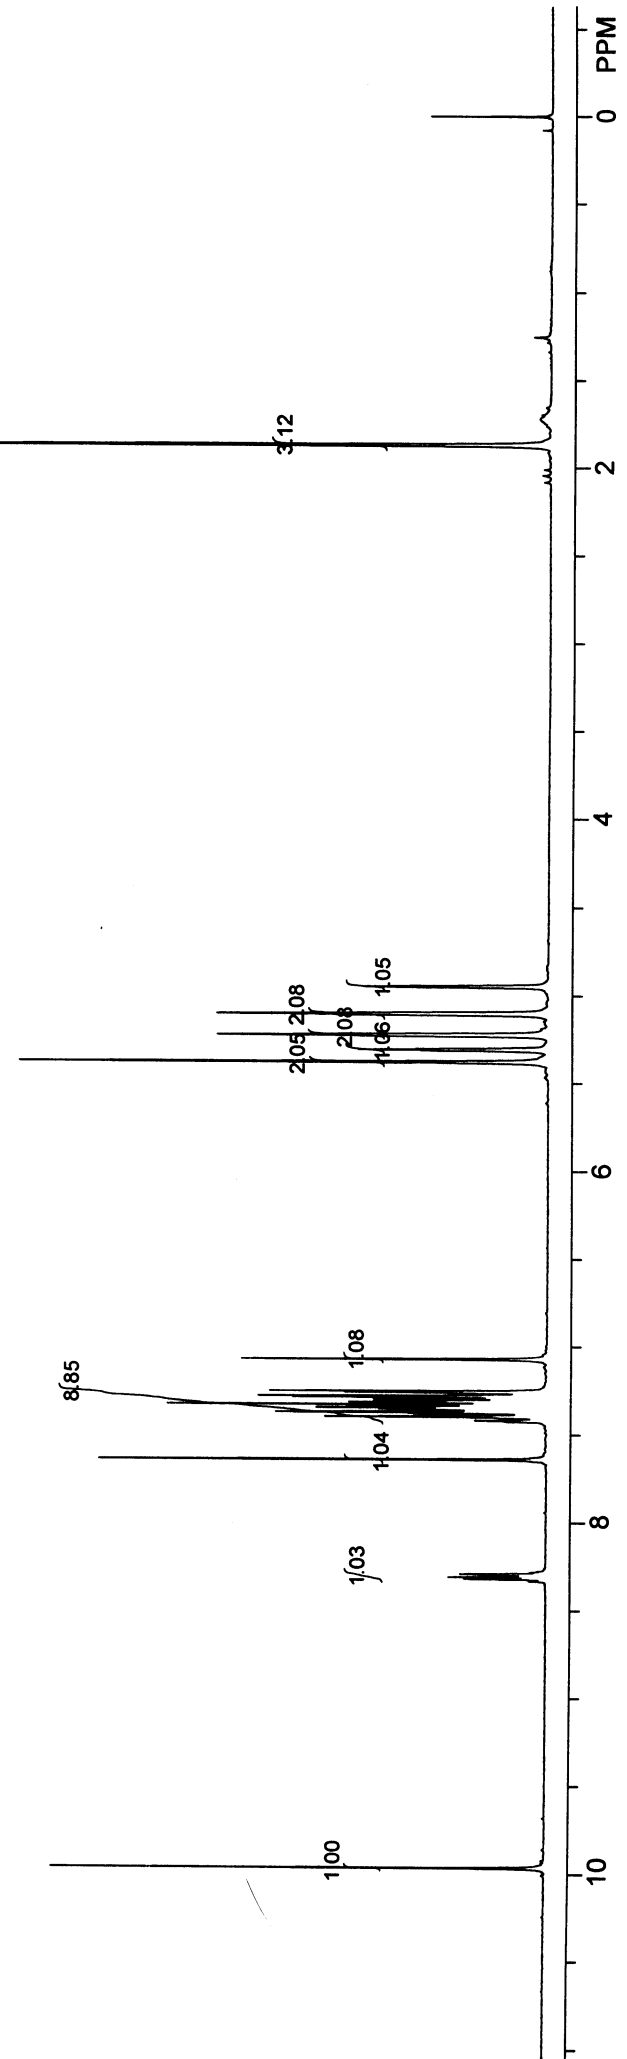

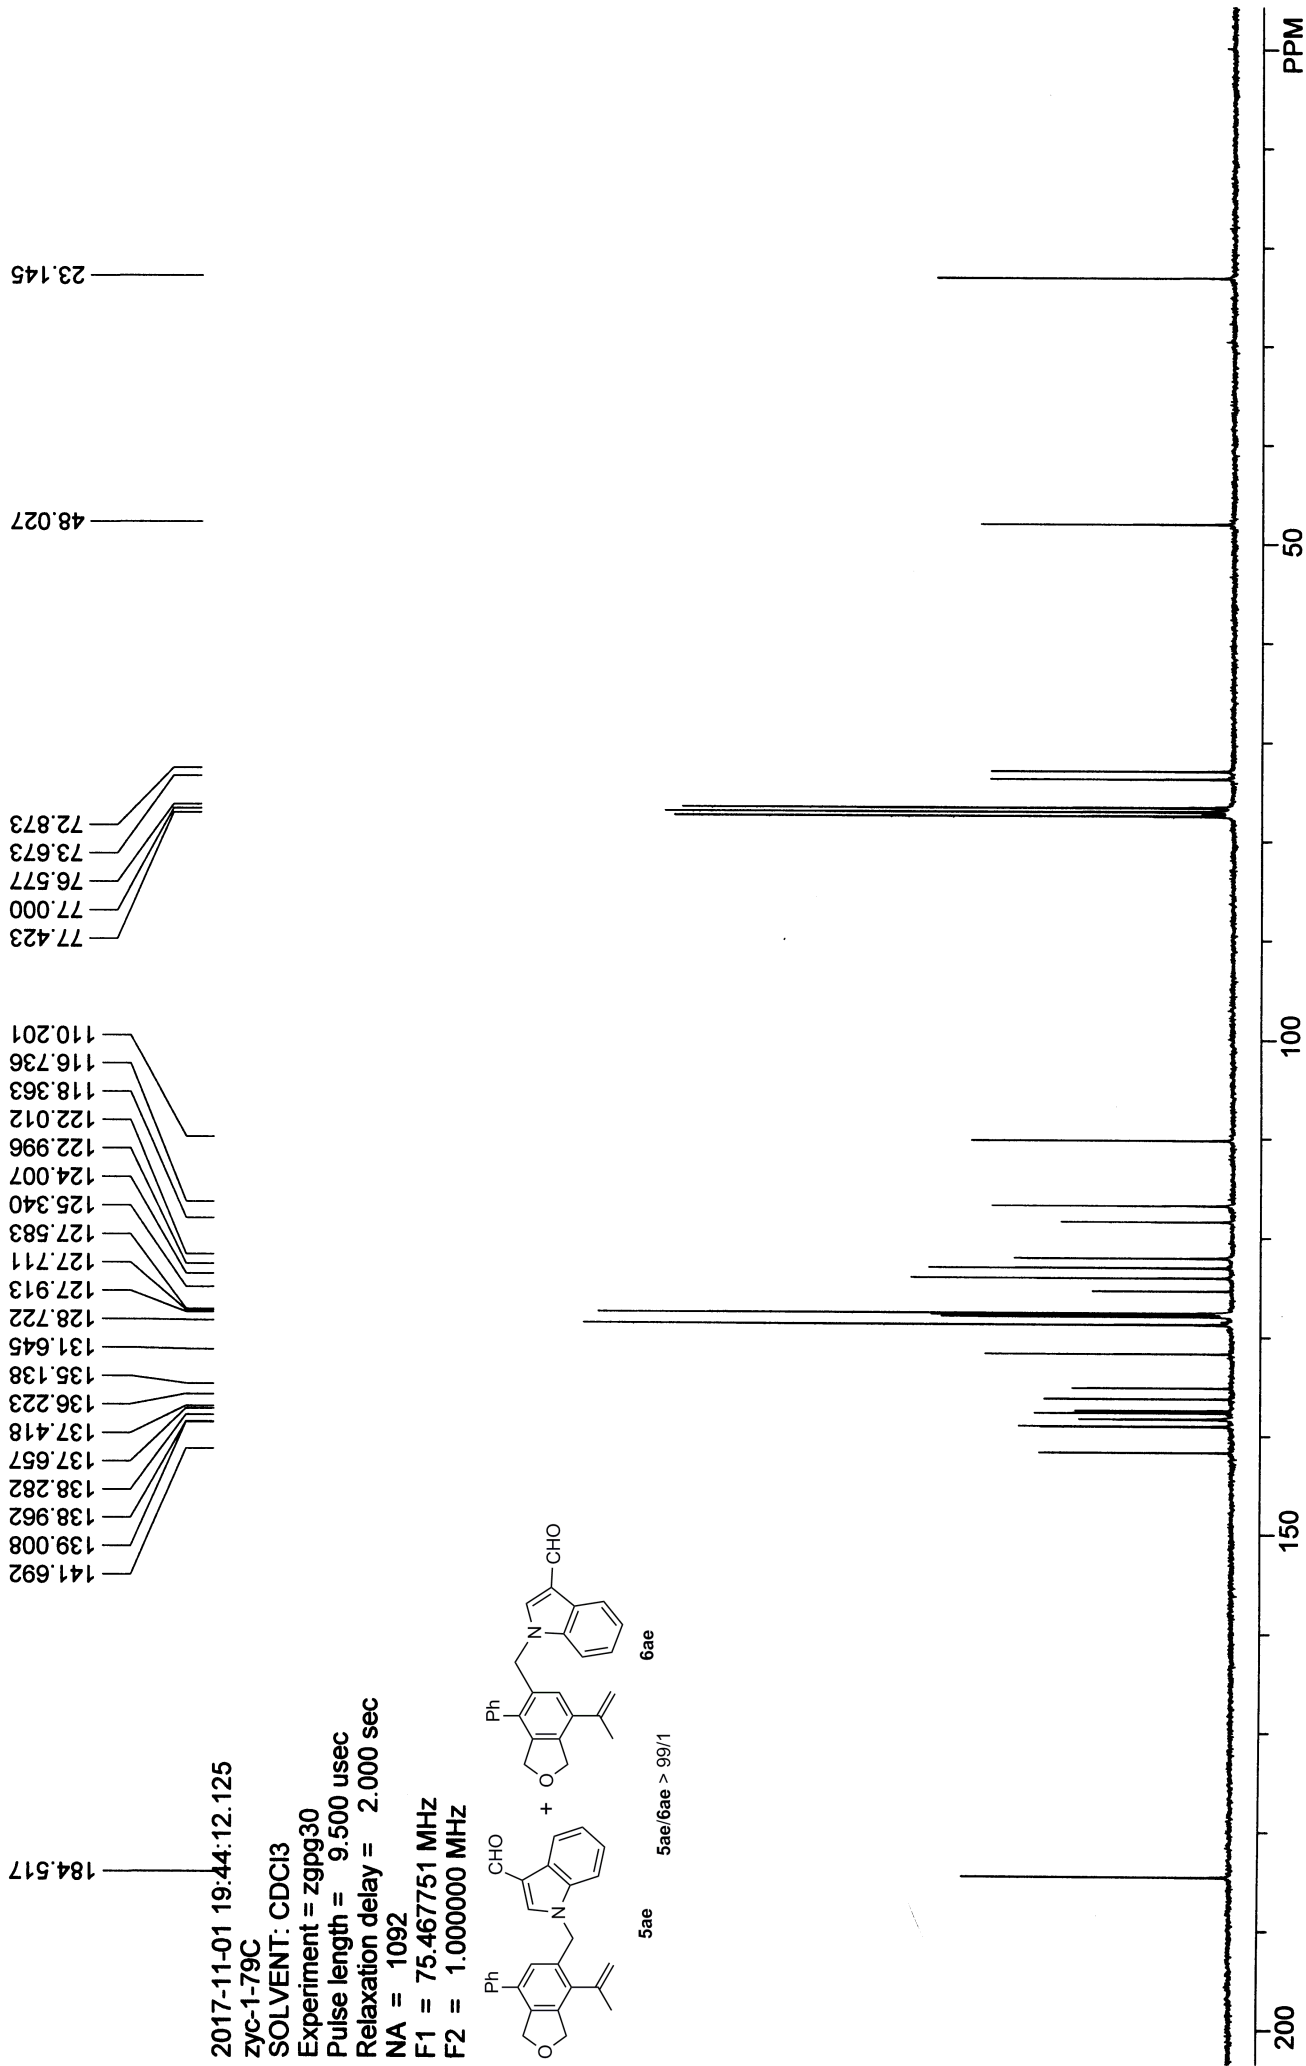





2018-01-29 18:41:36.671

zyc-1-130C

SOLVENT: CDCl<sub>3</sub>

Experiment = zgpg30

Pulse length = 9.500 usec

Relaxation delay = 2.000 sec

NA = 383

F1 = 75.467751 MHz

F2 = 1.000000 MHz

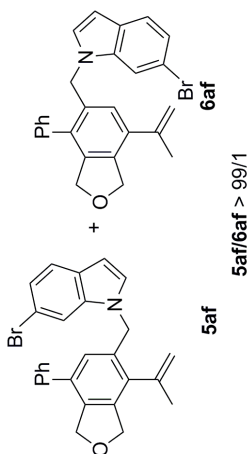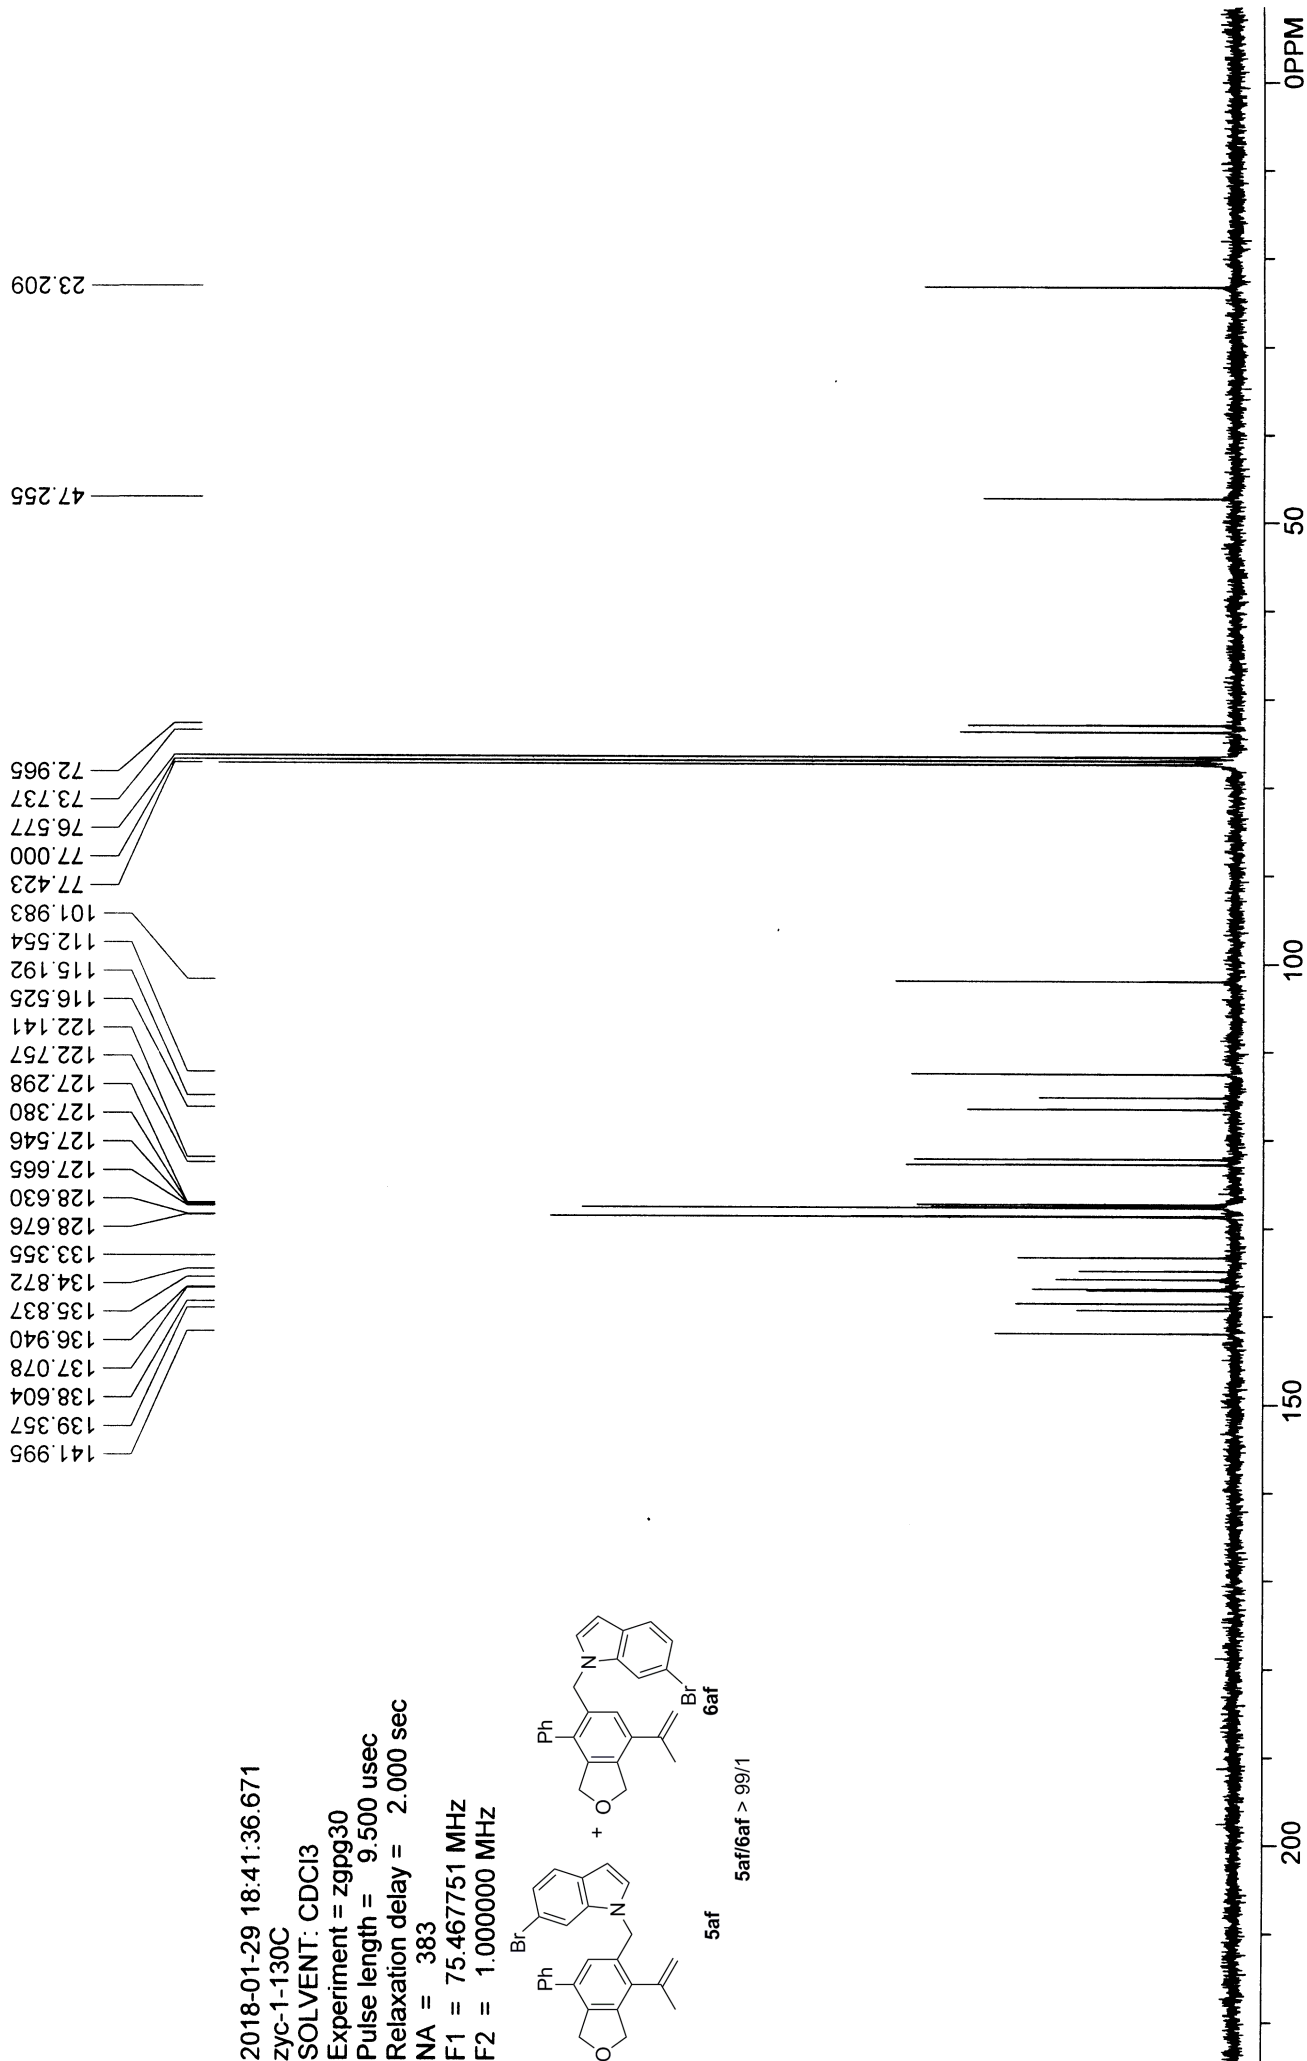

2015-11-10 15:36:28.781

wwt-2-130H

SOLVENT: CDCl3

Experiment = zg30

Pulse length = 14.000 usec

Relaxation delay = 1.000 sec

NA = 8

F1 = 300.130005 MHz

F2 = 1.000000 MHz

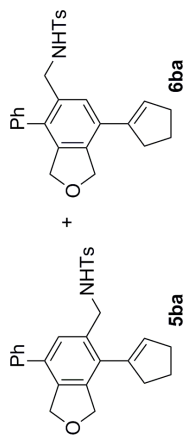

5ba/6ba = 98/2

875

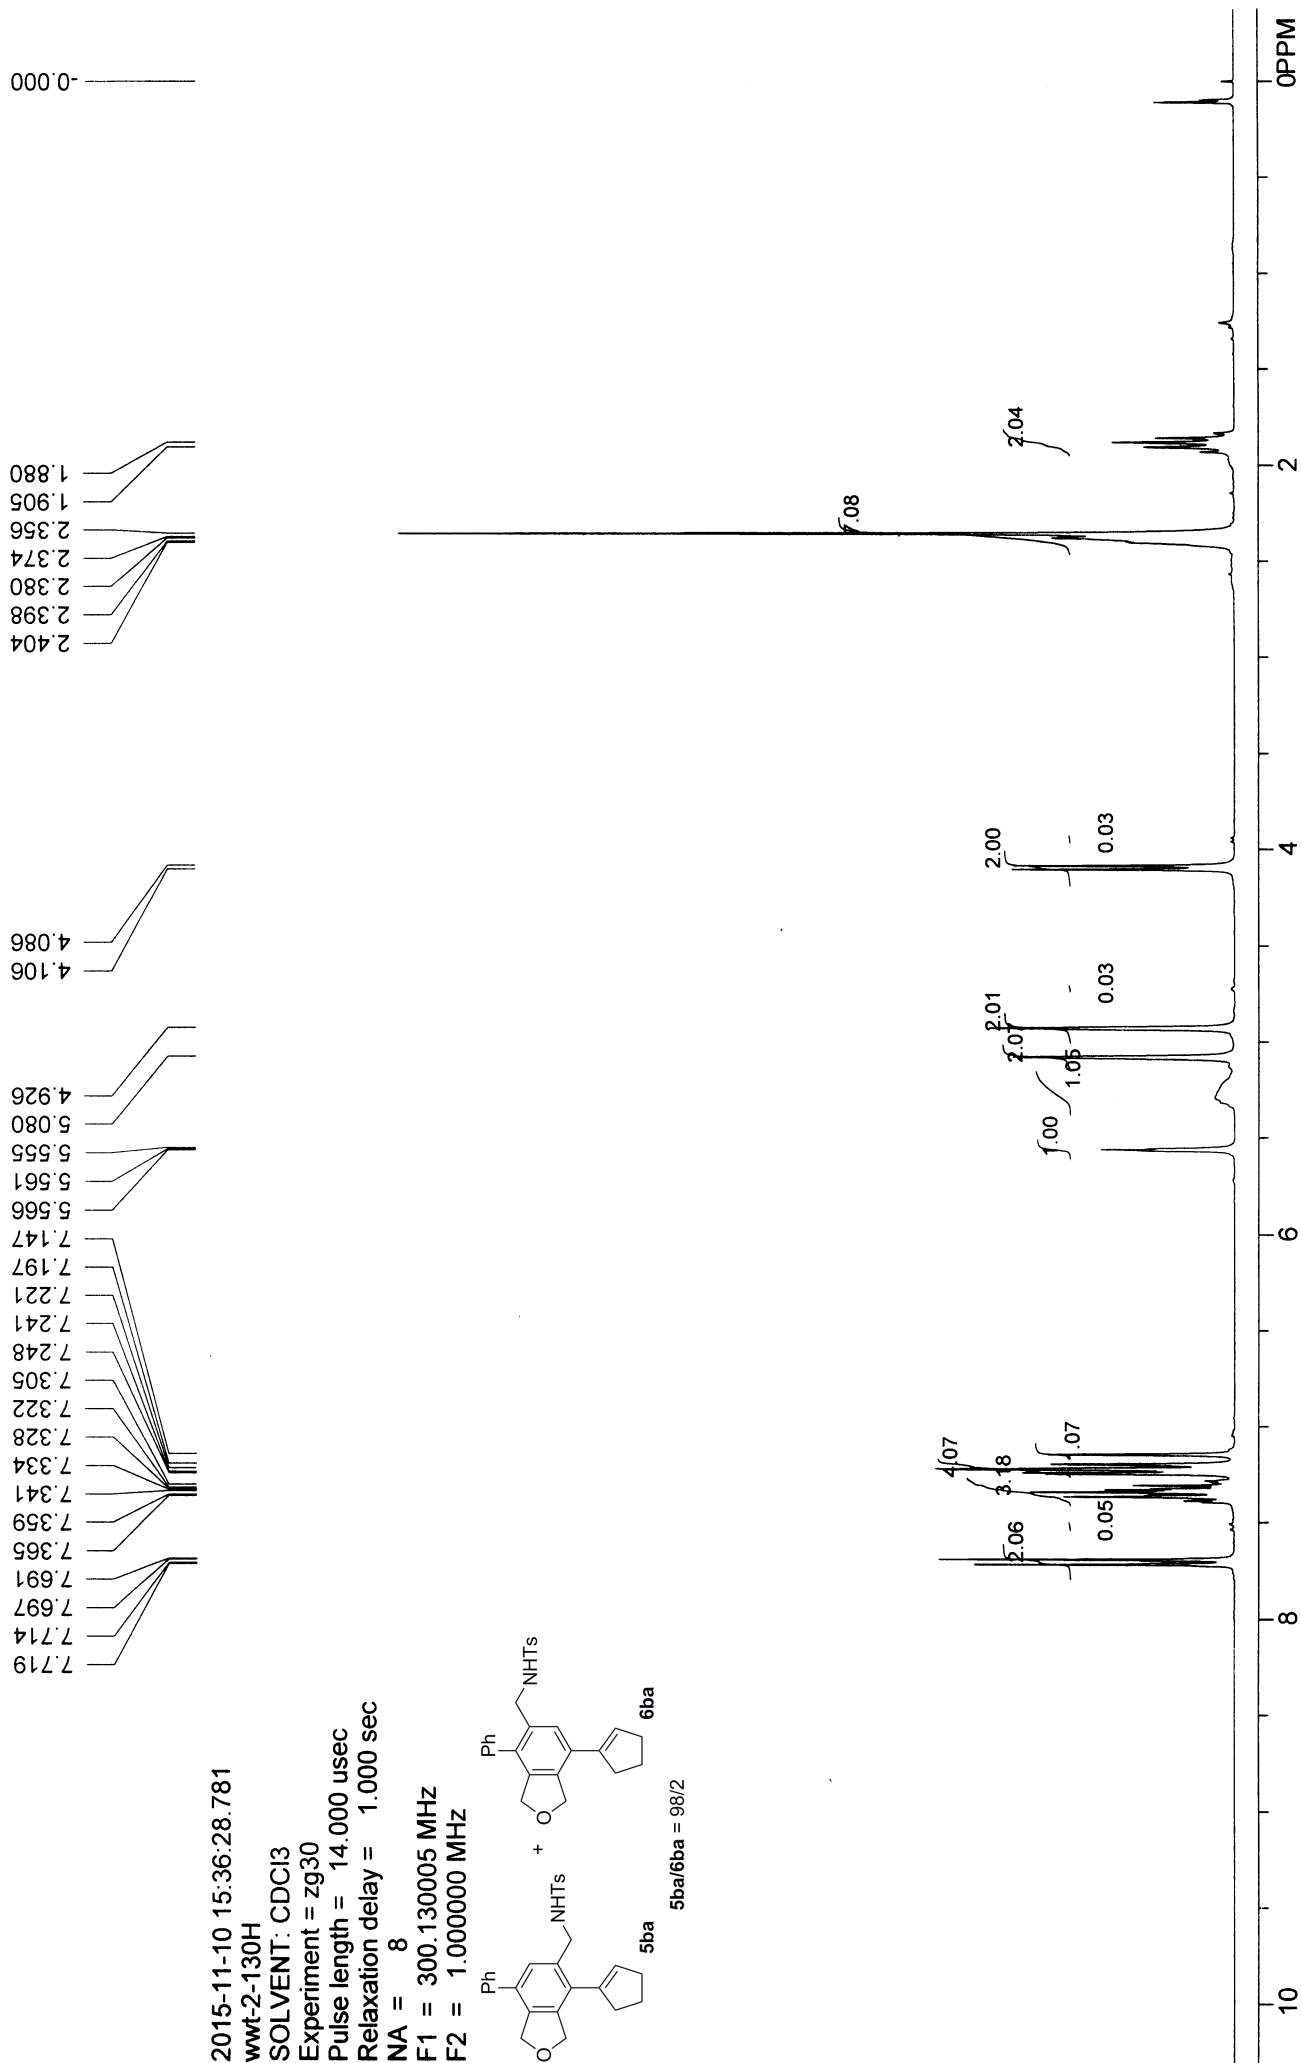

2015-11-10 15:14:08.968

wwt-2-130C

SOLVENT: CDCl<sub>3</sub>

Experiment = zgpg30

Pulse length = 9.500 usec

Relaxation delay = 2.000 sec

NA = 129

F1 = 75.467751 MHz

F2 = 1.000000 MHz

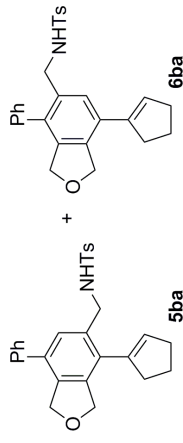

579

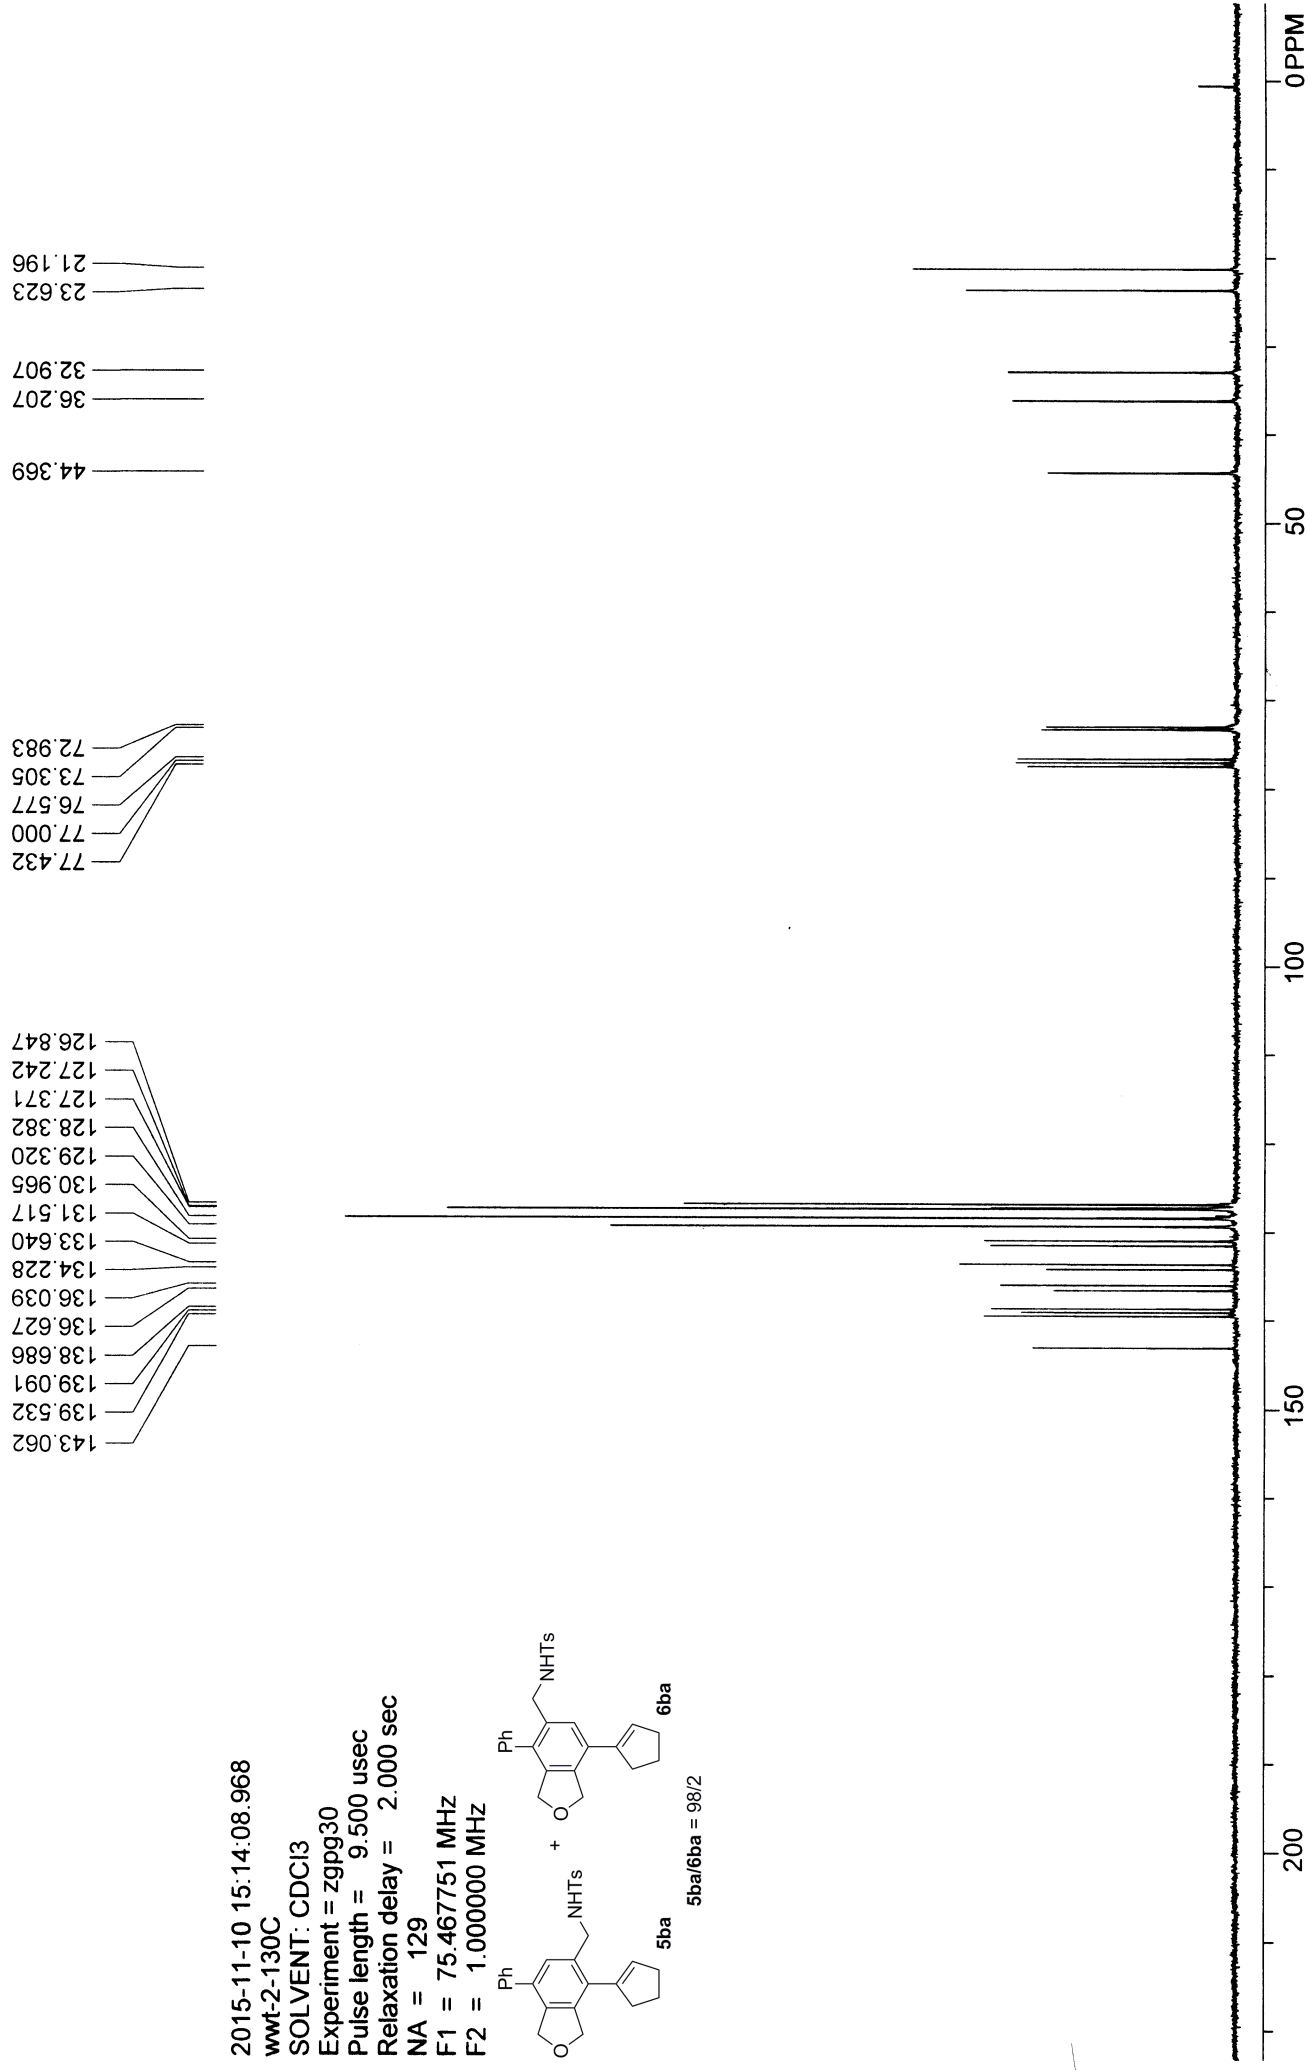

2015-11-11 21:45:40.765  
wwt-2-130re  
SOLVENT: CDCl<sub>3</sub>  
Experiment = zg30  
Pulse length = 14.000 usec  
Relaxation delay = 1.000 sec  
NA = 8  
F1 = 300.130005 MHz  
F2 = 1.000000 MHz

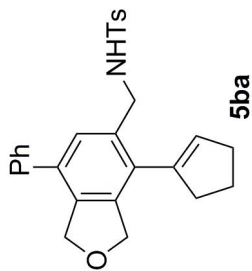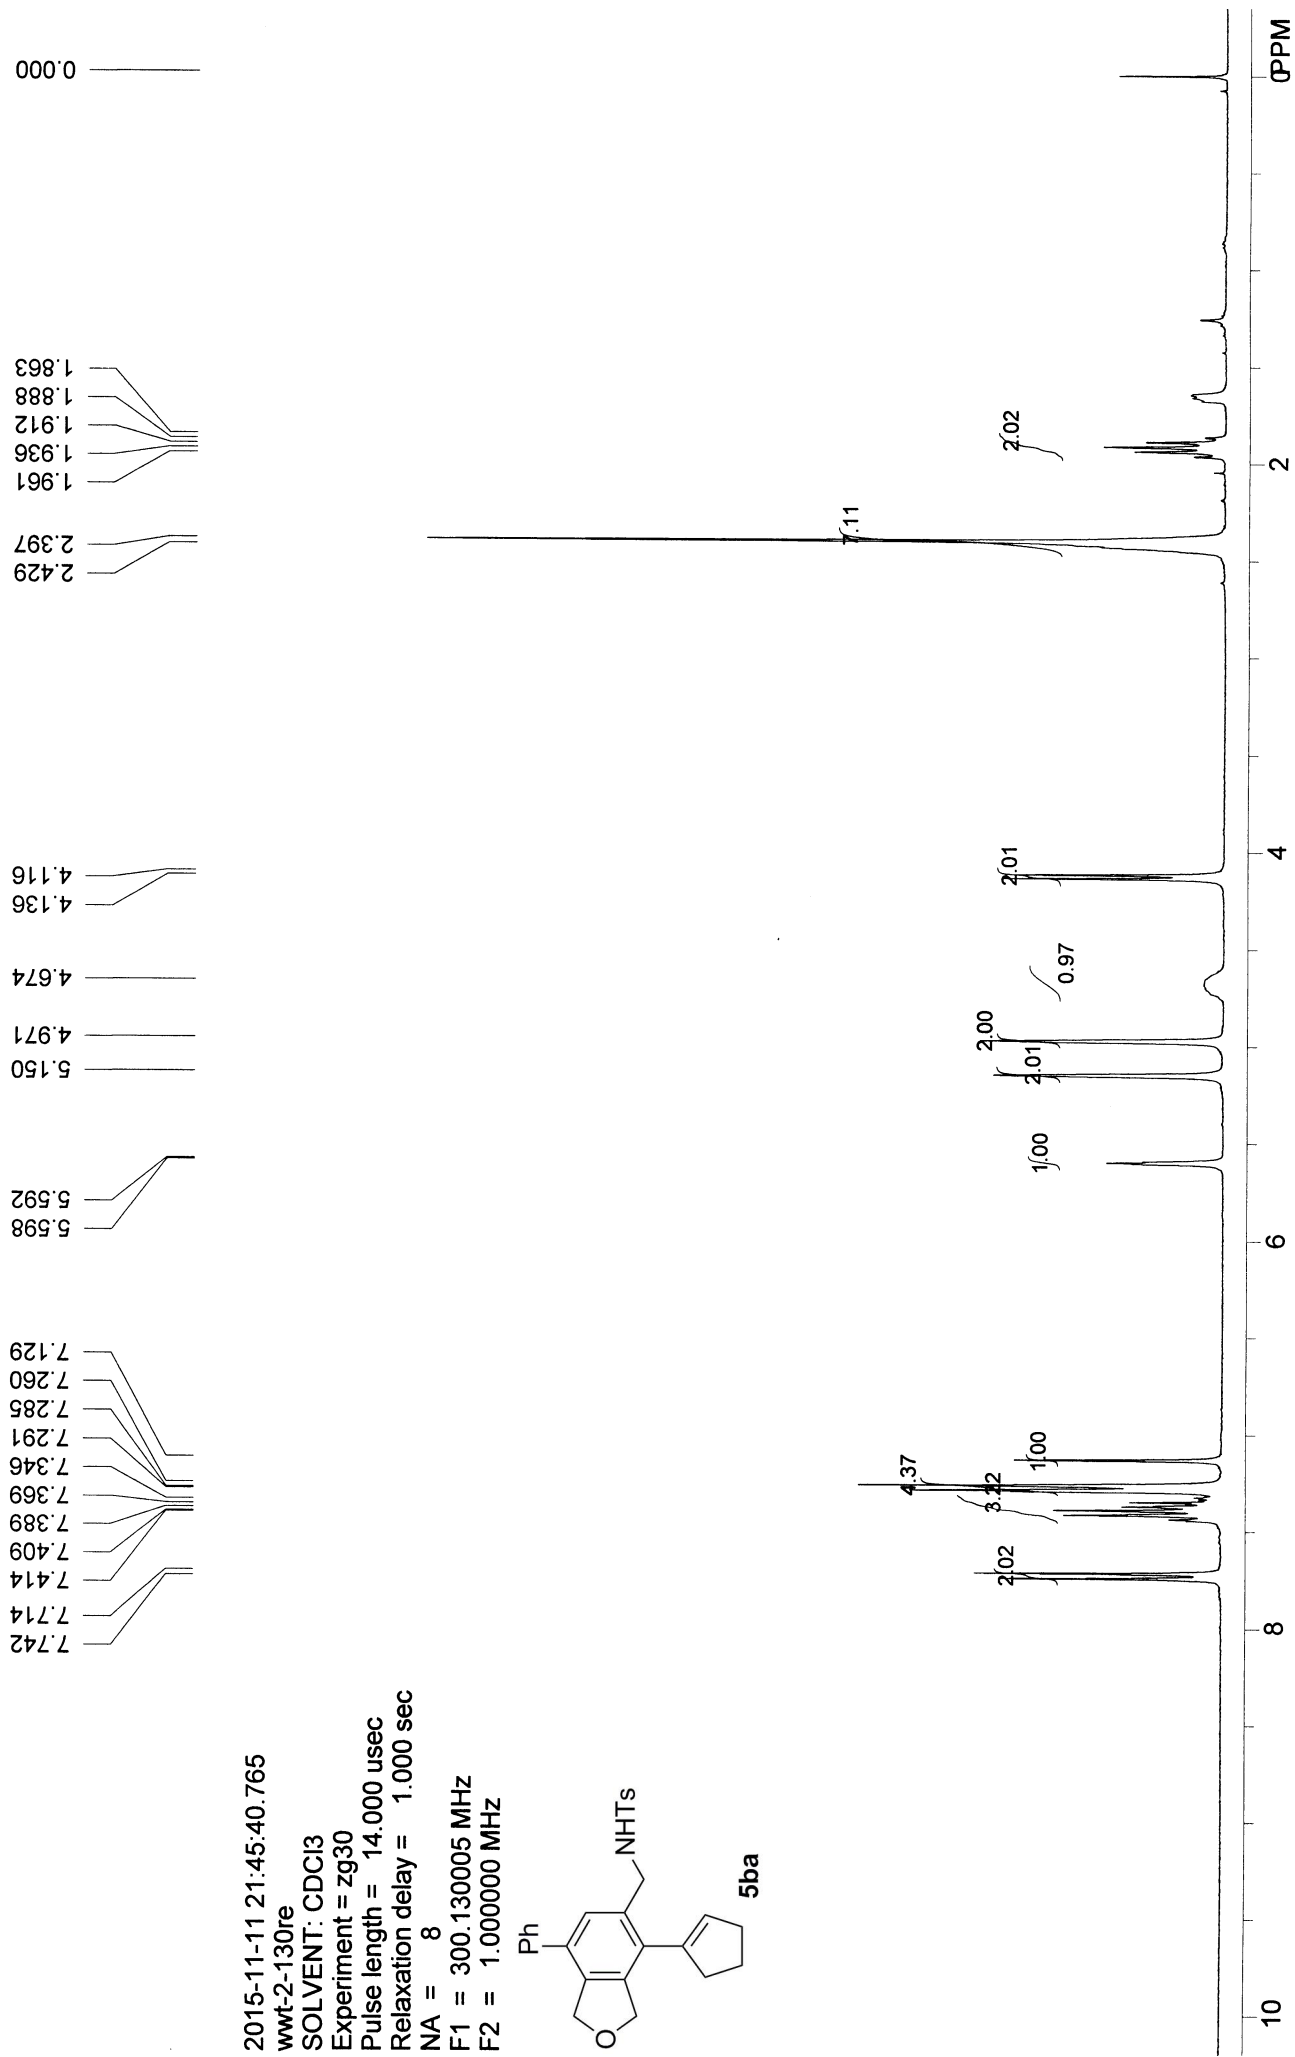

2018-11-26 11:20:24.718

zyc-3-38H

SOLVENT: CDCl3

Experiment = zg30

Pulse length = 14.000 usec

Relaxation delay = 1.000 sec

NA = 8

F1 = 300.130005 MHz

F2 = 1.000000 MHz

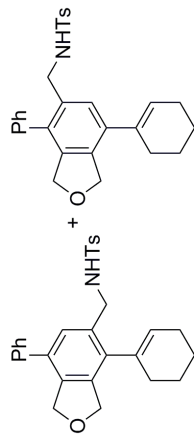

188

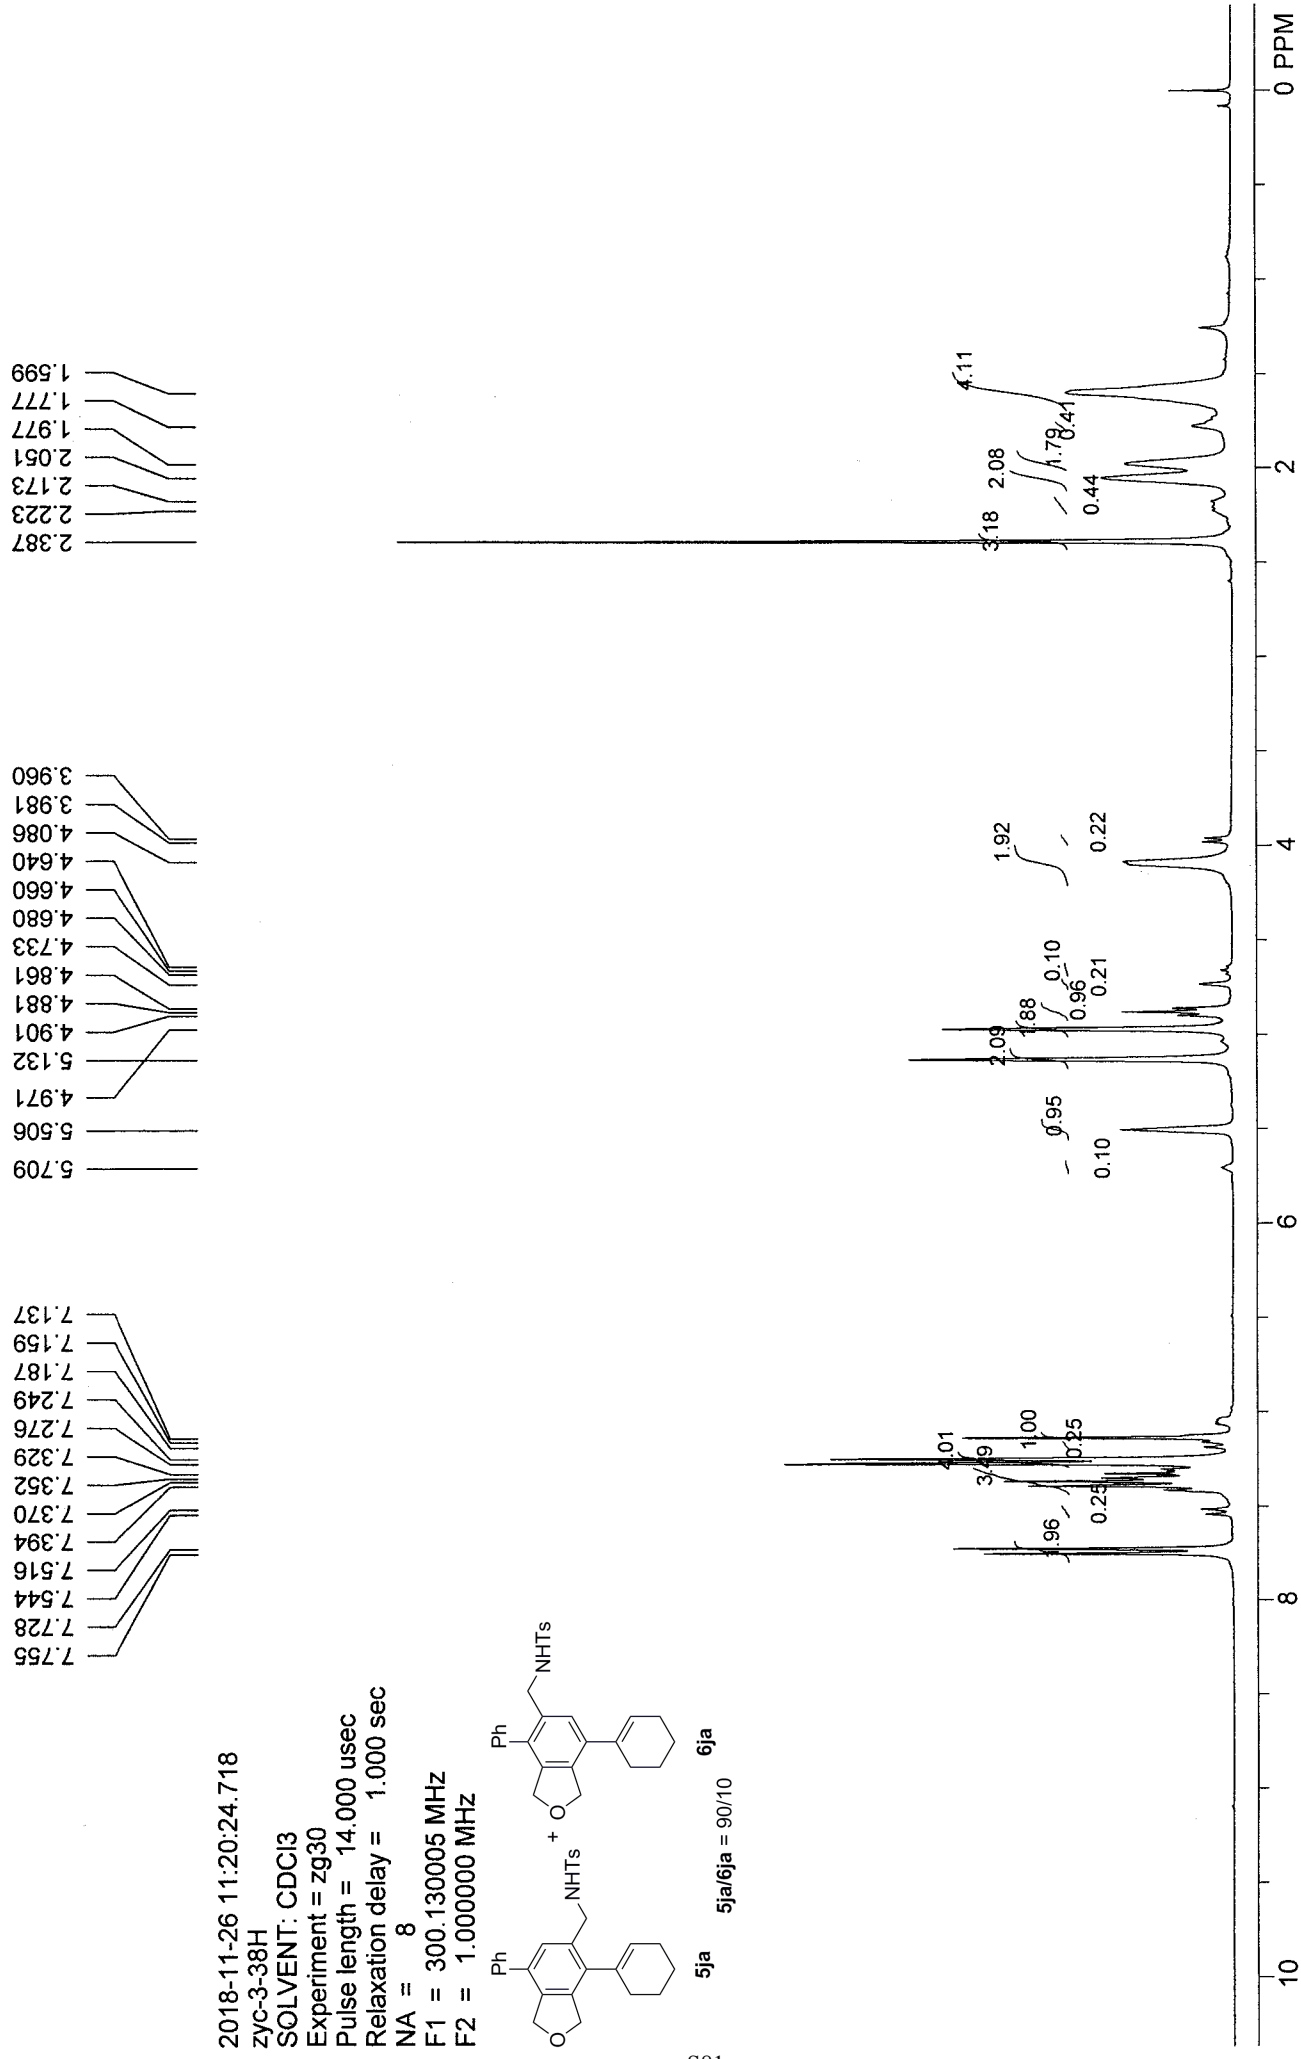

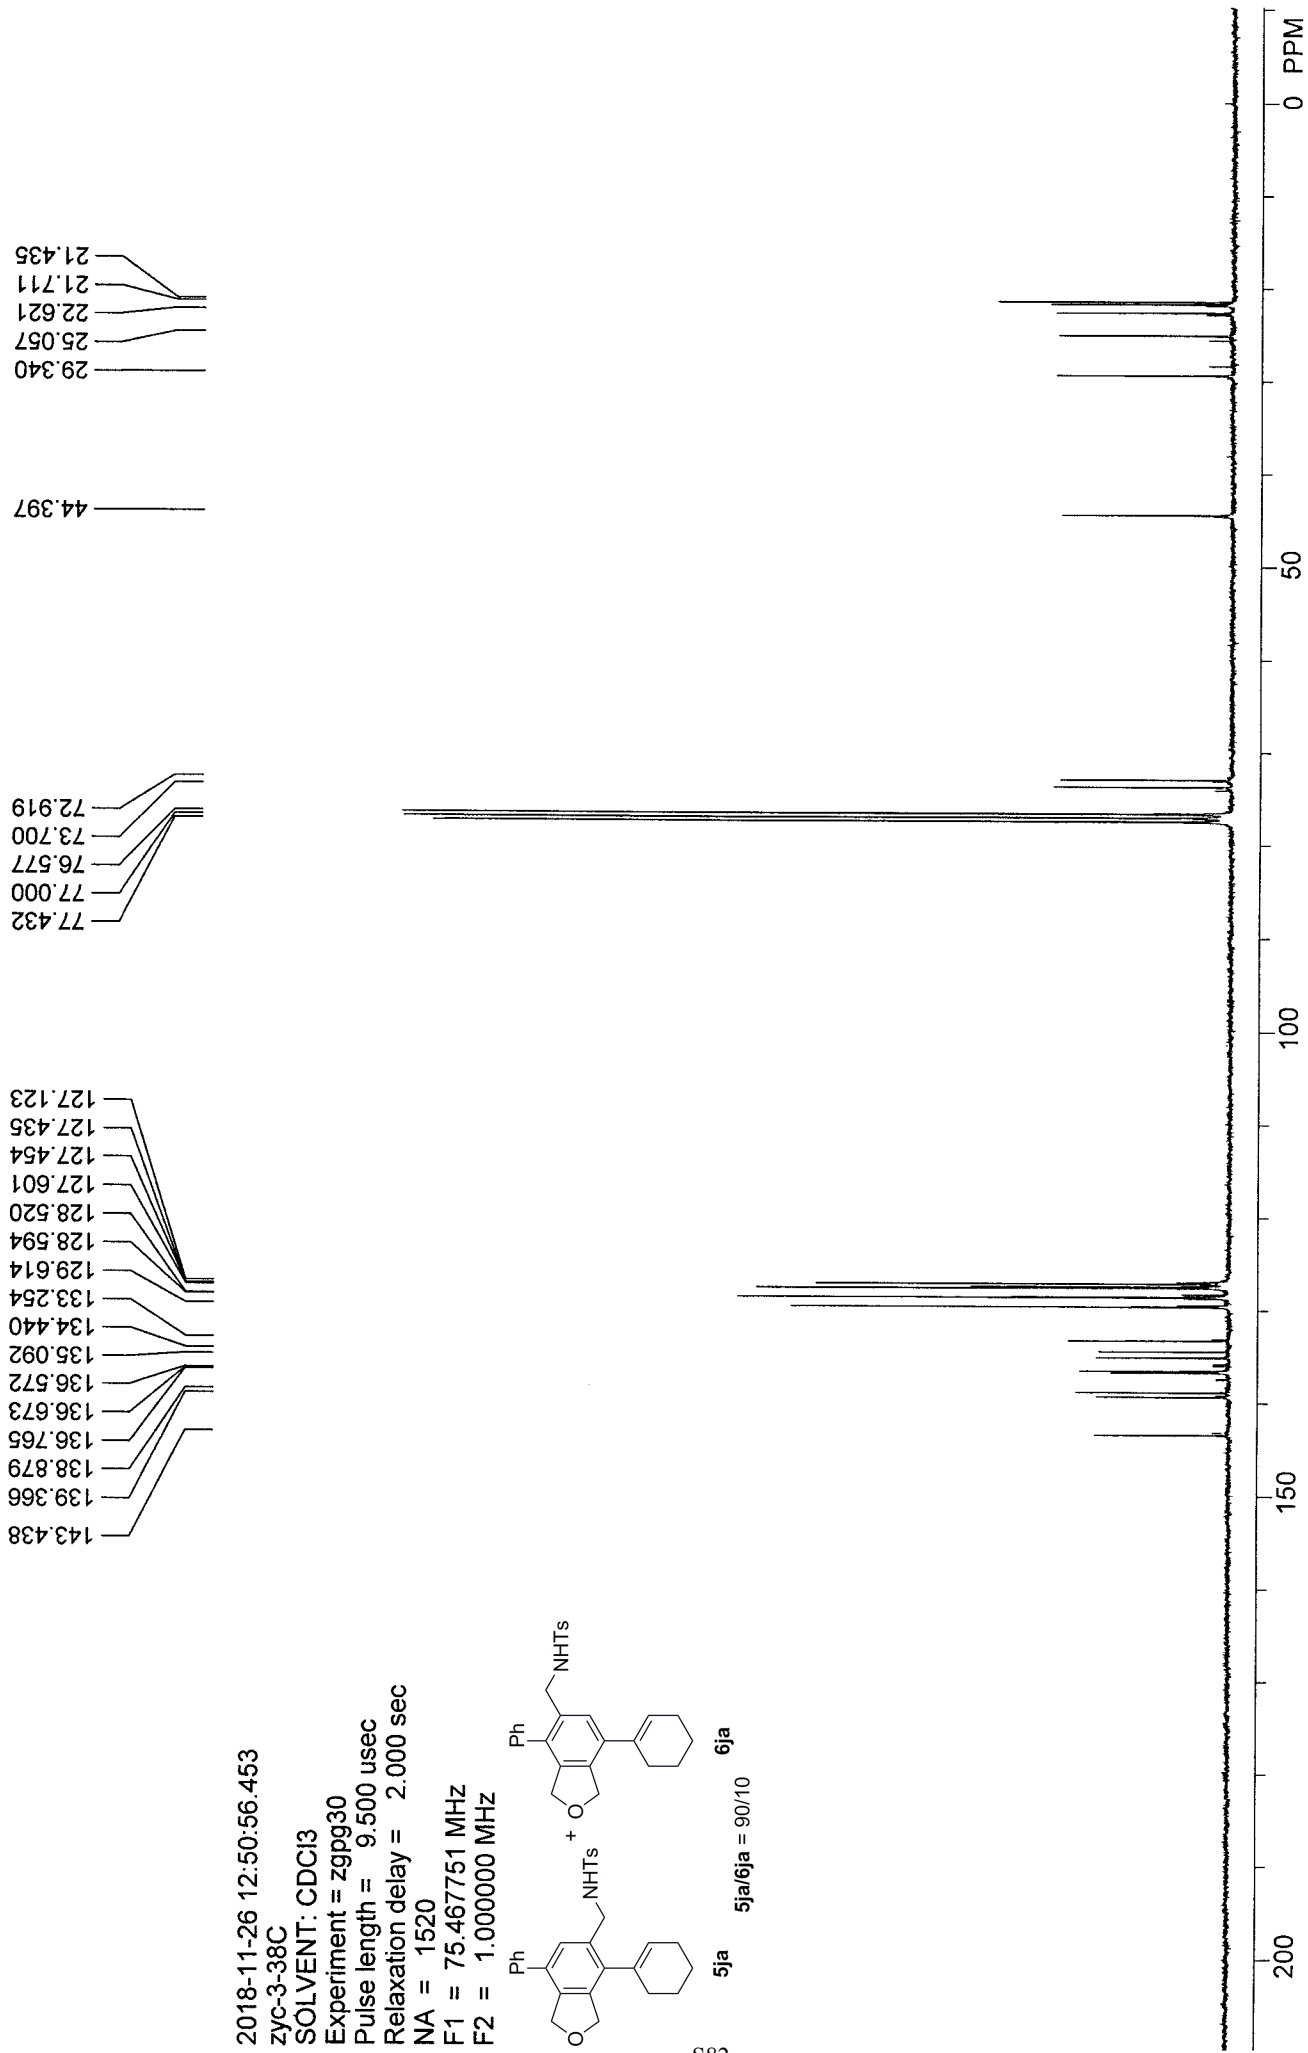

2018-09-18 22:27:02.932

cfsy-zy-138

SOLVENT: CDCl<sub>3</sub>

Experiment = zg30

Pulse length = 10.000 usec

Relaxation delay = 5.000 sec

NA = 4

F1 = 400.130005 MHz

F2 = 1.000000 MHz

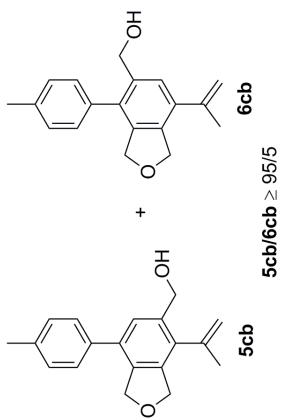

583

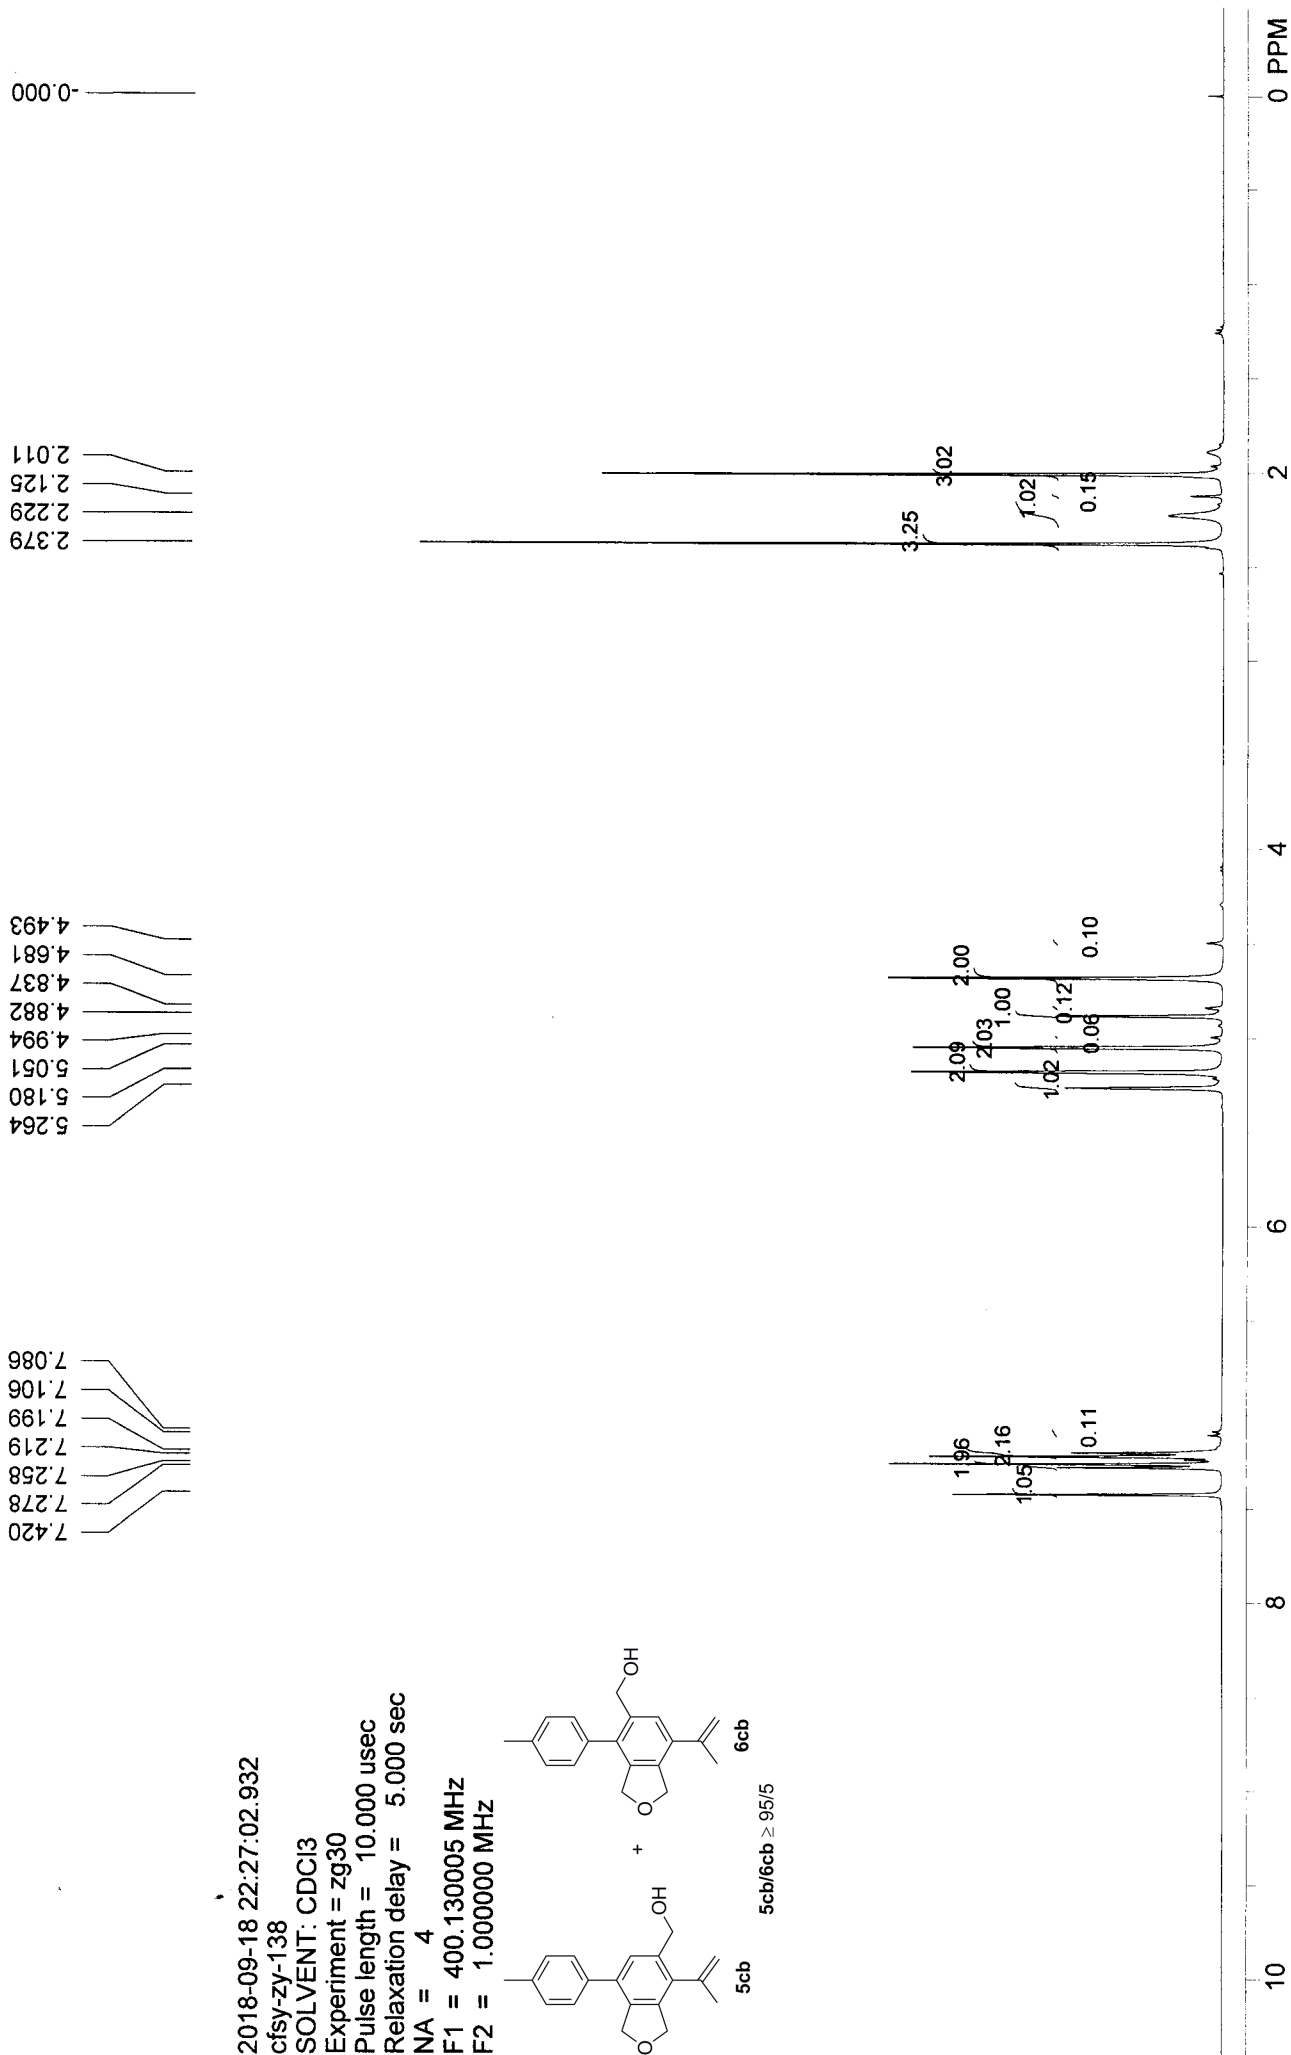

2018-09-18 22:34:58.797

cfsy-zy-138

SOLVENT: CDCl<sub>3</sub>

Experiment = zgpg30

Pulse length = 10.000 usec

Relaxation delay = 2.000 sec

NA = 128

F1 = 100.612770 MHz

F2 = 1.000000 MHz

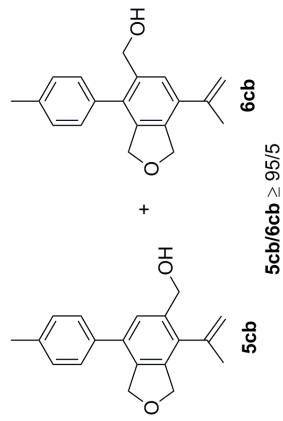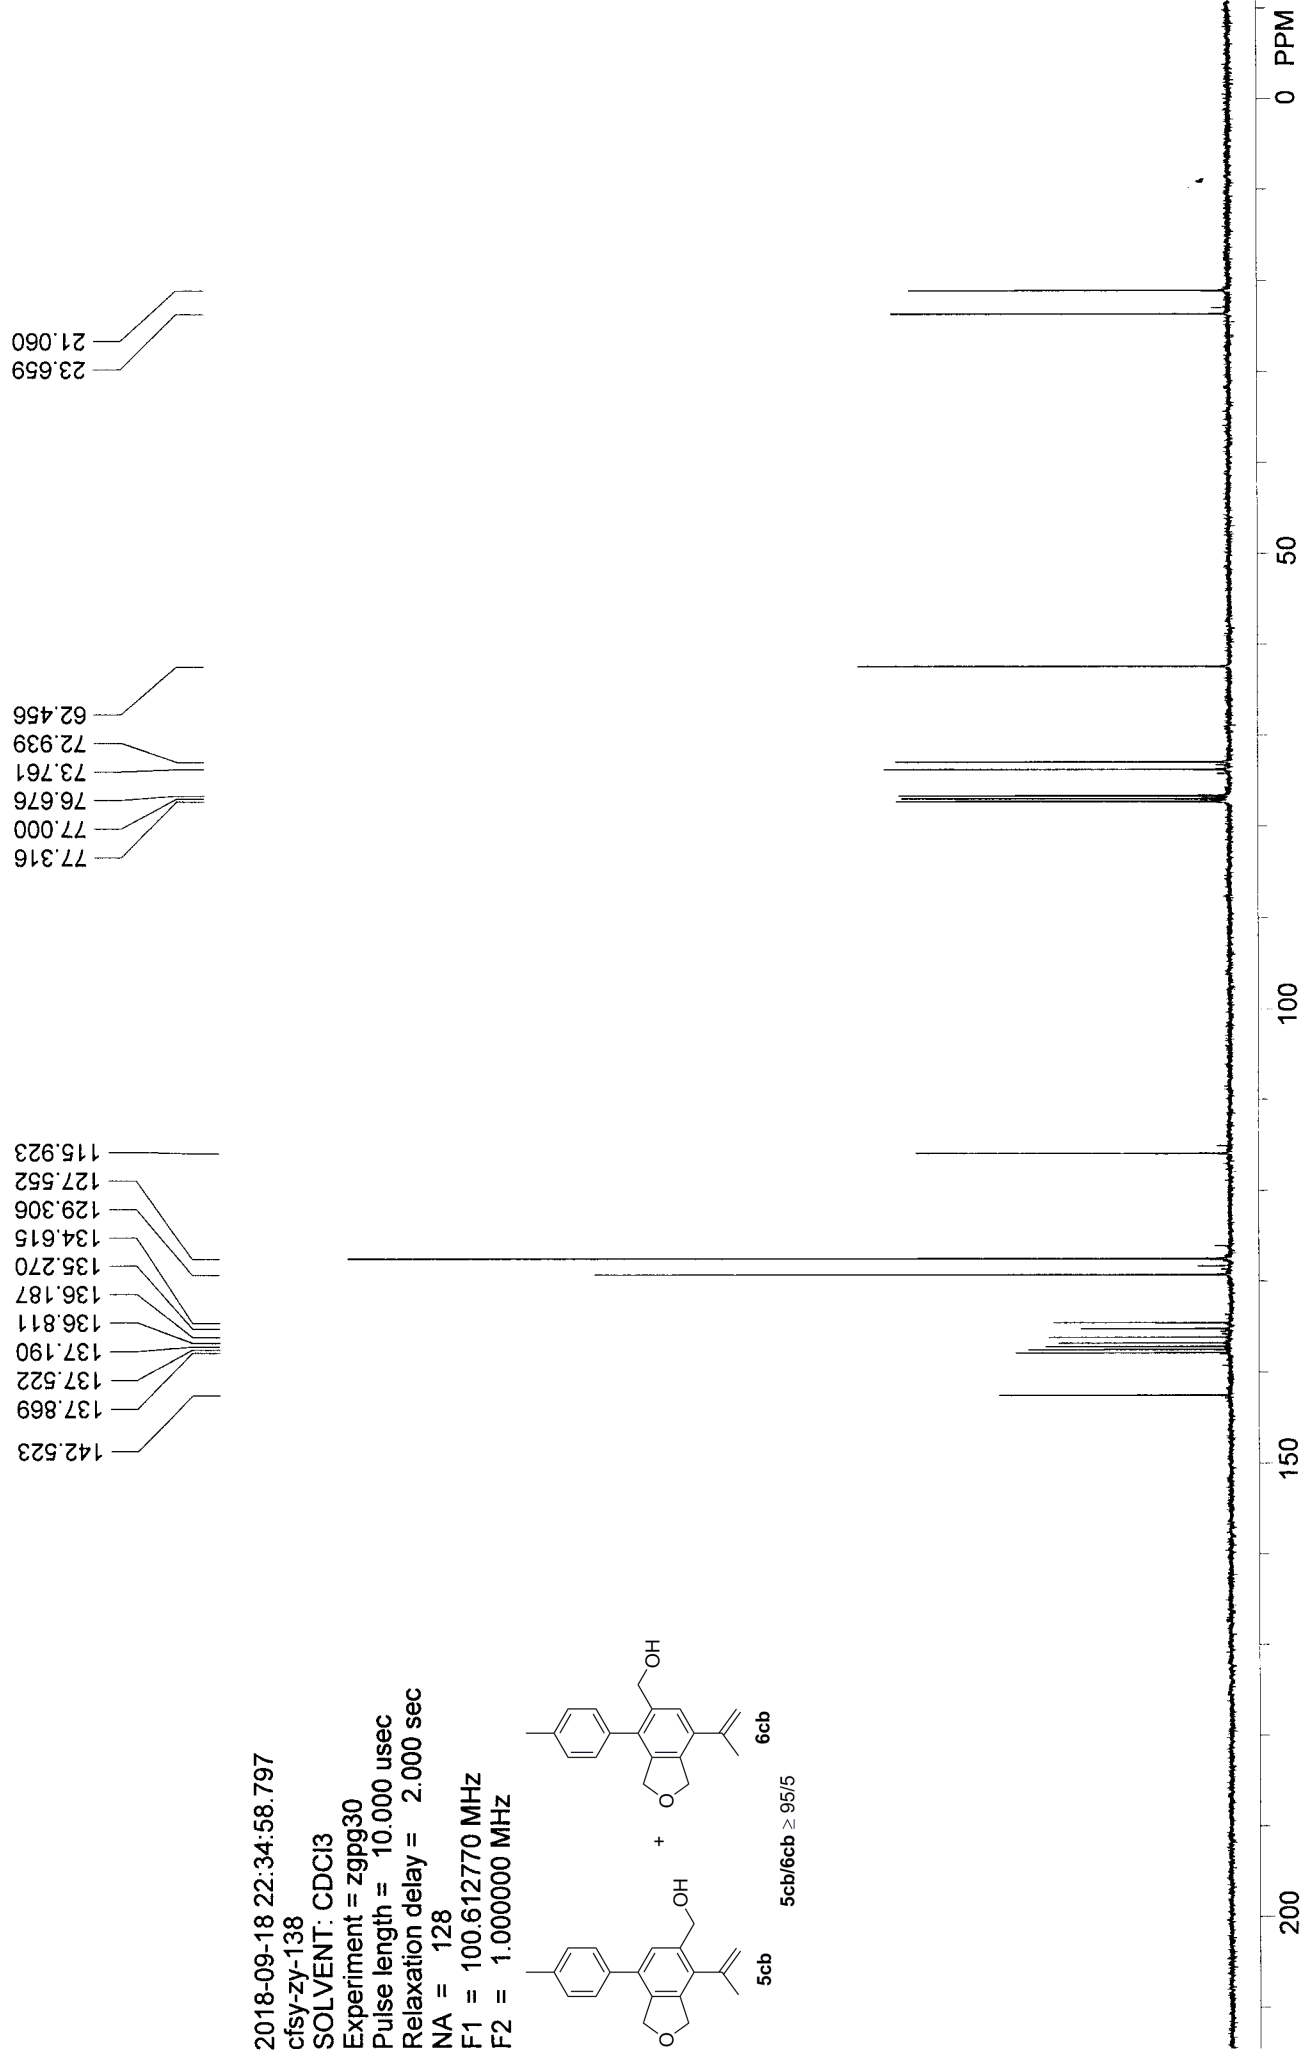



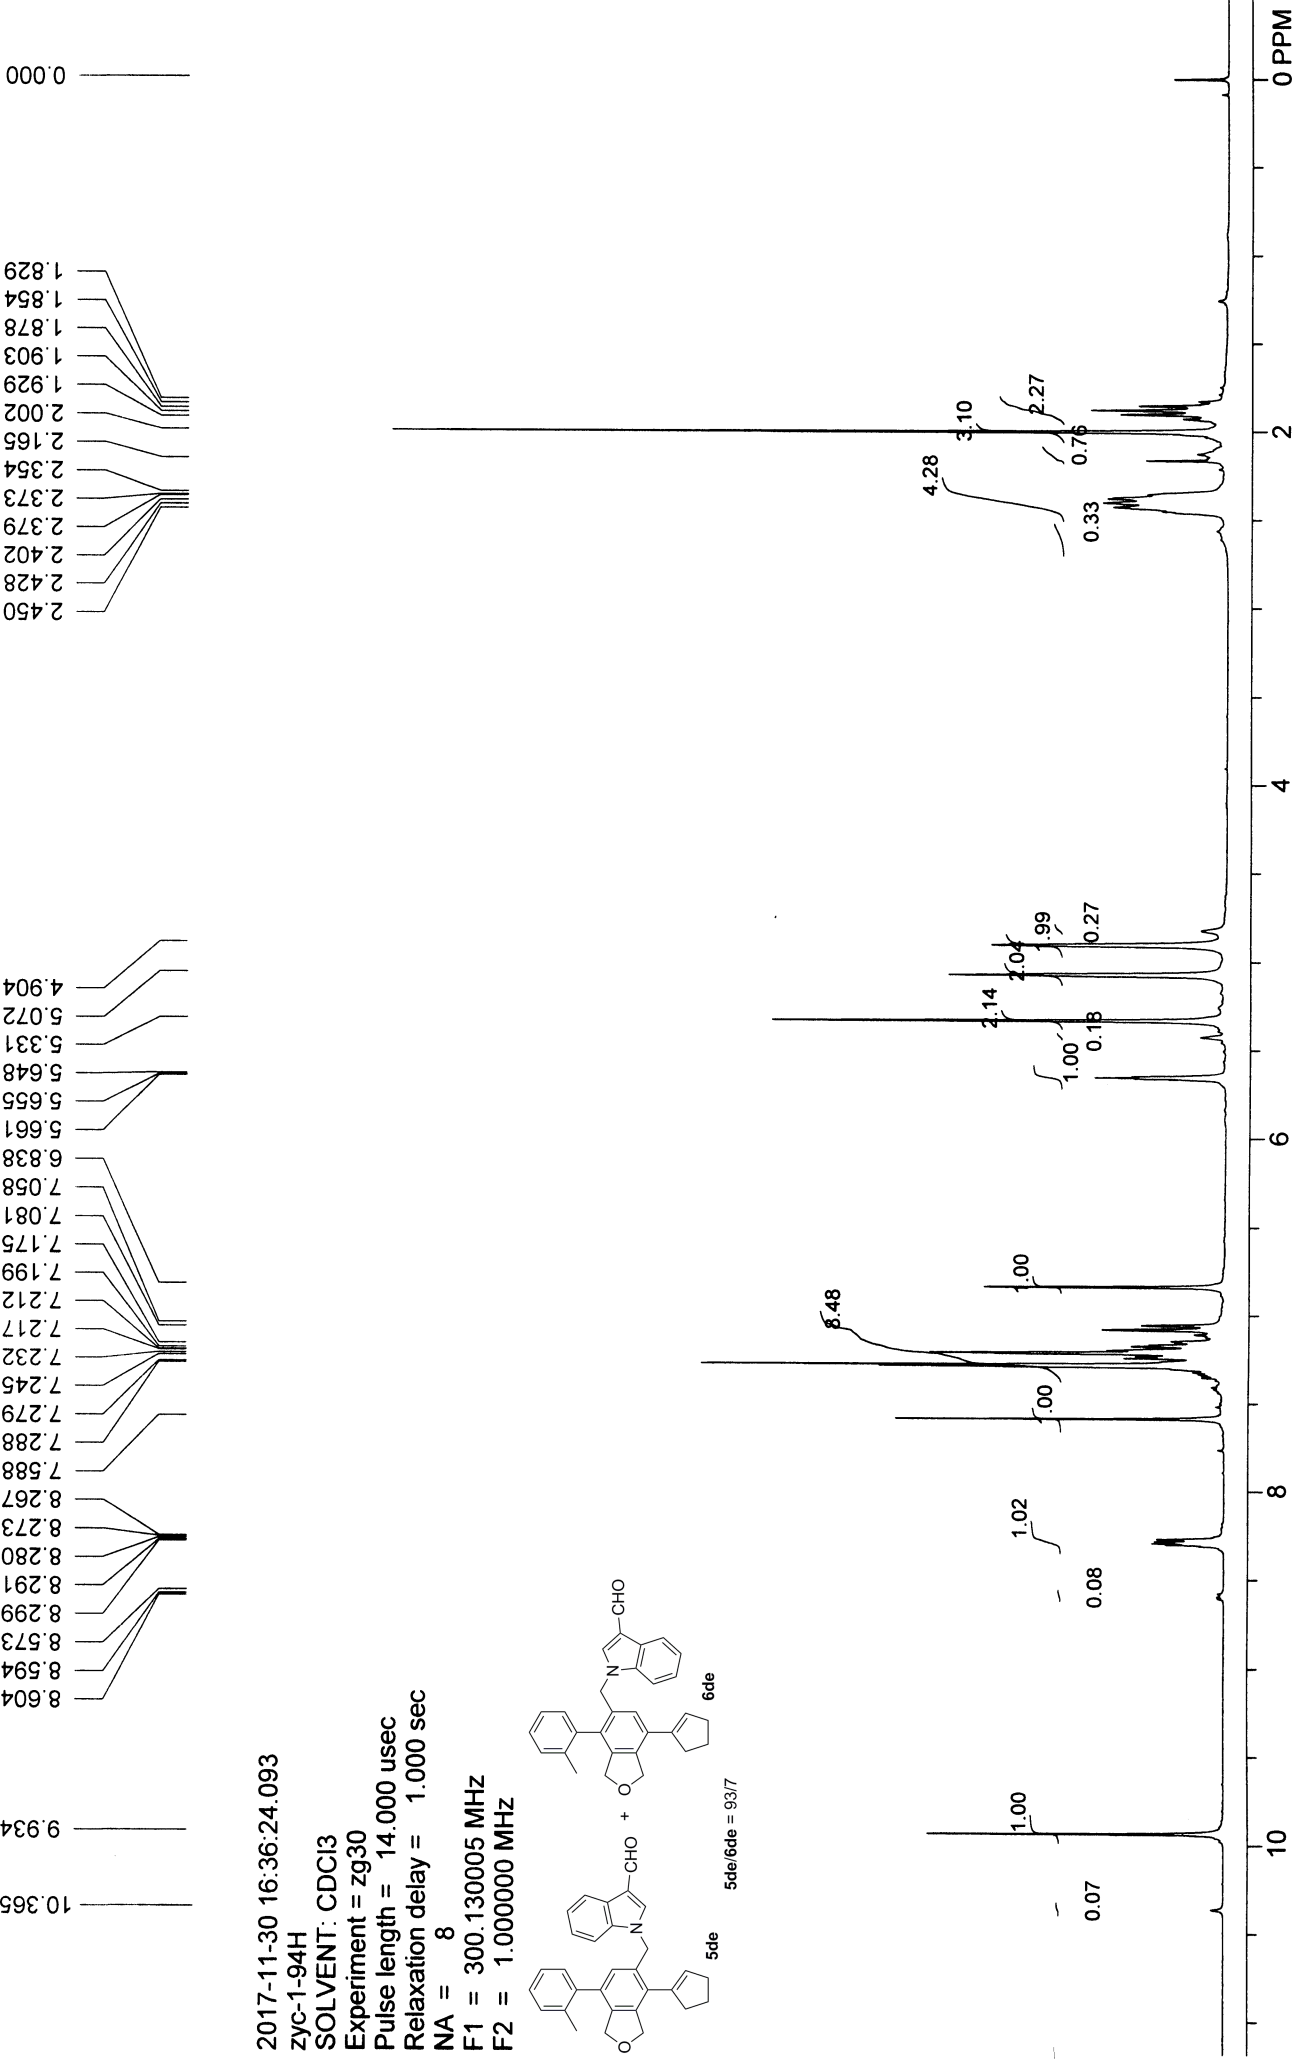

2017-11-30 16:36:24.093  
ZYC-1-94H  
SOLVENT: CDCl3  
Experiment = zg30  
Pulse length = 14.000 usec  
Relaxation delay = 1.000 sec  
NA = 8  
F1 = 300.130005 MHz  
F2 = 1.000000 MHz

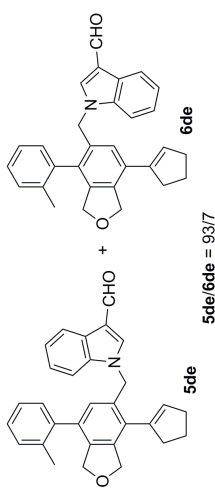

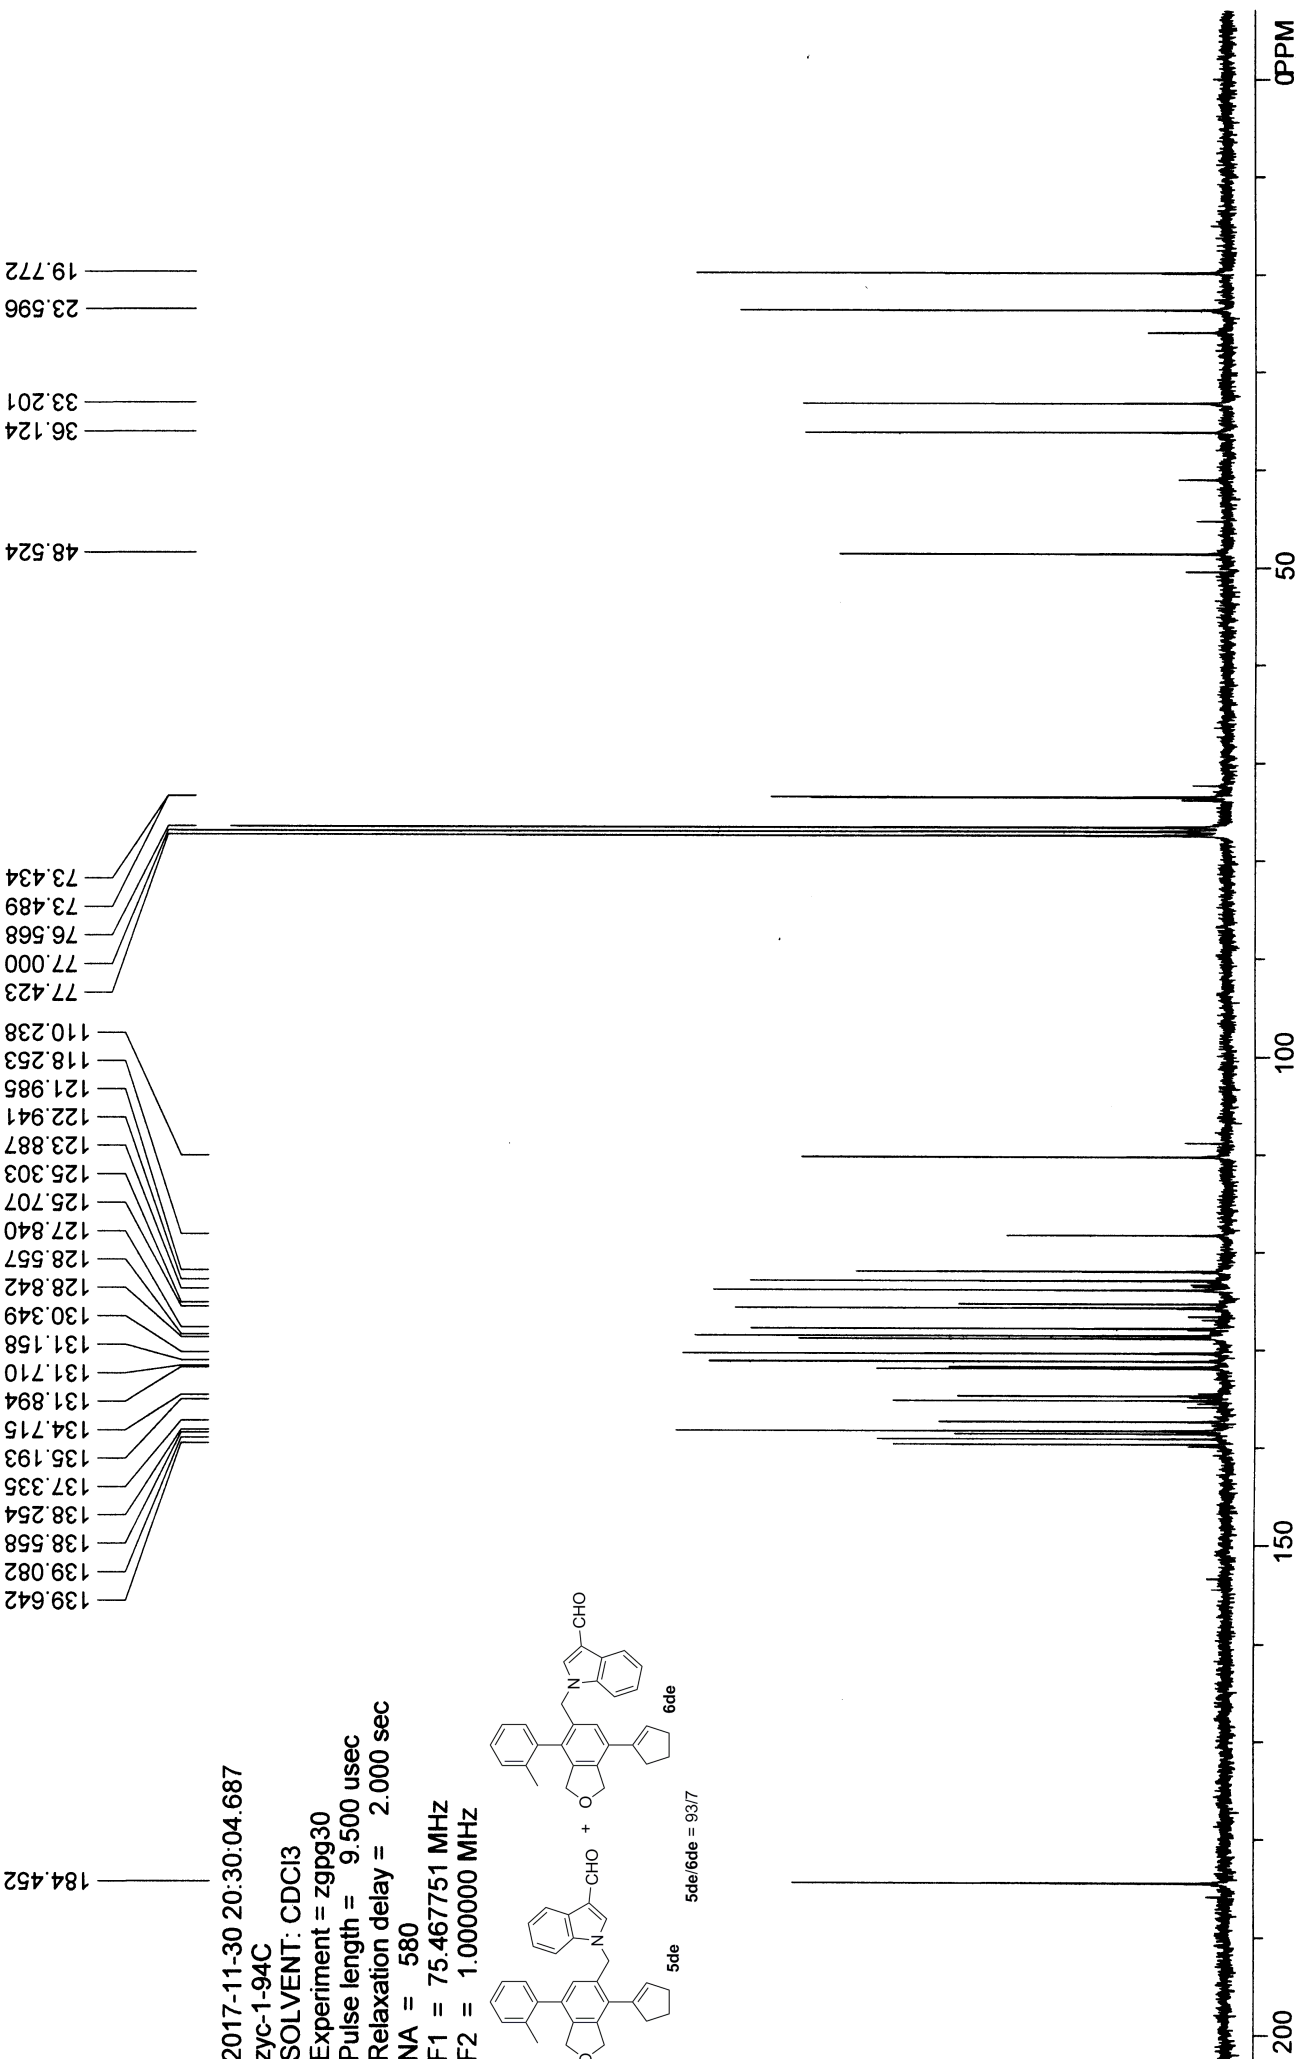

2018-01-24 11:27:41.312  
 zyc-1-94re  
 SOLVENT: CDCl3  
 Experiment = zg30  
 Pulse length = 14.000 usec  
 Relaxation delay = 1.000 sec  
 NA = 8  
 F1 = 300.130005 MHz  
 F2 = 1.000000 MHz

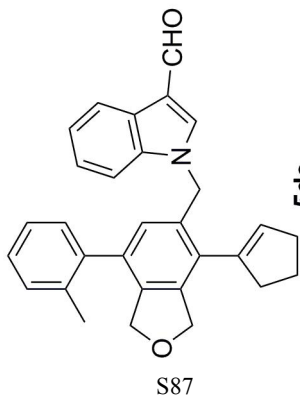

188

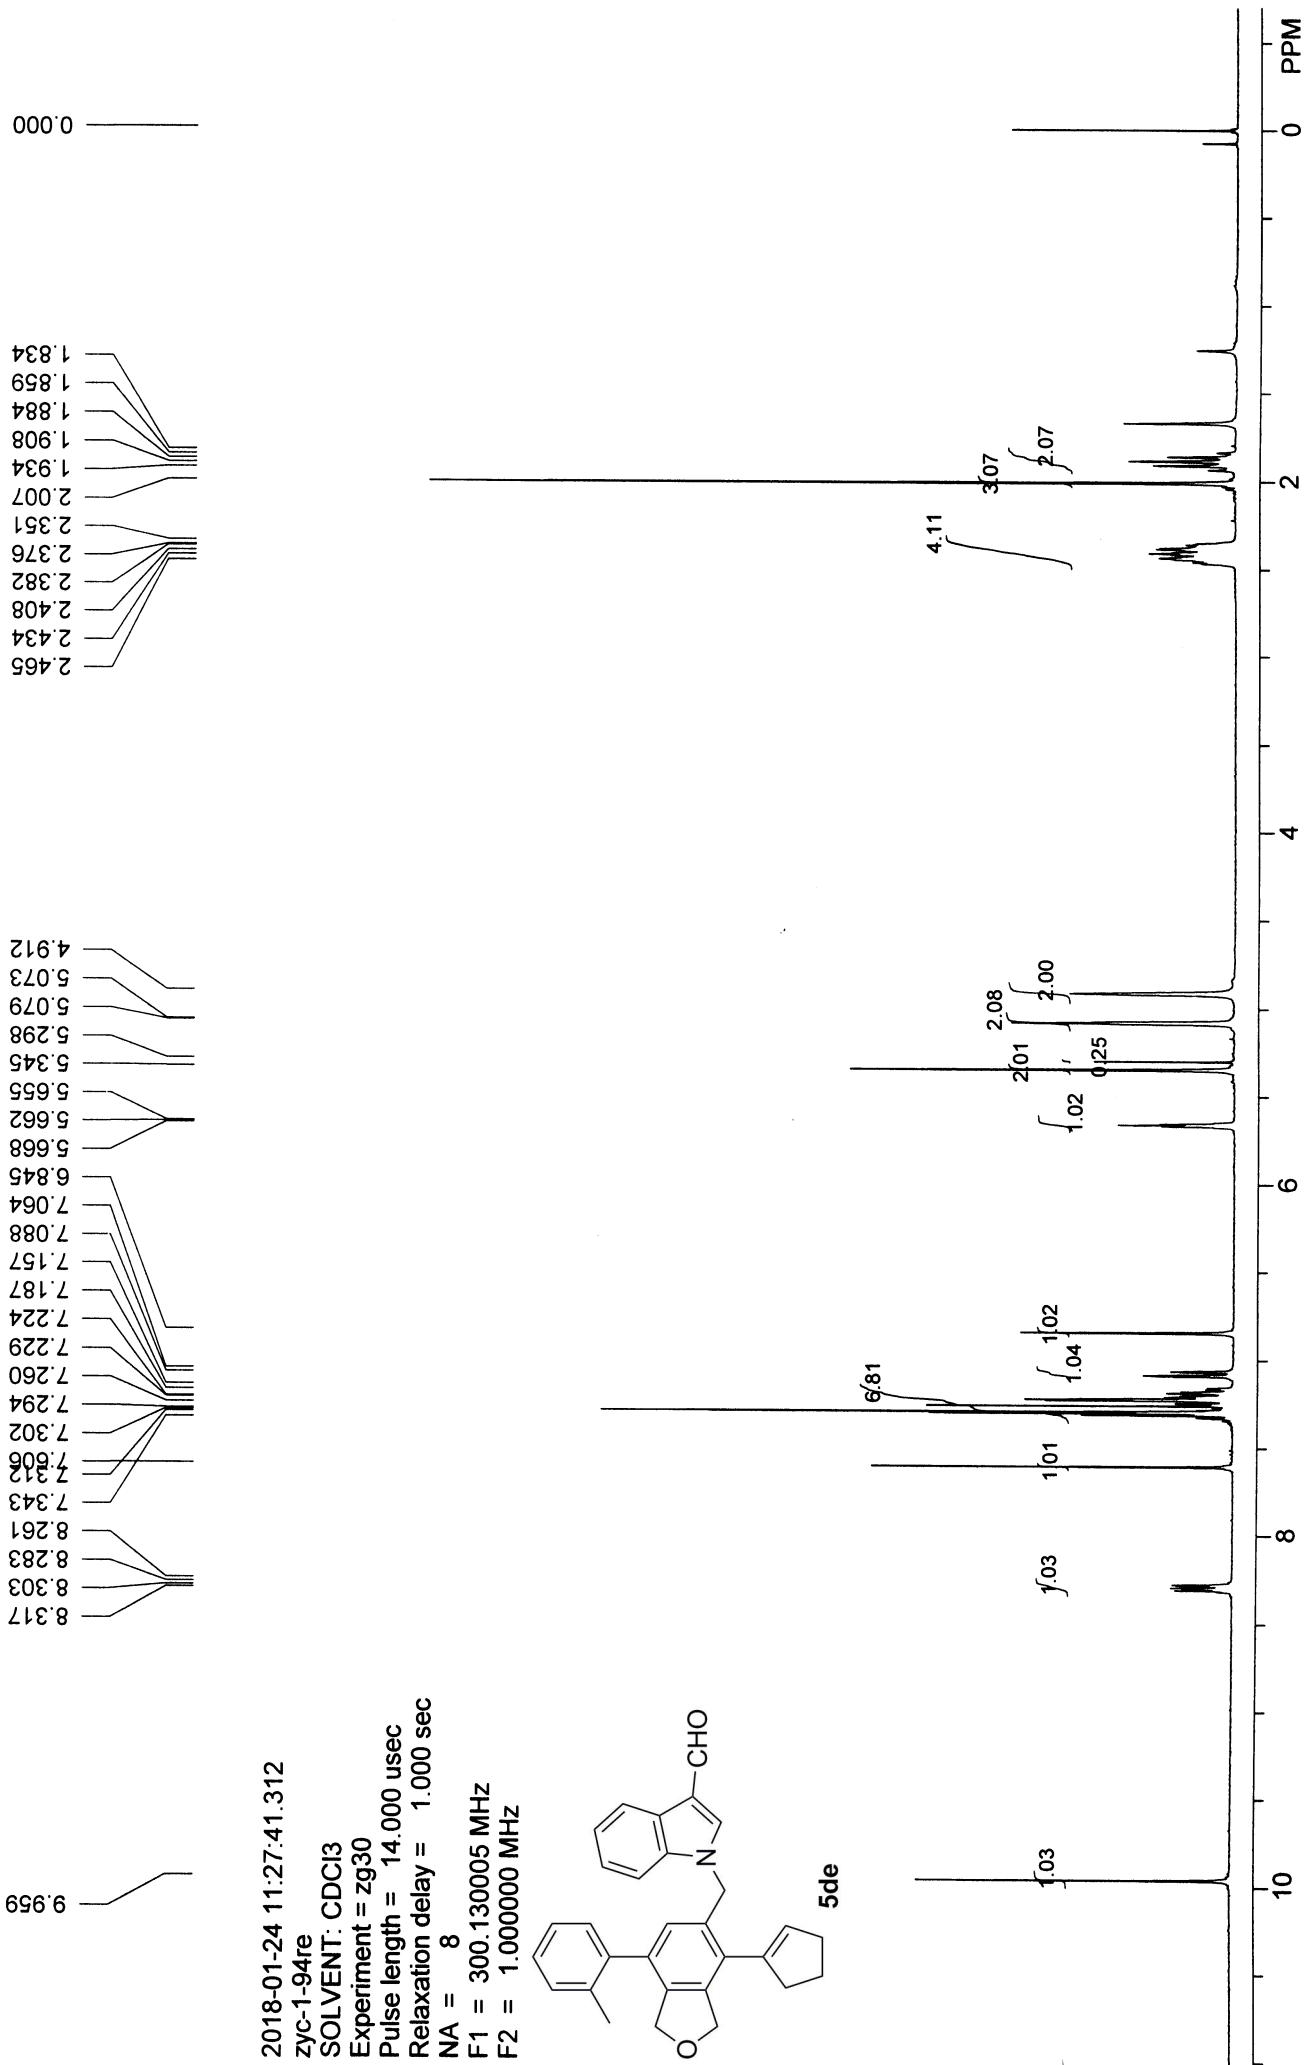

2017-12-07 21:21:13.203  
 zyc-1-101H  
 SOLVENT: CDCl3  
 Experiment = zg30  
 Pulse length = 14.000 usec  
 Relaxation delay = 1.000 sec  
 NA = 8  
 F1 = 300.130005 MHz  
 F2 = 1.000000 MHz

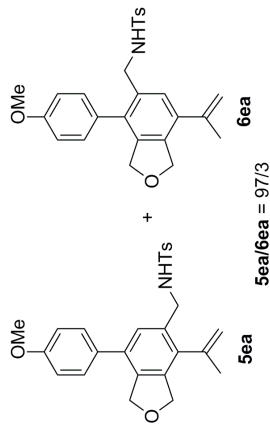

888

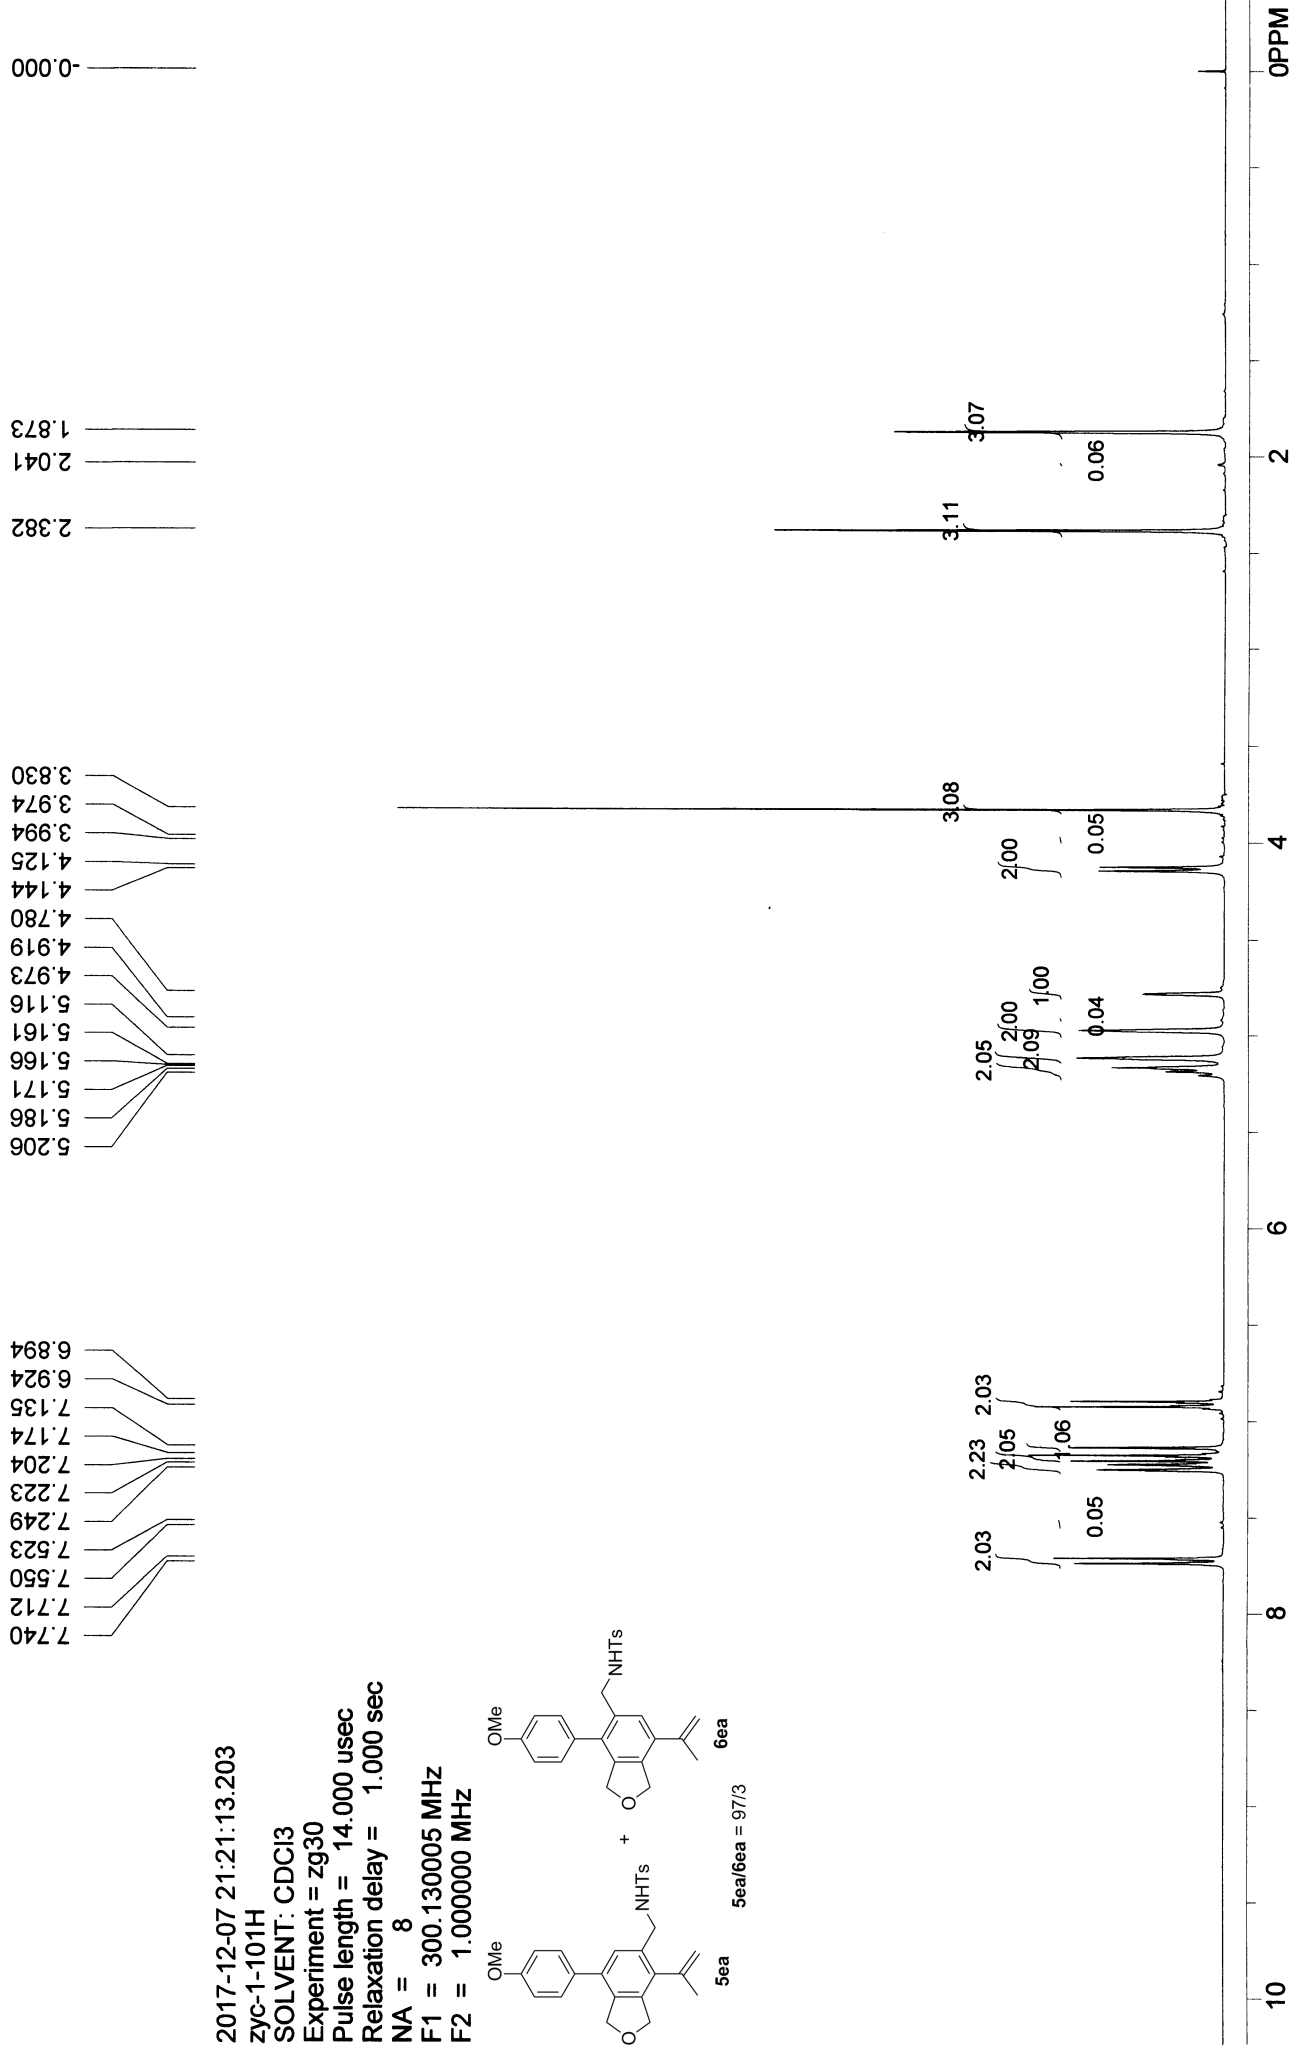

2017-12-11 17:03:28.125

zyc-1-101C

SOLVENT: CDCl<sub>3</sub>

Experiment = zgpg30

Pulse length = 9.500 usec

Relaxation delay = 2.000 sec

NA = 263

F1 = 75.467751 MHz

F2 = 1.000000 MHz

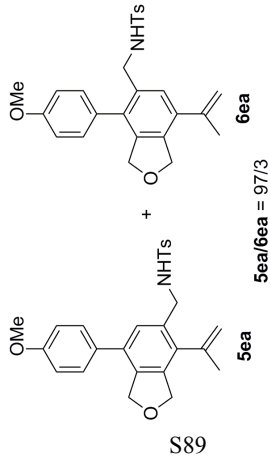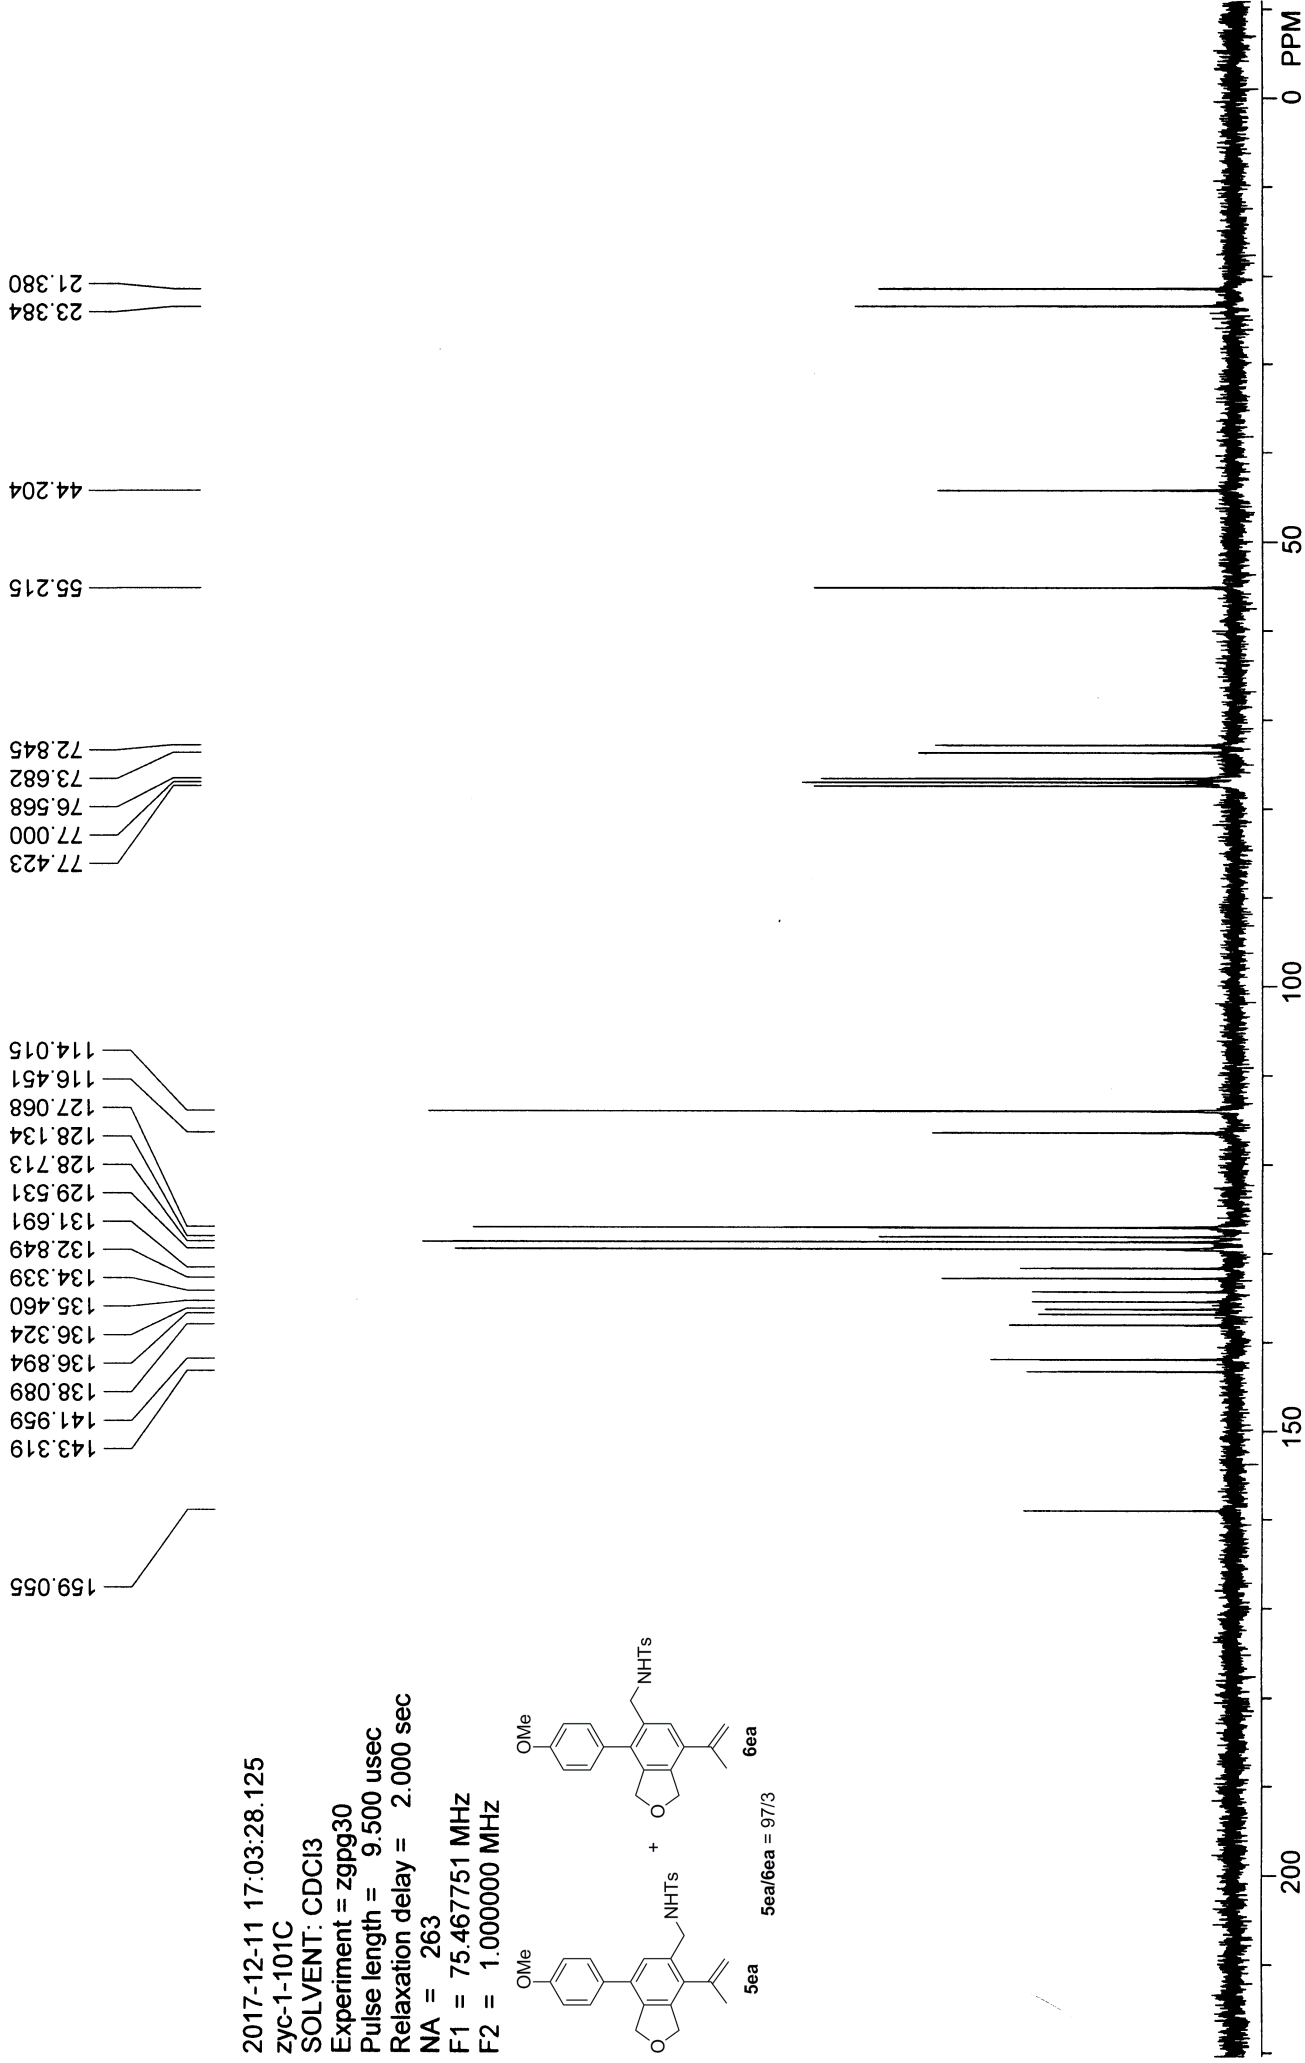

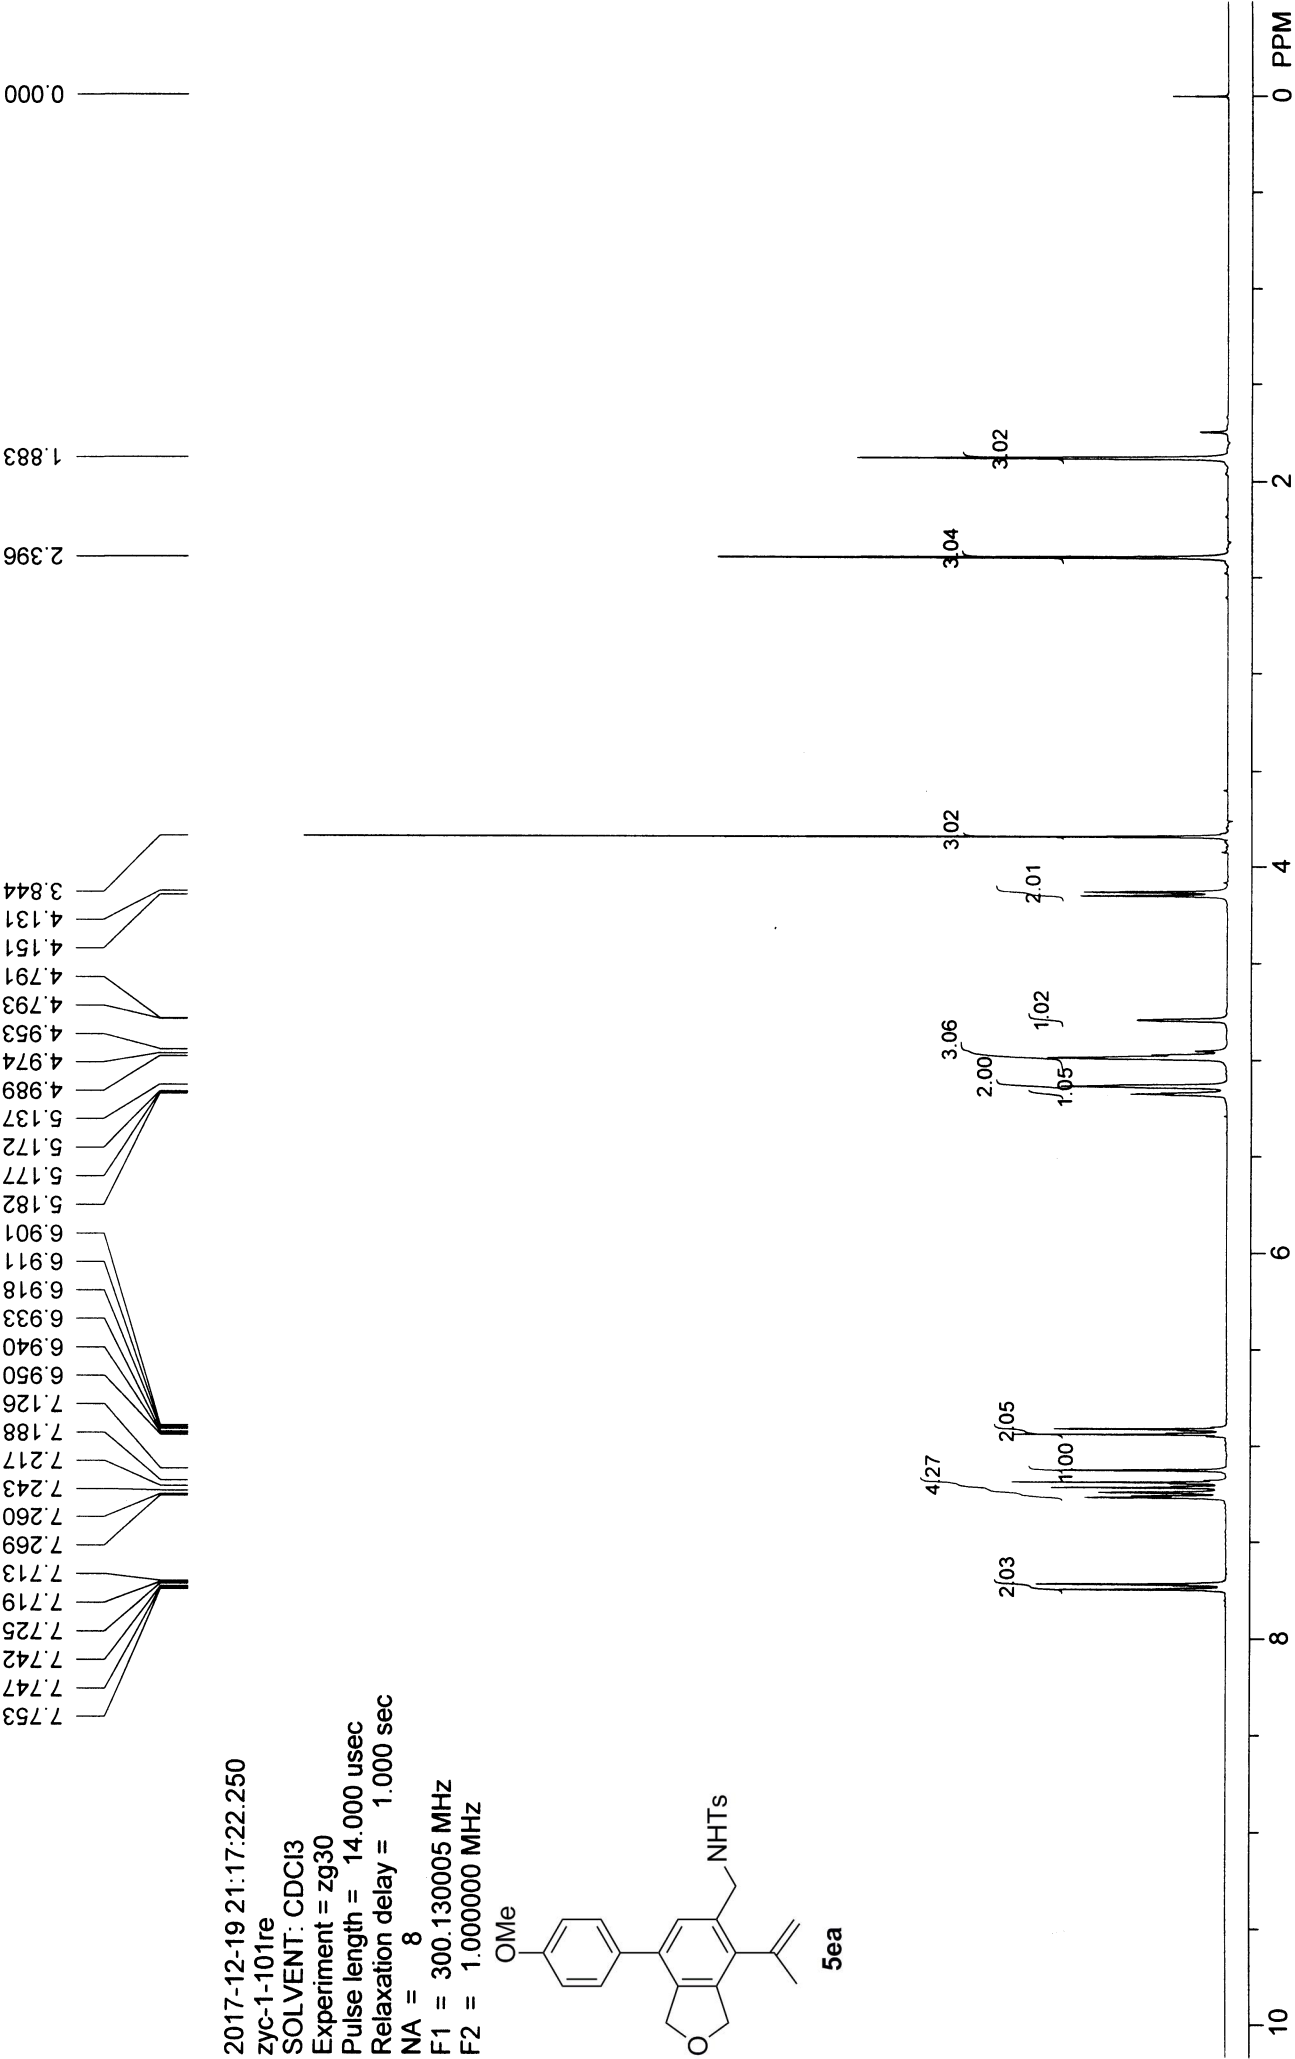

2017-12-19 21:17:22.250  
 zyc-1-101re  
 SOLVENT: CDCl3  
 Experiment = zg30  
 Pulse length = 14.000 usec  
 Relaxation delay = 1.000 sec  
 NA = 8  
 F1 = 300.130005 MHz  
 F2 = 1.000000 MHz

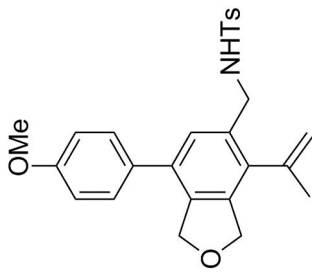

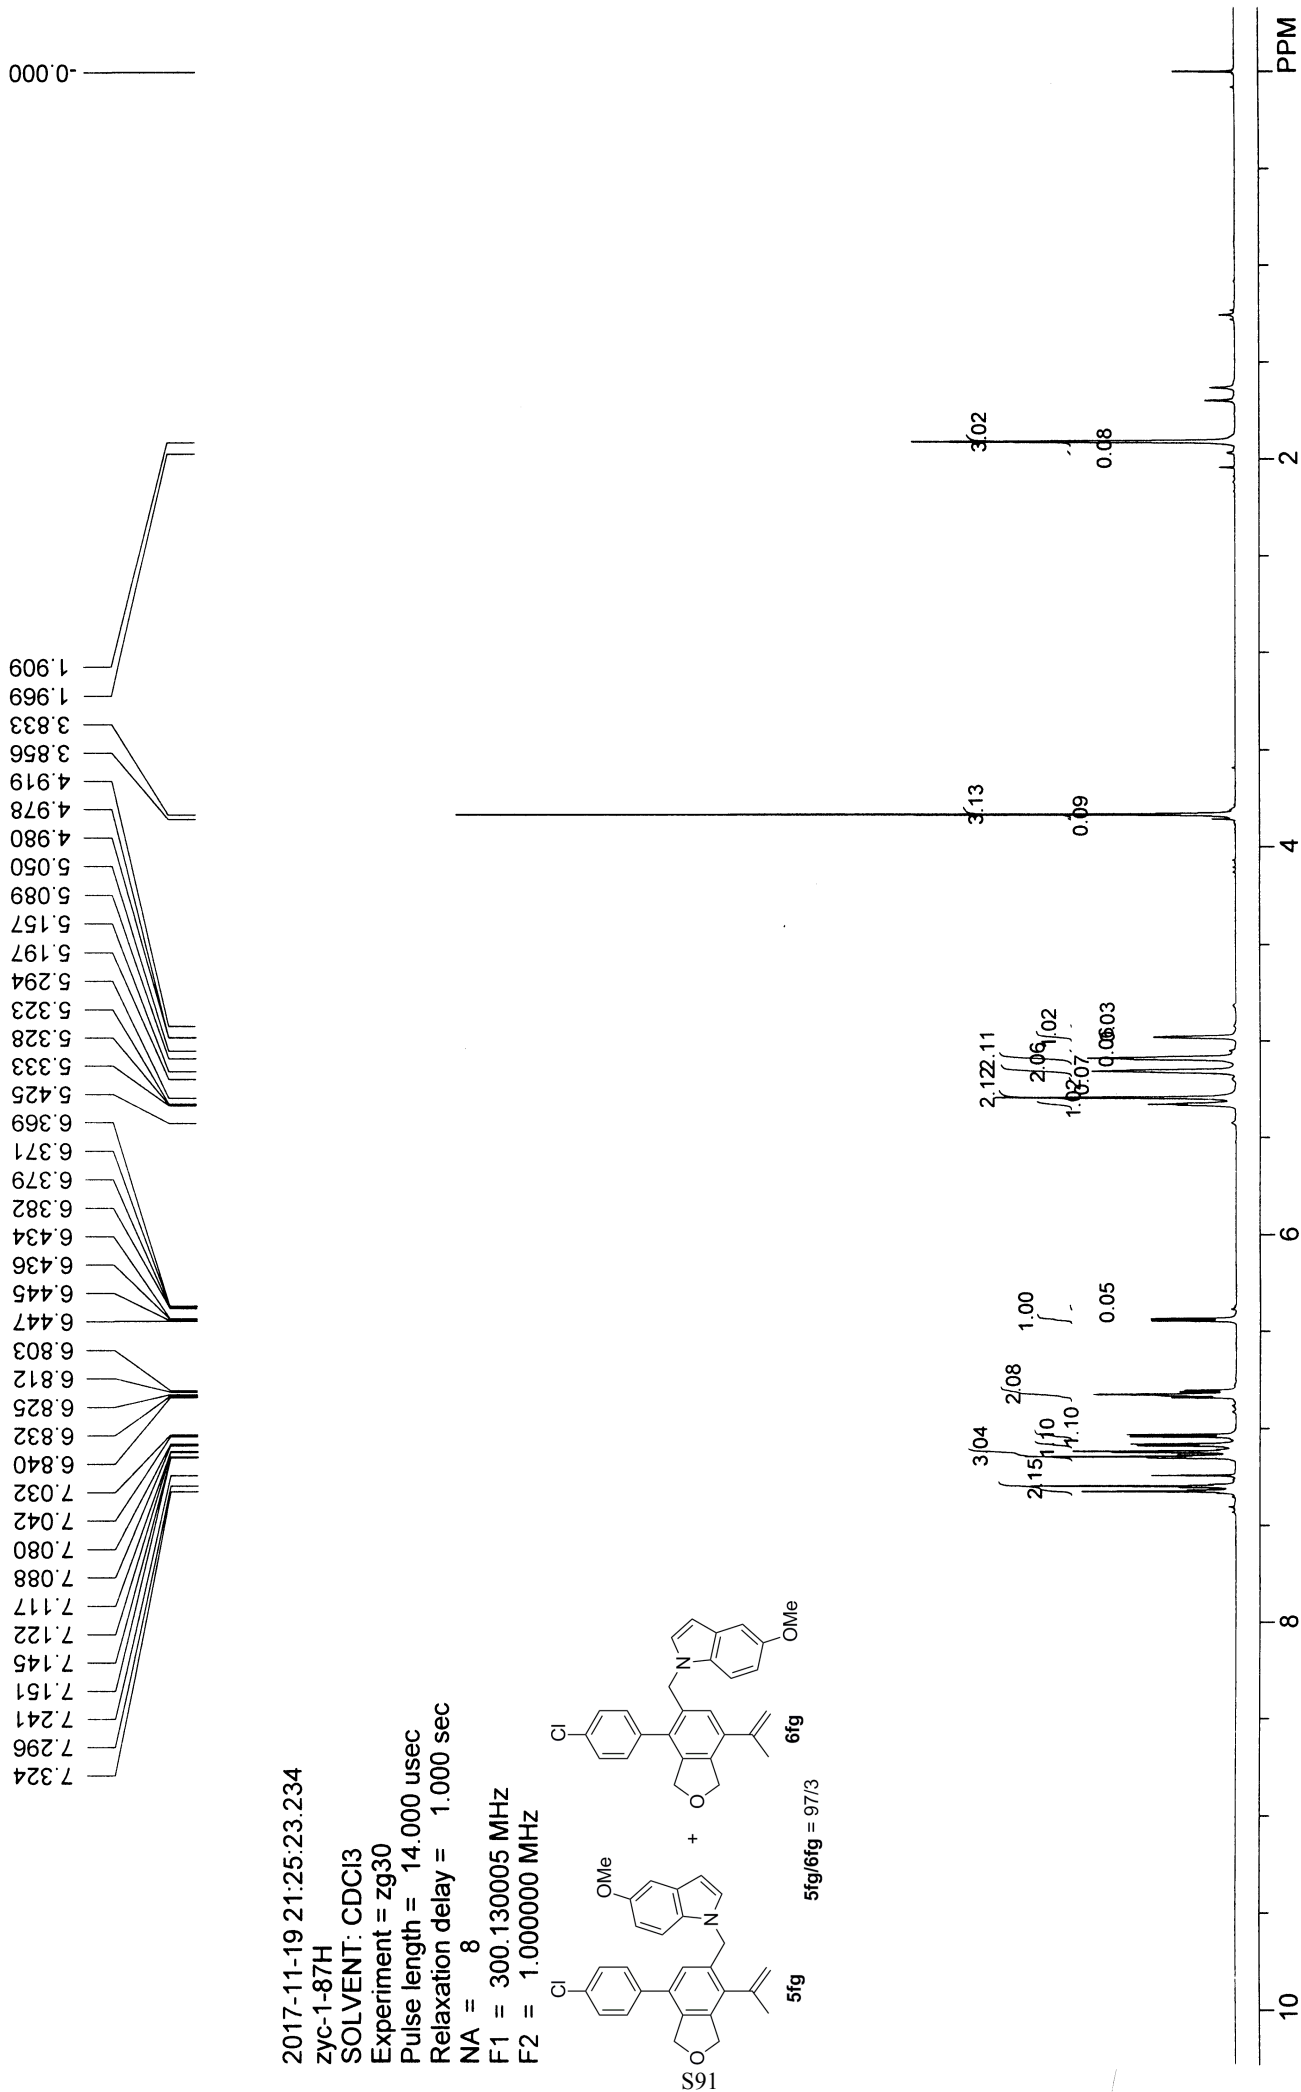

2017-11-19 22:46:27.531

zyc-1-87°C

SOLVENT: CDCl<sub>3</sub>

Experiment = zgpg30

Pulse length = 9.500 usec

Relaxation delay = 2.000 sec

NA = 1329

F1 = 75.467751 MHz

F2 = 1.000000 MHz

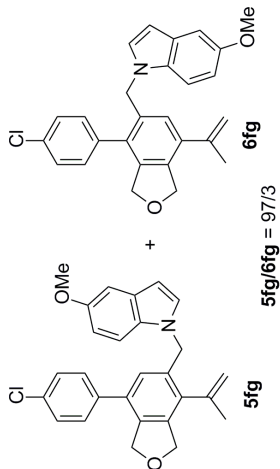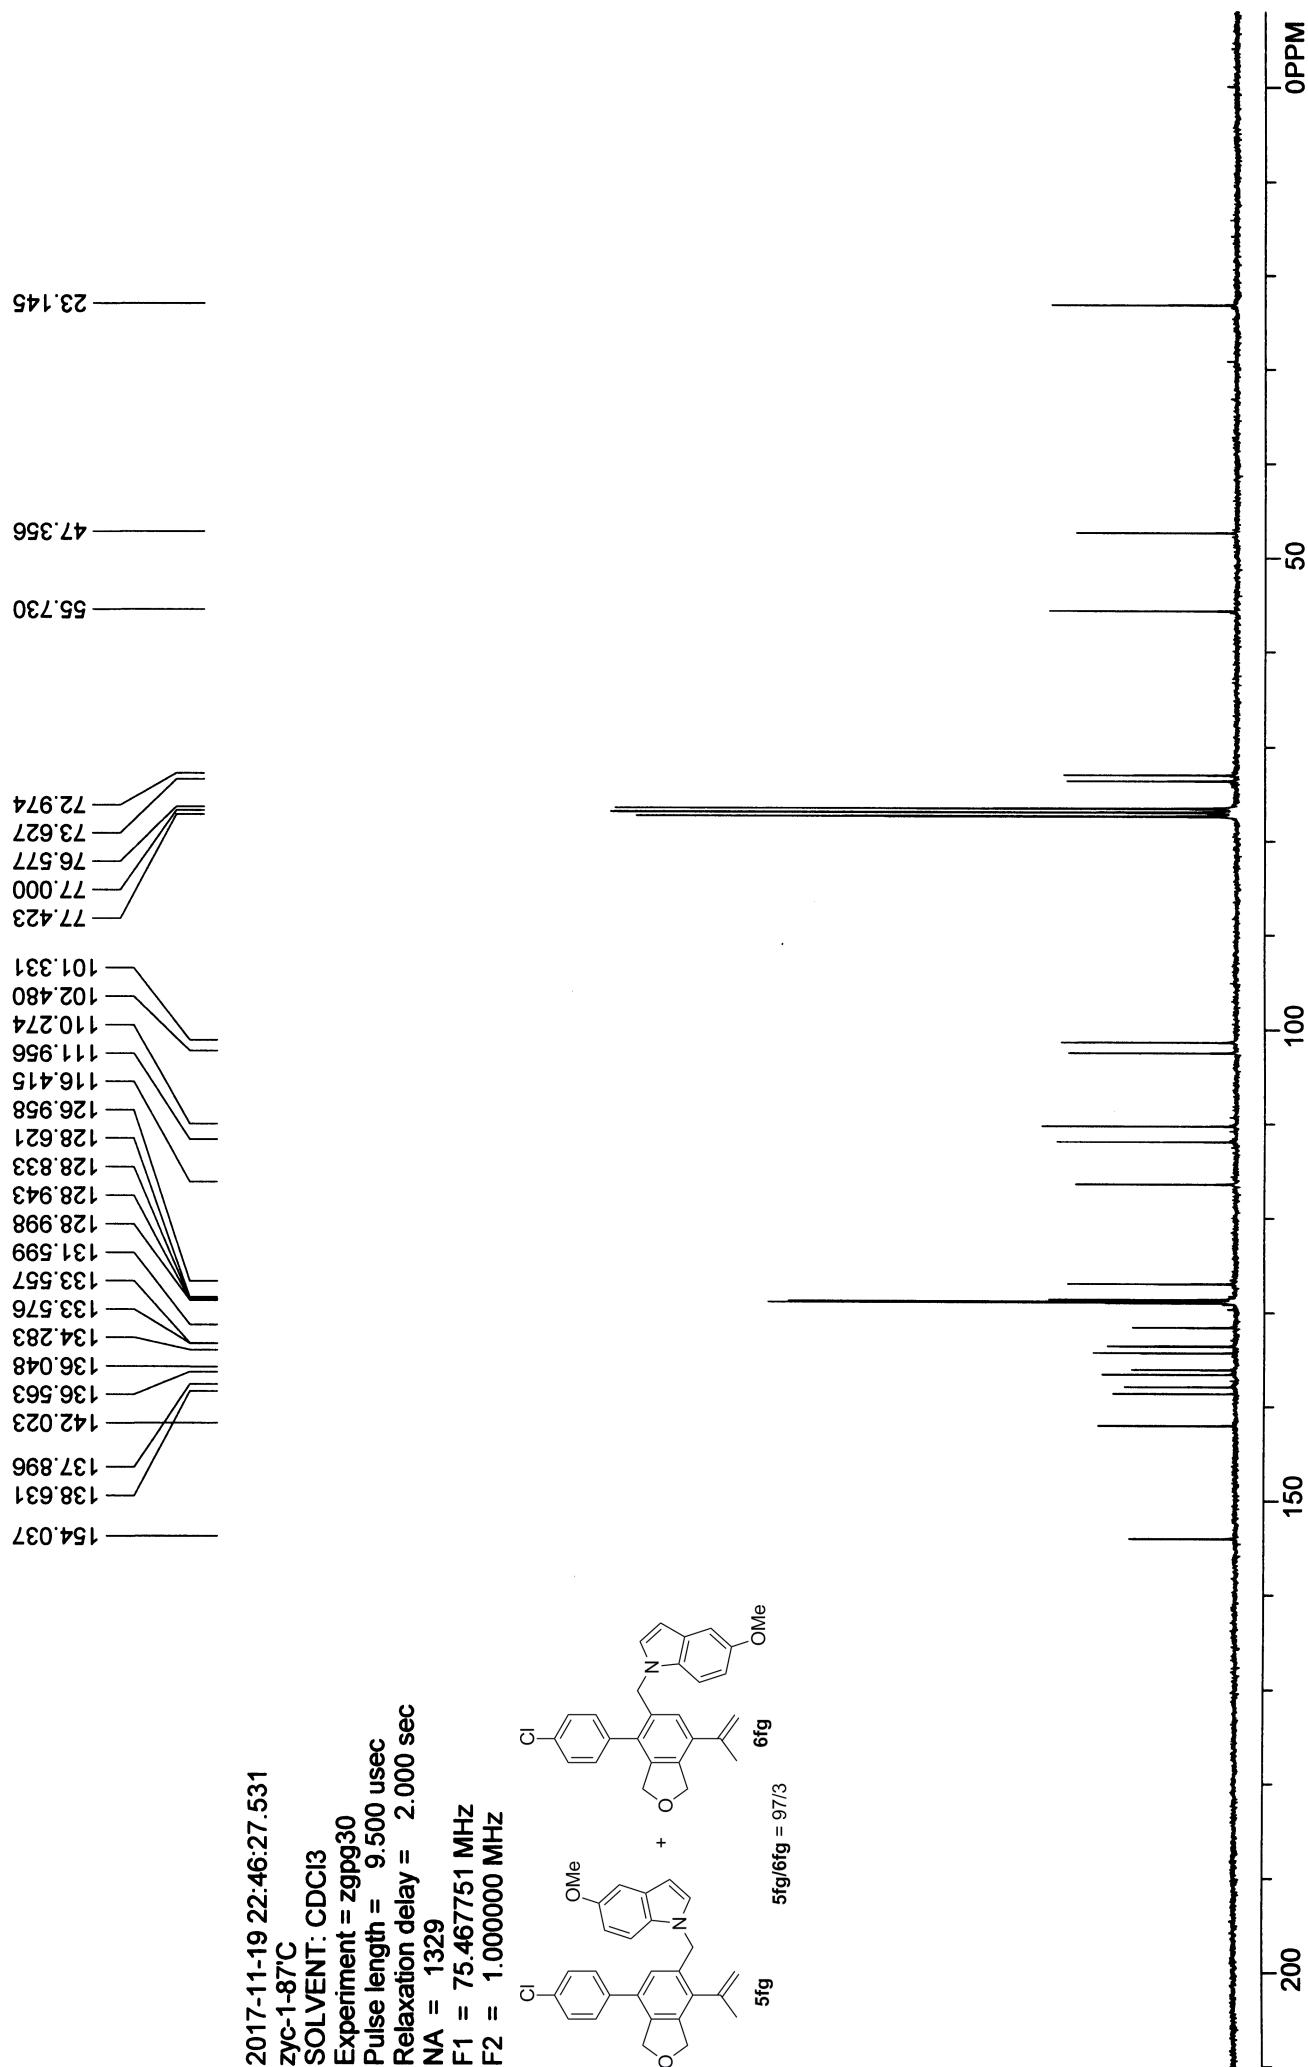



2017-12-17 09:08:09.625

zyc-1-87reH

SOLVENT: CDCl<sub>3</sub>

Experiment = zg30

Pulse length = 14.000 usec

Relaxation delay = 1.000 sec

NA = 8

F1 = 300.130005 MHz

F2 = 1.000000 MHz

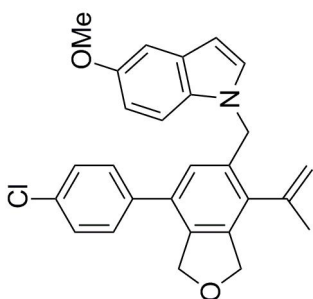

5fg

S93

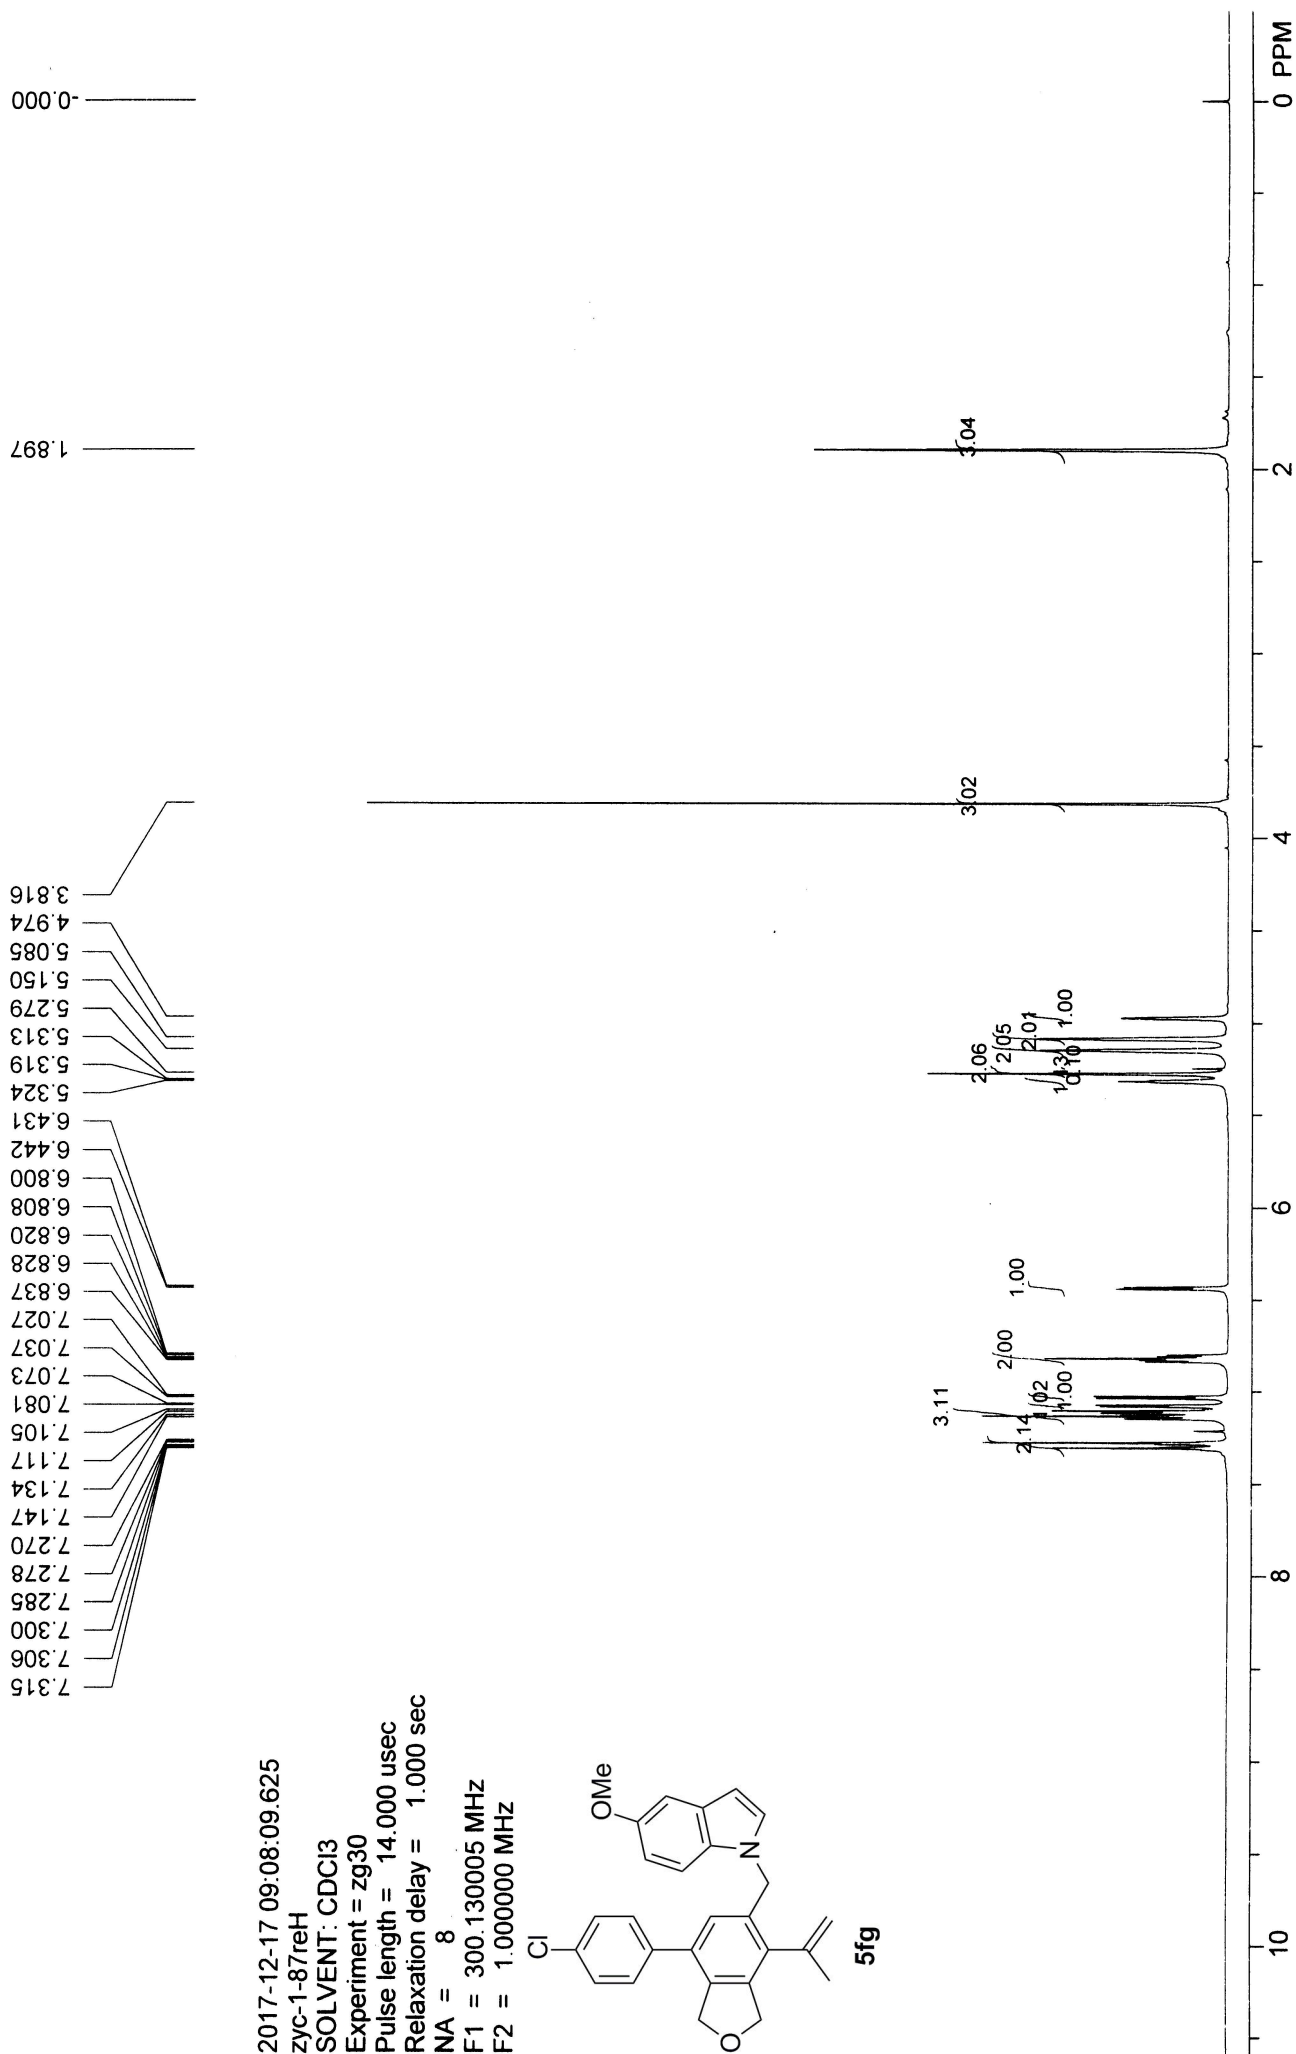

2018-01-30 21:59:35.921

zyc-1-131re

SOLVENT: CDCl<sub>3</sub>

Experiment = zg30

Pulse length = 14.000 usec

Relaxation delay = 1.000 sec

NA = 8

F1 = 300.130005 MHz

F2 = 1.000000 MHz

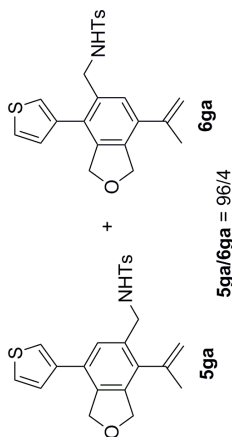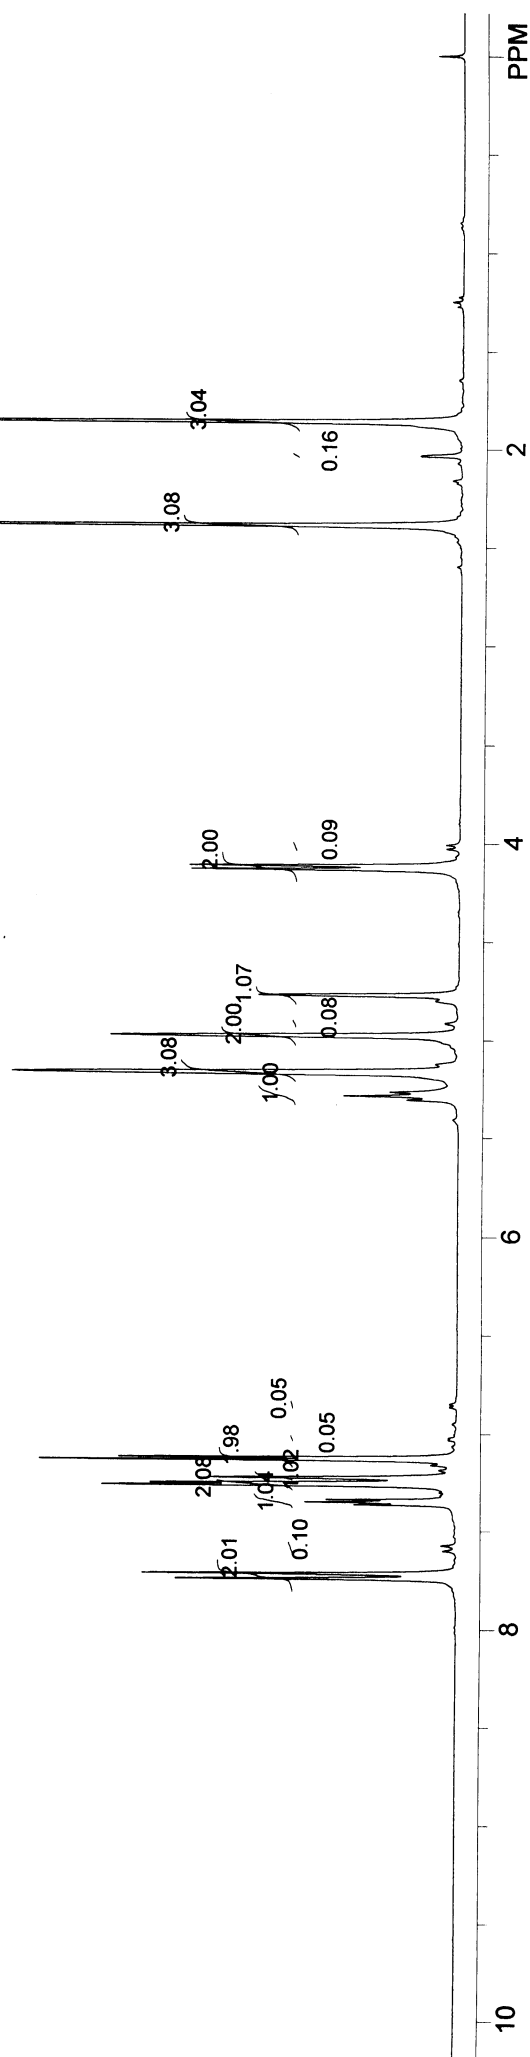

2018-01-31 09:03:21.640

zyc-1-131re

SOLVENT: CDCl<sub>3</sub>

Experiment = zgpg30

Pulse length = 9.500 usec

Relaxation delay = 2.000 sec

NA = 417

F1 = 75.467751 MHz

F2 = 1.000000 MHz

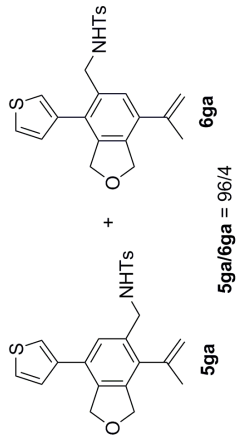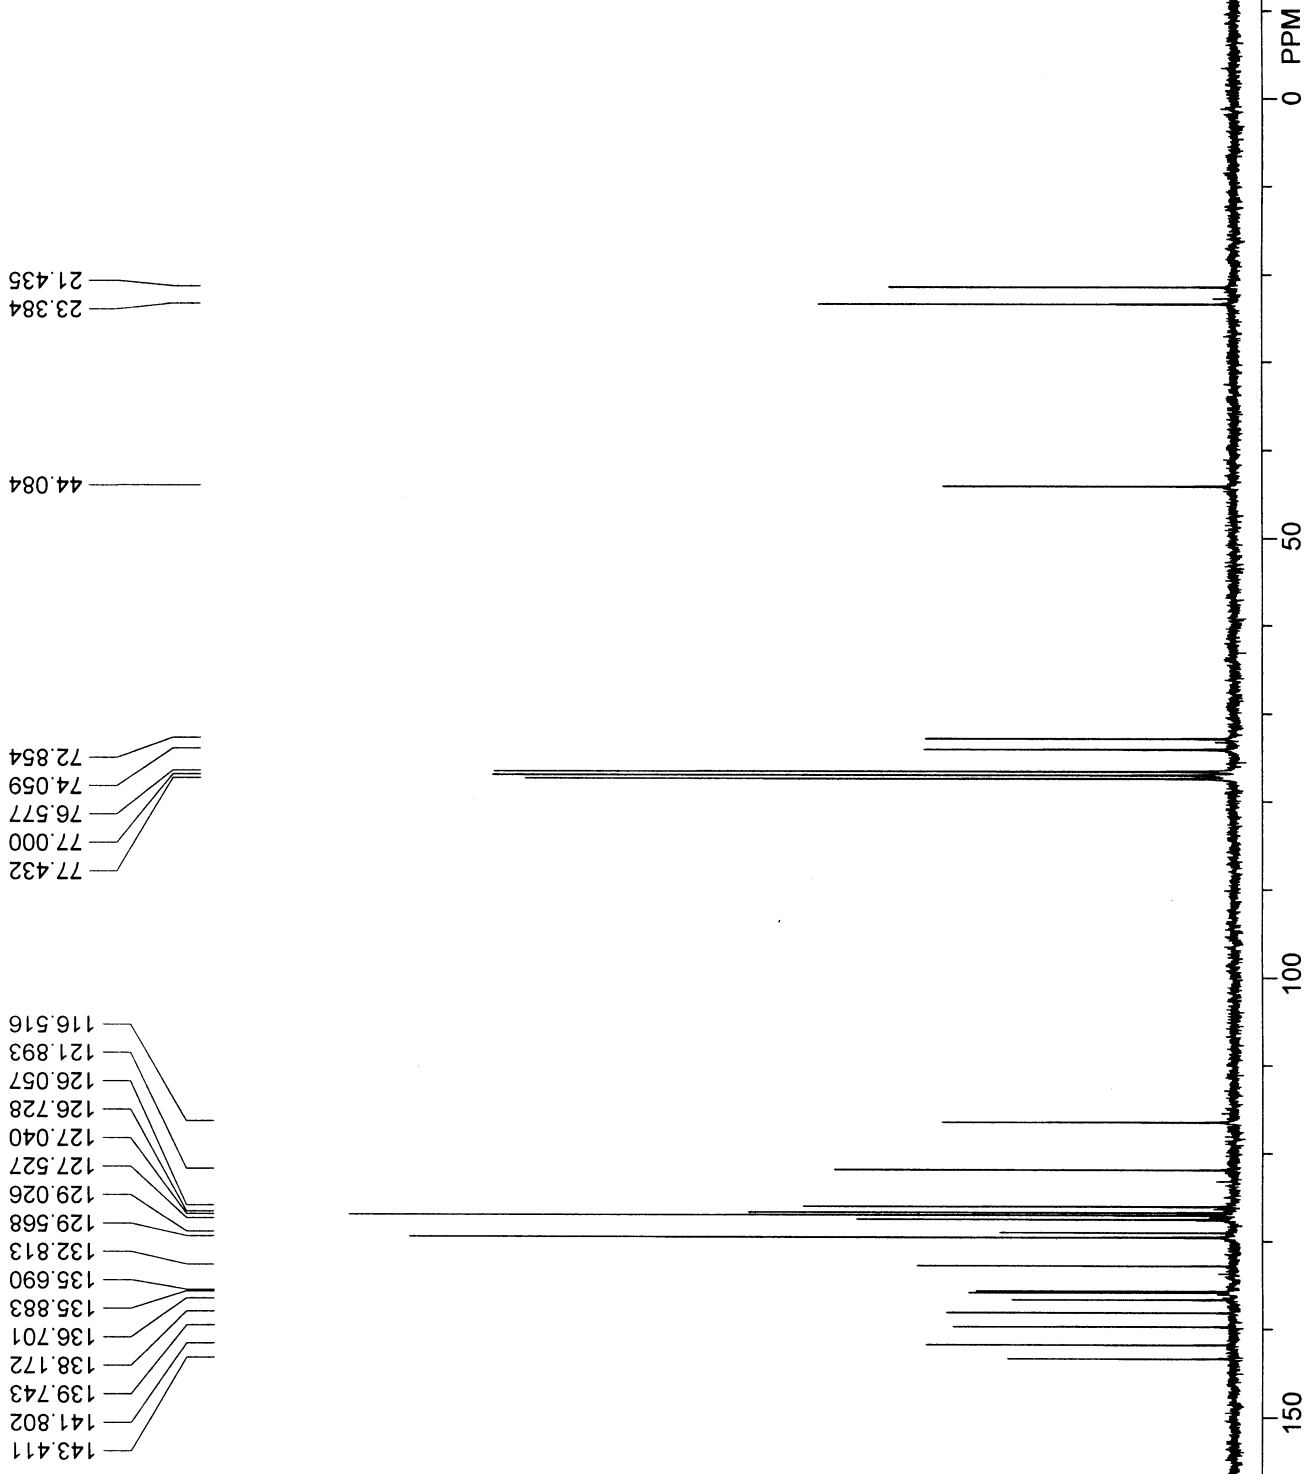

2018-11-23 09:59:27.687

zyc-3-32

SOLVENT: CDCl<sub>3</sub>

Experiment = zg30

Pulse length = 14.000 usec

Relaxation delay = 1.000 sec

NA = 8

F1 = 300.130005 MHz

F2 = 1.000000 MHz

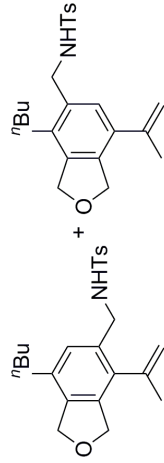

968

5ka 6ka  
5ka/6ka = 96/4

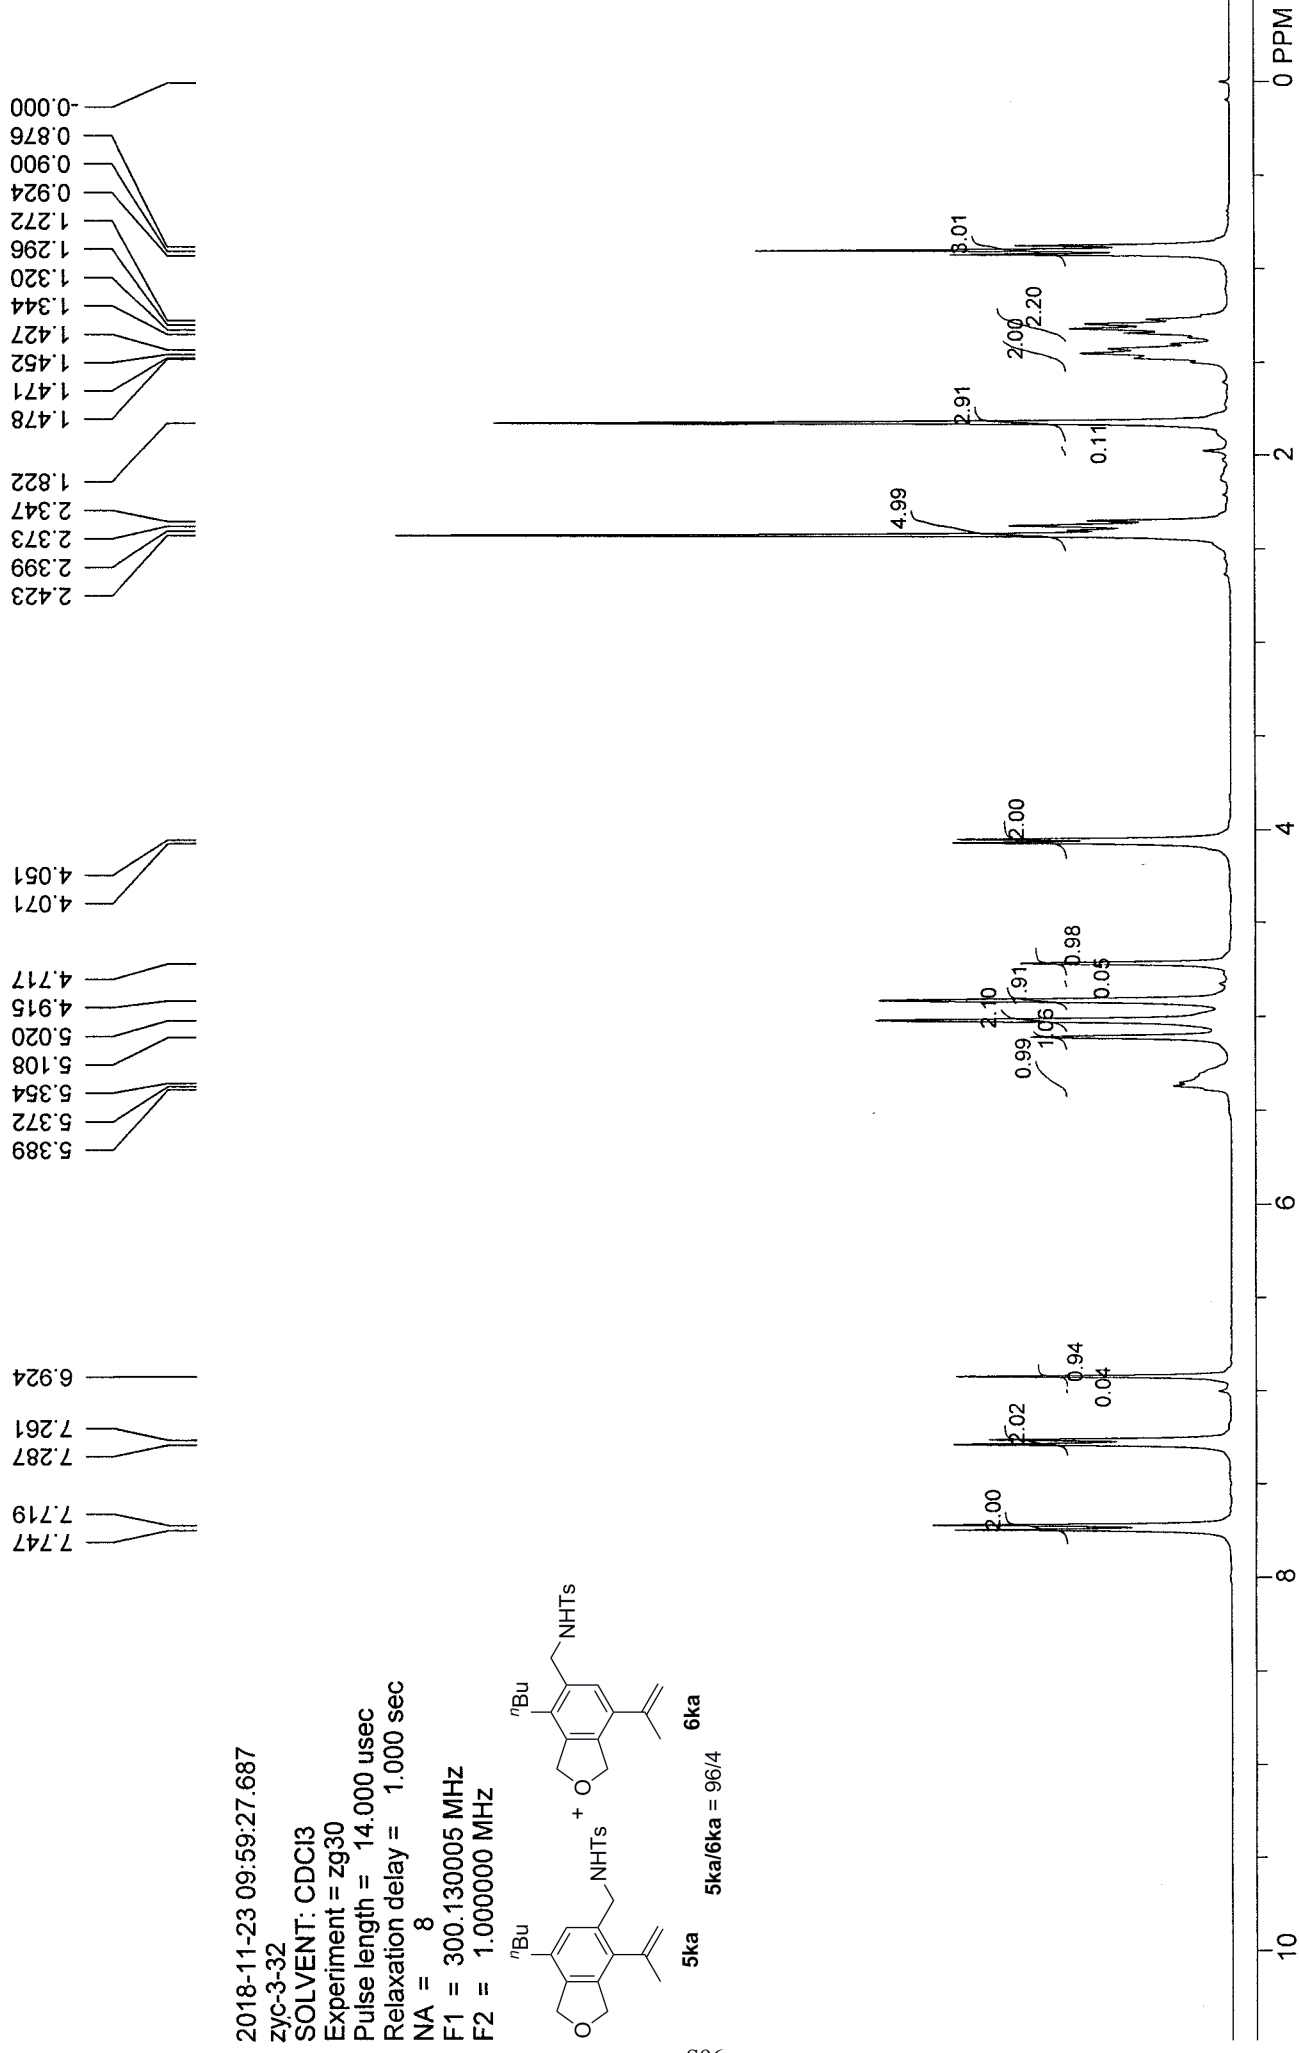

2018-11-23 10:21:56.359

zyc-3-32

SOLVENT: CDCl<sub>3</sub>

Experiment = zgpg30

Pulse length = 9.500 usec

Relaxation delay = 2.000 sec

NA = 360

F1 = 75.467751 MHz

F2 = 1.000000 MHz

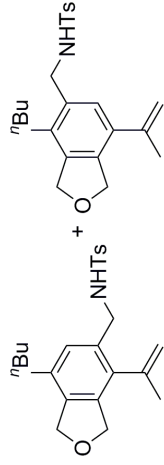

598

5ka 5ka/6ka = 96/4

6ka

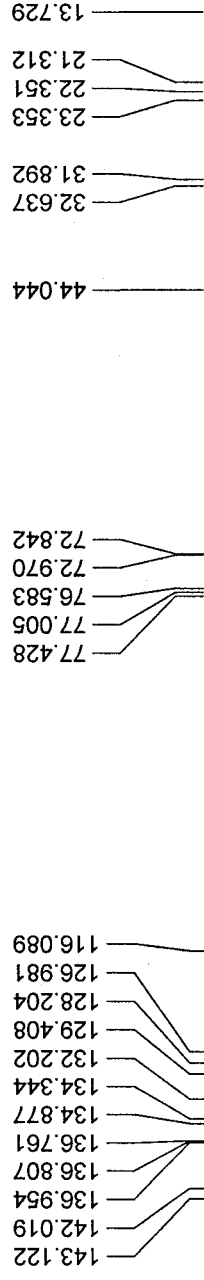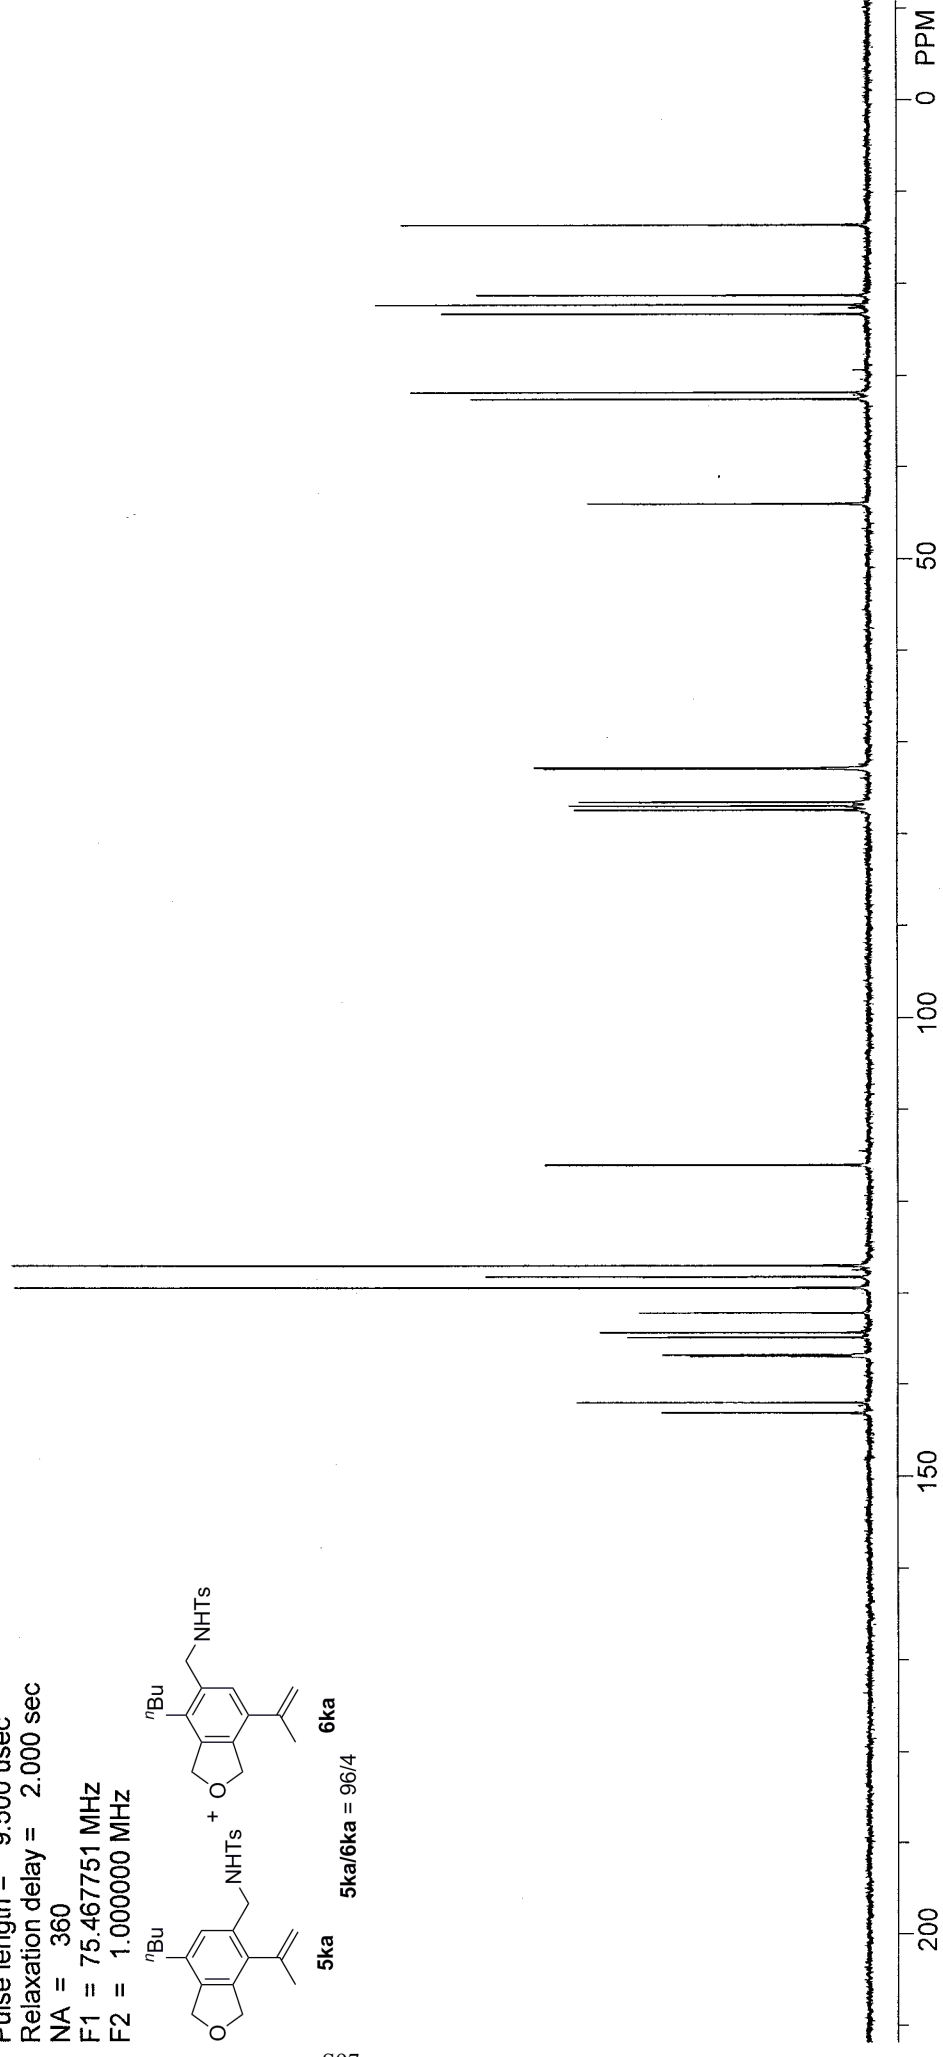

2018-11-23 10:26:46.875

zyc-3-33H

SOLVENT: CDCl<sub>3</sub>

Experiment = zg30

Pulse length = 14.000 usec

Relaxation delay = 1.000 sec

NA = 8

F1 = 300.130005 MHz

F2 = 1.000000 MHz

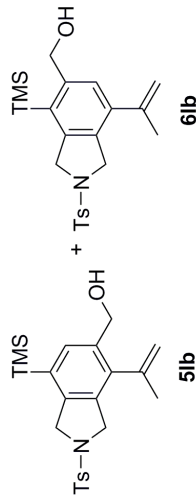

865

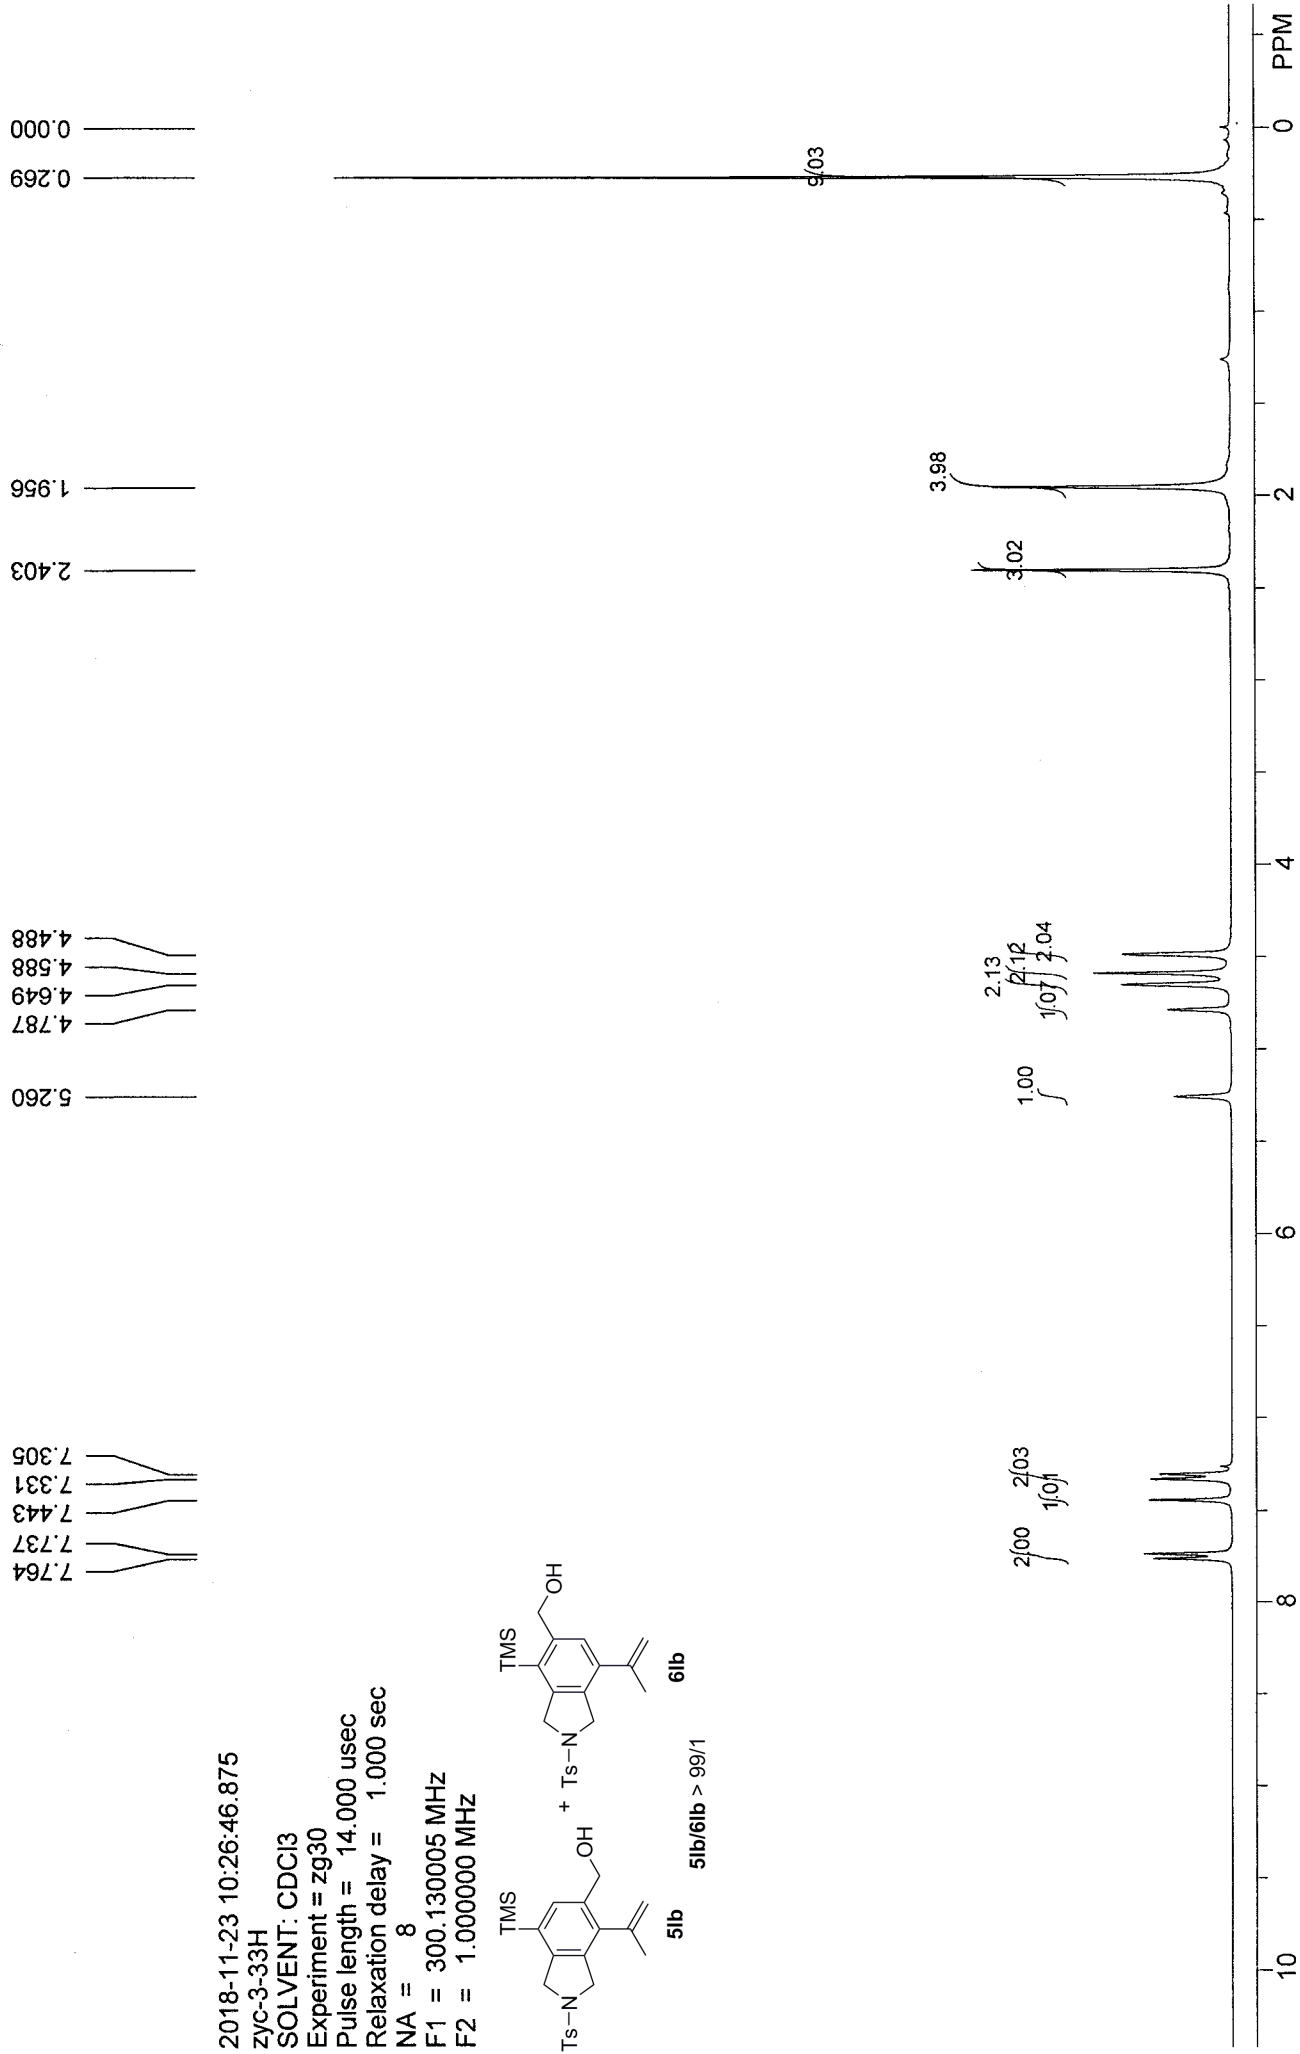

2018-11-23 10:40:48.890

zyc-3-33

SOLVENT: CDCl<sub>3</sub>

Experiment = zgpg30

Pulse length = 9.500 usec

Relaxation delay = 2.000 sec

NA = 221

F1 = 75.467751 MHz

F2 = 1.000000 MHz

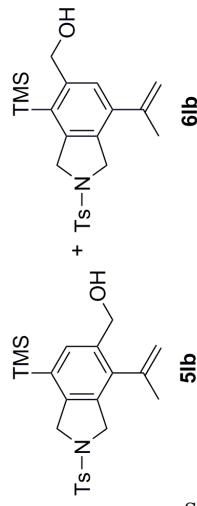

698

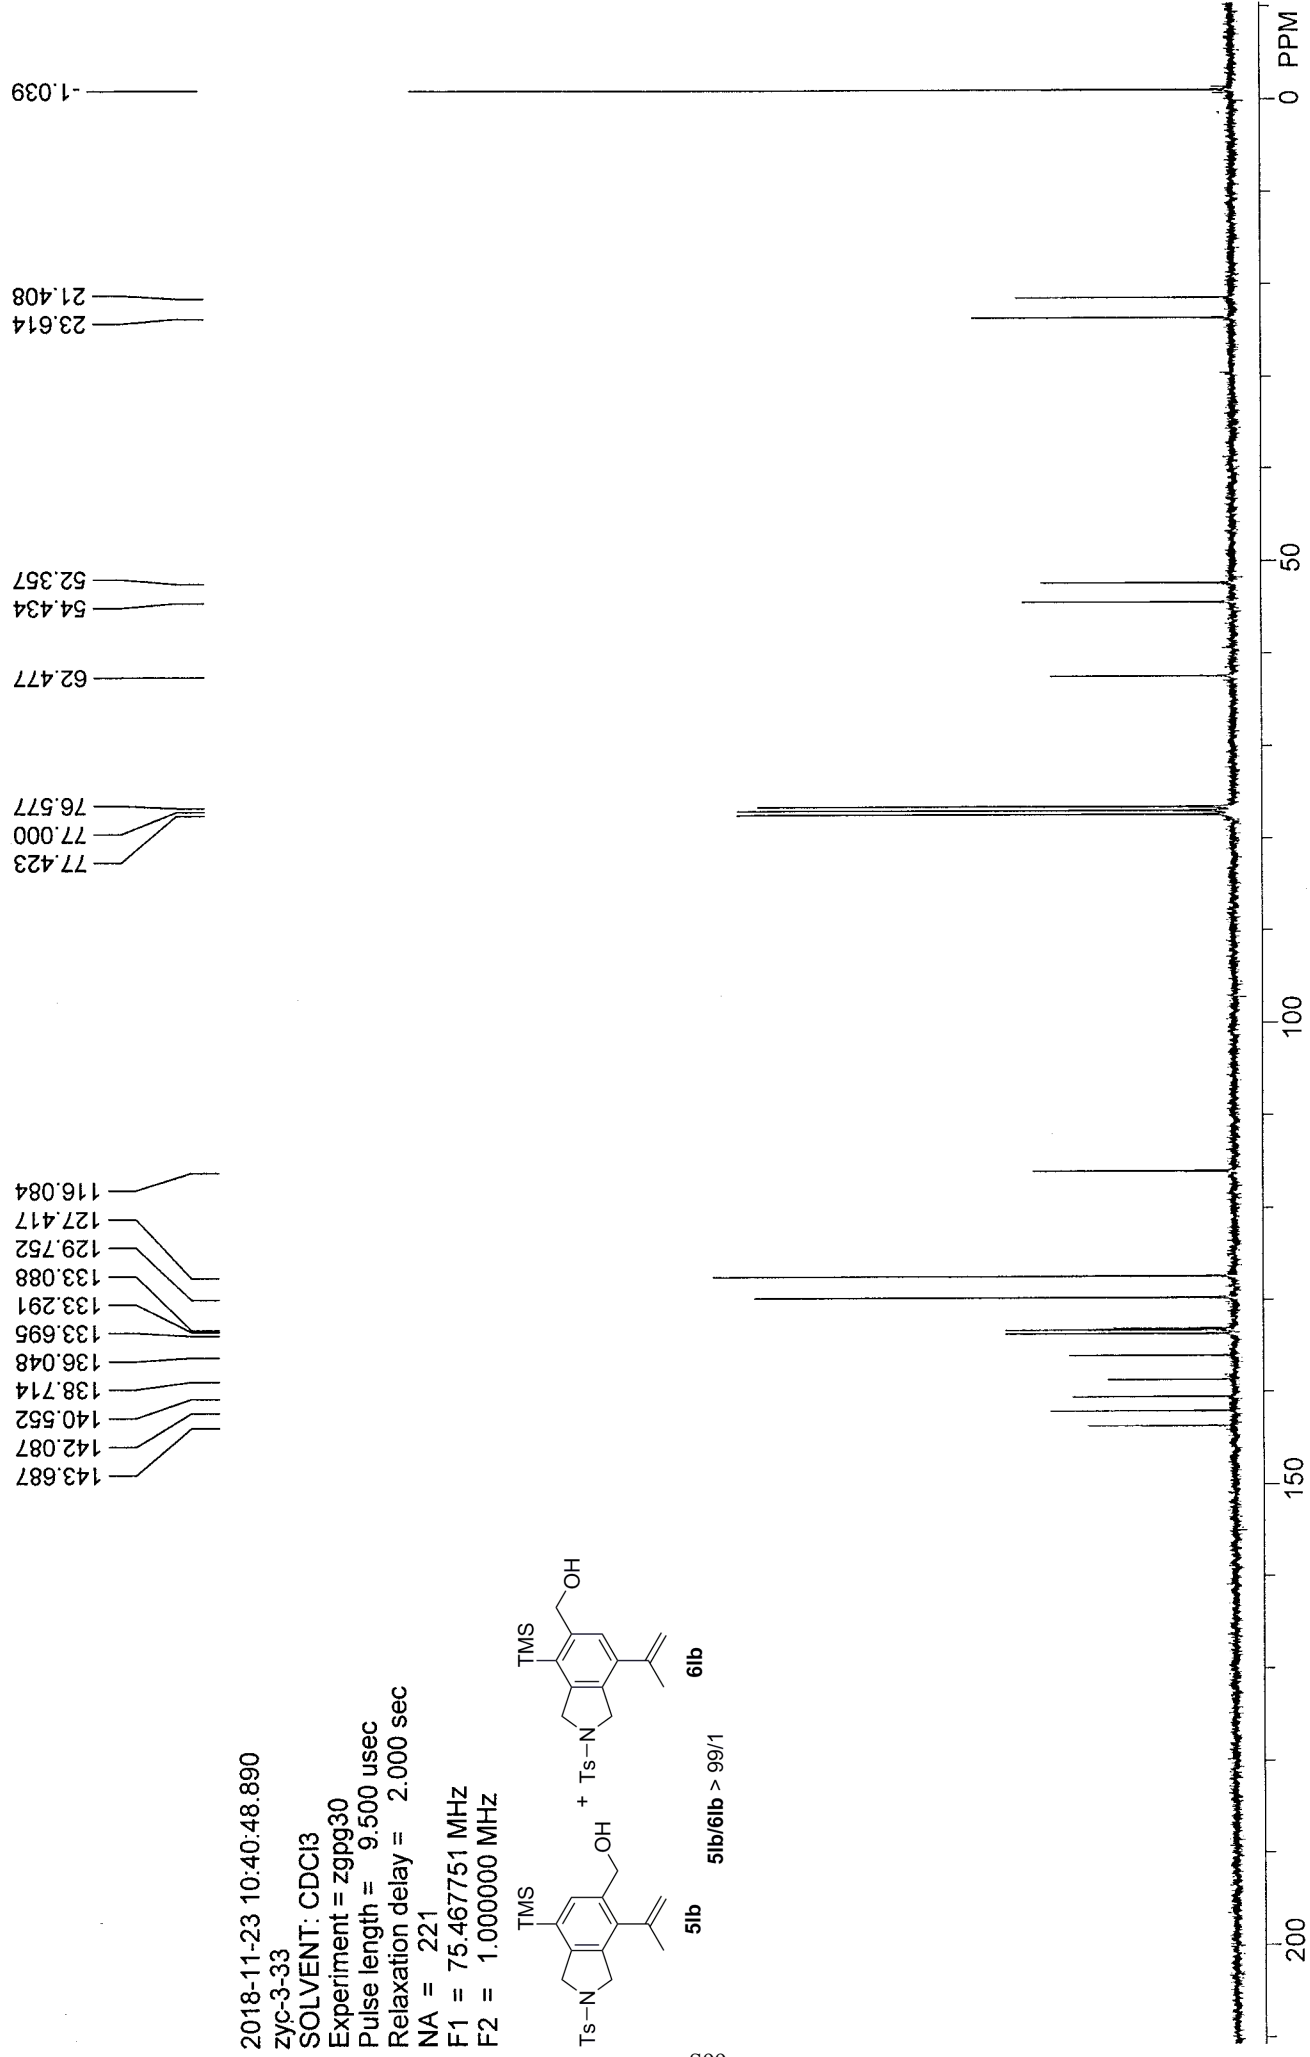

2017-10-22 13:44:42.125

zyc-1-71H

SOLVENT: CDCl<sub>3</sub>

Experiment = zg30

Pulse length = 14.000 usec

Relaxation delay = 1.000 sec

NA = 8

F1 = 300.130005 MHz

F2 = 1.000000 MHz

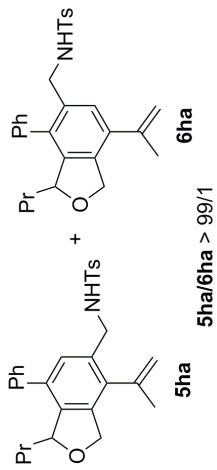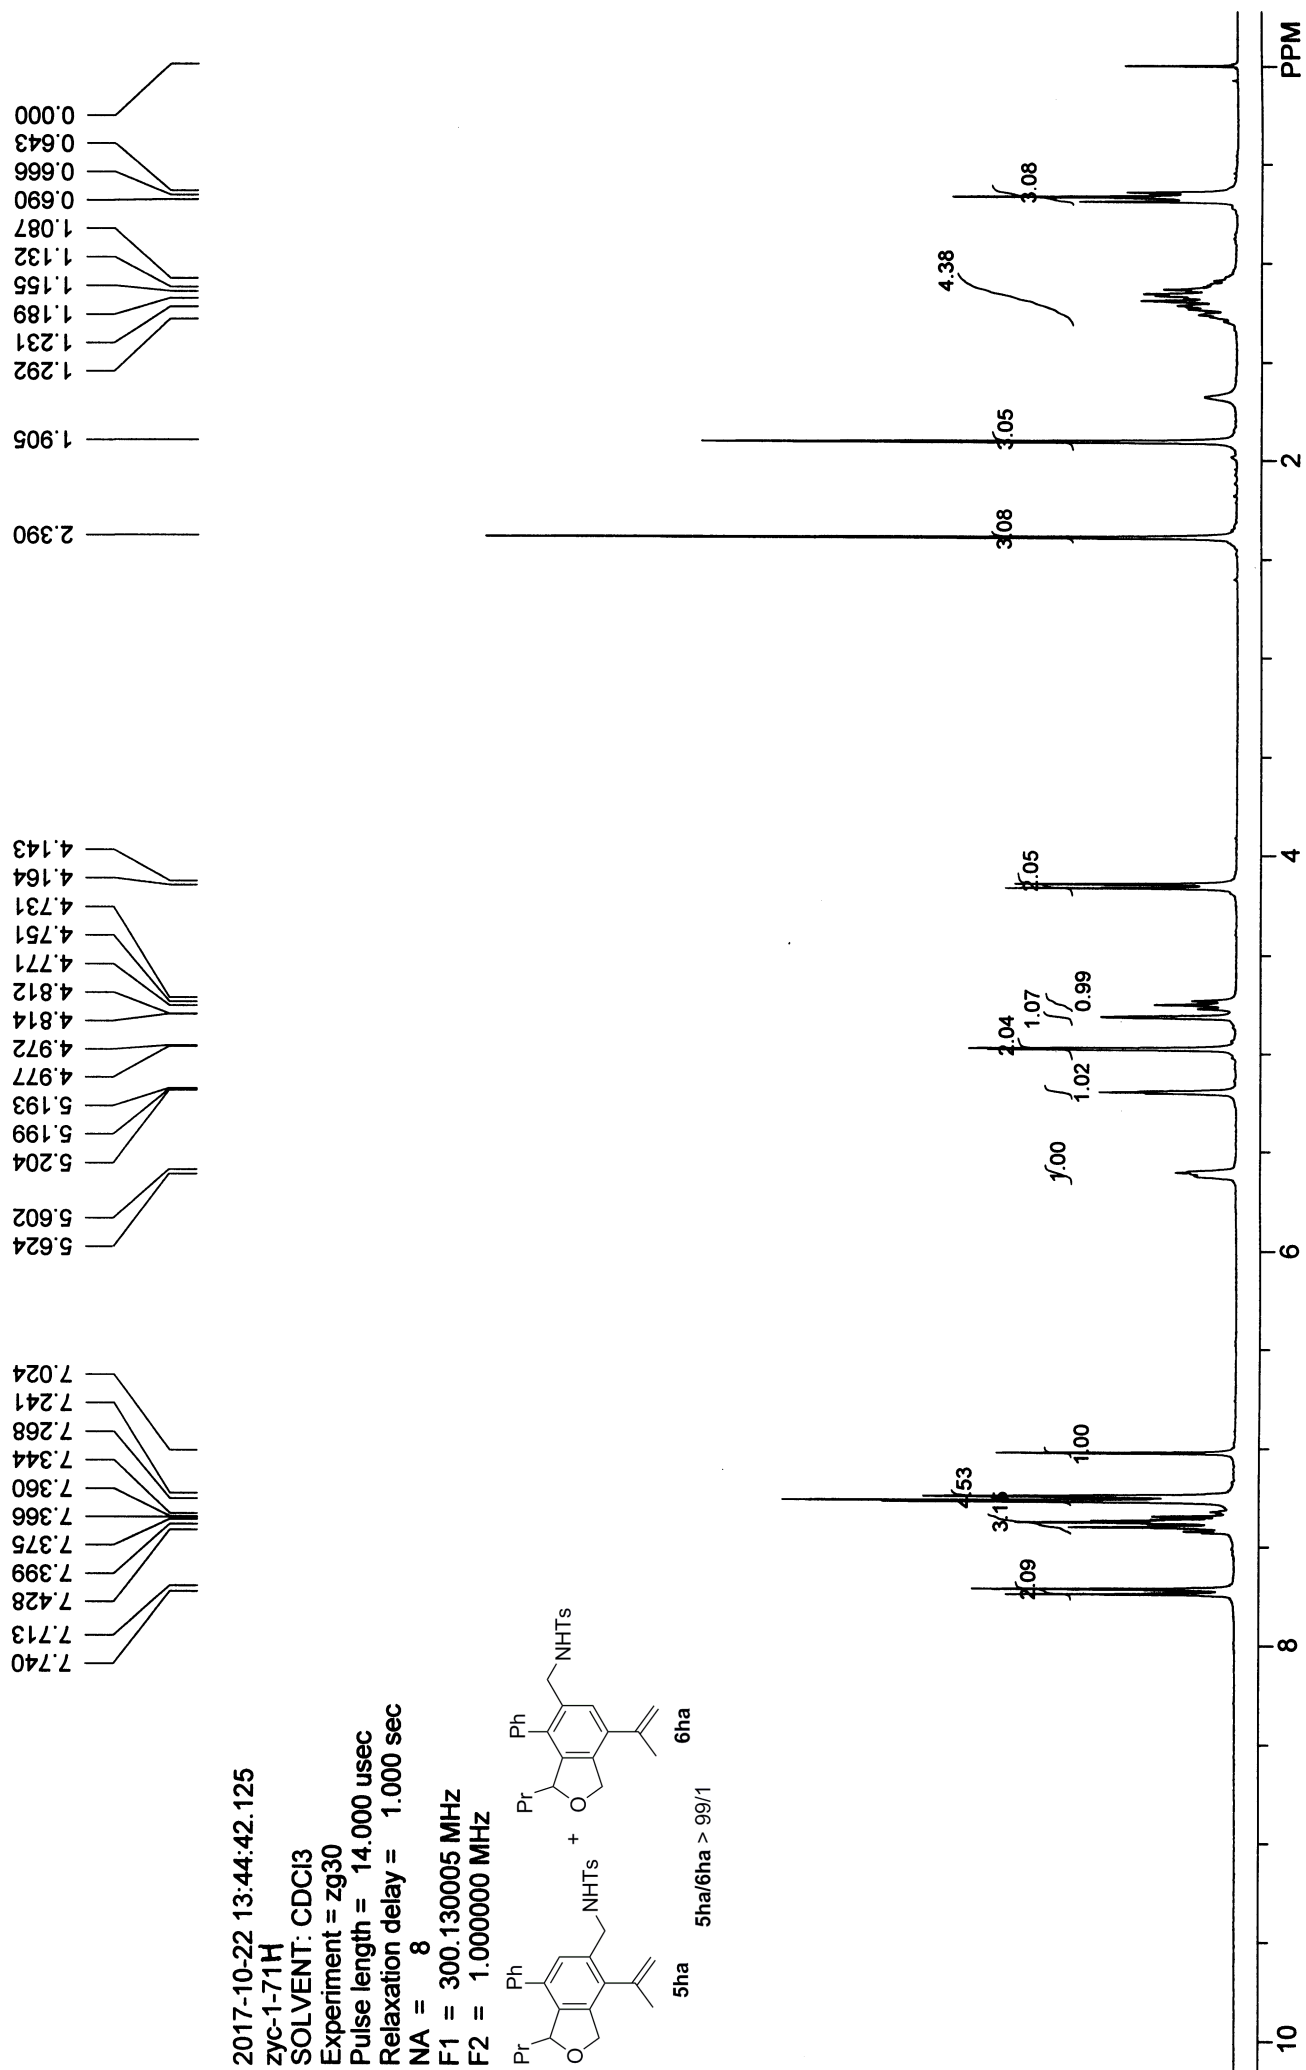



2017-10-22 17:19:02.953

zyc-1-71C

SOLVENT: CDCl<sub>3</sub>

Experiment = zgpg30

Pulse length = 9.500 usec

Relaxation delay = 2.000 sec

NA = 454

F1 = 75.467751 MHz

F2 = 1.000000 MHz

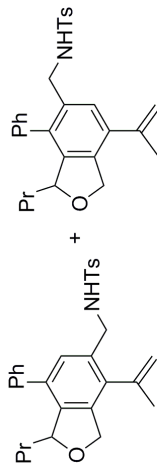

S101

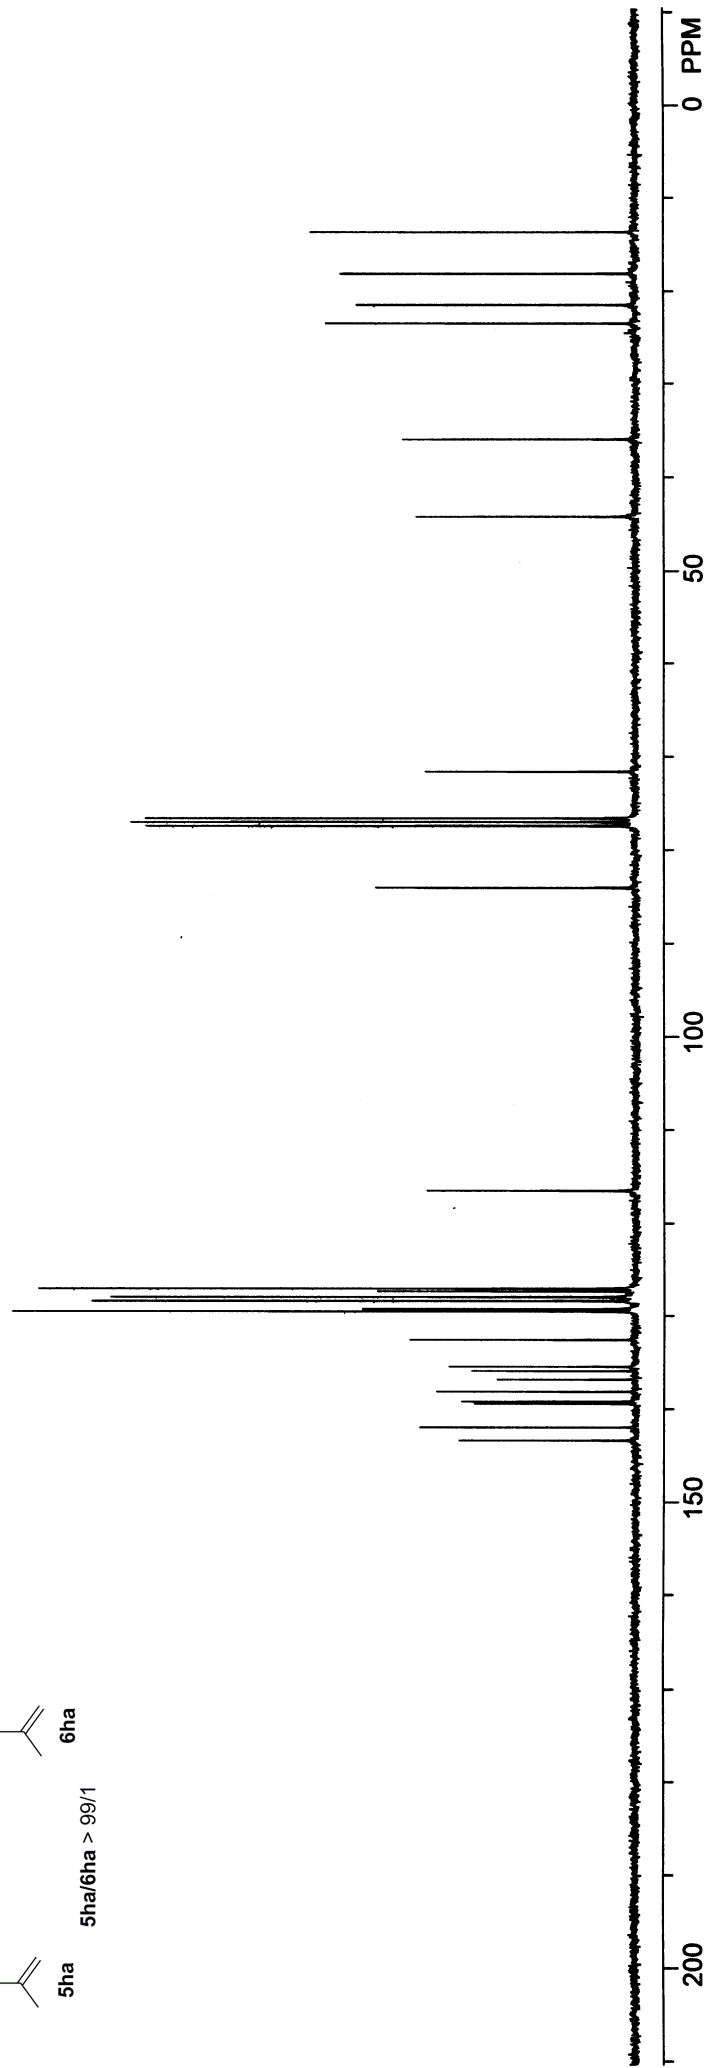

13.632  
18.071  
21.408  
23.393

35.949  
44.158

71.586  
76.577  
77.000  
77.423  
84.023

116.479  
127.059  
127.371  
127.987  
128.410  
129.274  
129.540  
132.592  
135.442  
135.929  
136.848  
138.162  
139.210  
139.449  
141.913  
143.337

-0.000

1.746  
1.867  
2.383  
2.402

3.879  
3.900  
4.072  
4.092  
4.225  
4.492  
4.605  
4.678  
4.698  
4.716  
4.760  
5.211  
5.216  
5.221  
7.078  
7.194  
7.198  
7.219  
7.226  
7.234  
7.262  
7.292  
7.319  
7.380  
7.385  
7.391  
7.415  
7.690  
7.696  
7.703  
7.711  
7.718  
7.725  
7.731

2015-09-04 19:49:10.015

wwt-2-31

SOLVENT: CDCl3

Experiment = zg30

Pulse length = 14.000 usec

Relaxation delay = 1.000 sec

NA = 8

F1 = 300.130005 MHz

F2 = 1.000000 MHz

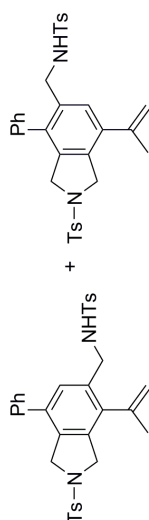

5ia 5ia/6ia = 98/2

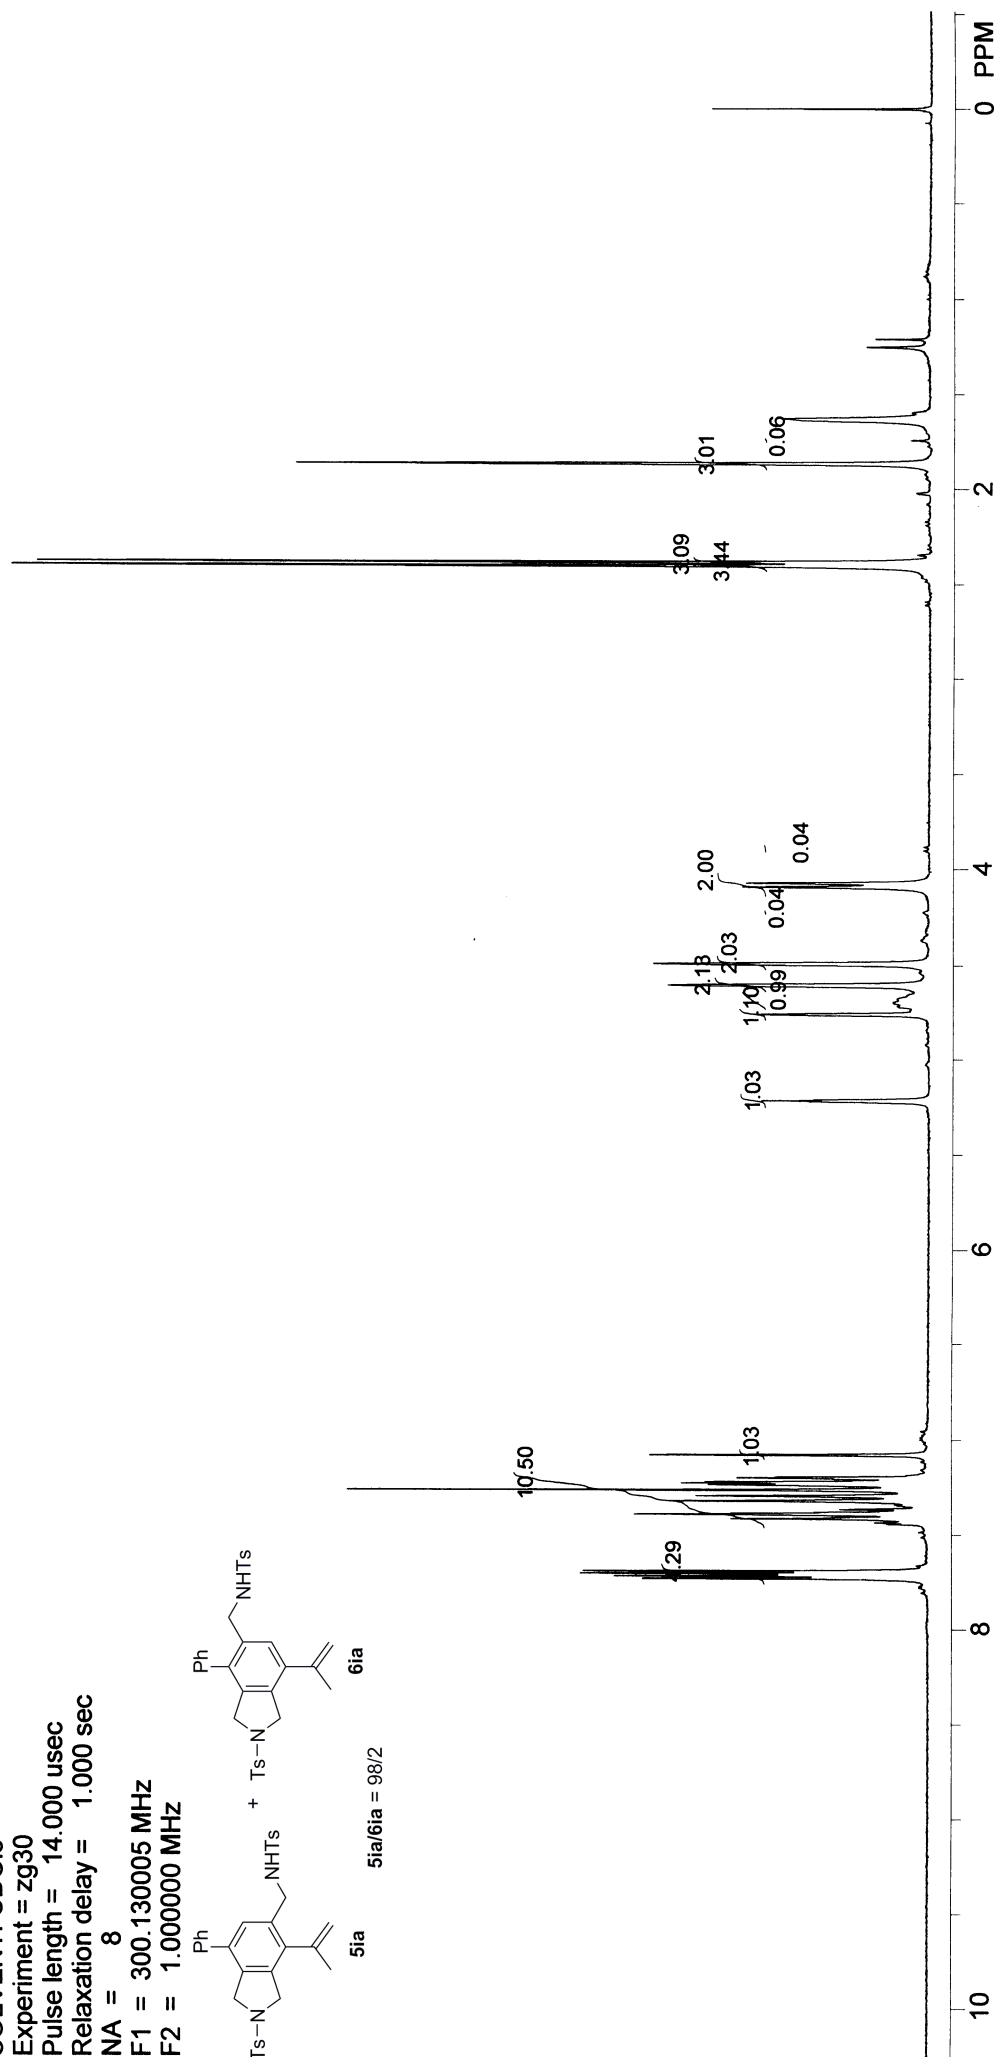

2015-09-03 15:00:16.937

wvt-2-31C

SOLVENT: CDCl<sub>3</sub>

Experiment = zgpg30

Pulse length = 9.500 usec

Relaxation delay = 2.000 sec

NA = 196

F1 = 75.467751 MHz

F2 = 1.000000 MHz

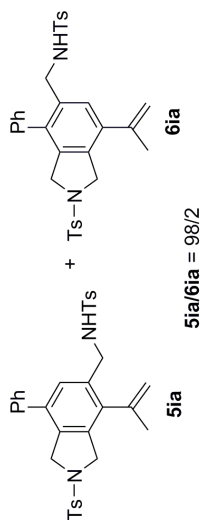

S103

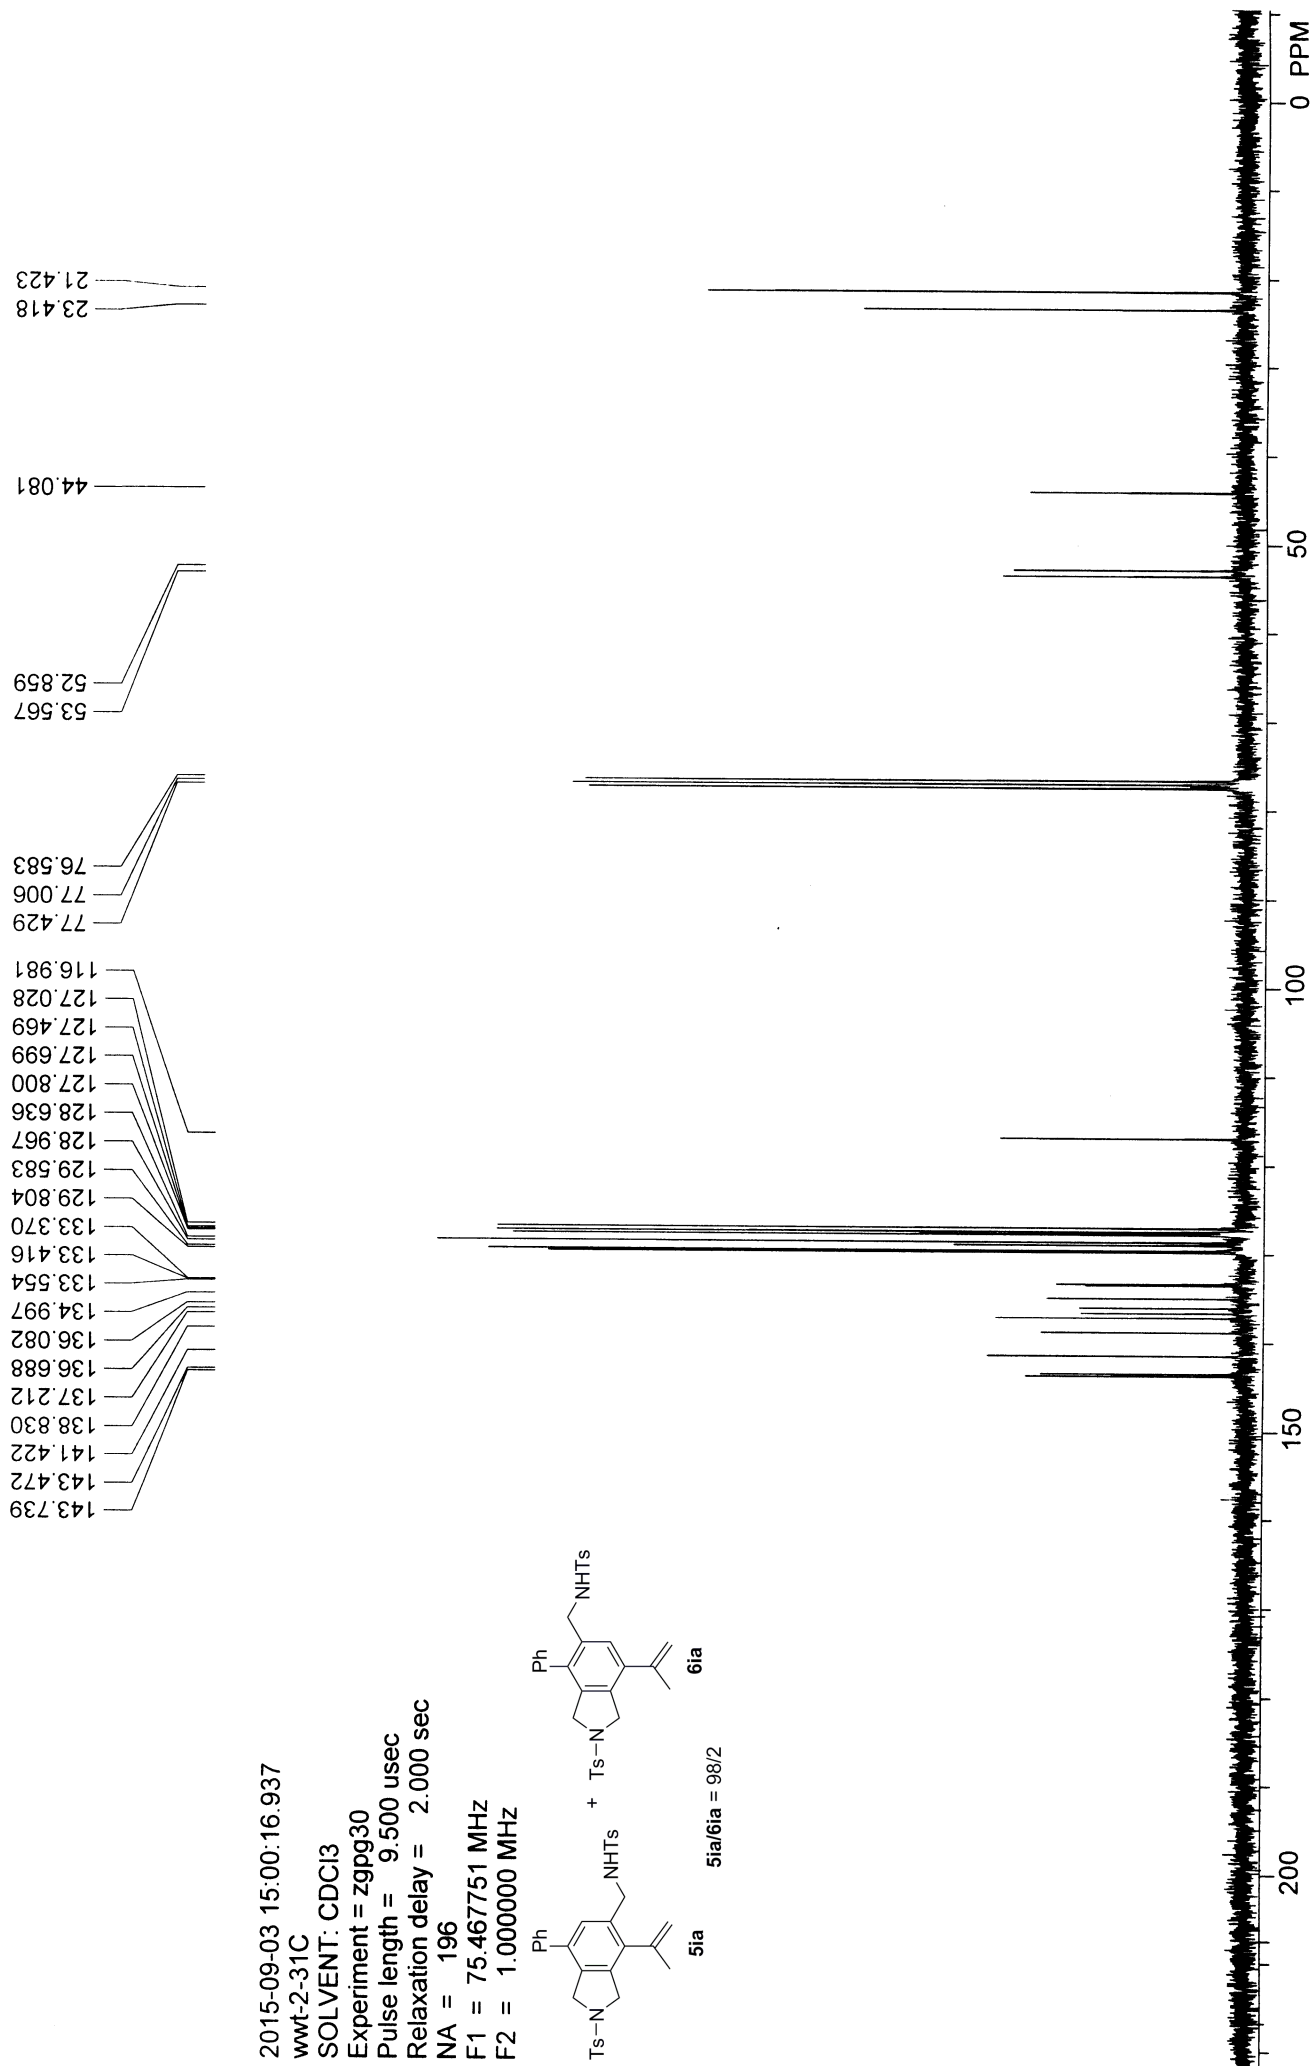

2017-12-24 09:39:48.484

zyc-1-113

SOLVENT: CDCl<sub>3</sub>

Experiment = zg30

Pulse length = 14.000 usec

Relaxation delay = 1.000 sec

NA = 8

F1 = 300.130005 MHz

F2 = 1.000000 MHz

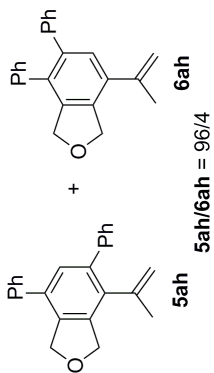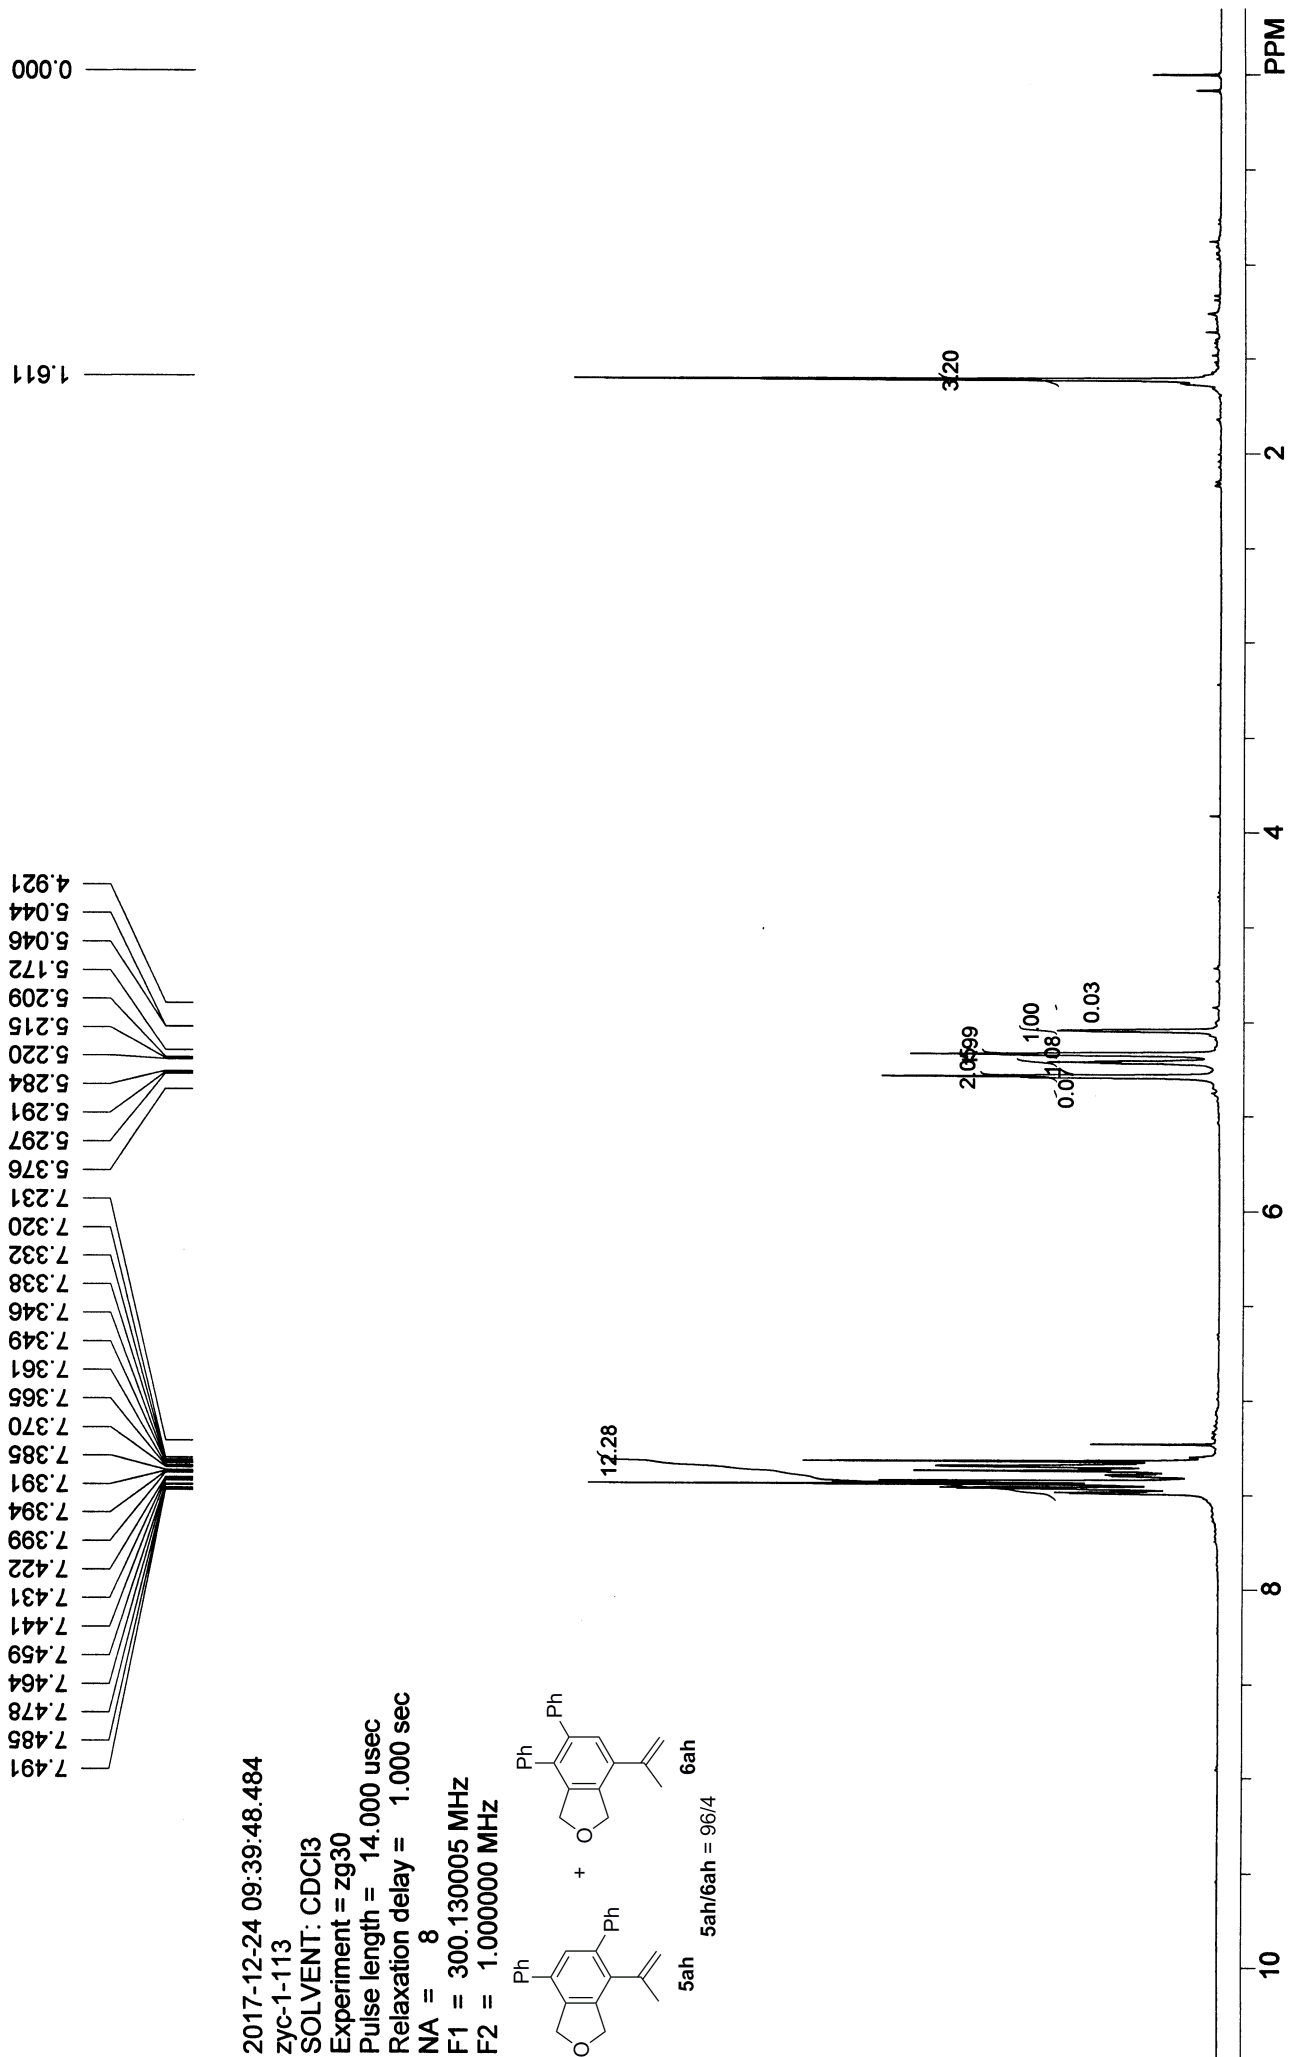

2017-12-24 12:17:19.265

zyc-1-113c

SOLVENT: CDCl<sub>3</sub>

Experiment = zgpg30

Pulse length = 9.500 usec

Relaxation delay = 2.000 sec

NA = 789

F1 = 75.467751 MHz

F2 = 1.000000 MHz

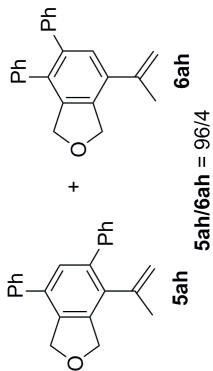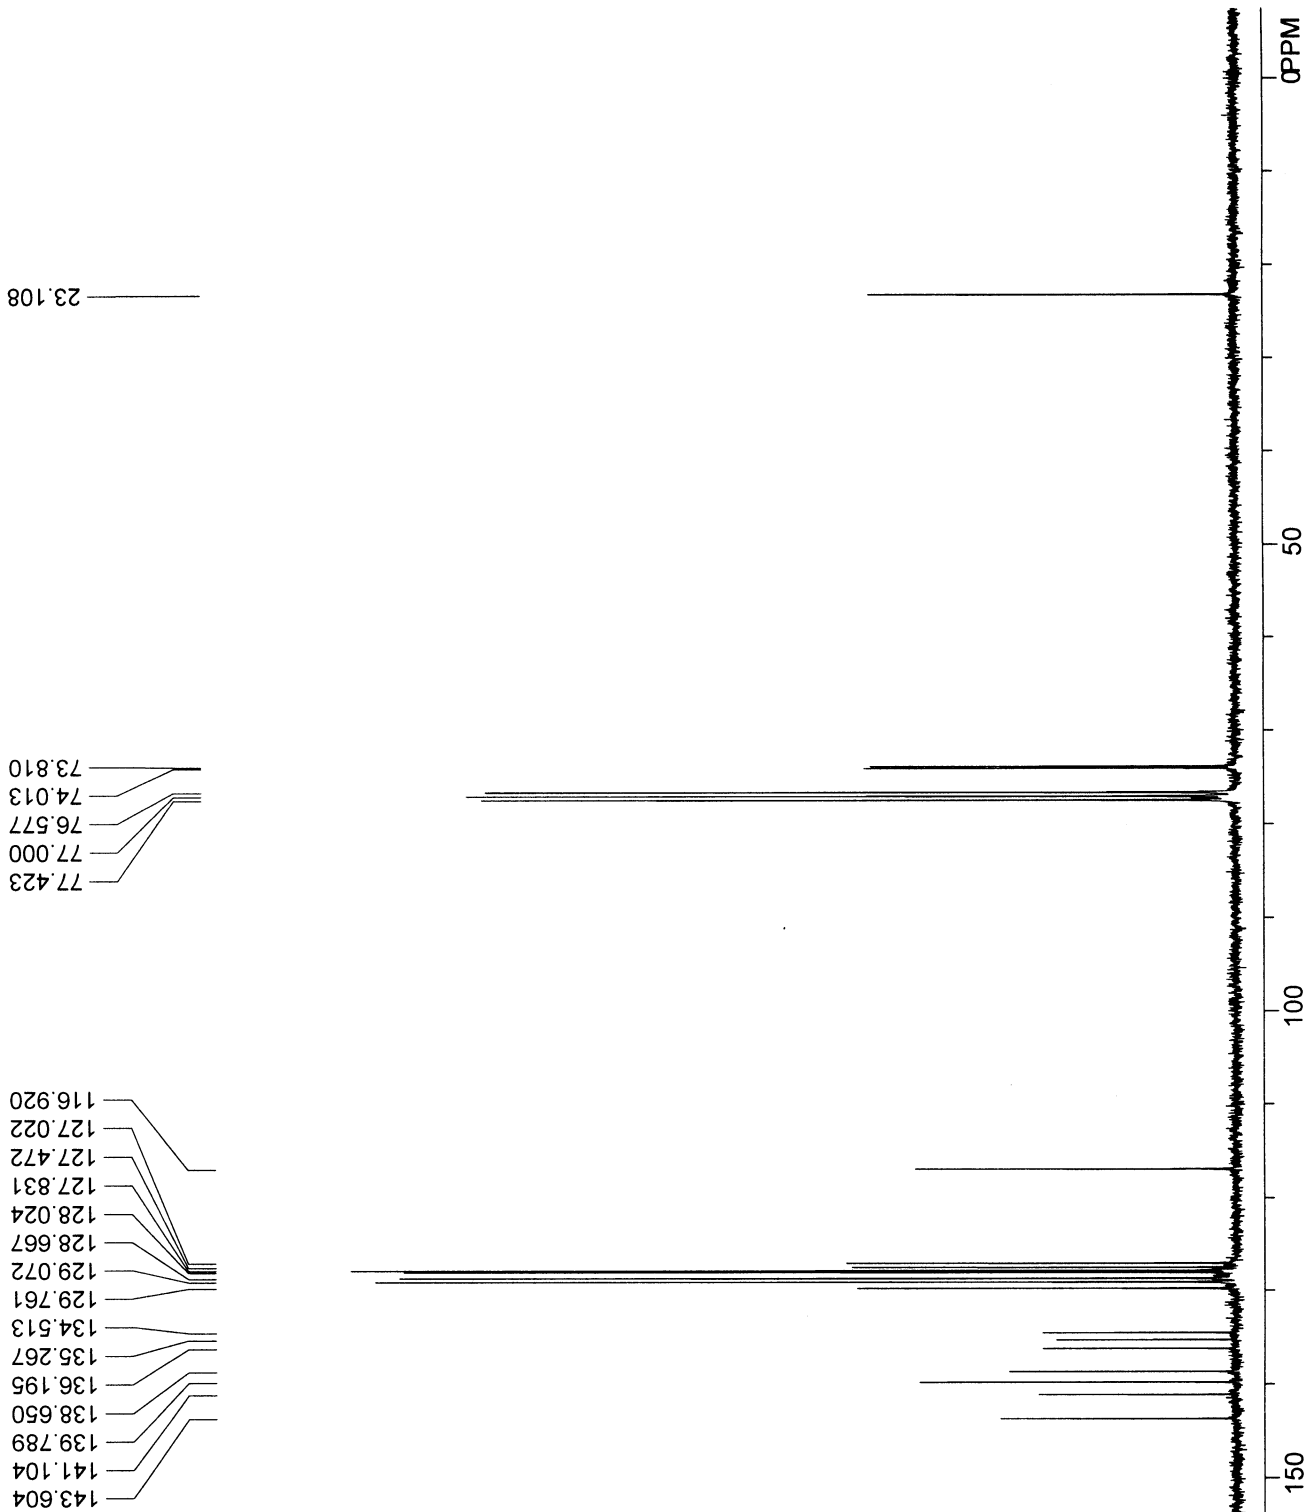

**F2 = 1.000000 MHz**

$$\text{pay} = \frac{35.73}{\frac{119.78}{312.41}} = 93\%$$
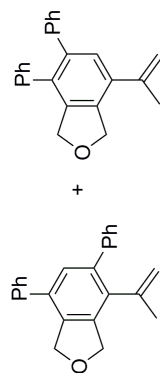
$$5ah/6ah = 96/4$$
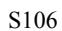

2018-01-02 21:39:50.656  
 zyc-1-113re  
 SOLVENT: CDCl3  
 Experiment = zg30  
 Pulse length = 14.000 usec  
 Relaxation delay = 1.000 sec  
 NA = 8  
 F1 = 300.130005 MHz  
 F2 = 1.000000 MHz

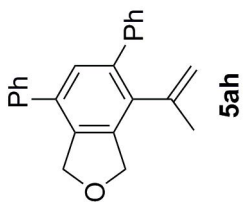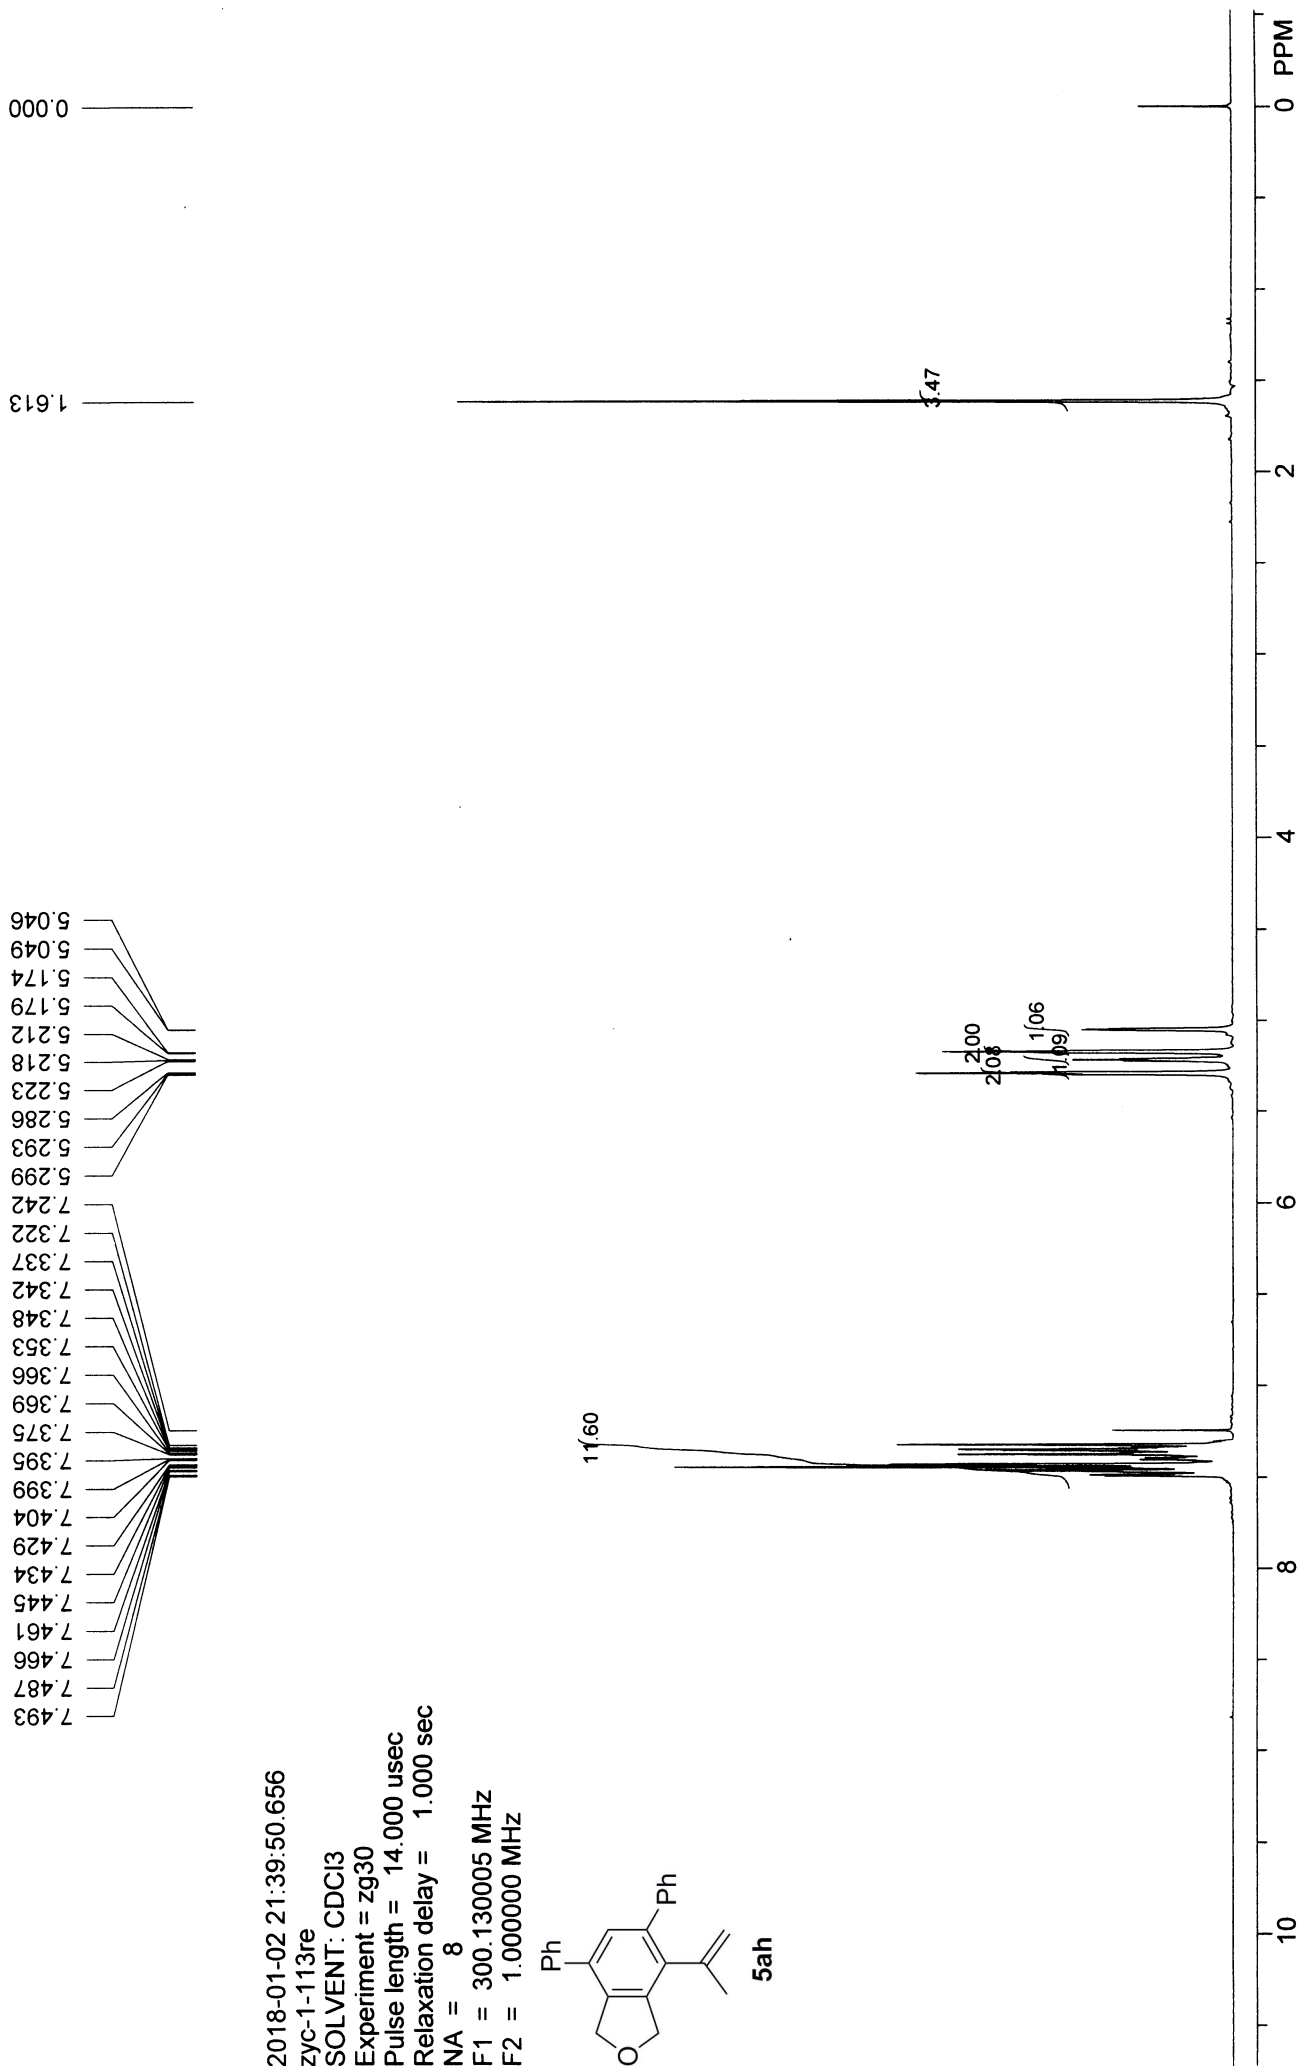

2018-05-27 10:20:37.468  
 zyc-2-28-2H  
 SOLVENT: CDCl3  
 Experiment = zg30  
 Pulse length = 14.000 usec  
 Relaxation delay = 1.000 sec  
 NA = 8  
 F1 = 300.130005 MHz  
 F2 = 1.000000 MHz

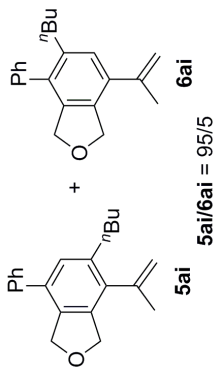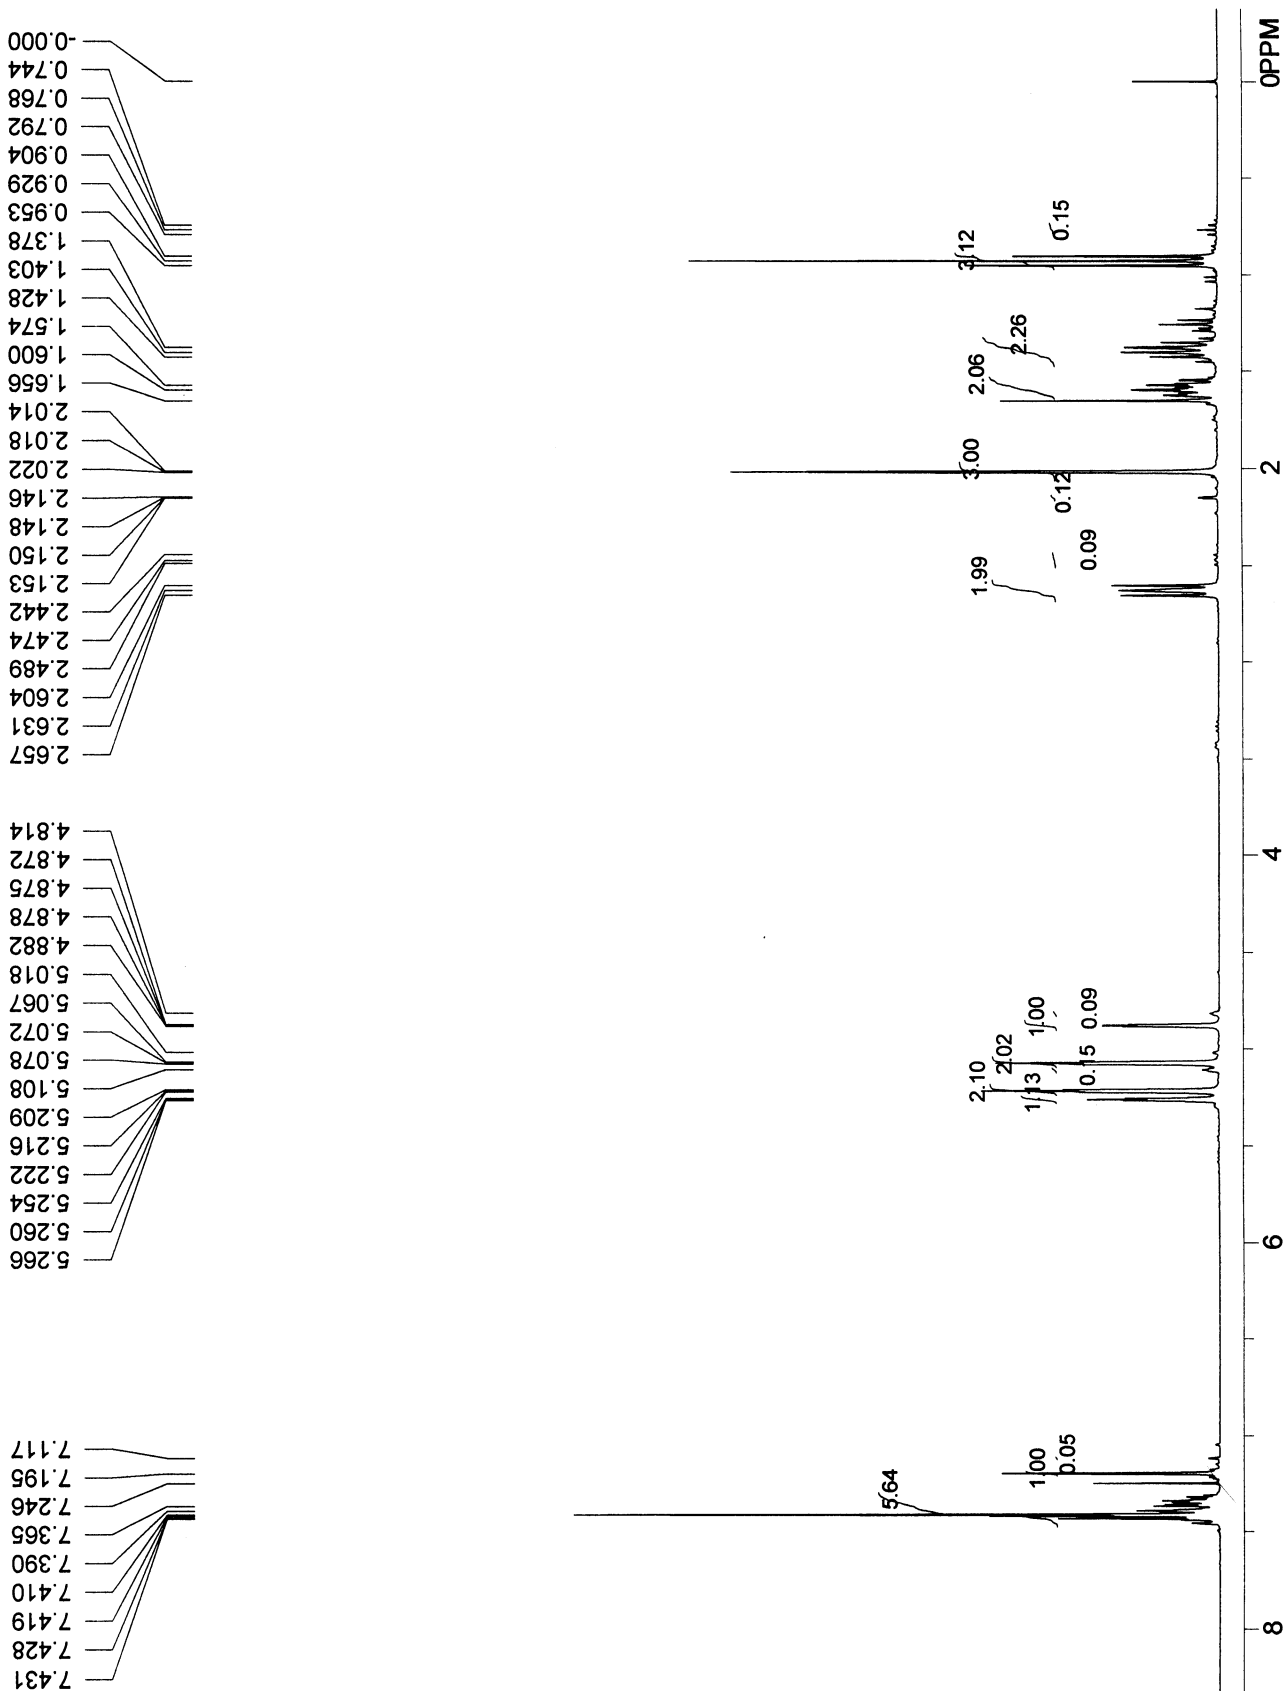



2018-05-25 21:59:06.421

zyc-2-28-2

SOLVENT: CDCl<sub>3</sub>

Experiment = zgpg30

Pulse length = 9.500 usec

Relaxation delay = 2.000 sec

NA = 102

F1 = 75.467751 MHz

F2 = 1.000000 MHz

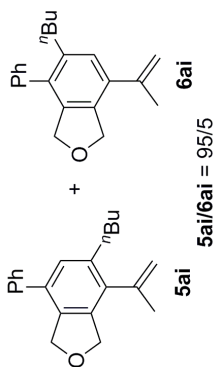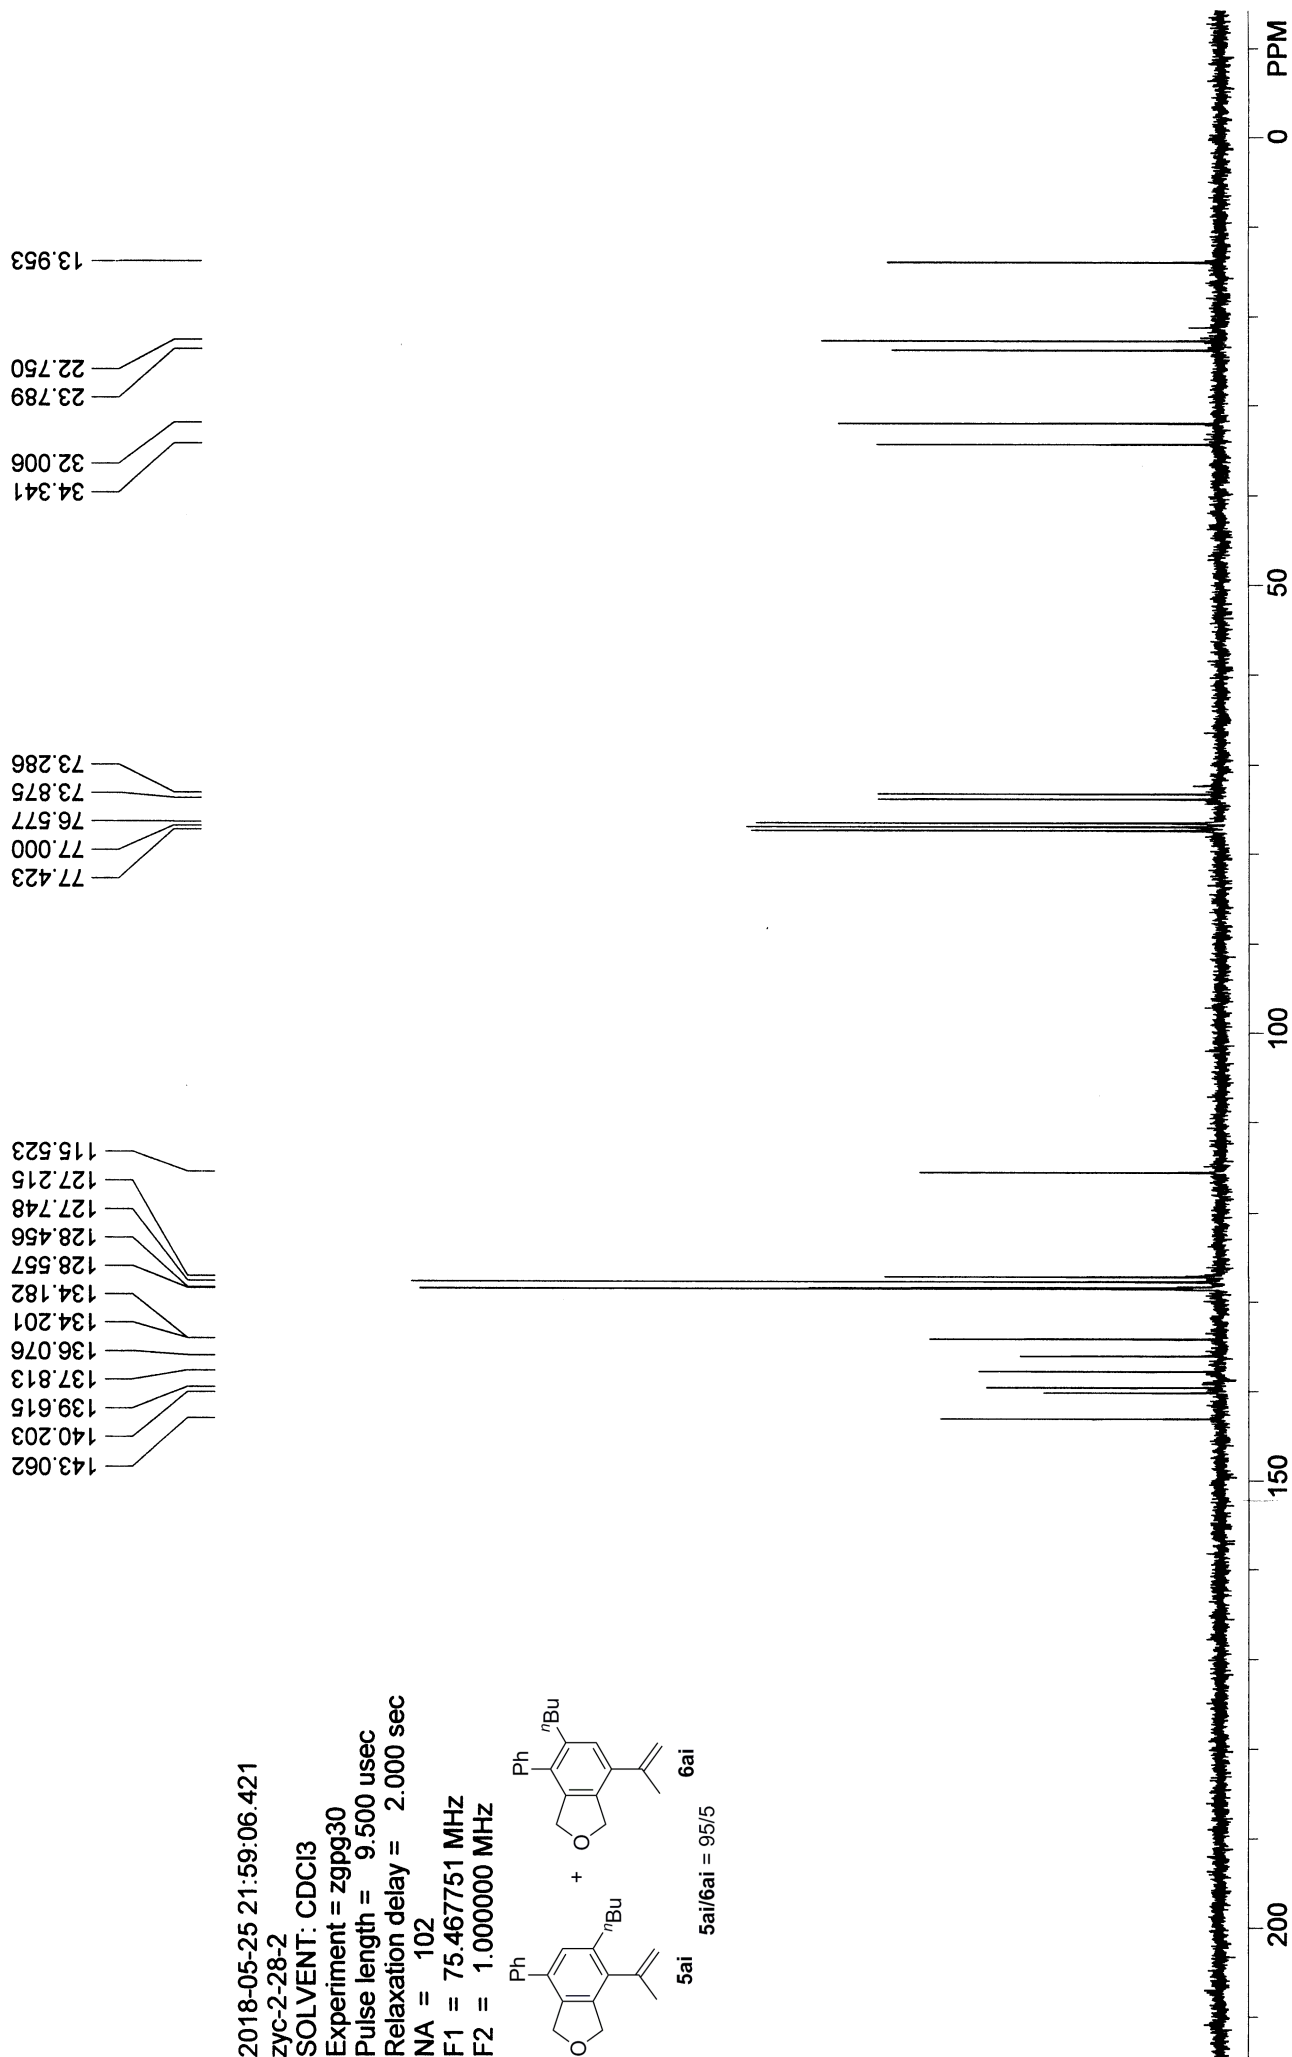

2018-05-27 11:28:06.718

zyc-2-28-2purity

SOLVENT: CDCl3

Experiment = zg30

Pulse length = 14.000 usec

Relaxation delay = 1.000 sec

NA = 8

F1 = 300.130005 MHz

F2 = 1.000000 MHz

98.4  $\mu$ g sample added 11  $\mu$ L 

$$\text{purity} = \frac{292.42 \times \frac{11}{46} \times \frac{127.29}{0.95 \times 100}}{98.4} \times 100\%$$

$$= 95.2\%$$

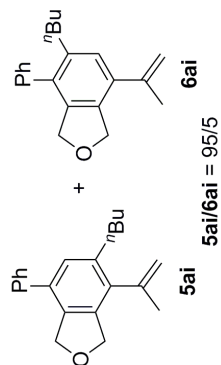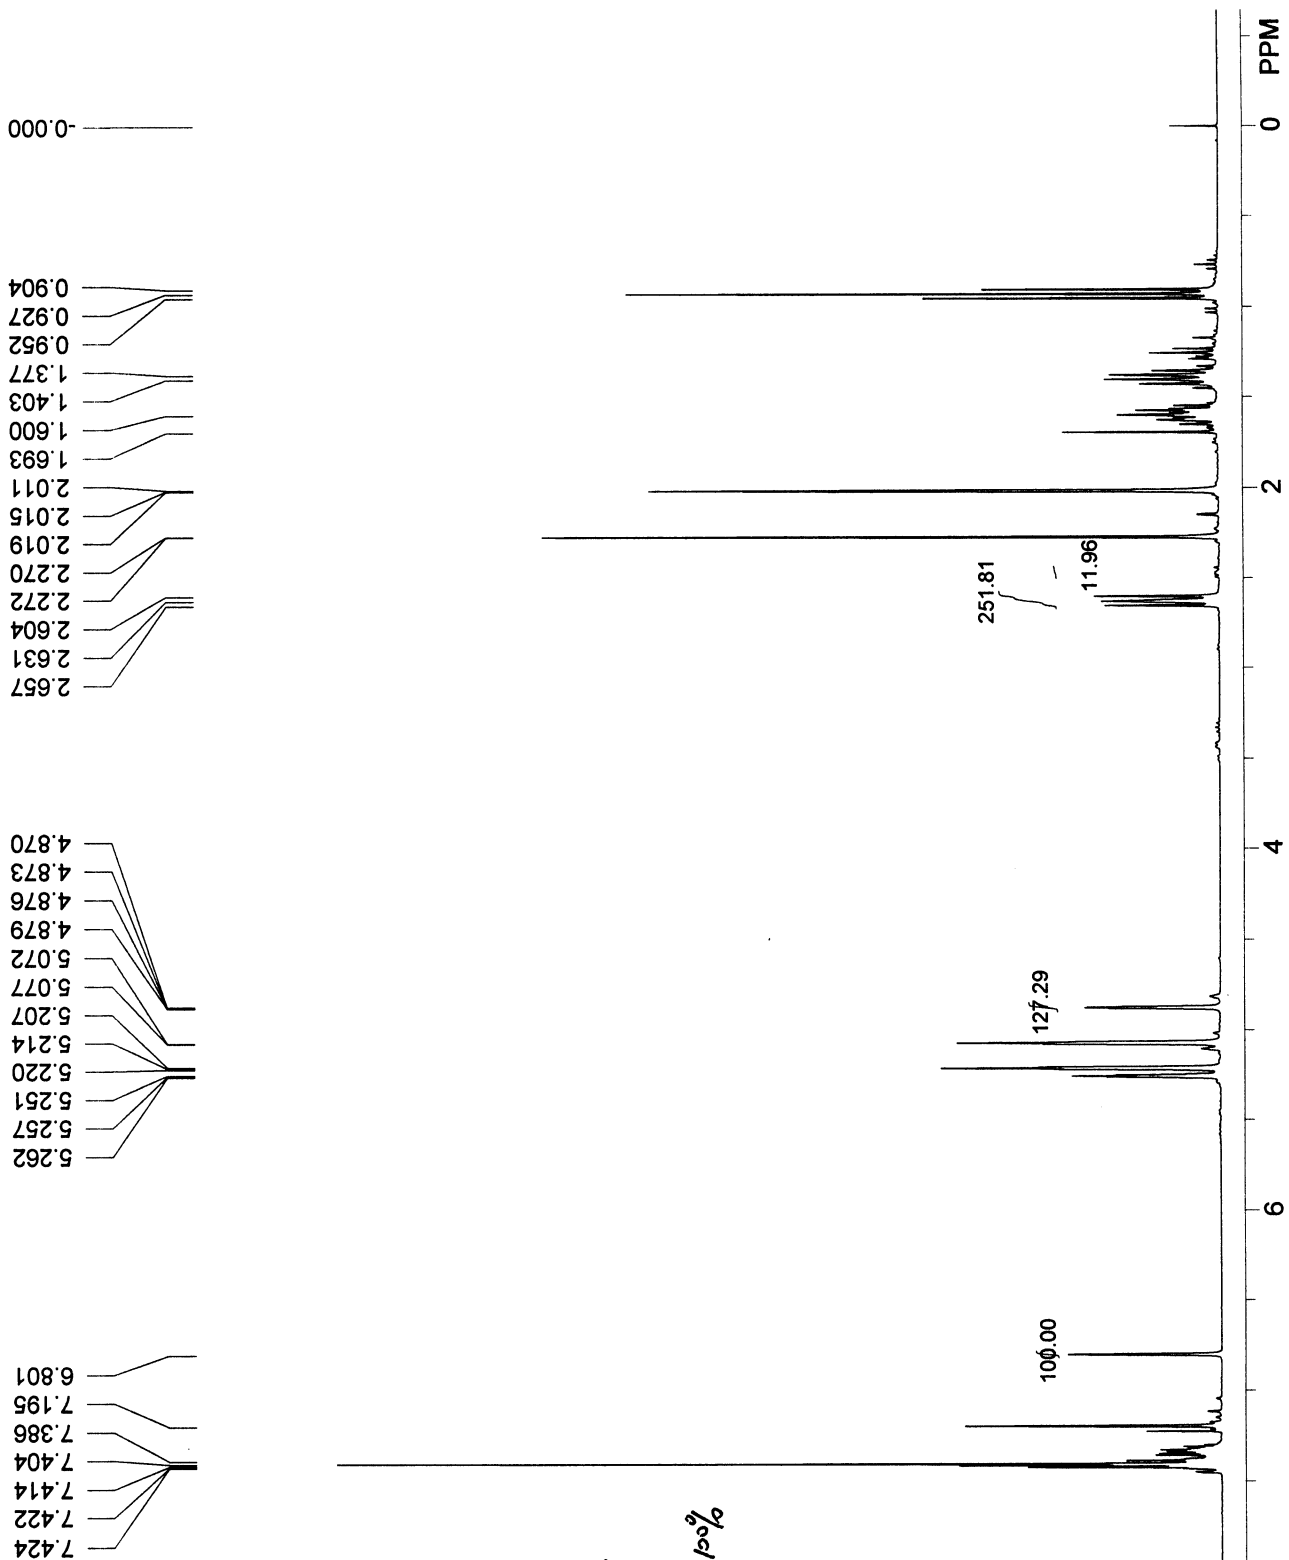

2018-06-01 09:34:08.187

zyc-2-35

SOLVENT: CDCl<sub>3</sub>

Experiment = zg30

Pulse length = 14.000 usec

Relaxation delay = 1.000 sec

NA = 8

F1 = 300.130005 MHz

F2 = 1.000000 MHz

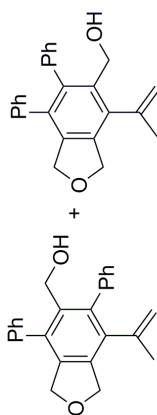

10.48

6aj

5aj

5aj/6aj &gt; 99/1

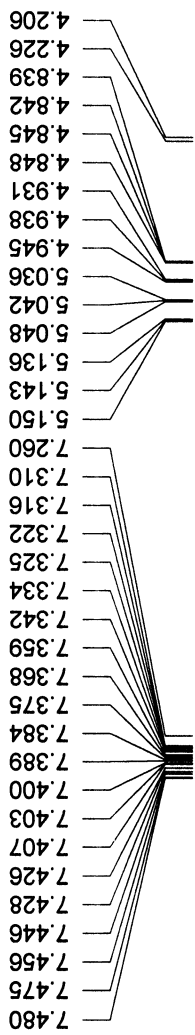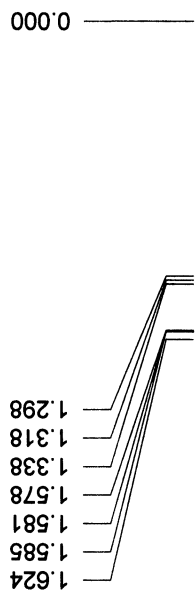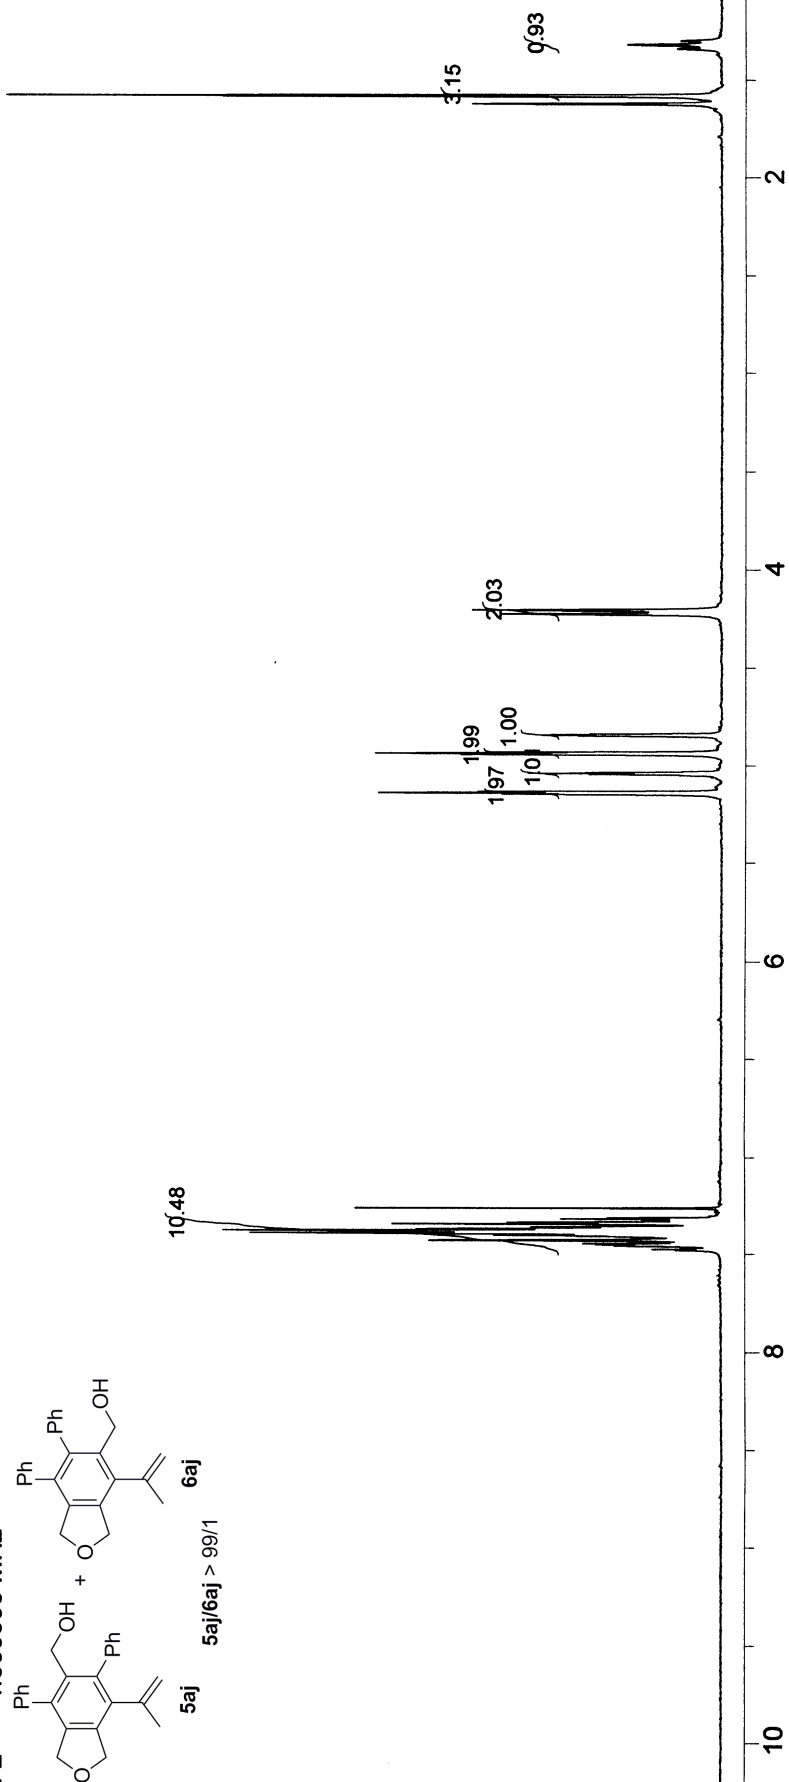

2018-05-29 21:41:41.187

zyc-2-35

SOLVENT: CDCl<sub>3</sub>

Experiment = zgpg30

Pulse length = 9.500 usec

Relaxation delay = 2.000 sec

NA = 43

F1 = 75.467751 MHz

F2 = 1.000000 MHz

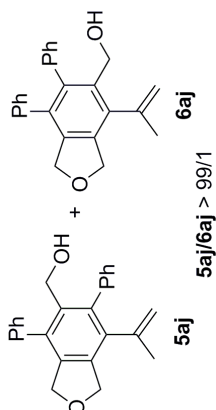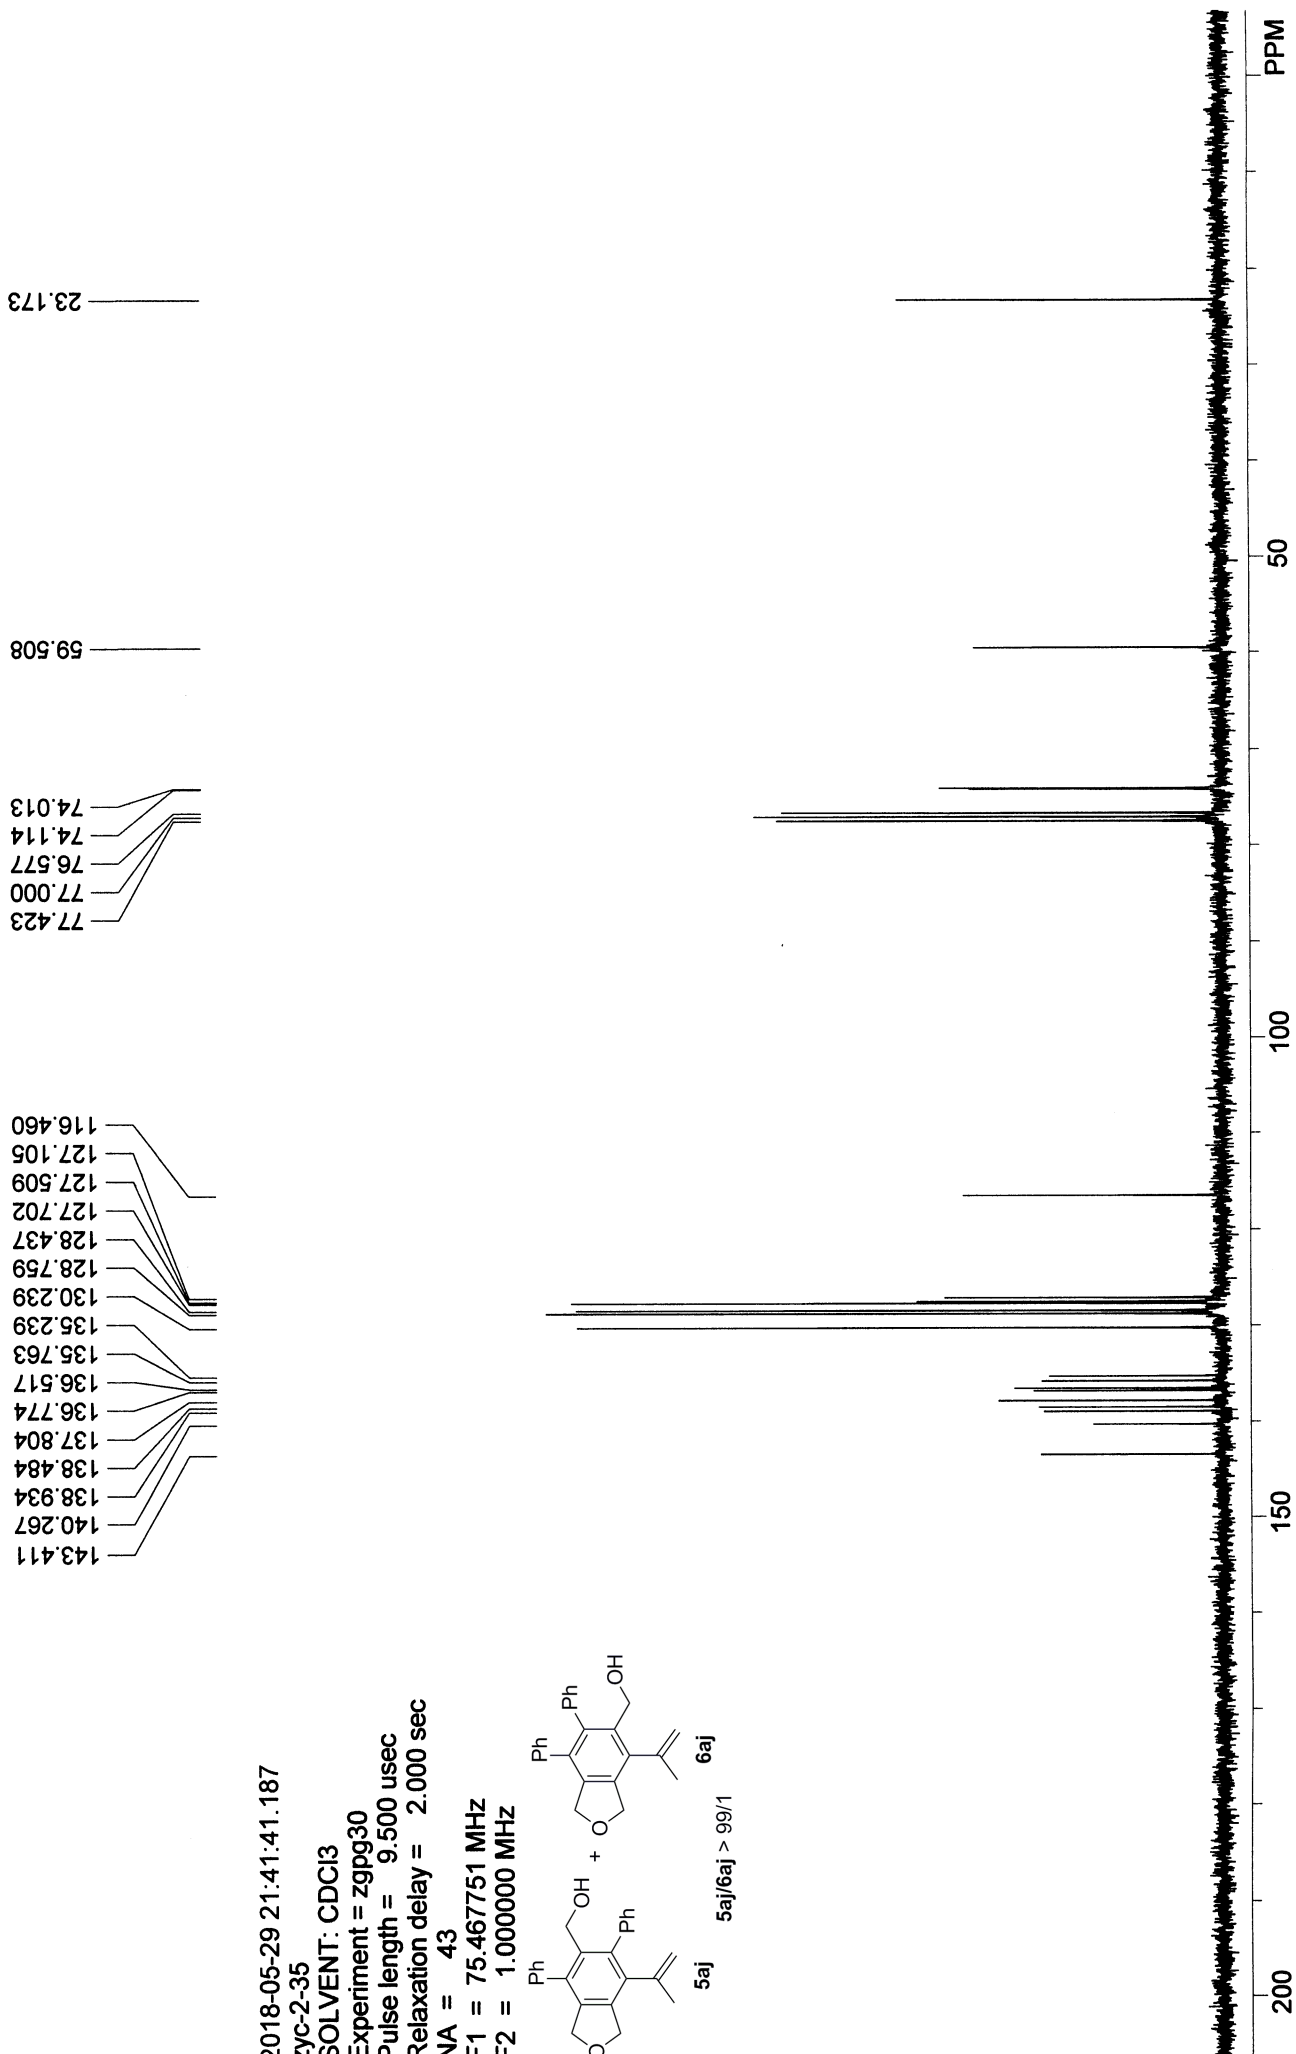

2018-06-26 17:23:54.234

zyc-2-51H

SOLVENT: CDCl3

Experiment = zg30

Pulse length = 14.000 usec

Relaxation delay = 1.000 sec

NA = 8

F1 = 300.130005 MHz

F2 = 1.000000 MHz

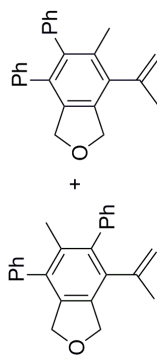

5ak

6ak

5ak/6ak = 92/8

10.64

3.05

3.02

0.48

2.09

2.16

1.05

1.00

0.08

0.17

0.50

0.32

-0.000

1.570

1.849

2.047

4.833

4.836

4.839

4.843

4.916

4.922

4.929

4.963

5.013

5.019

5.025

5.133

5.266

5.272

5.277

6.966

6.992

7.013

7.020

7.093

7.119

7.147

7.165

7.203

7.207

7.229

7.234

7.251

7.273

7.279

7.304

7.327

7.341

7.365

7.395

7.419

7.443

0PPM

2

4

6

8

10

2018-06-26 18:56:54.484  
 zyc-2-51  
 SOLVENT: CDCl3  
 Experiment = zgpg30  
 Pulse length = 9.500 usec  
 Relaxation delay = 2.000 sec  
 NA = 1561  
 F1 = 75.467751 MHz  
 F2 = 1.000000 MHz

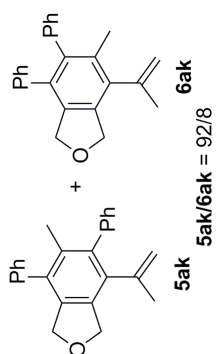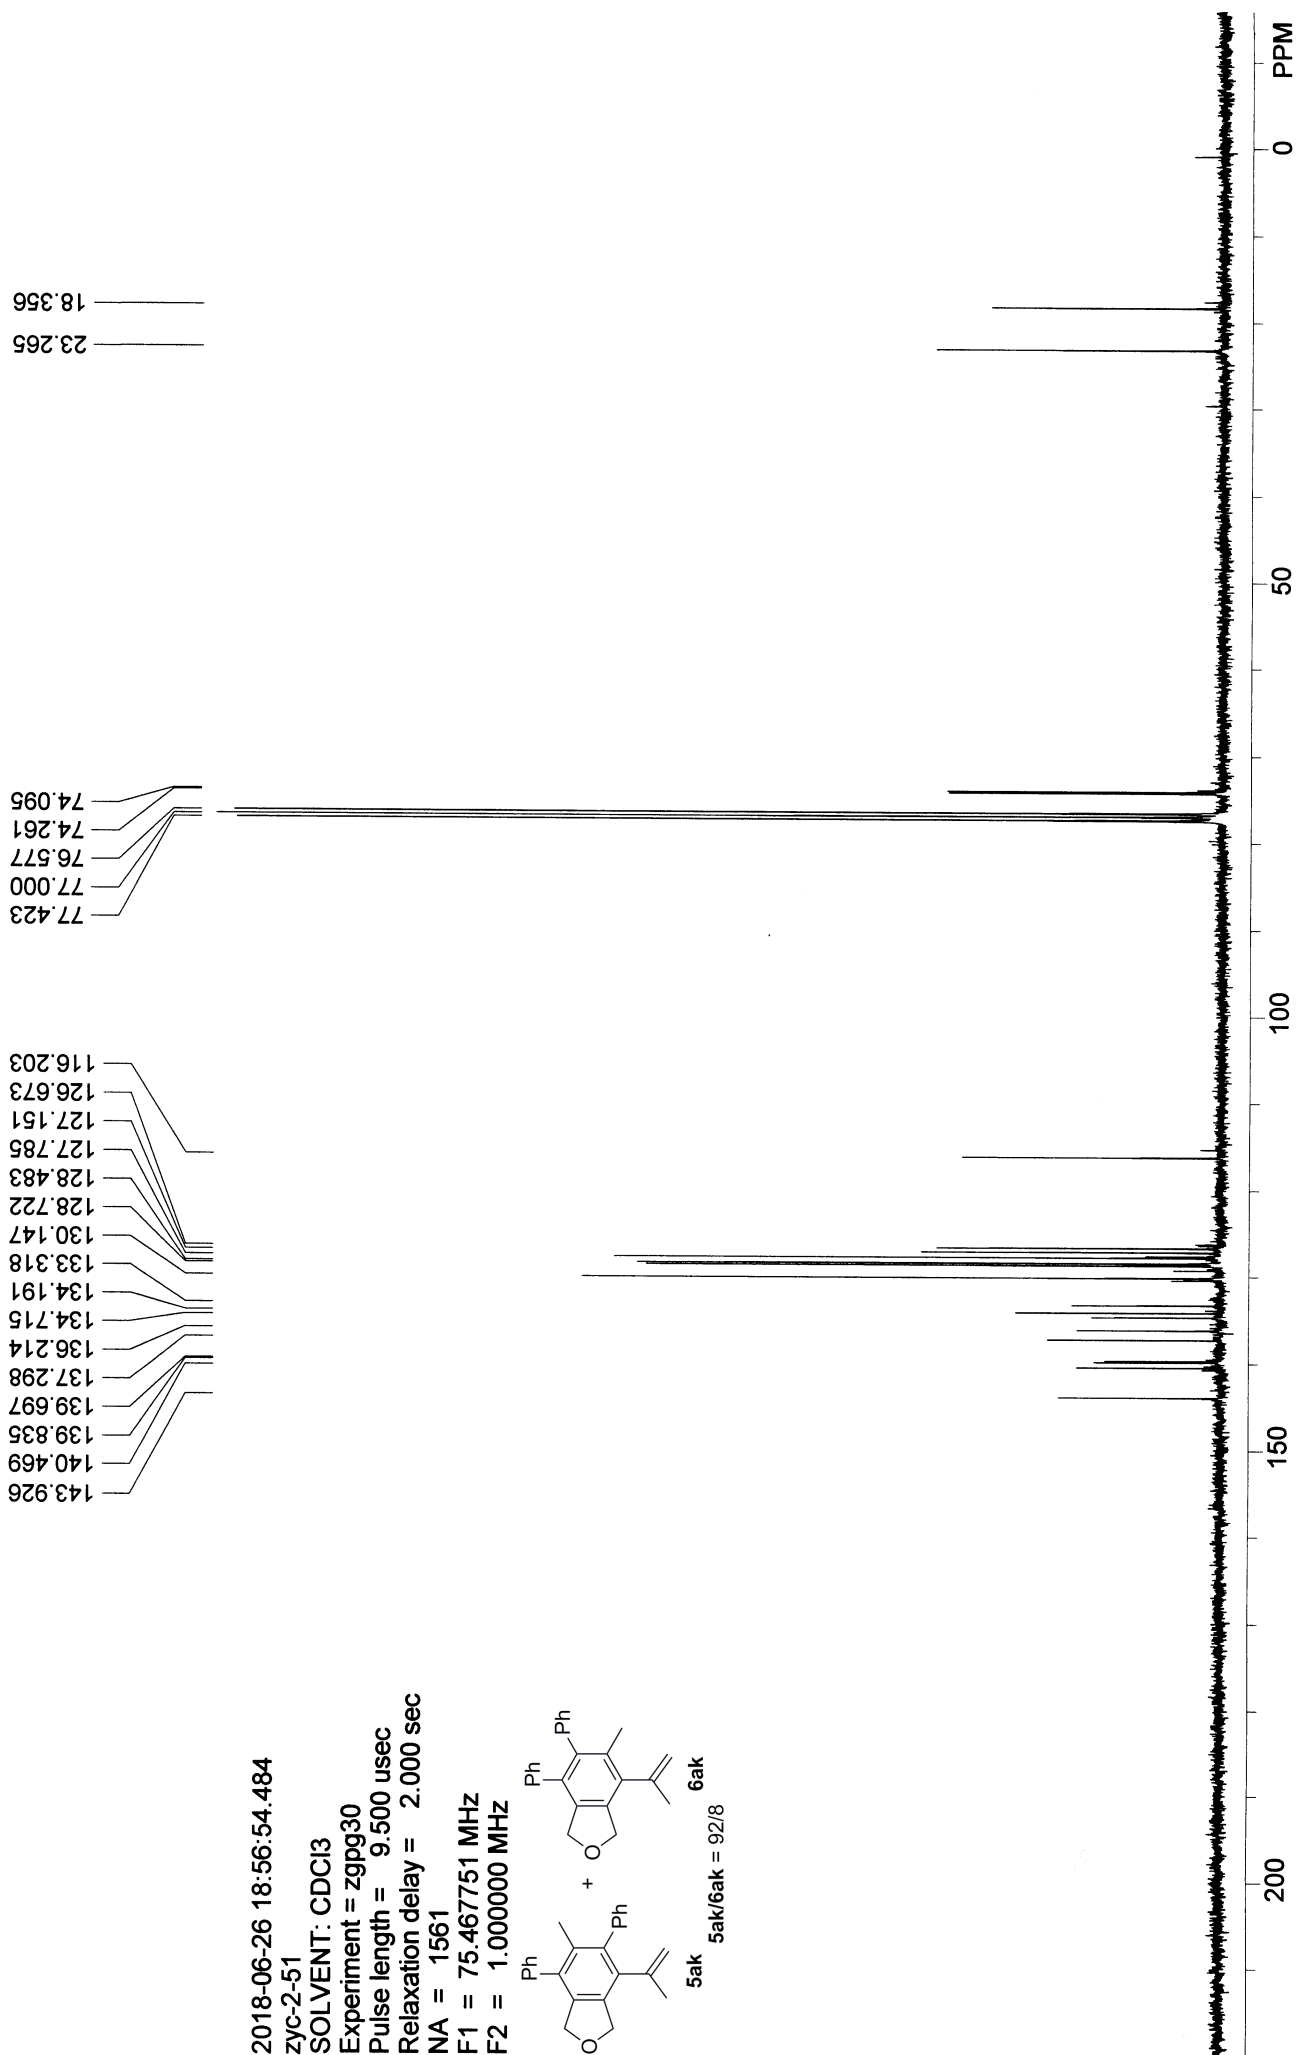

2018-07-10 16:39:25.046  
 zyc-2-60crystal  
 SOLVENT: CDCl<sub>3</sub>  
 Experiment = zg30  
 Pulse length = 14.000 usec  
 Relaxation delay = 1.000 sec  
 NA = 8  
 F1 = 300.130005 MHz  
 F2 = 1.000000 MHz

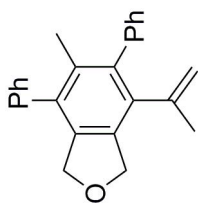

5ak

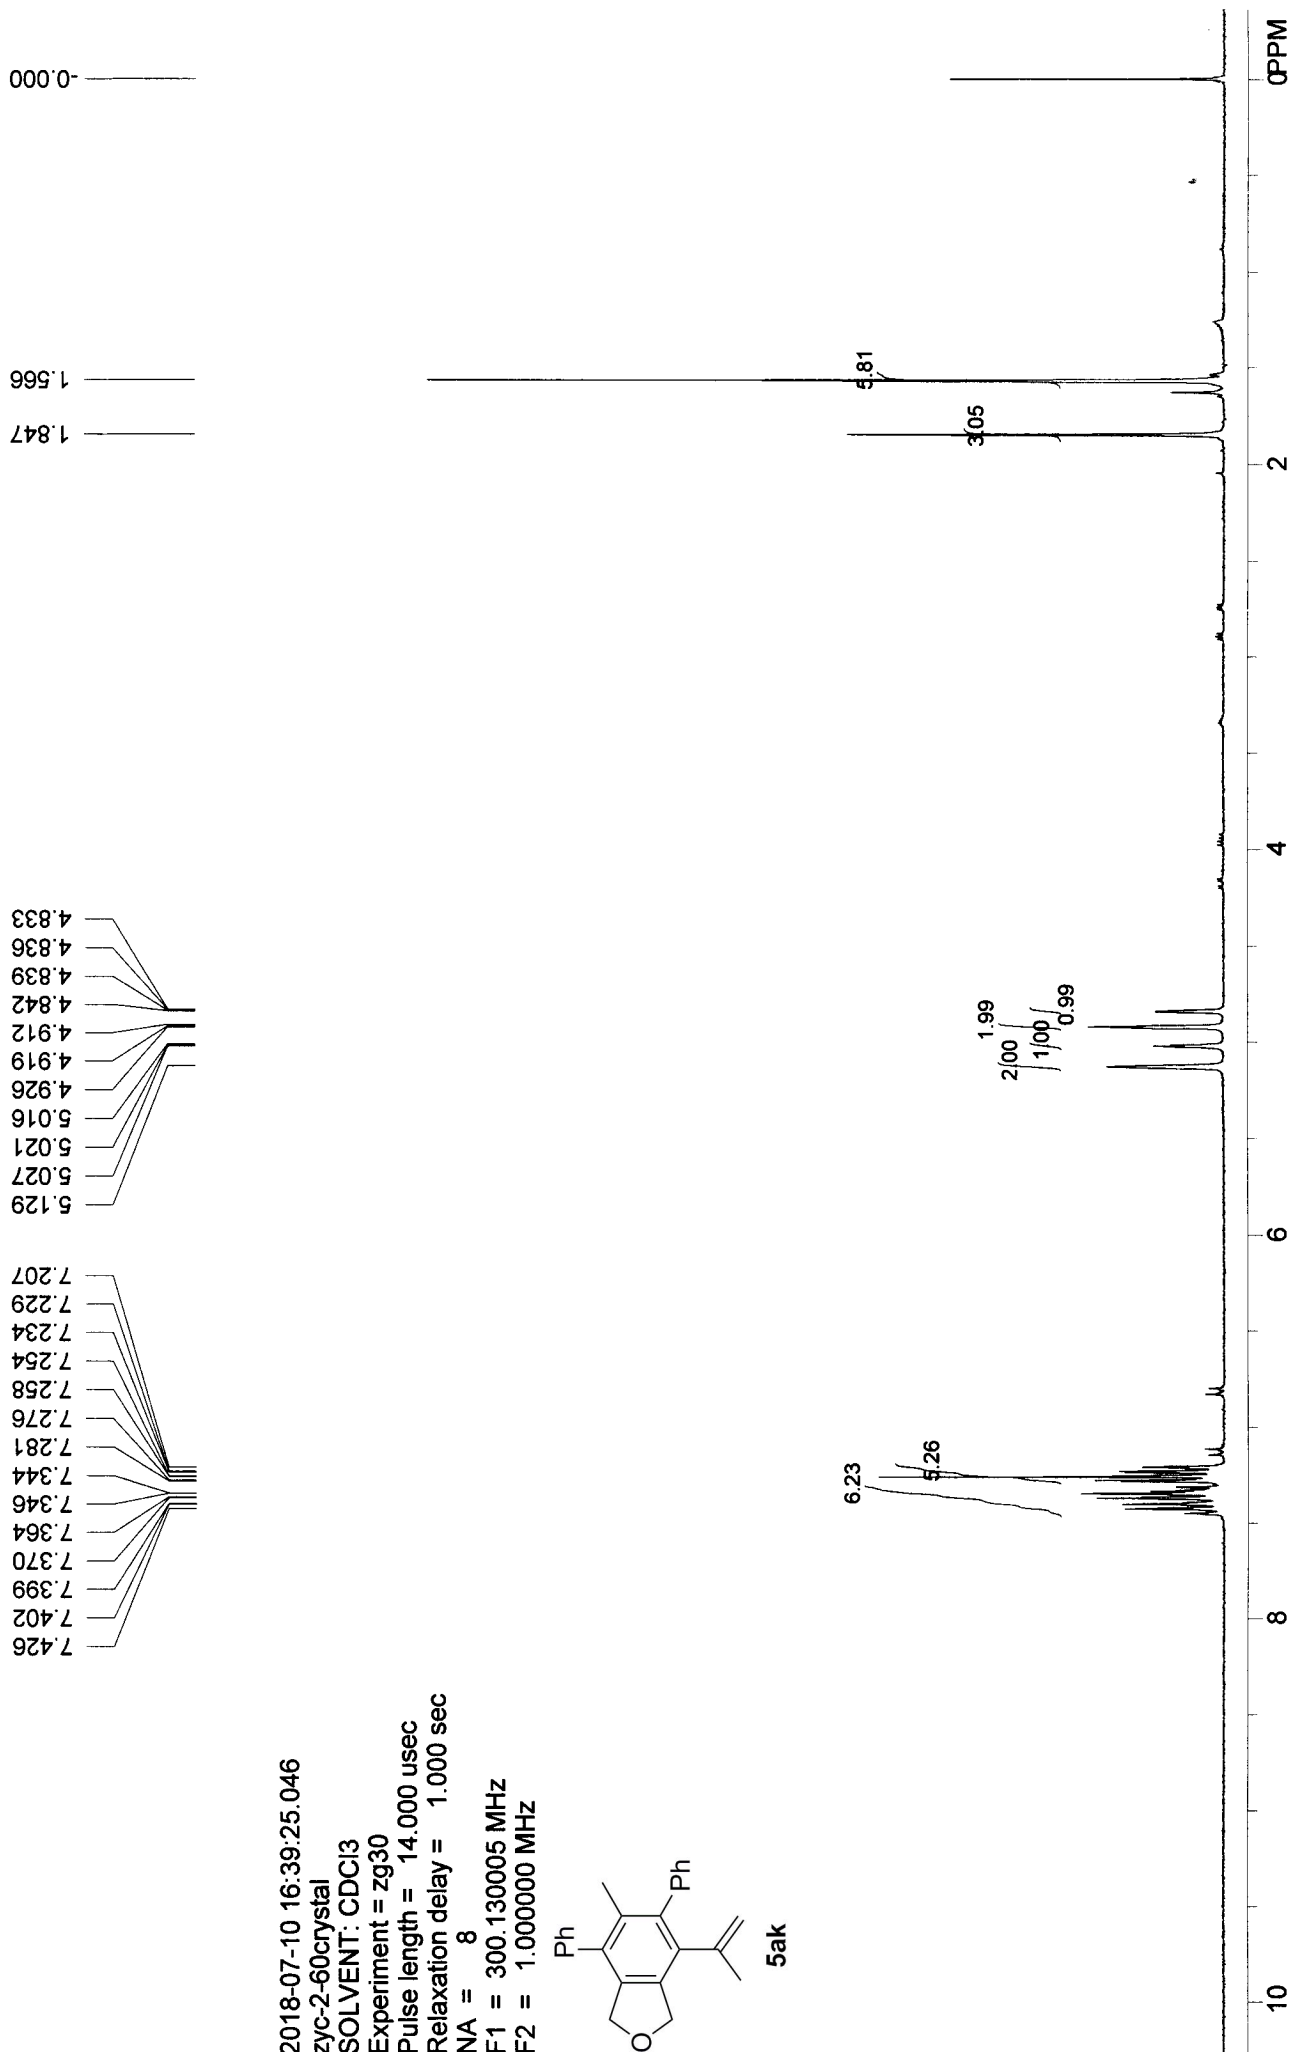

2018-07-10 21:14:37.234  
 zyc-2-74H  
 SOLVENT: CDCl<sub>3</sub>  
 Experiment = zg30  
 Pulse length = 14.000 usec  
 Relaxation delay = 1.000 sec  
 NA = 8  
 F1 = 300.130005 MHz  
 F2 = 1.000000 MHz

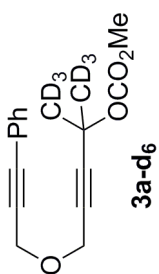

S116

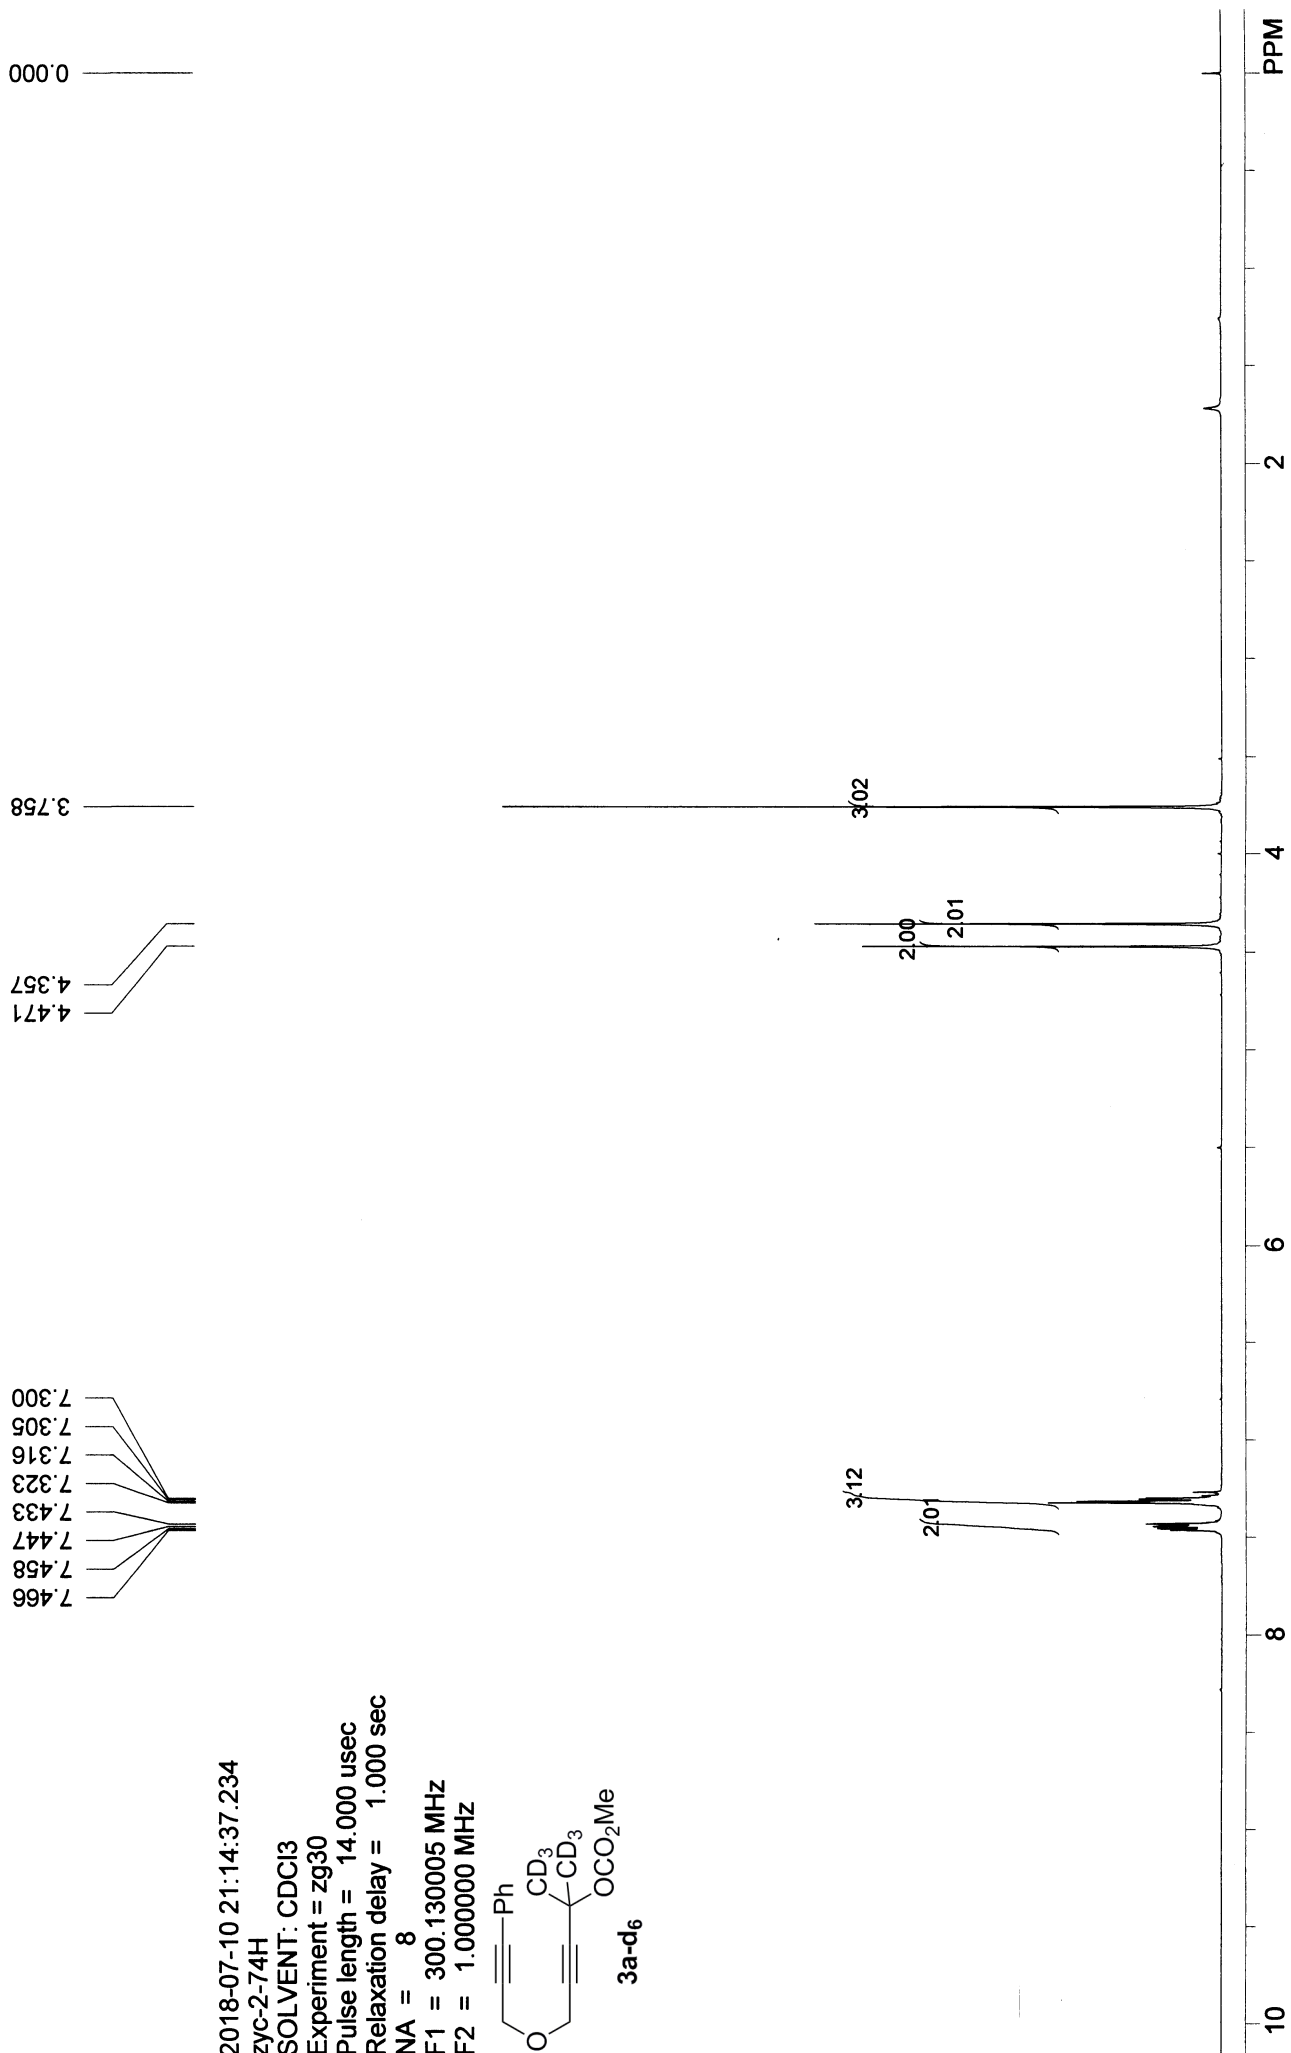



2018-07-12 09:48:06.015  
 zyc-2-74  
 SOLVENT: CDCl<sub>3</sub>  
 Experiment = zgpg30  
 Pulse length = 9.500 usec  
 Relaxation delay = 2.000 sec  
 NA = 11280  
 F1 = 75.467751 MHz  
 F2 = 1.000000 MHz

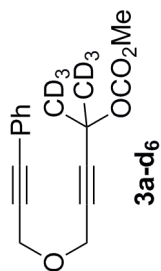

S117

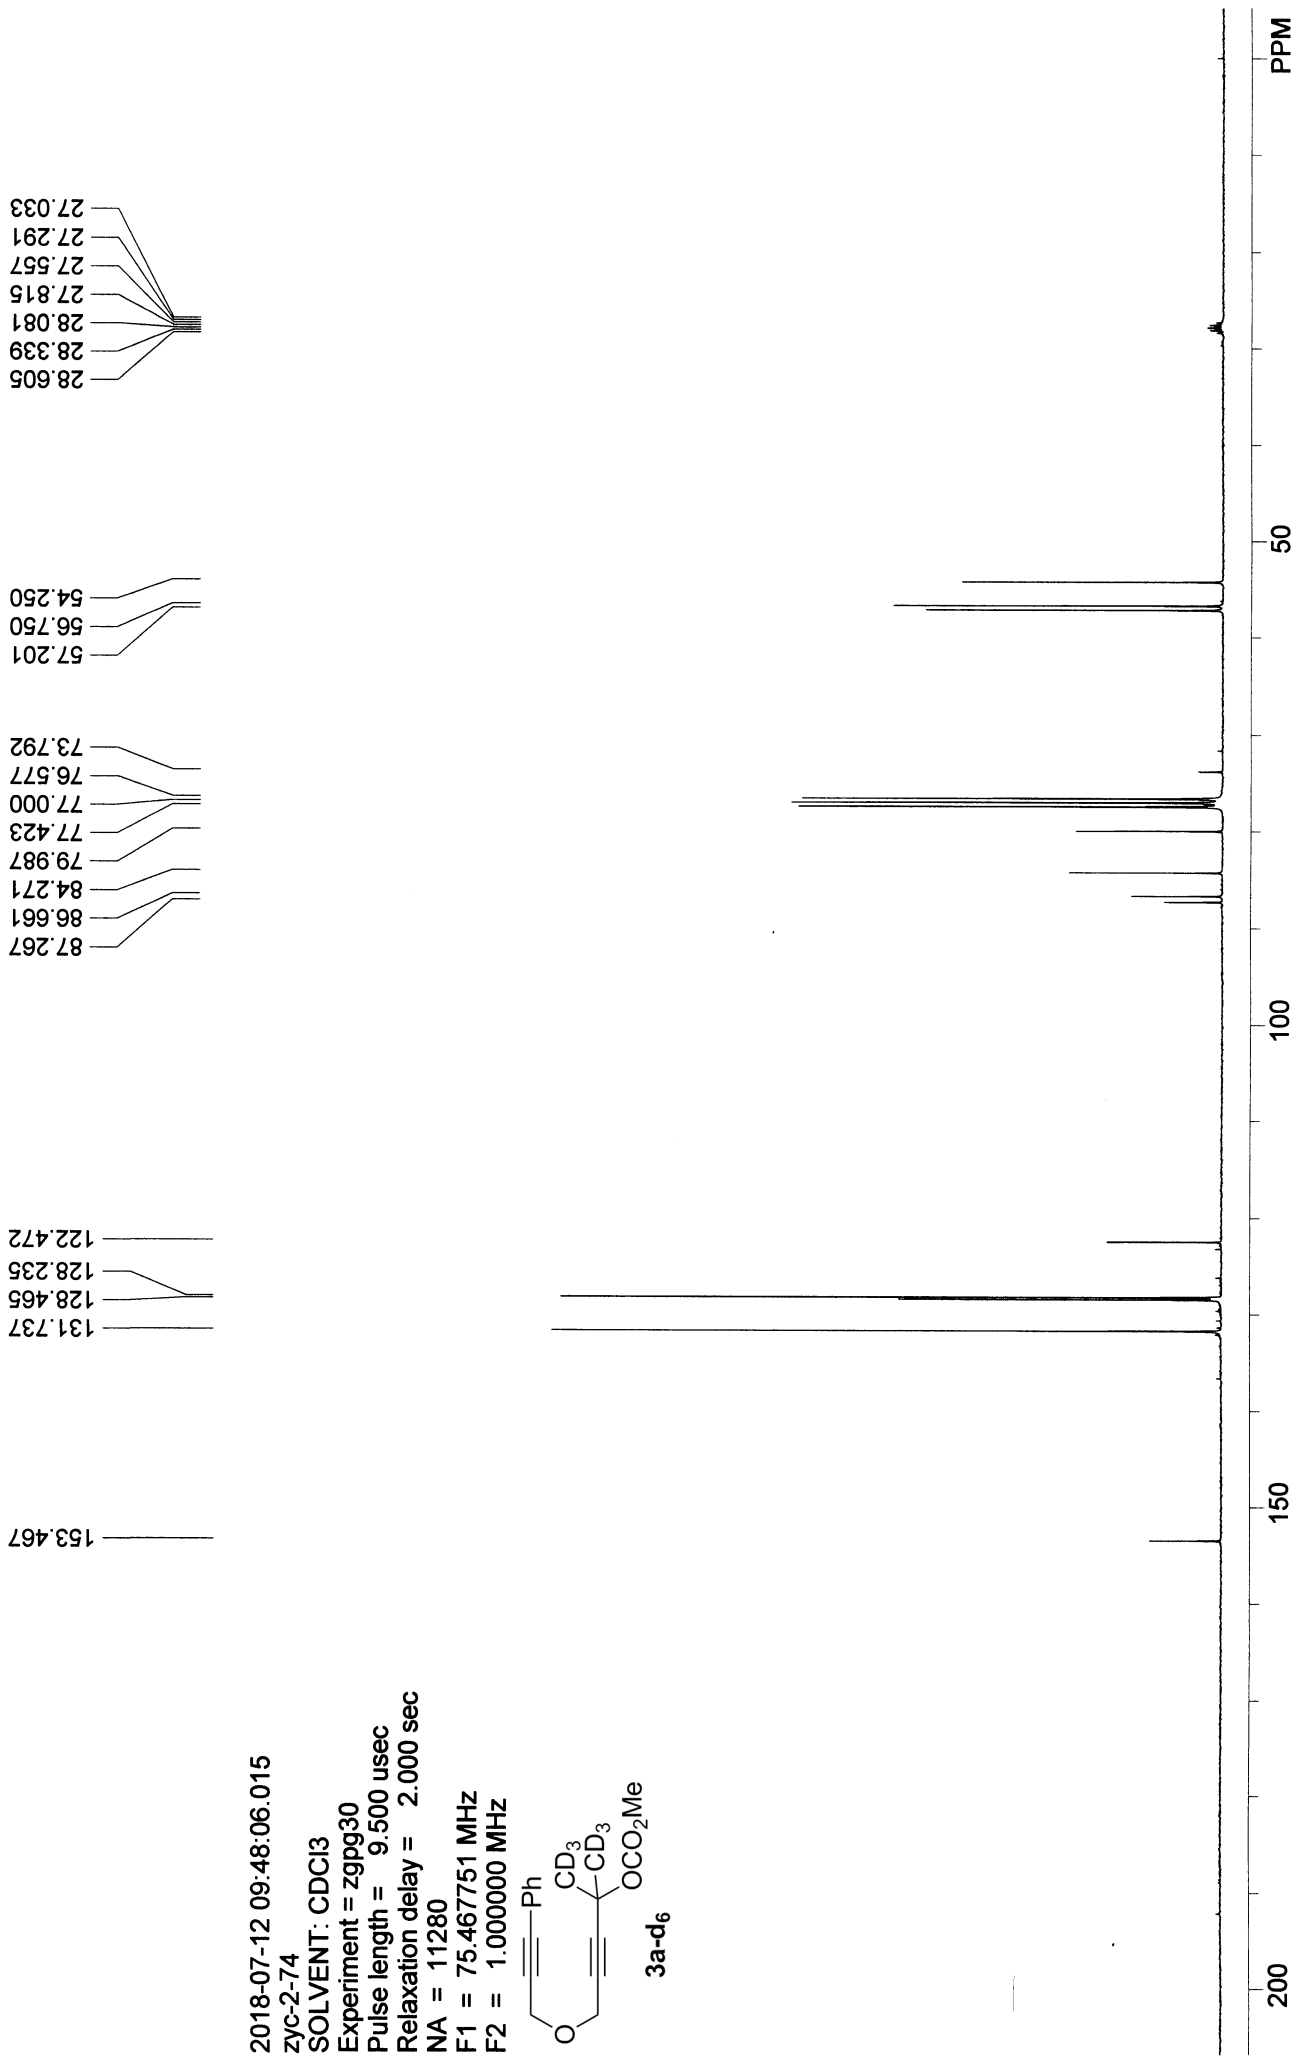

2018-07-11 22:04:41.062

zyc-2-76

SOLVENT: CDCl<sub>3</sub>

Experiment = zg30

Pulse length = 14.000 usec

Relaxation delay = 1.000 sec

NA = 8

F1 = 300.130005 MHz

F2 = 1.000000 MHz

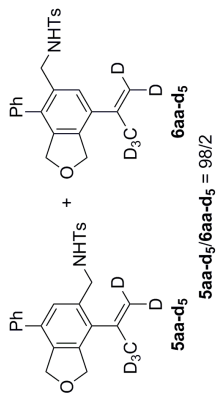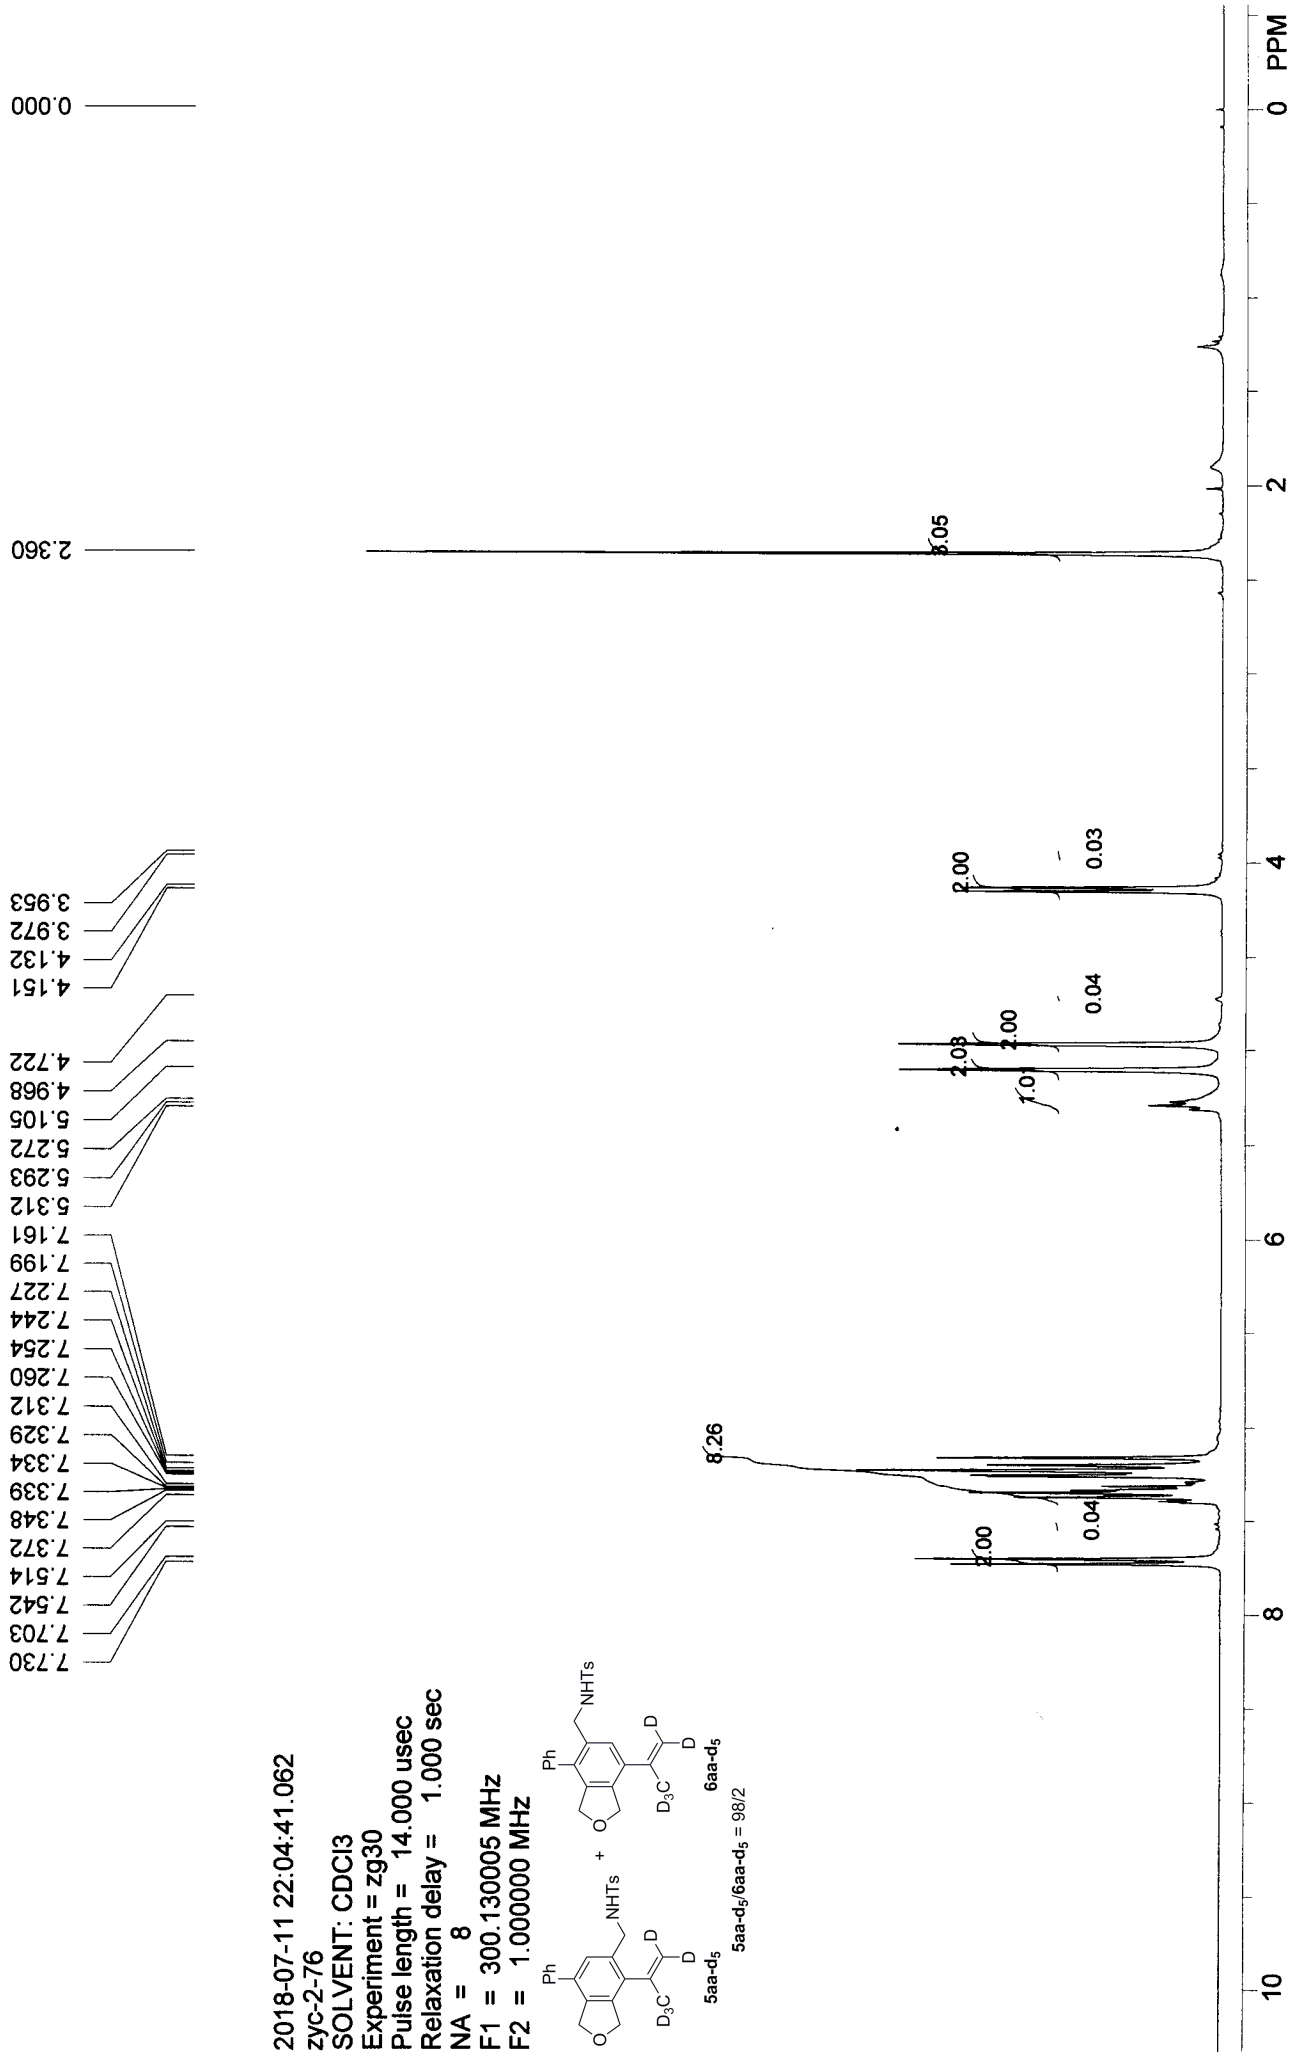

2018-07-13 09:14:55.328

zyc-2-76C

SOLVENT: CDCl<sub>3</sub>

Experiment = zgpg30

Pulse length = 9.500 usec

Relaxation delay = 2.000 sec

NA = 11005

F1 = 75.467751 MHz

F2 = 1.000000 MHz

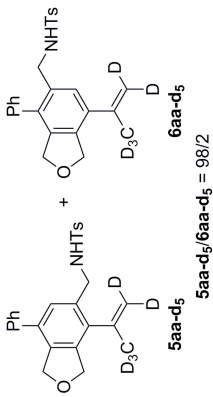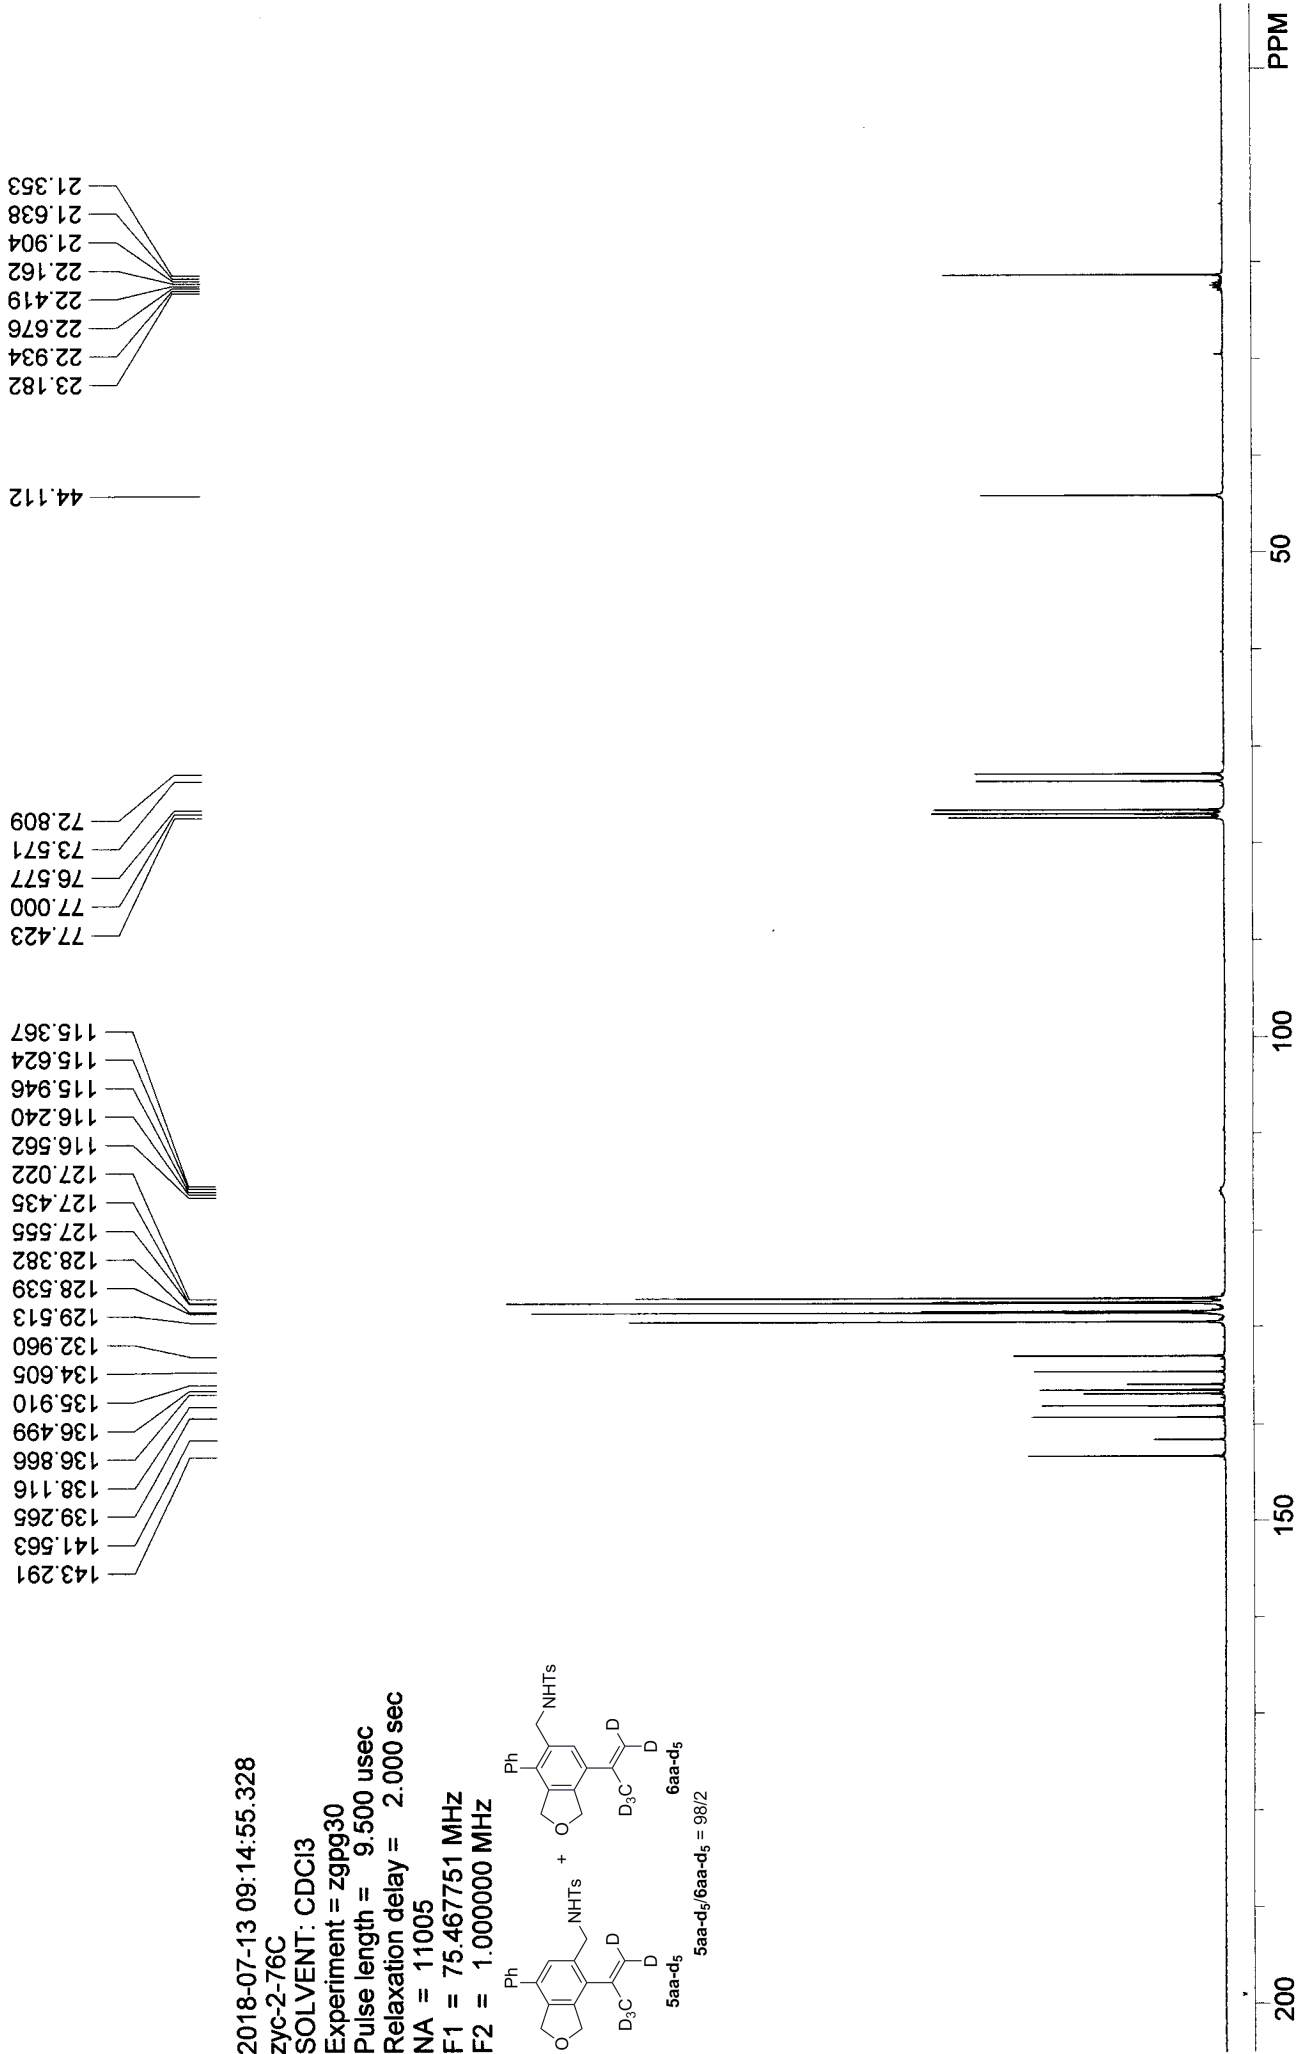

2018-09-01 09:30:16.578

zyc-2-76re

SOLVENT: CDCl<sub>3</sub>

Experiment = zg30

Pulse length = 14.000 usec

Relaxation delay = 1.000 sec

NA = 8

F1 = 300.130005 MHz

F2 = 1.000000 MHz

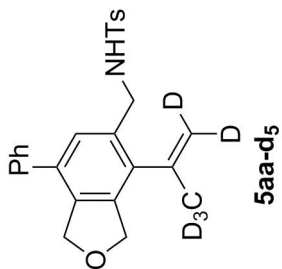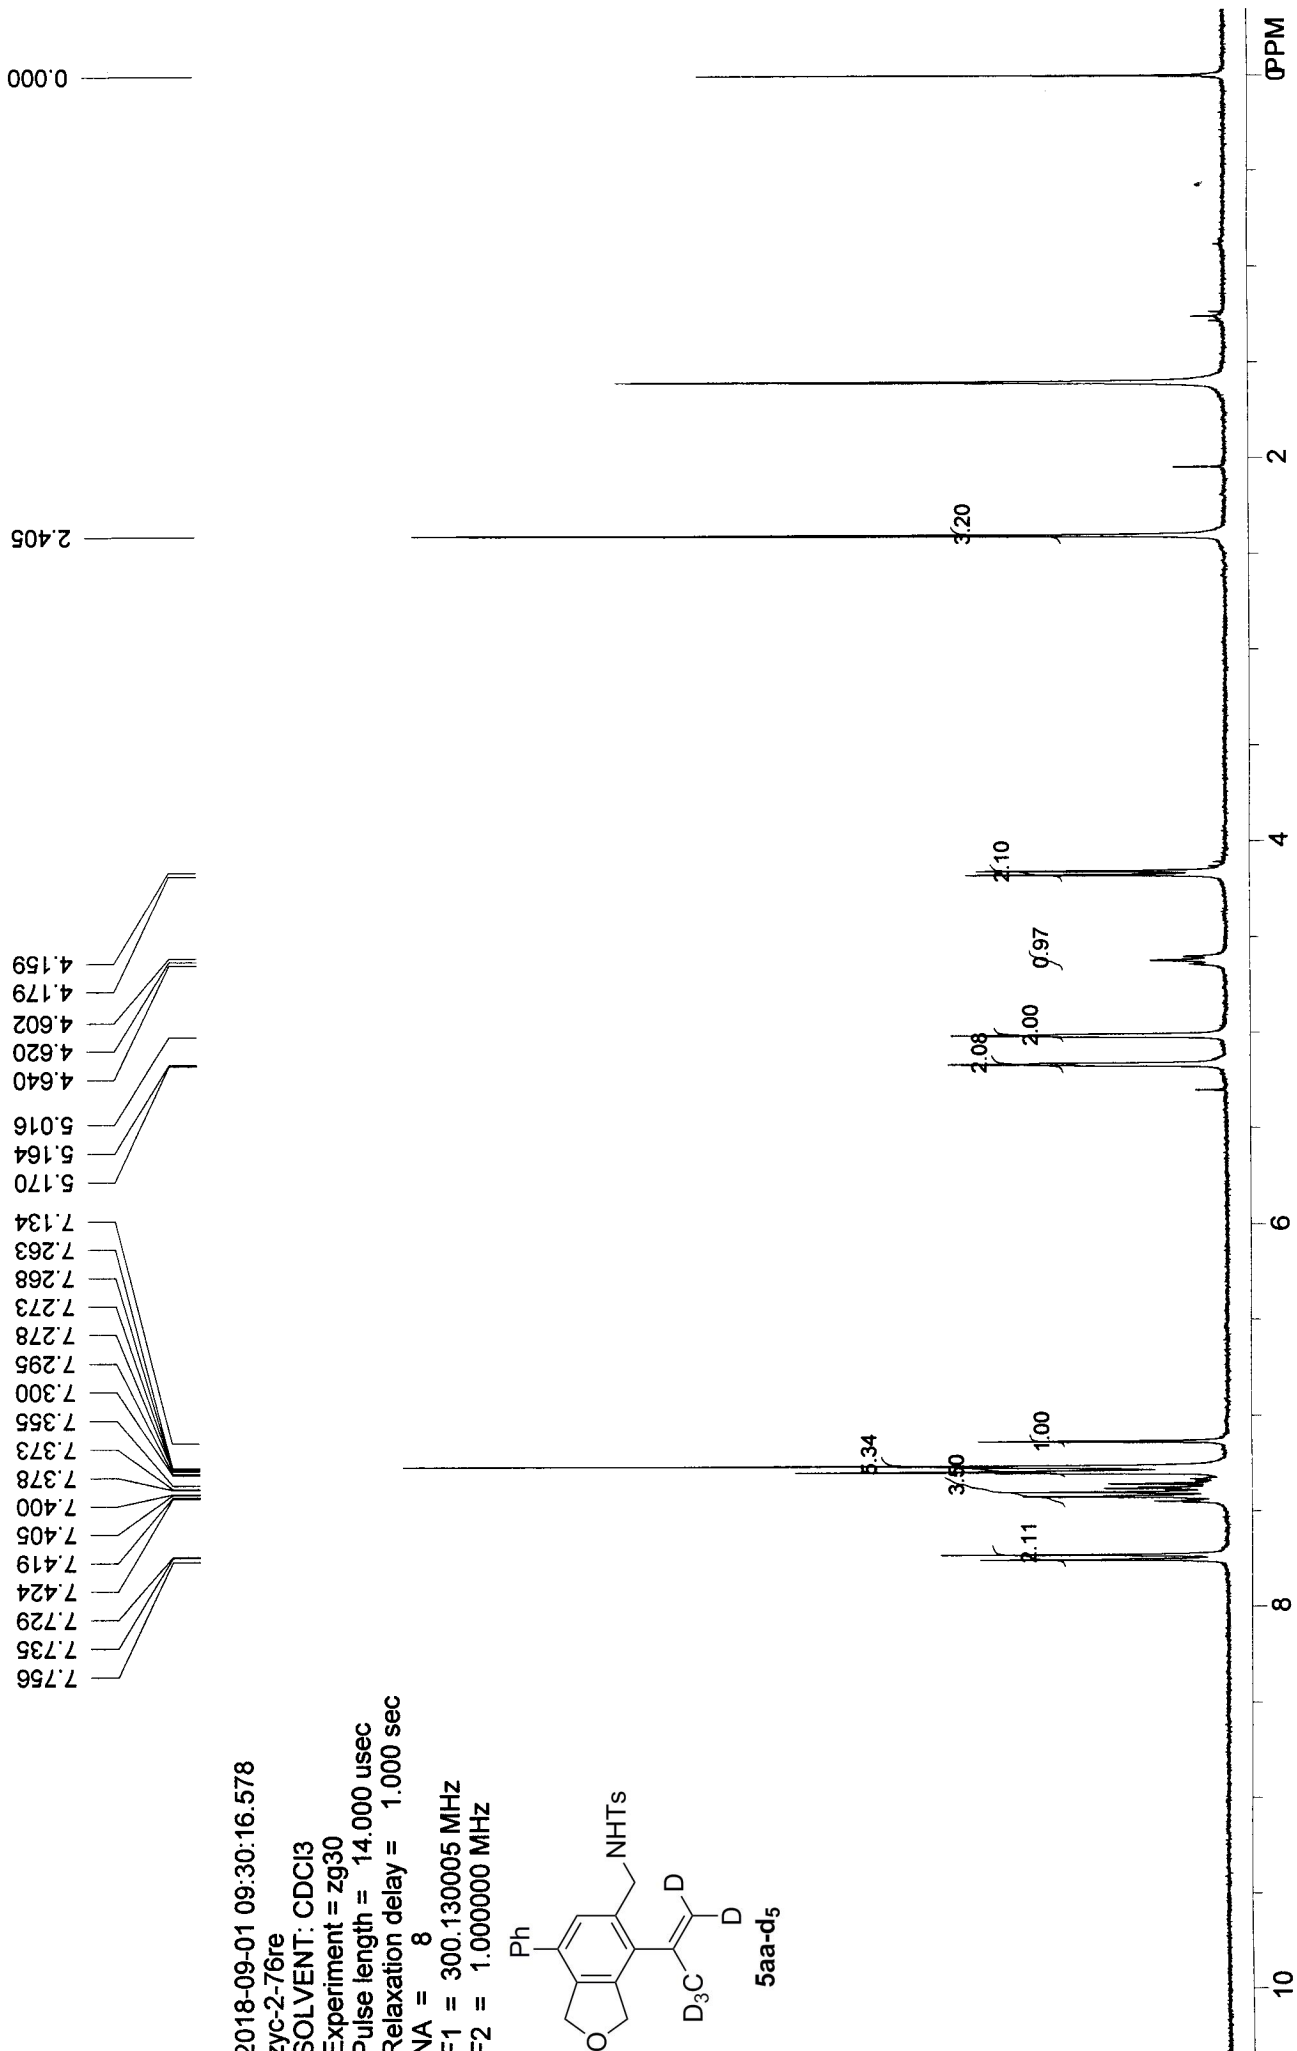

2018-11-22 22:19:10.437

zyc-3-35H

SOLVENT: CDCl<sub>3</sub>

Experiment = zg30

Pulse length = 14.000 usec

Relaxation delay = 1.000 sec

NA = 8

F1 = 300.130005 MHz

F2 = 1.000000 MHz

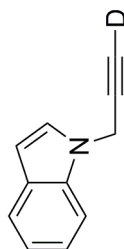

**D-4c**, 99% D

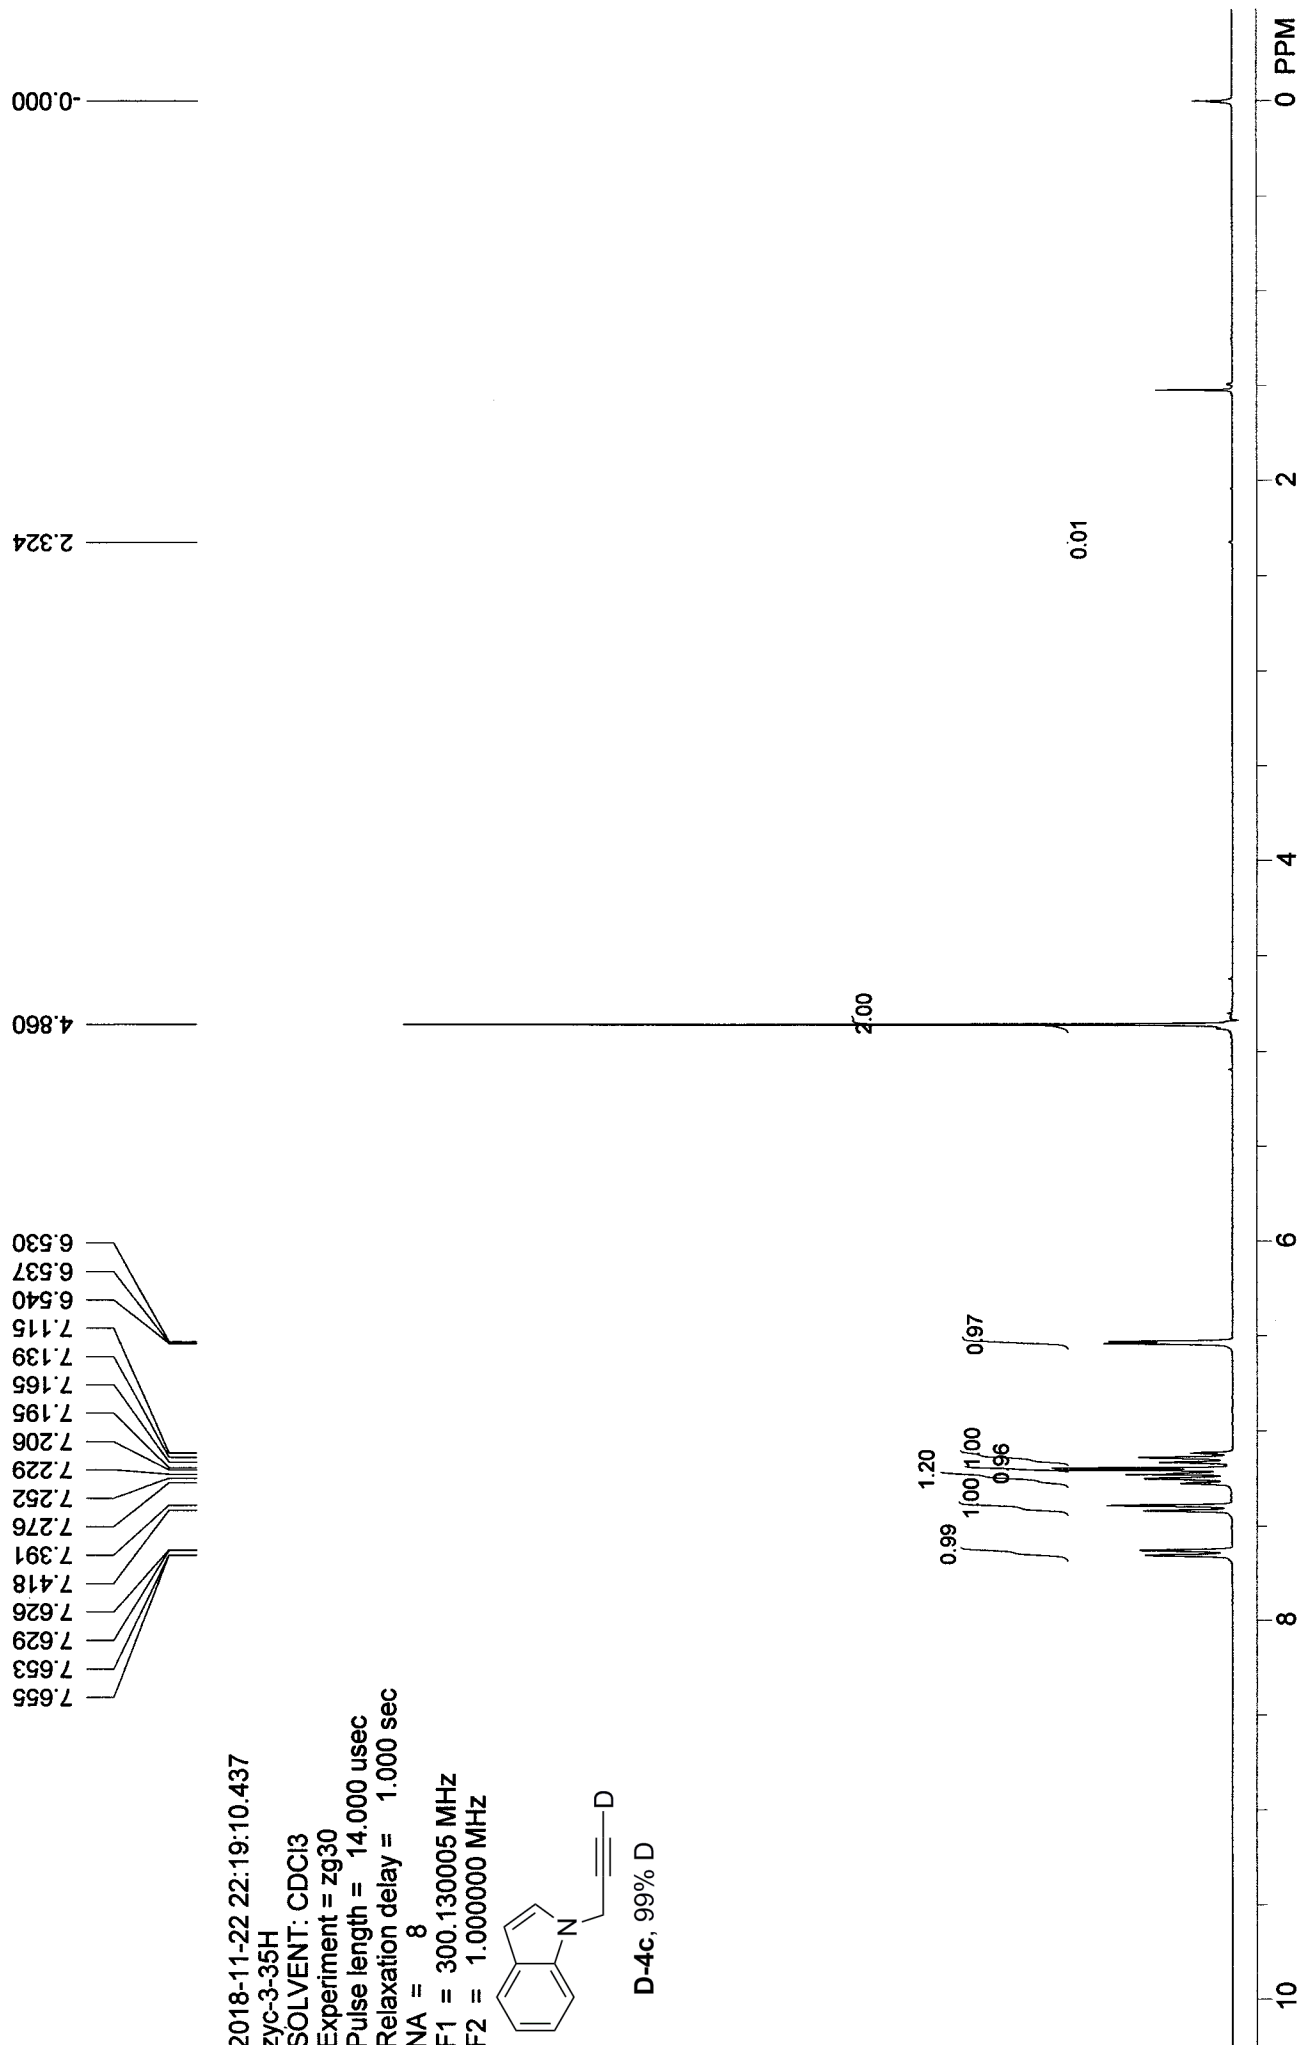

2018-11-23 07:56:24.046  
 zyc-3-35  
 SOLVENT: CDCl<sub>3</sub>  
 Experiment = zgpg30  
 Pulse length = 9.500 usec  
 Relaxation delay = 2.000 sec  
 NA = 9867  
 F1 = 75.467751 MHz  
 F2 = 1.000000 MHz

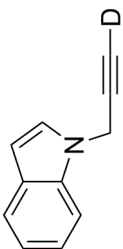

D-4c, 99% D

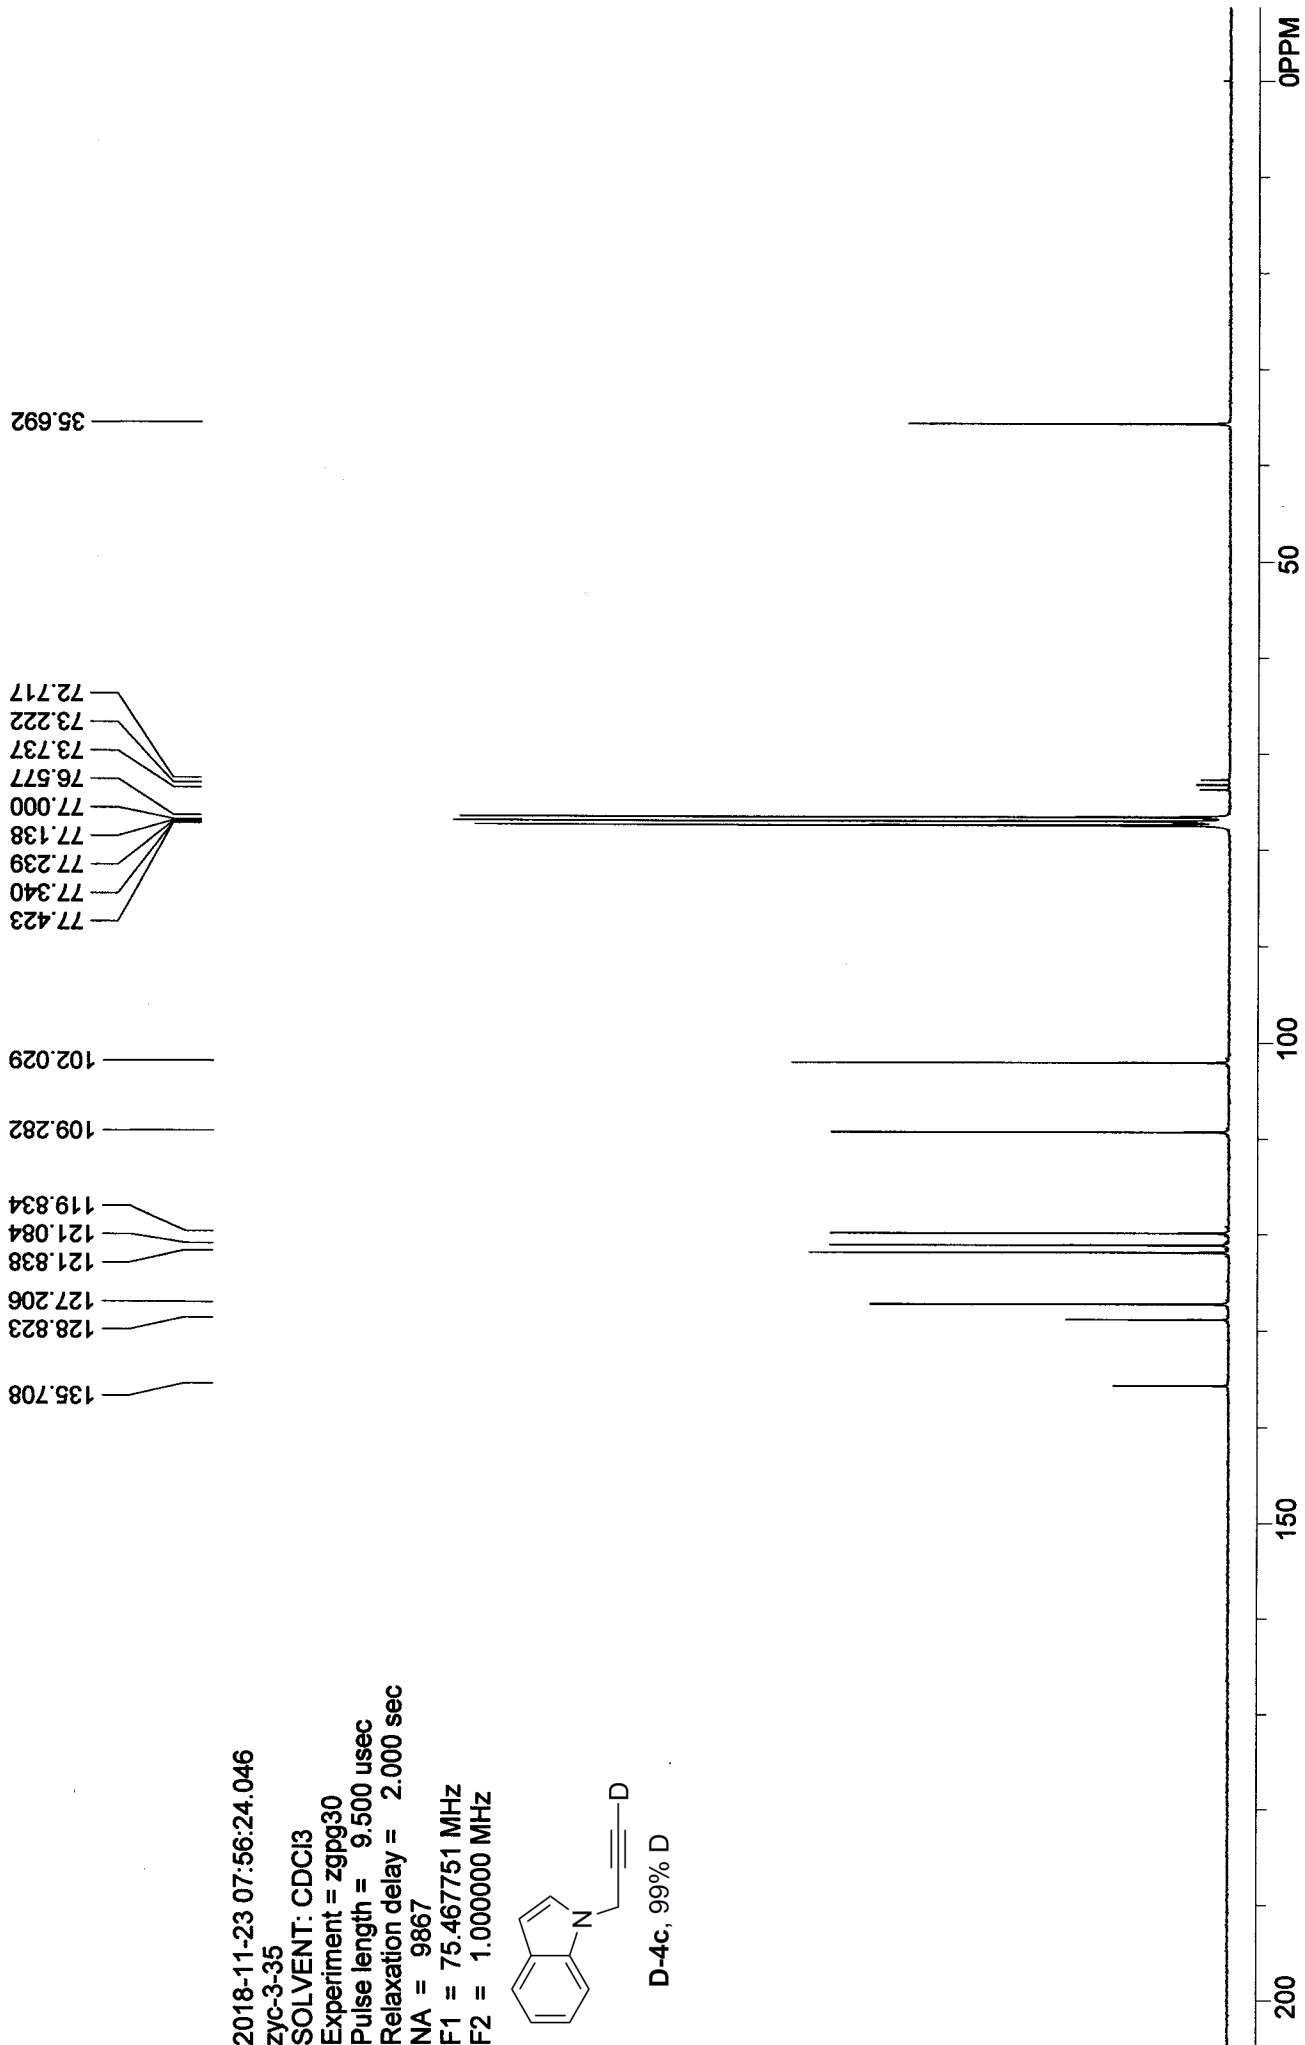

2018-11-24 13:15:56.671

**zyc-3-36H**

**SOLVENT: CDCl<sub>3</sub>**

## Experiment = zq30

Pulse length = 14.000  $\mu$ sec

Relaxation delay = 1.000 sec

8 = NA

**F1 = 300.130005 MHz**

**F2 = 1.000000 MHz**

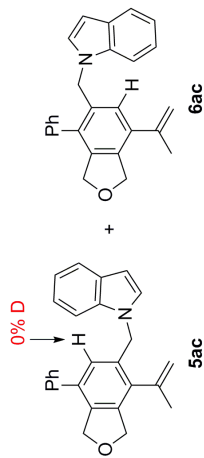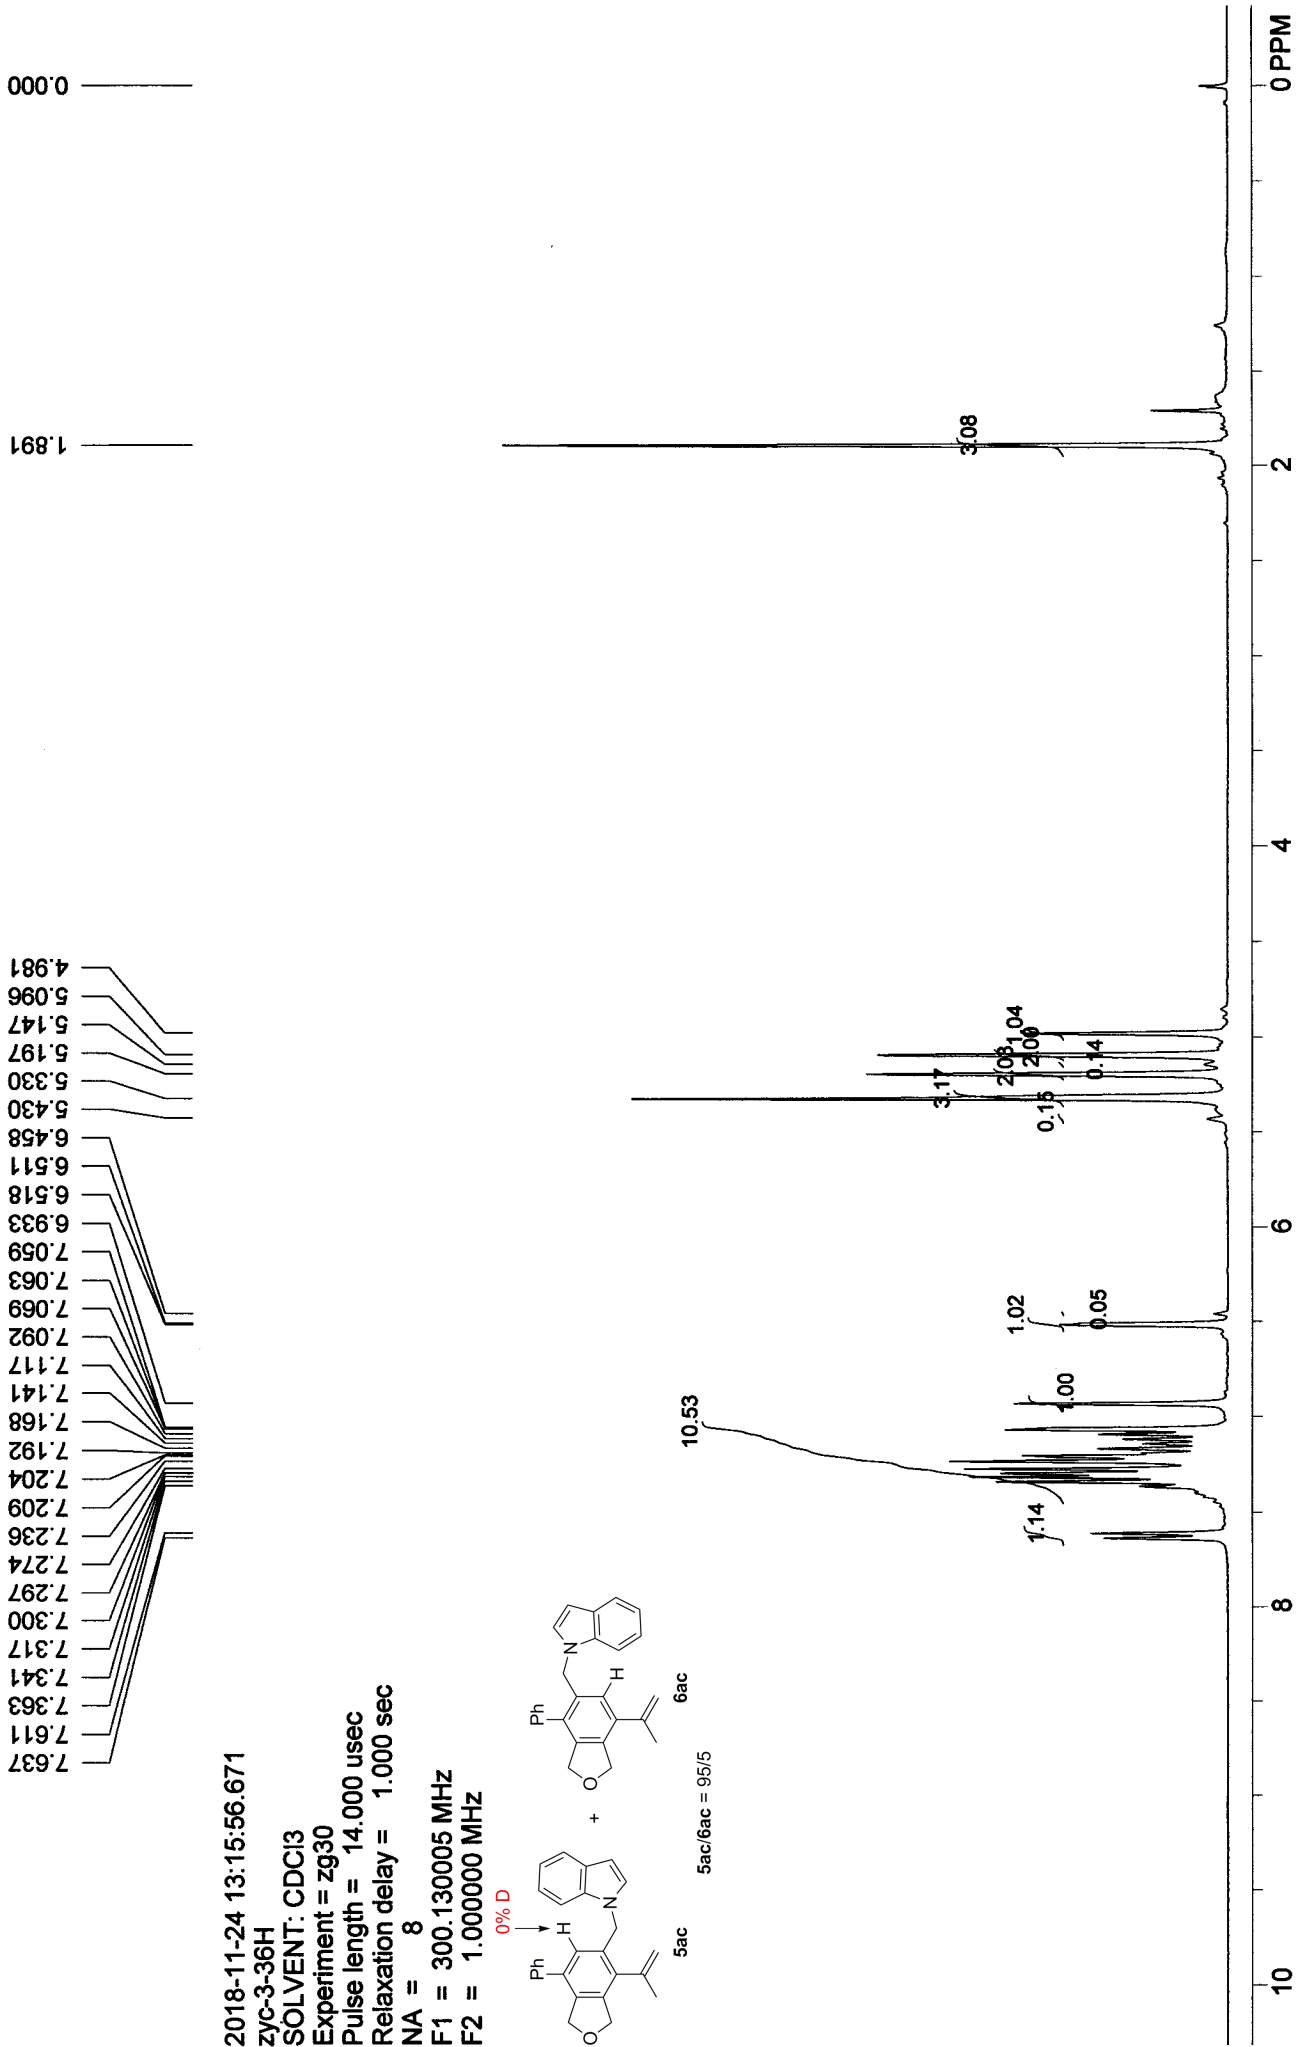

2018-11-24 13:36:12.406

zyc-3-36

SOLVENT: CDCl<sub>3</sub>

Experiment = zgpg30

Pulse length = 9.500 usec

Relaxation delay = 2.000 sec

NA = 302

F1 = 75.467751 MHz

F2 = 1.000000 MHz

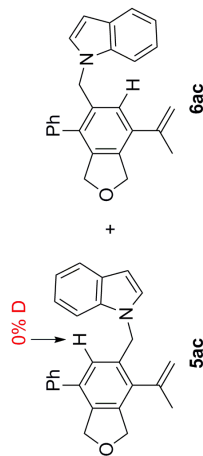

S124

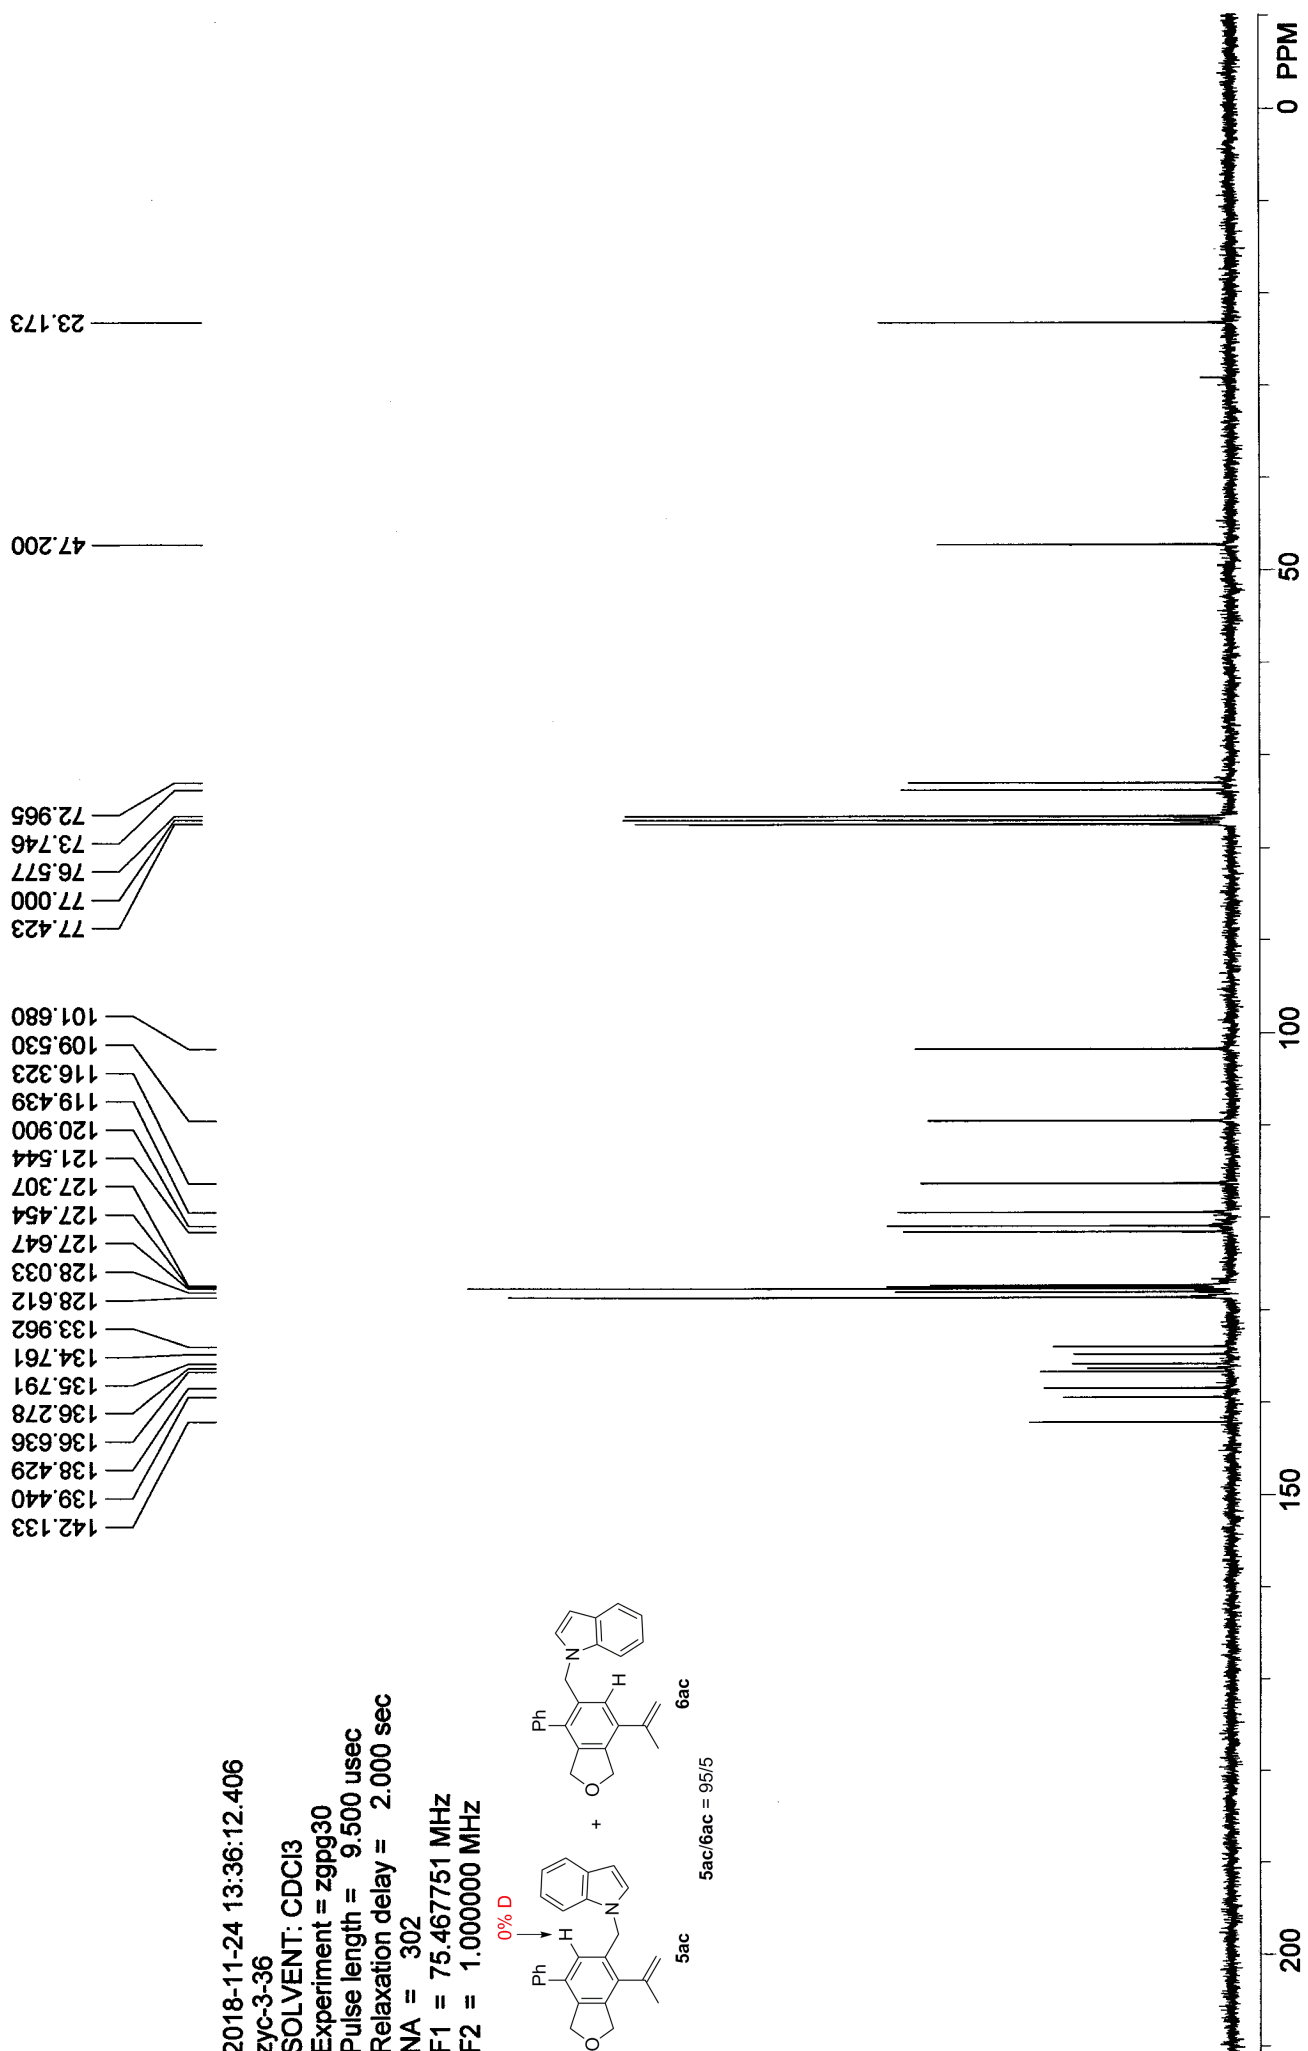



7.627  
7.601  
7.404  
7.385  
7.363  
7.345  
7.322  
7.297  
7.277  
7.265  
7.254  
7.224  
7.221  
7.198  
7.180  
7.159  
7.131  
7.107  
7.081  
7.055  
7.044  
6.925  
6.511  
6.501  
6.447  
5.417  
5.309  
5.294  
5.188  
5.135  
5.087  
4.968

2018-11-27 22:22:54.078

zyc-3-46

SOLVENT: CDCl<sub>3</sub>

Experiment = zg30

Pulse length = 14.000 usec

Relaxation delay = 1.000 sec

NA = 8

F1 = 300.130005 MHz

F2 = 1.000000 MHz

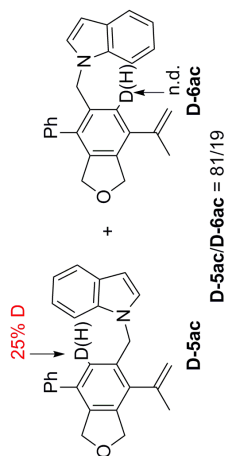

S125

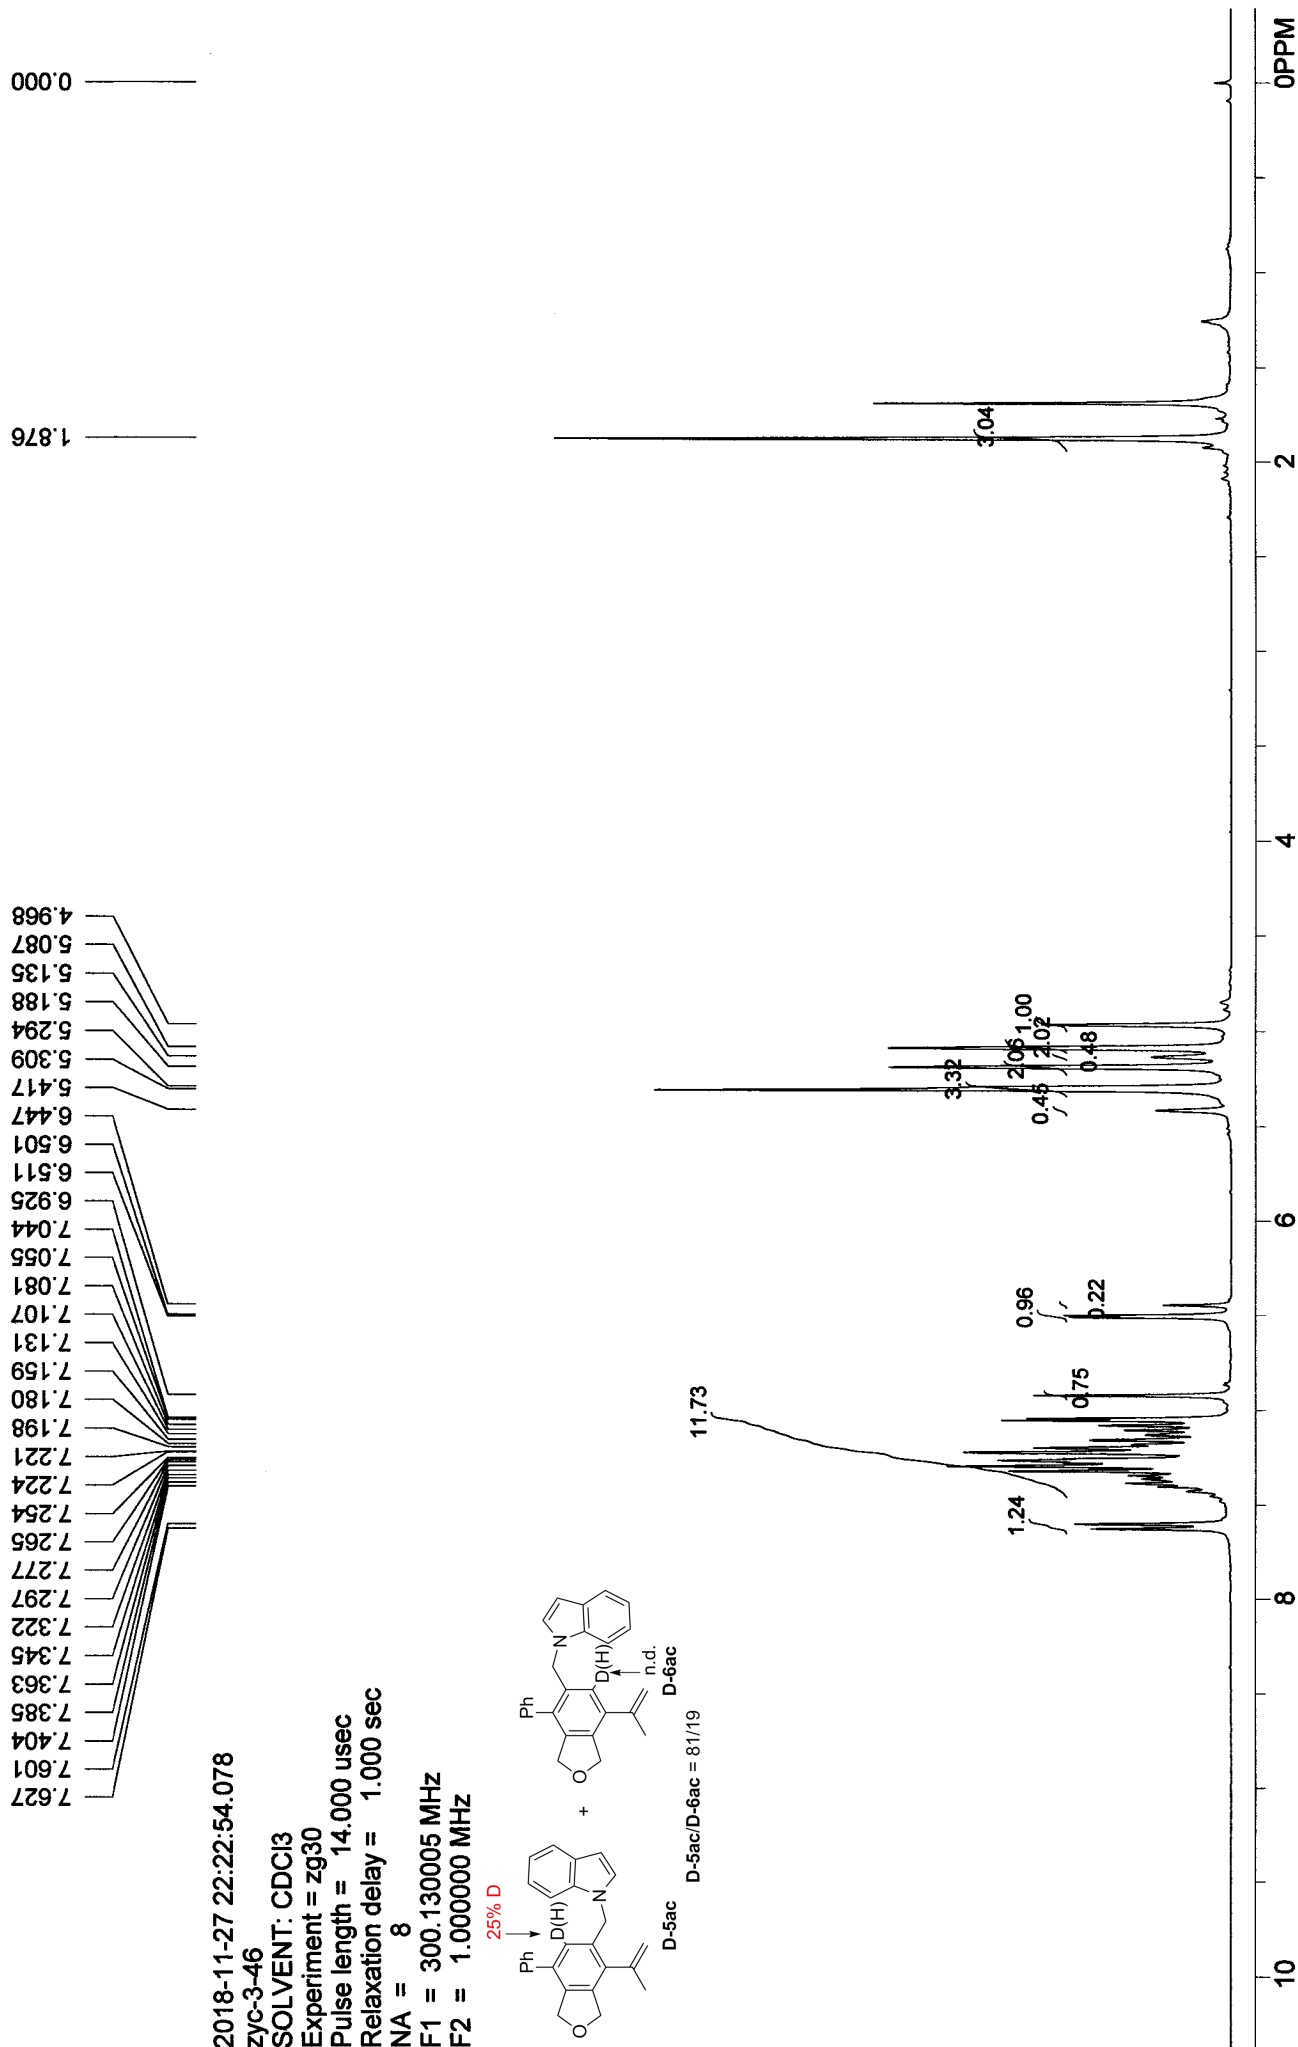

145.166  
142.115  
139.422  
138.420  
137.850  
136.967  
136.636  
136.269  
135.772  
135.570  
135.488  
134.743  
134.660  
134.100  
133.943  
133.870  
131.333  
128.584  
128.391  
128.005  
127.803  
127.619  
127.426  
127.298  
126.627  
121.525  
120.882  
120.689  
120.247  
119.779  
119.420  
116.286  
109.511  
108.620  
101.671  
95.264  
77.423  
77.000  
76.568  
74.077  
73.709  
72.928  
72.395  
47.173  
44.617  
29.083  
23.136

2018-11-28 08:44:56.375

zyc-3-46

SOLVENT: CDCl<sub>3</sub>

Experiment = zgpg30

Pulse length = 9.500 usec

Relaxation delay = 2.000 sec

NA = 10627

F1 = 75.467751 MHz

F2 = 1.000000 MHz

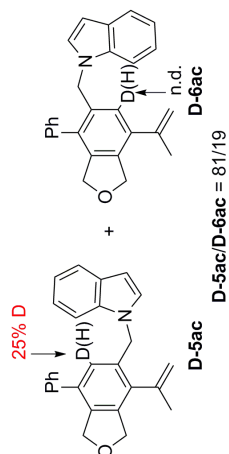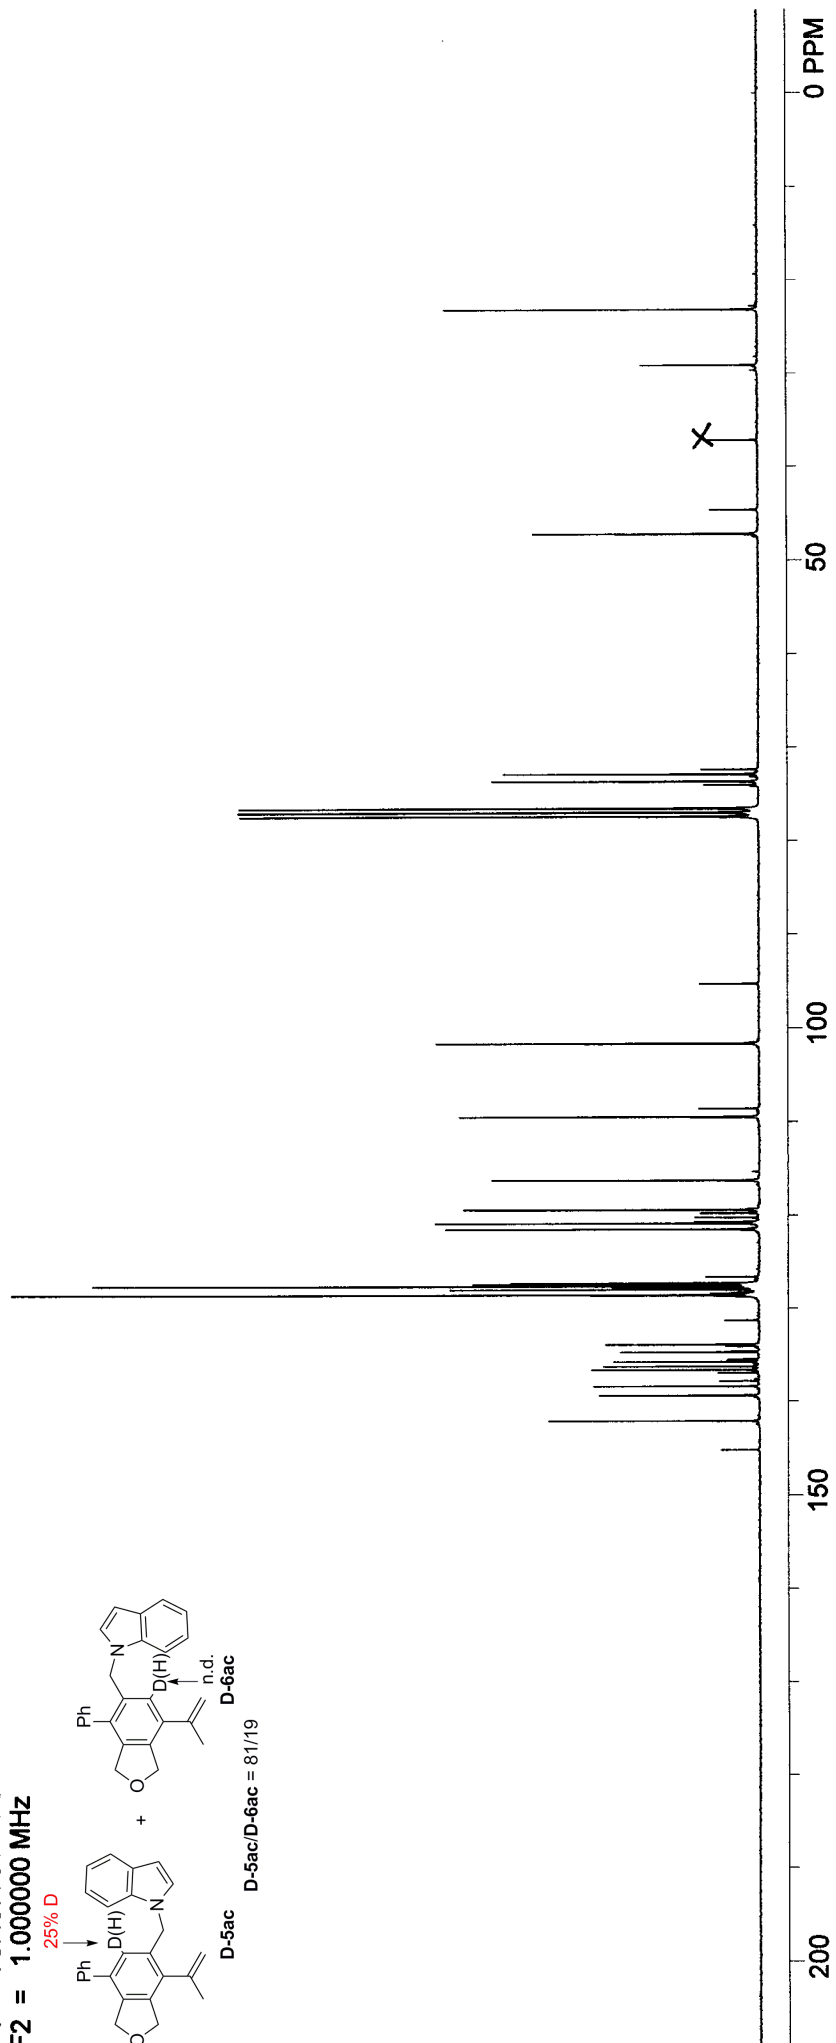

-0.000

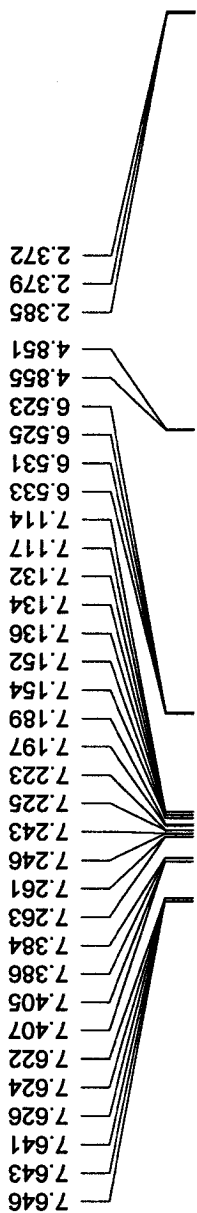

2018-11-29 19:33:21.601  
zyc-3-48H  
SOLVENT: CDCl3  
Experiment = zg30  
Pulse length = 15.000 usec  
Relaxation delay = 1.000 sec  
NA = 16  
F1 = 400.130035 MHz  
F2 = 1.000000 MHz

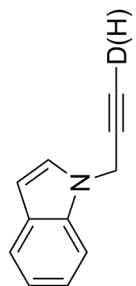

D-4c', 60% D

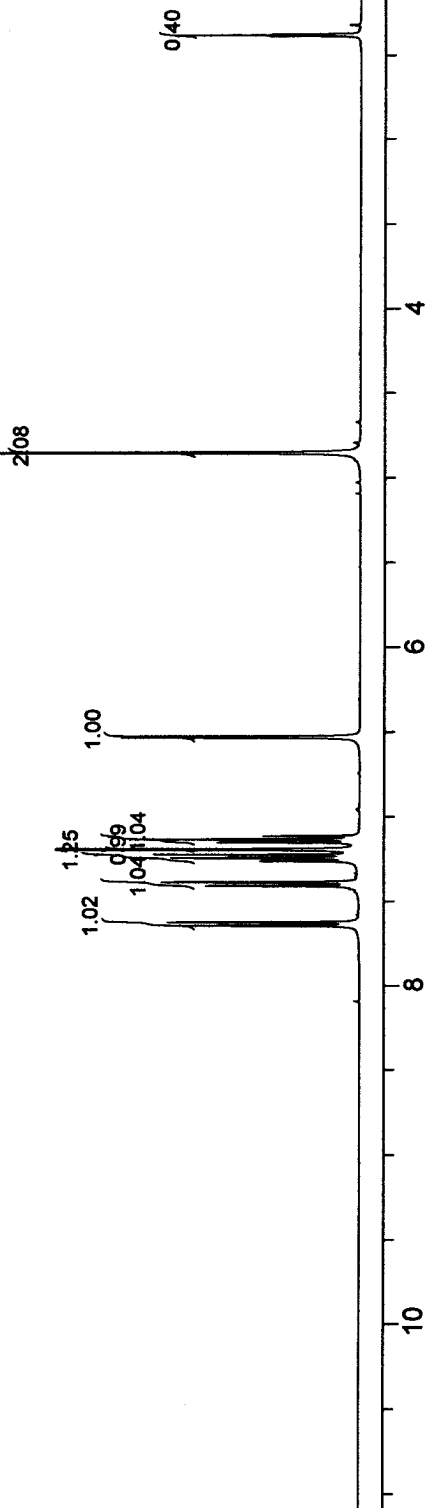

PPM

0

2

4

6

8

10

2018-12-03 00:13:58.759  
 zyc-3-48C  
 SOLVENT: CDCl3  
 Experiment = zgpg30  
 Pulse length = 10.000 usec  
 Relaxation delay = 1.500 sec  
 NA = 512  
 F1 = 100.612770 MHz  
 F2 = 1.000000 MHz

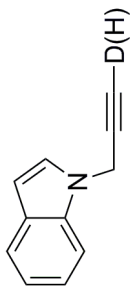

D-4c', 60% D

S128

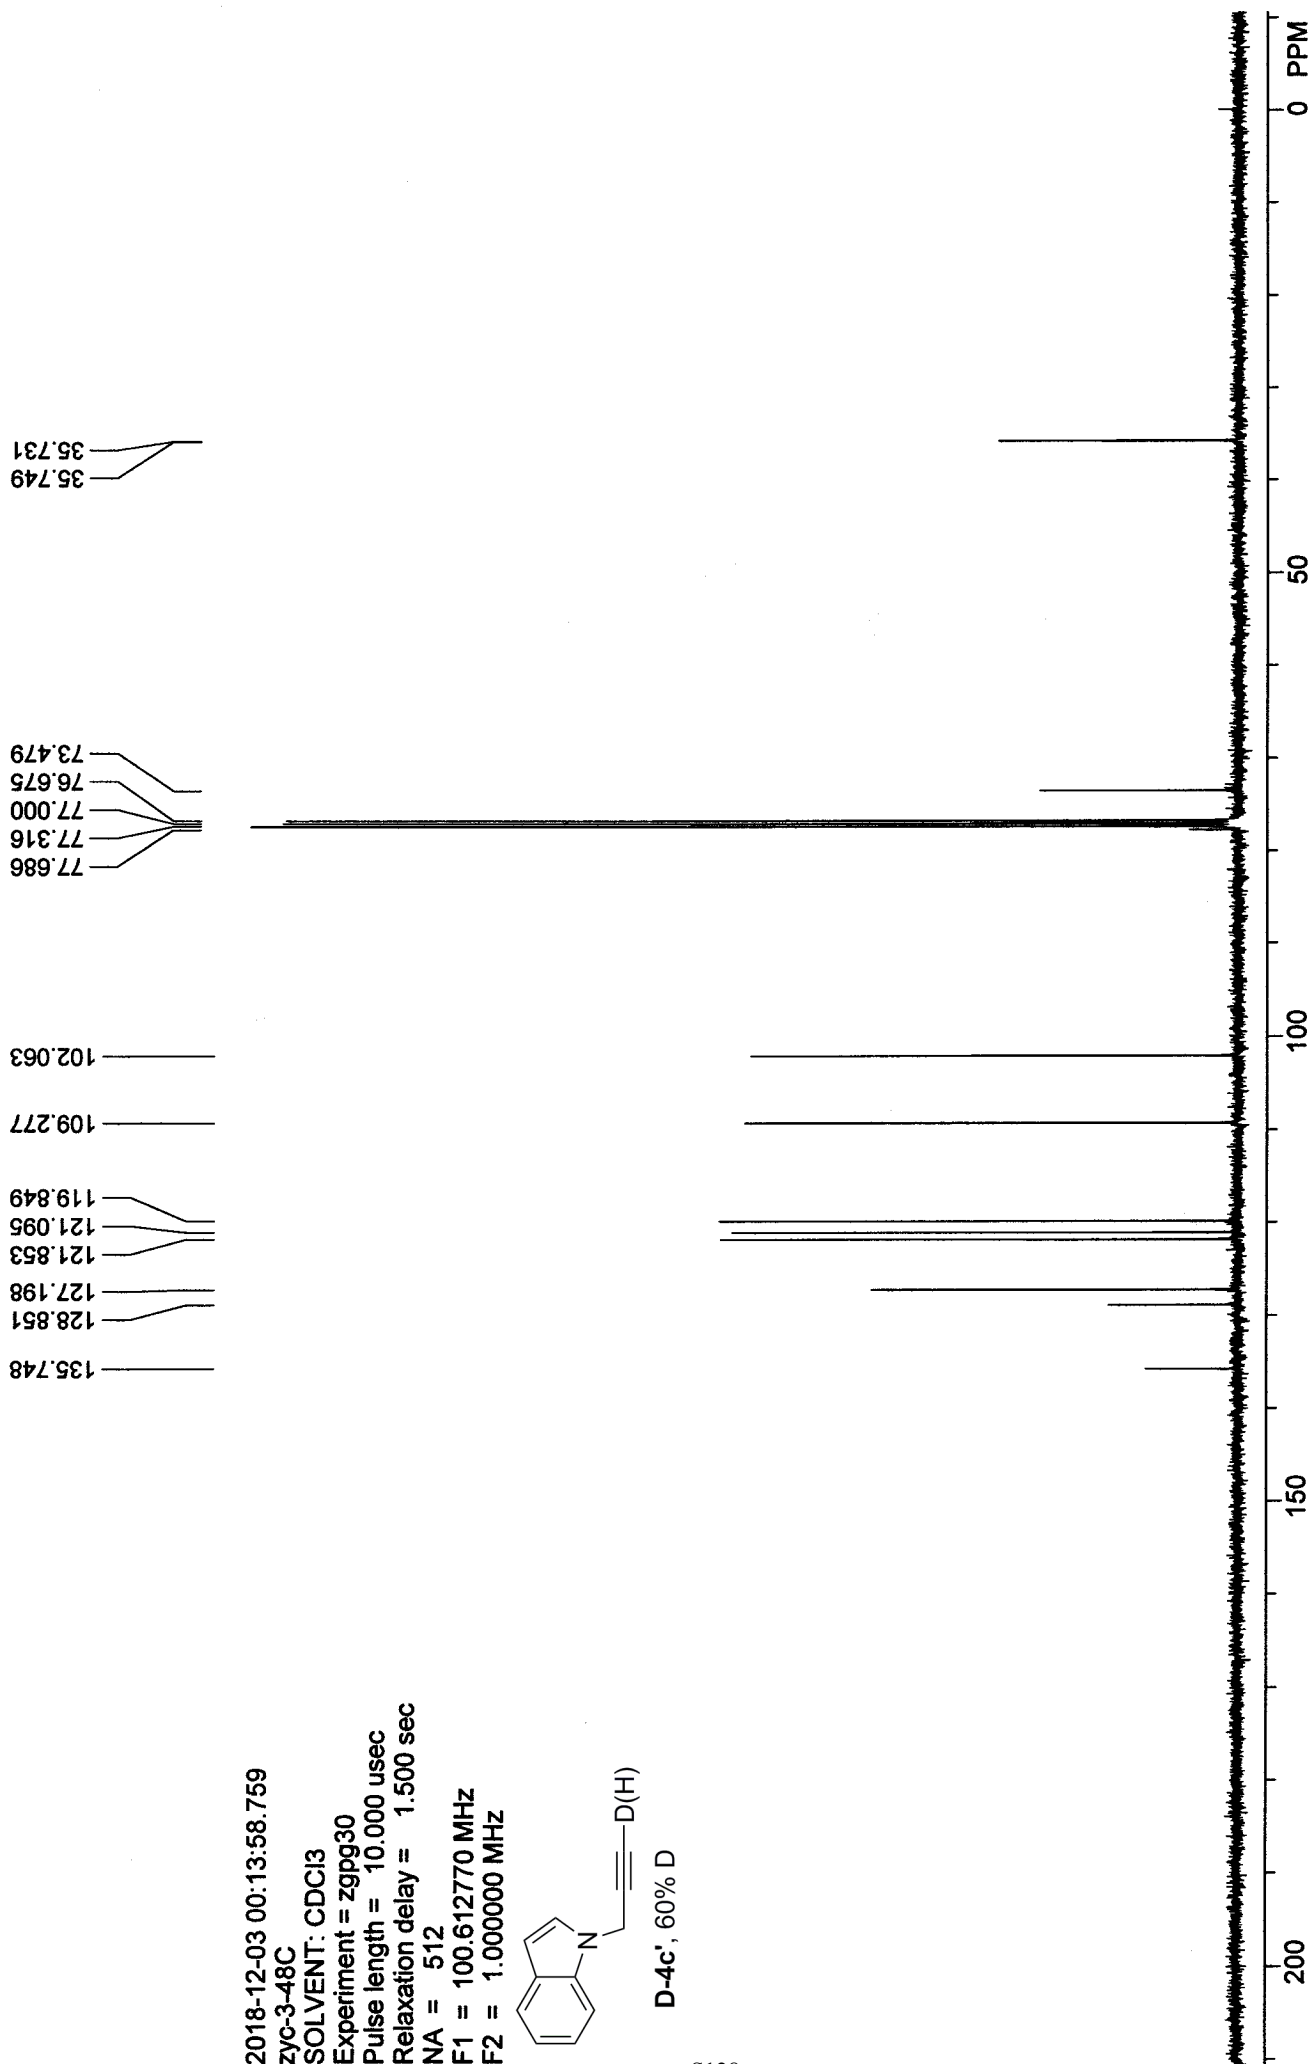

7.638  
7.612  
7.402  
7.376  
7.370  
7.347  
7.342  
7.323  
7.303  
7.280  
7.277  
7.239  
7.234  
7.224  
7.212  
7.193  
7.190  
7.167  
7.144  
7.139  
7.119  
7.116  
7.093  
7.073  
7.063  
6.933  
6.521  
6.512  
6.511  
6.463  
5.437  
5.335  
5.325  
5.319  
5.314  
5.199  
5.148  
5.097  
4.986  
4.984  
1.897  
1.627

2018-11-26 22:28:43.109

zyc-3-41H

SOLVENT: CDCI3

Experiment = zg30

Pulse length = 14.000 usec

Relaxation delay = 1.000 sec

NA = 8

F1 = 300.130005 MHz

F2 = 1.000000 MHz

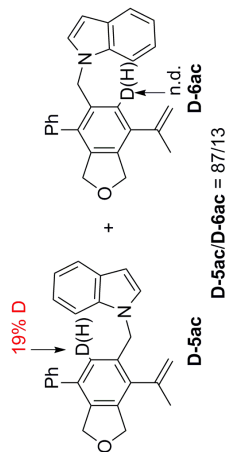

9.89

0.81

1.15

1.16

0.97

0.14

0.30

0.30

0.30

0.30

0.30

0.30

0.30

0.30

0.30

0.30

0.30

0.30

0.30

PPM

10

8

6

4

2

0.000

145.237  
142.158  
139.474  
138.472  
137.911  
137.029  
136.679  
136.321  
135.824  
135.631  
135.530  
134.804  
134.721  
134.179  
133.977  
133.912  
128.710  
128.636  
128.048  
127.855  
127.671  
127.478  
127.350  
126.679  
121.577  
120.924  
120.741  
120.290  
119.821  
119.463  
116.347  
109.545  
108.644  
101.714  
95.307  
77.429  
77.006  
76.583  
74.138  
73.770  
72.989  
72.447  
72.234  
47.234  
44.688  
29.144  
23.197

2018-11-27 08:51:22.578

zyc-3-41

SOLVENT: CDCl3

Experiment = zgpg30

Pulse length = 9.500 usec

Relaxation delay = 2.000 sec

NA = 10000

F1 = 75.467751 MHz

F2 = 1.000000 MHz

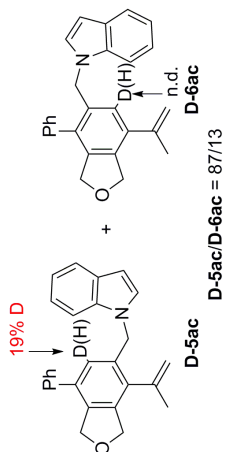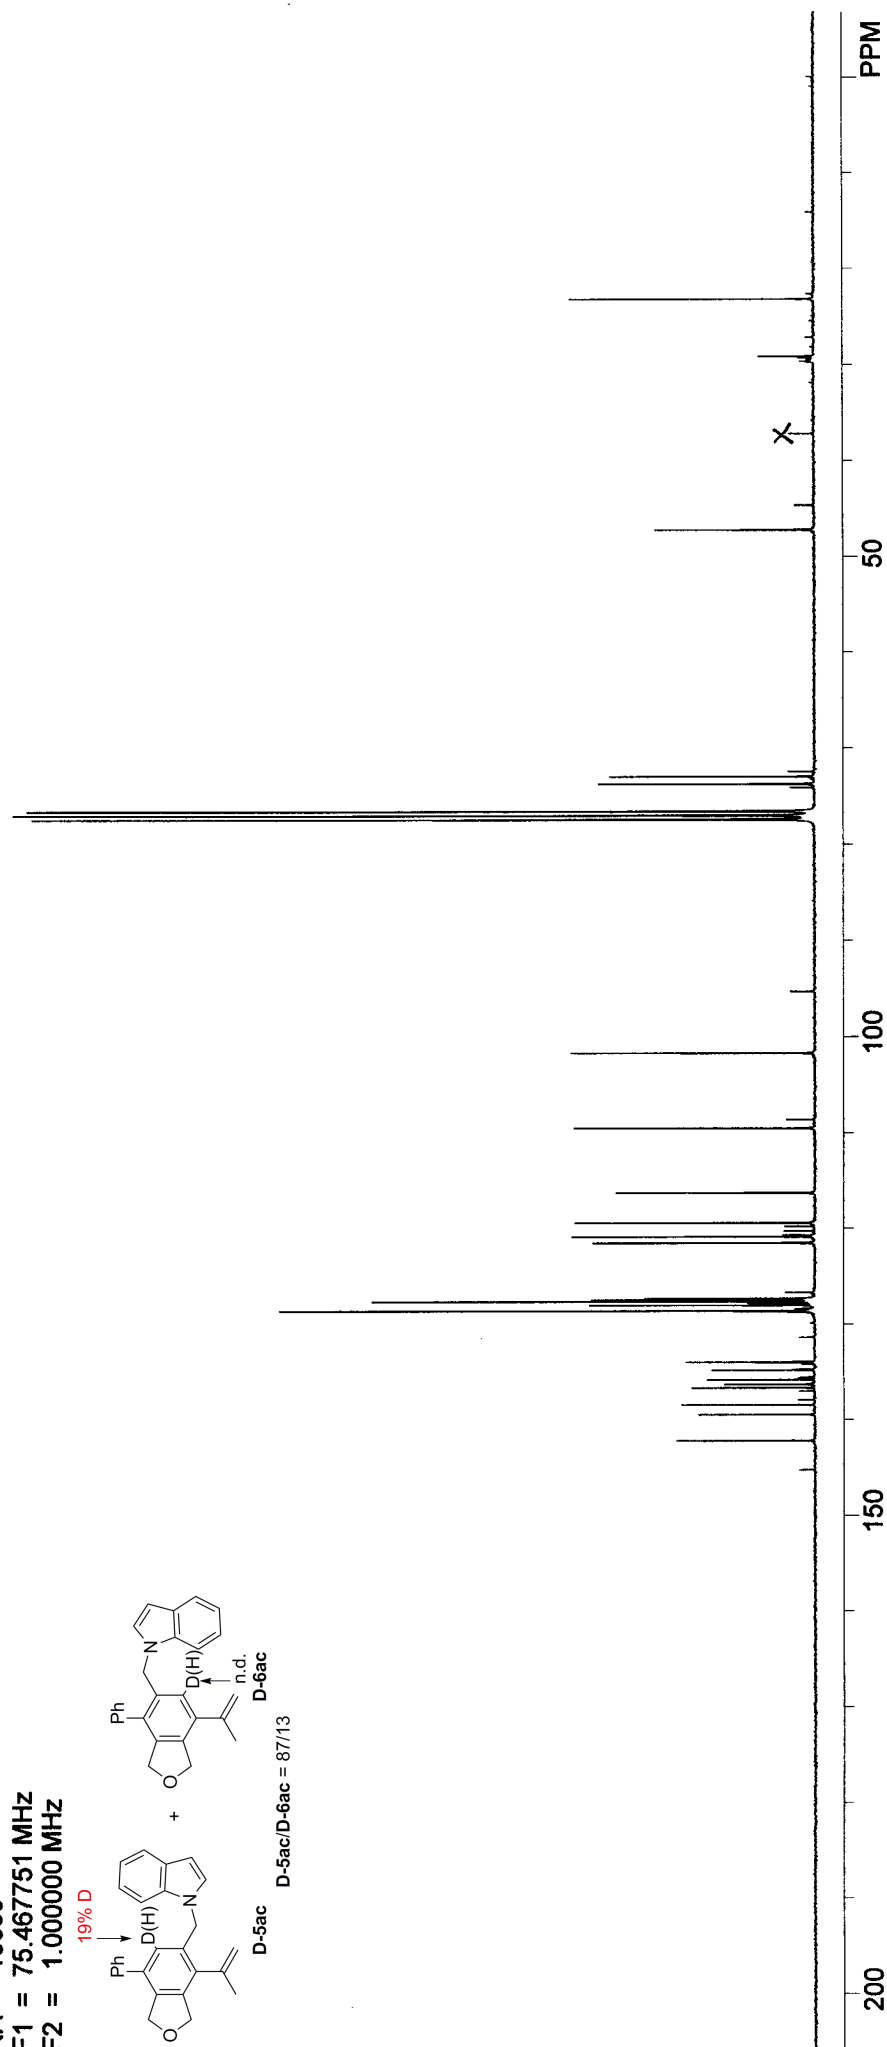

-0.000

1.947  
2.394  
3.808  
3.830  
4.444  
4.831  
4.976  
4.980  
5.022  
5.026  
5.048  
5.055  
5.207  
5.235  
5.240  
5.245  
5.481  
5.502  
5.515  
5.523  
5.536  
5.558  
5.571  
5.579  
5.592  
5.614

7.273  
7.299  
7.314  
7.320  
7.320  
7.339  
7.358  
7.363  
7.392  
7.392  
7.411  
7.417  
7.732  
7.760

2018-03-15 10:37:13.968

zyc-1-148H

SOLVENT: CDCl3

Experiment = zg30

Pulse length = 14.000 usec

Relaxation delay = 1.000 sec

NA = 8

F1 = 300.130005 MHz

F2 = 1.000000 MHz

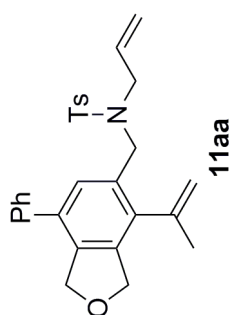

8/17

4.00

1.05

1.03

2.00

2.10

3.08

3.28

2.07

PPM

10

8

6

4

2

2018-03-15 10:44:53.828

zyc-1-148C

SOLVENT: CDCl<sub>3</sub>

Experiment = zgpg30

Pulse length = 9.500 usec

Relaxation delay = 2.000 sec

NA = 103

F1 = 75.467751 MHz

F2 = 1.000000 MHz

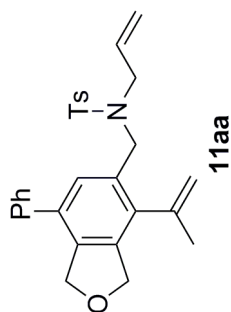

S132

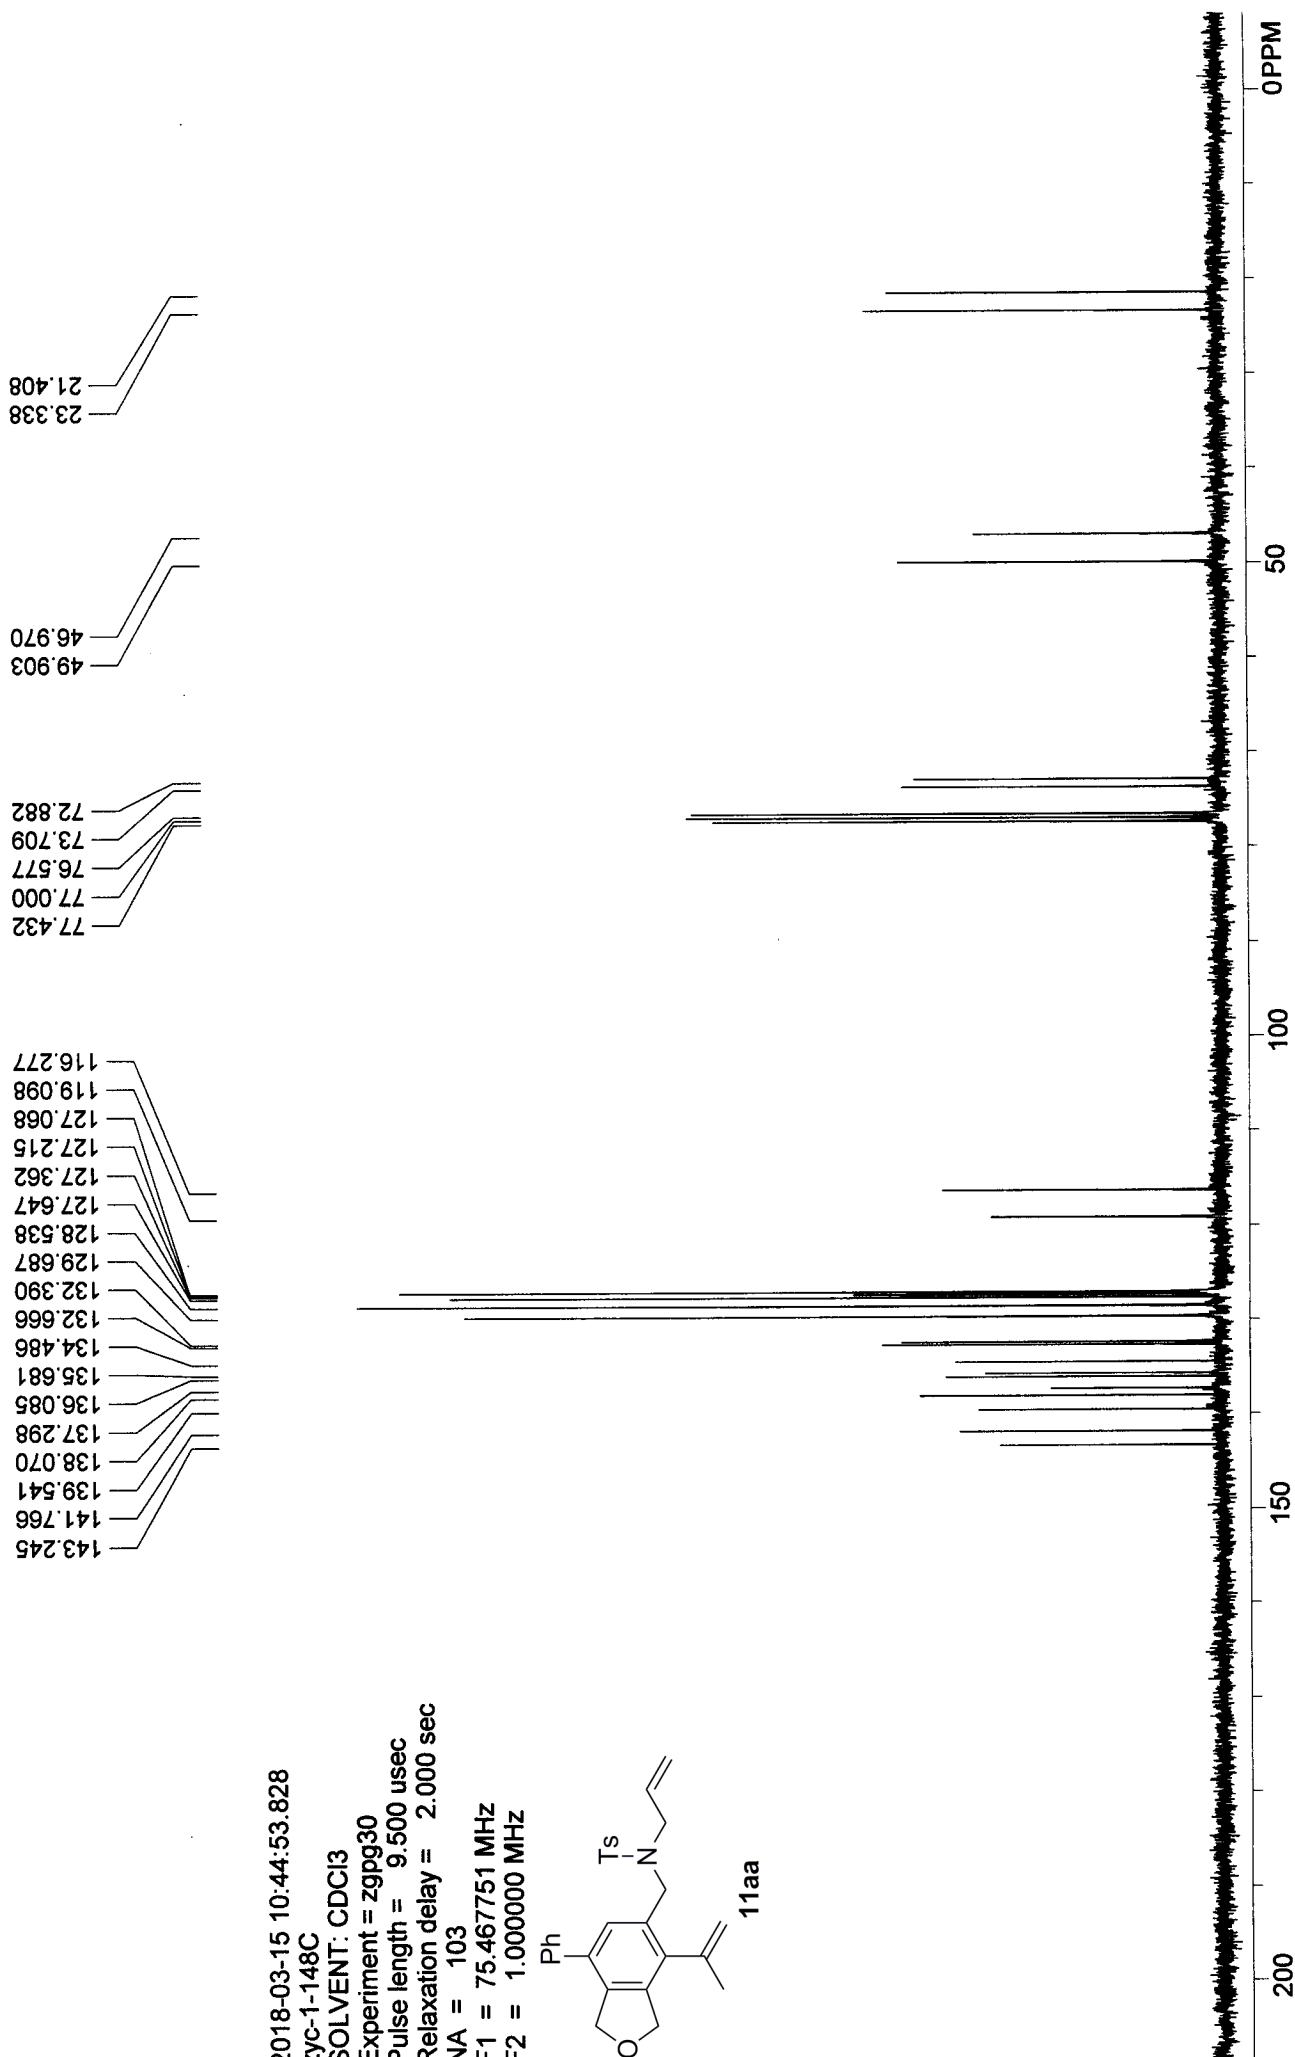



2018-03-26 19:15:41.015

zyc-1-164H

SOLVENT: CDCl<sub>3</sub>

Experiment = zg30

Pulse length = 14.000 usec

Relaxation delay = 1.000 sec

NA = 8

F1 = 300.130005 MHz

F2 = 1.000000 MHz

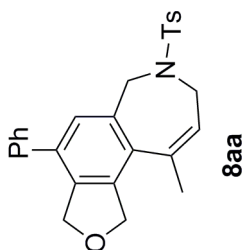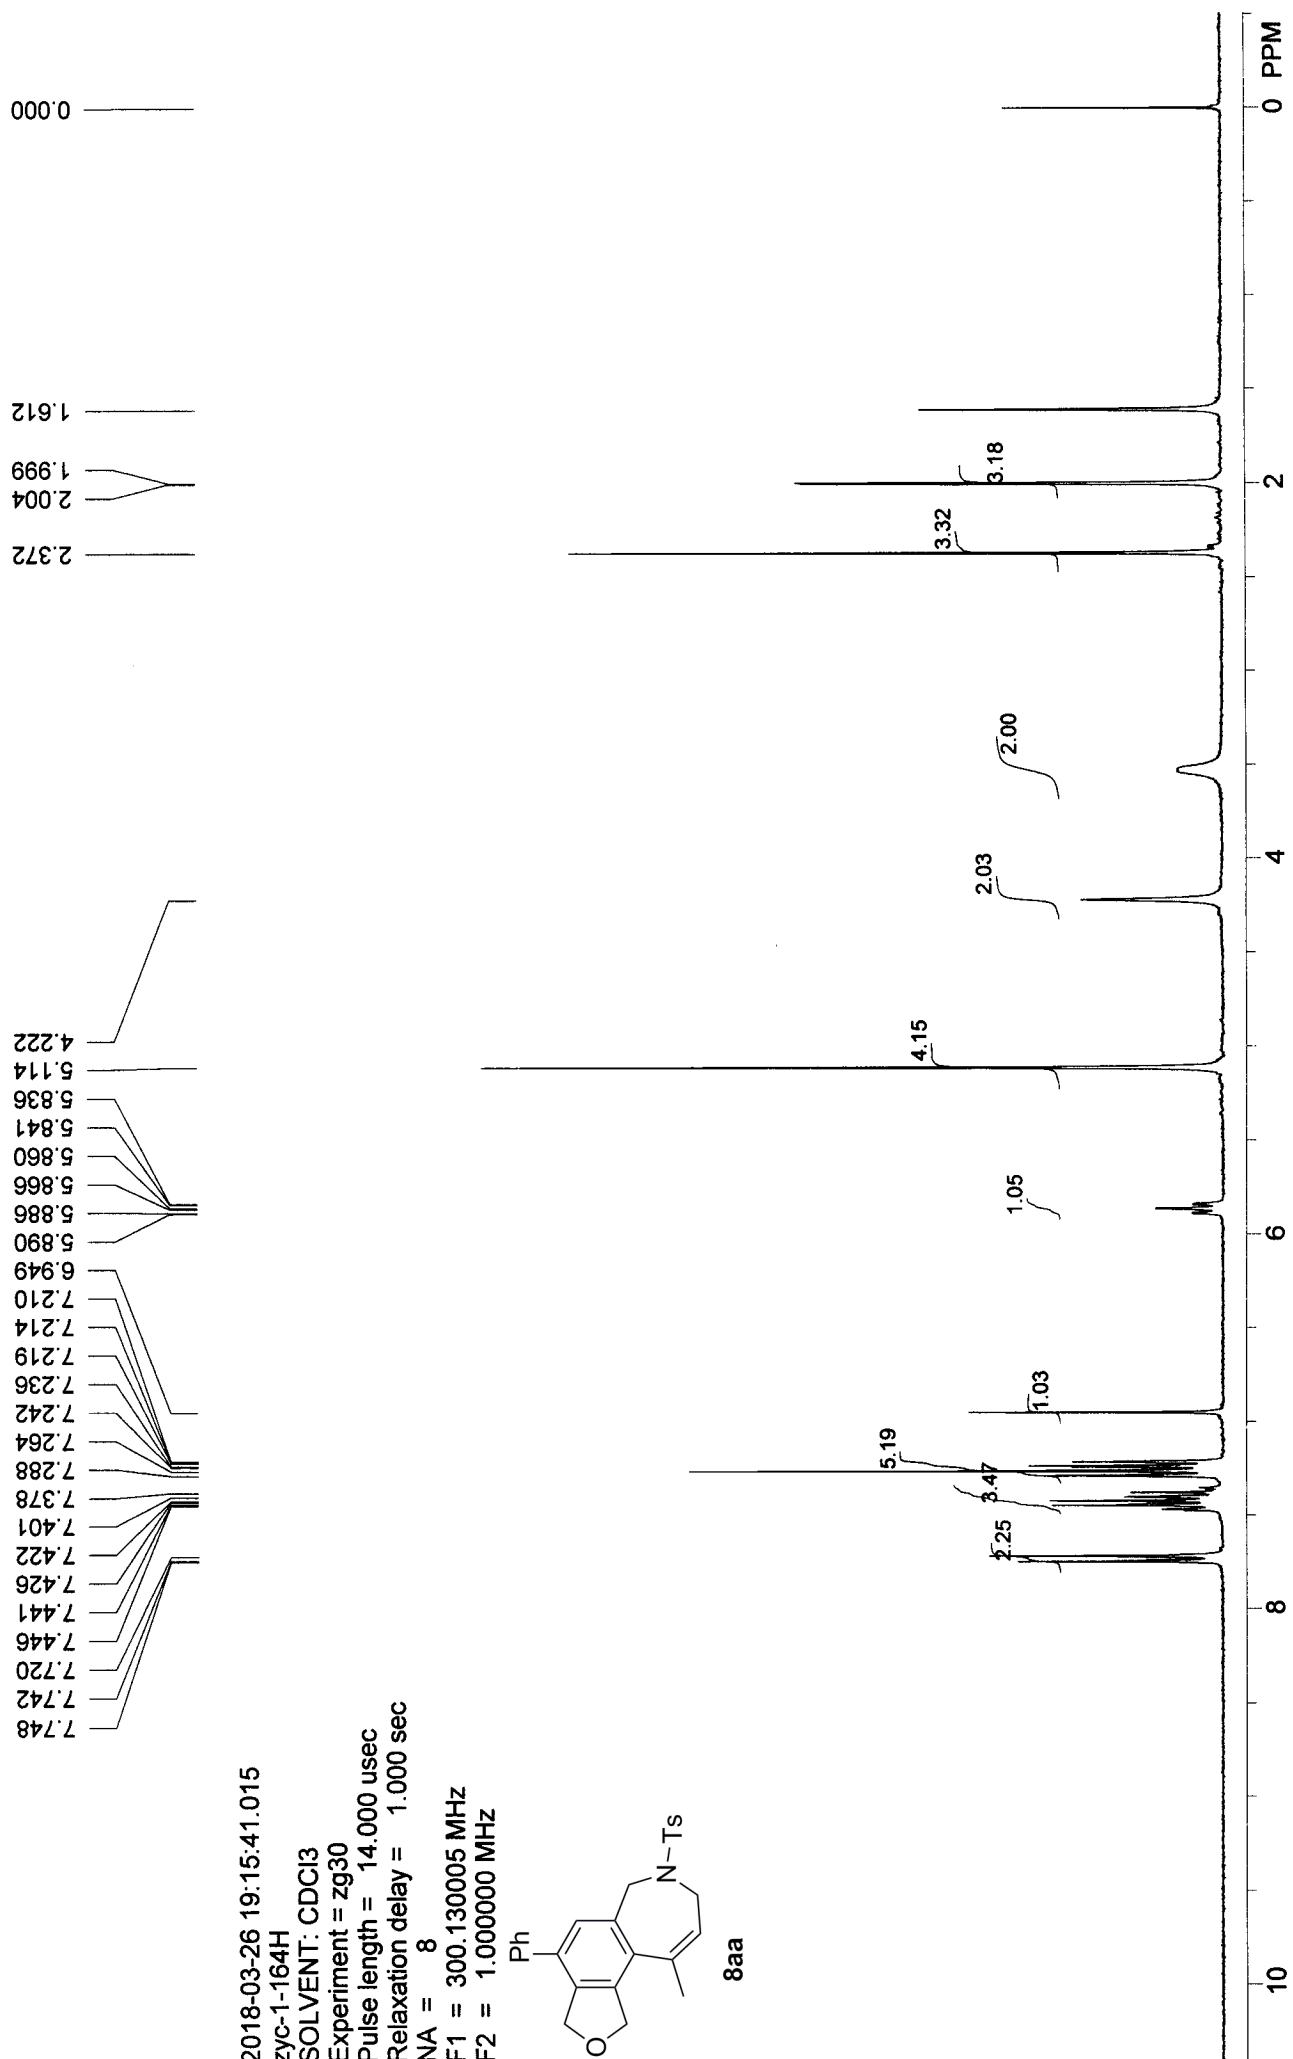

2018-03-26 19:29:01.671  
 zyc-1-164C  
 SOLVENT: CDCl3  
 Experiment = zgpg30  
 Pulse length = 9.500 usec  
 Relaxation delay = 2.000 sec  
 NA = 203  
 F1 = 75.467751 MHz  
 F2 = 1.000000 MHz

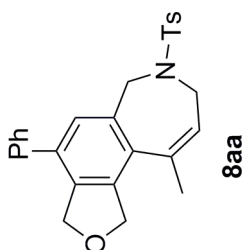

S134

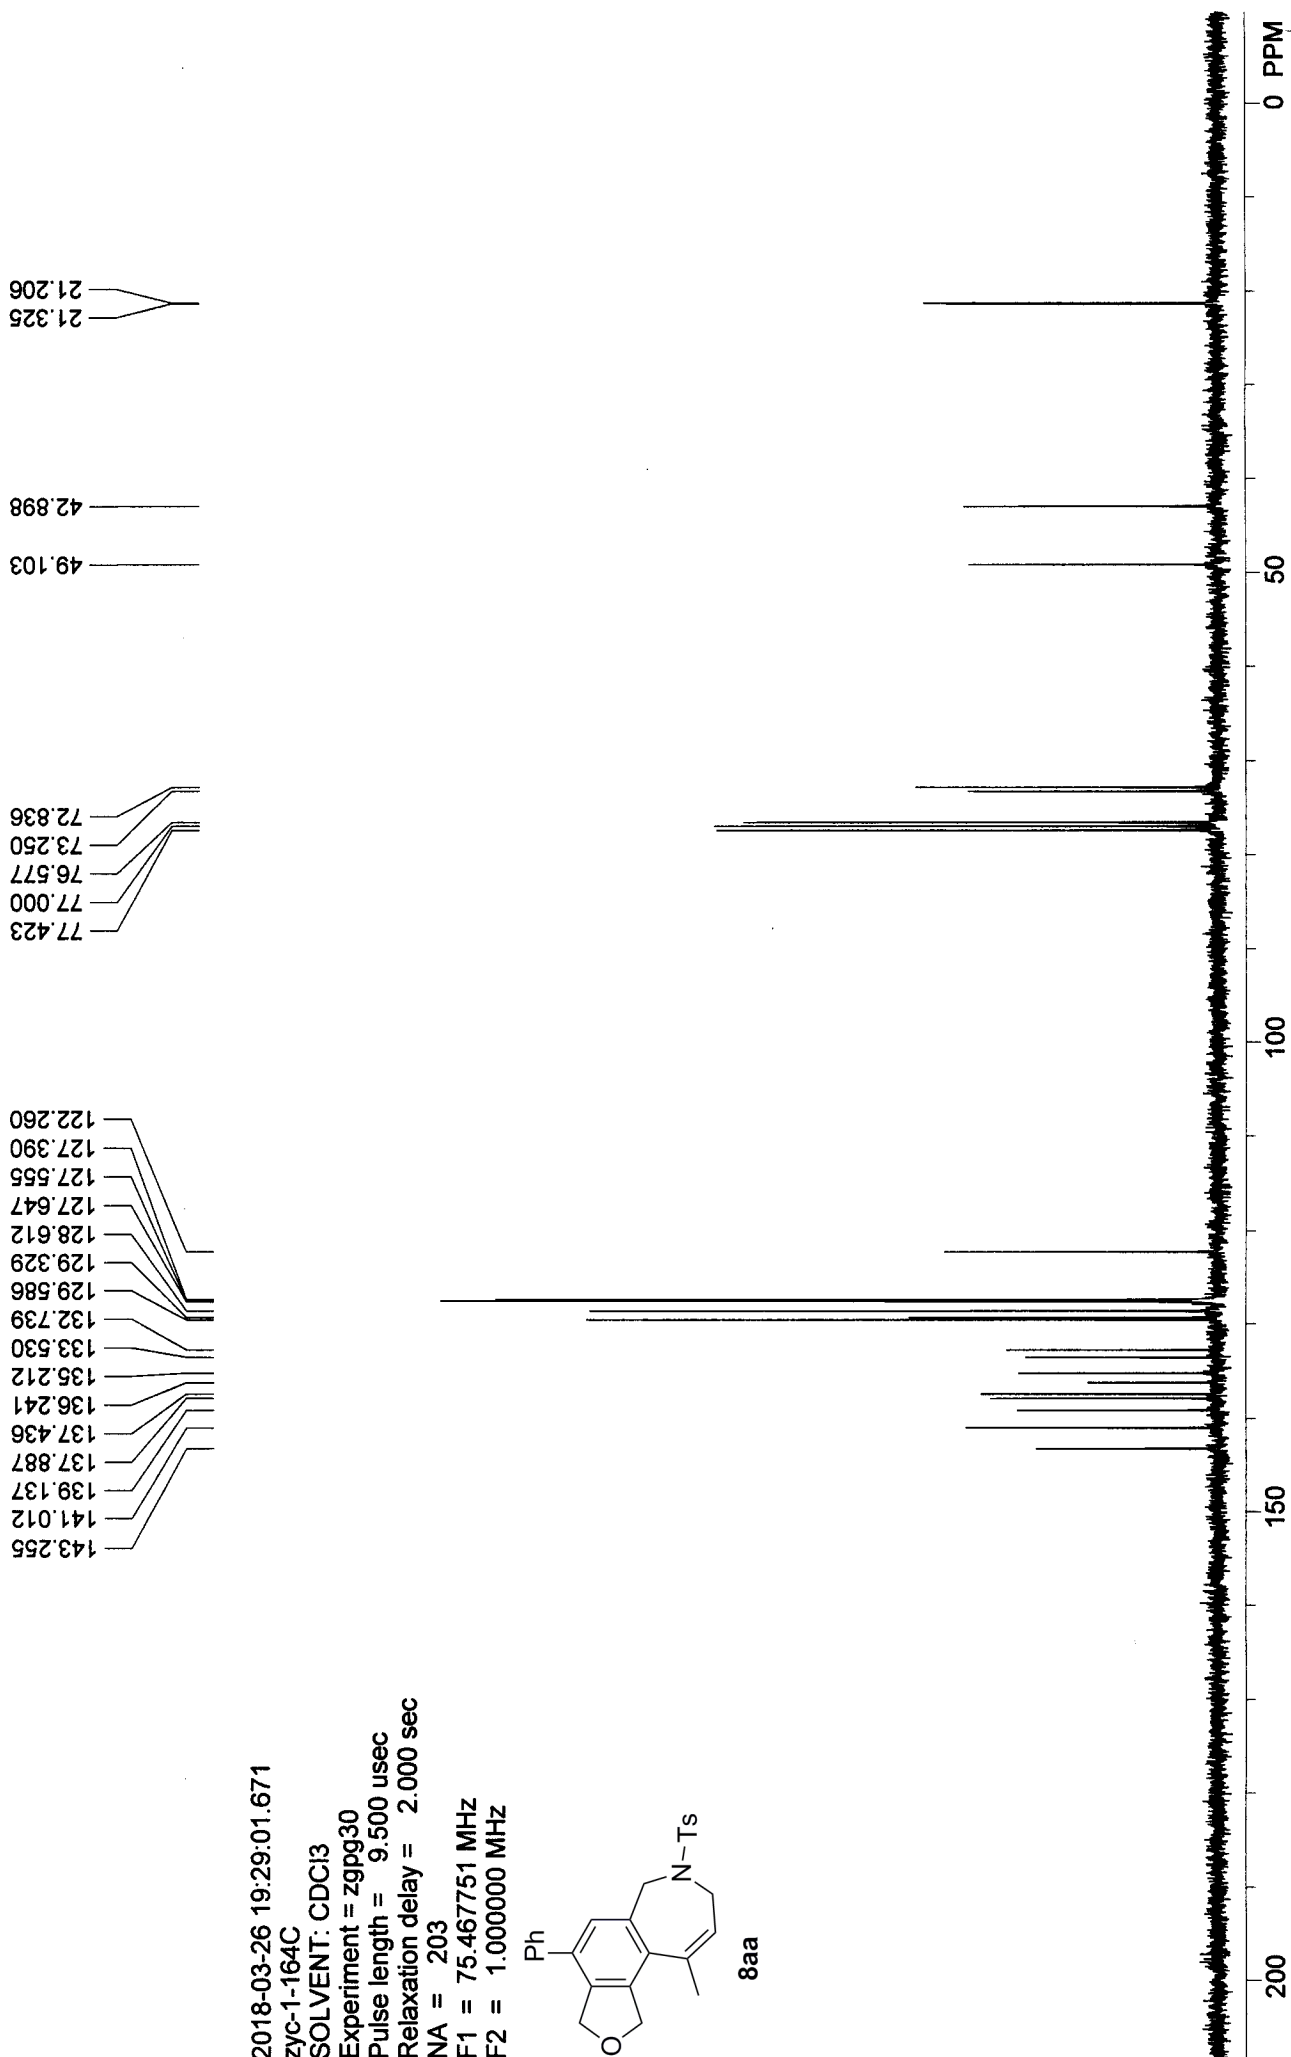

2016-03-26 16:39:23.843

wwt-3-51

SOLVENT: CDCl<sub>3</sub>

Experiment = zg30

Pulse length = 14.000 usec

Relaxation delay = 1.000 sec

NA = 8

F1 = 300.130005 MHz

F2 = 1.000000 MHz

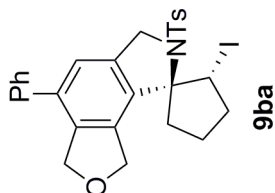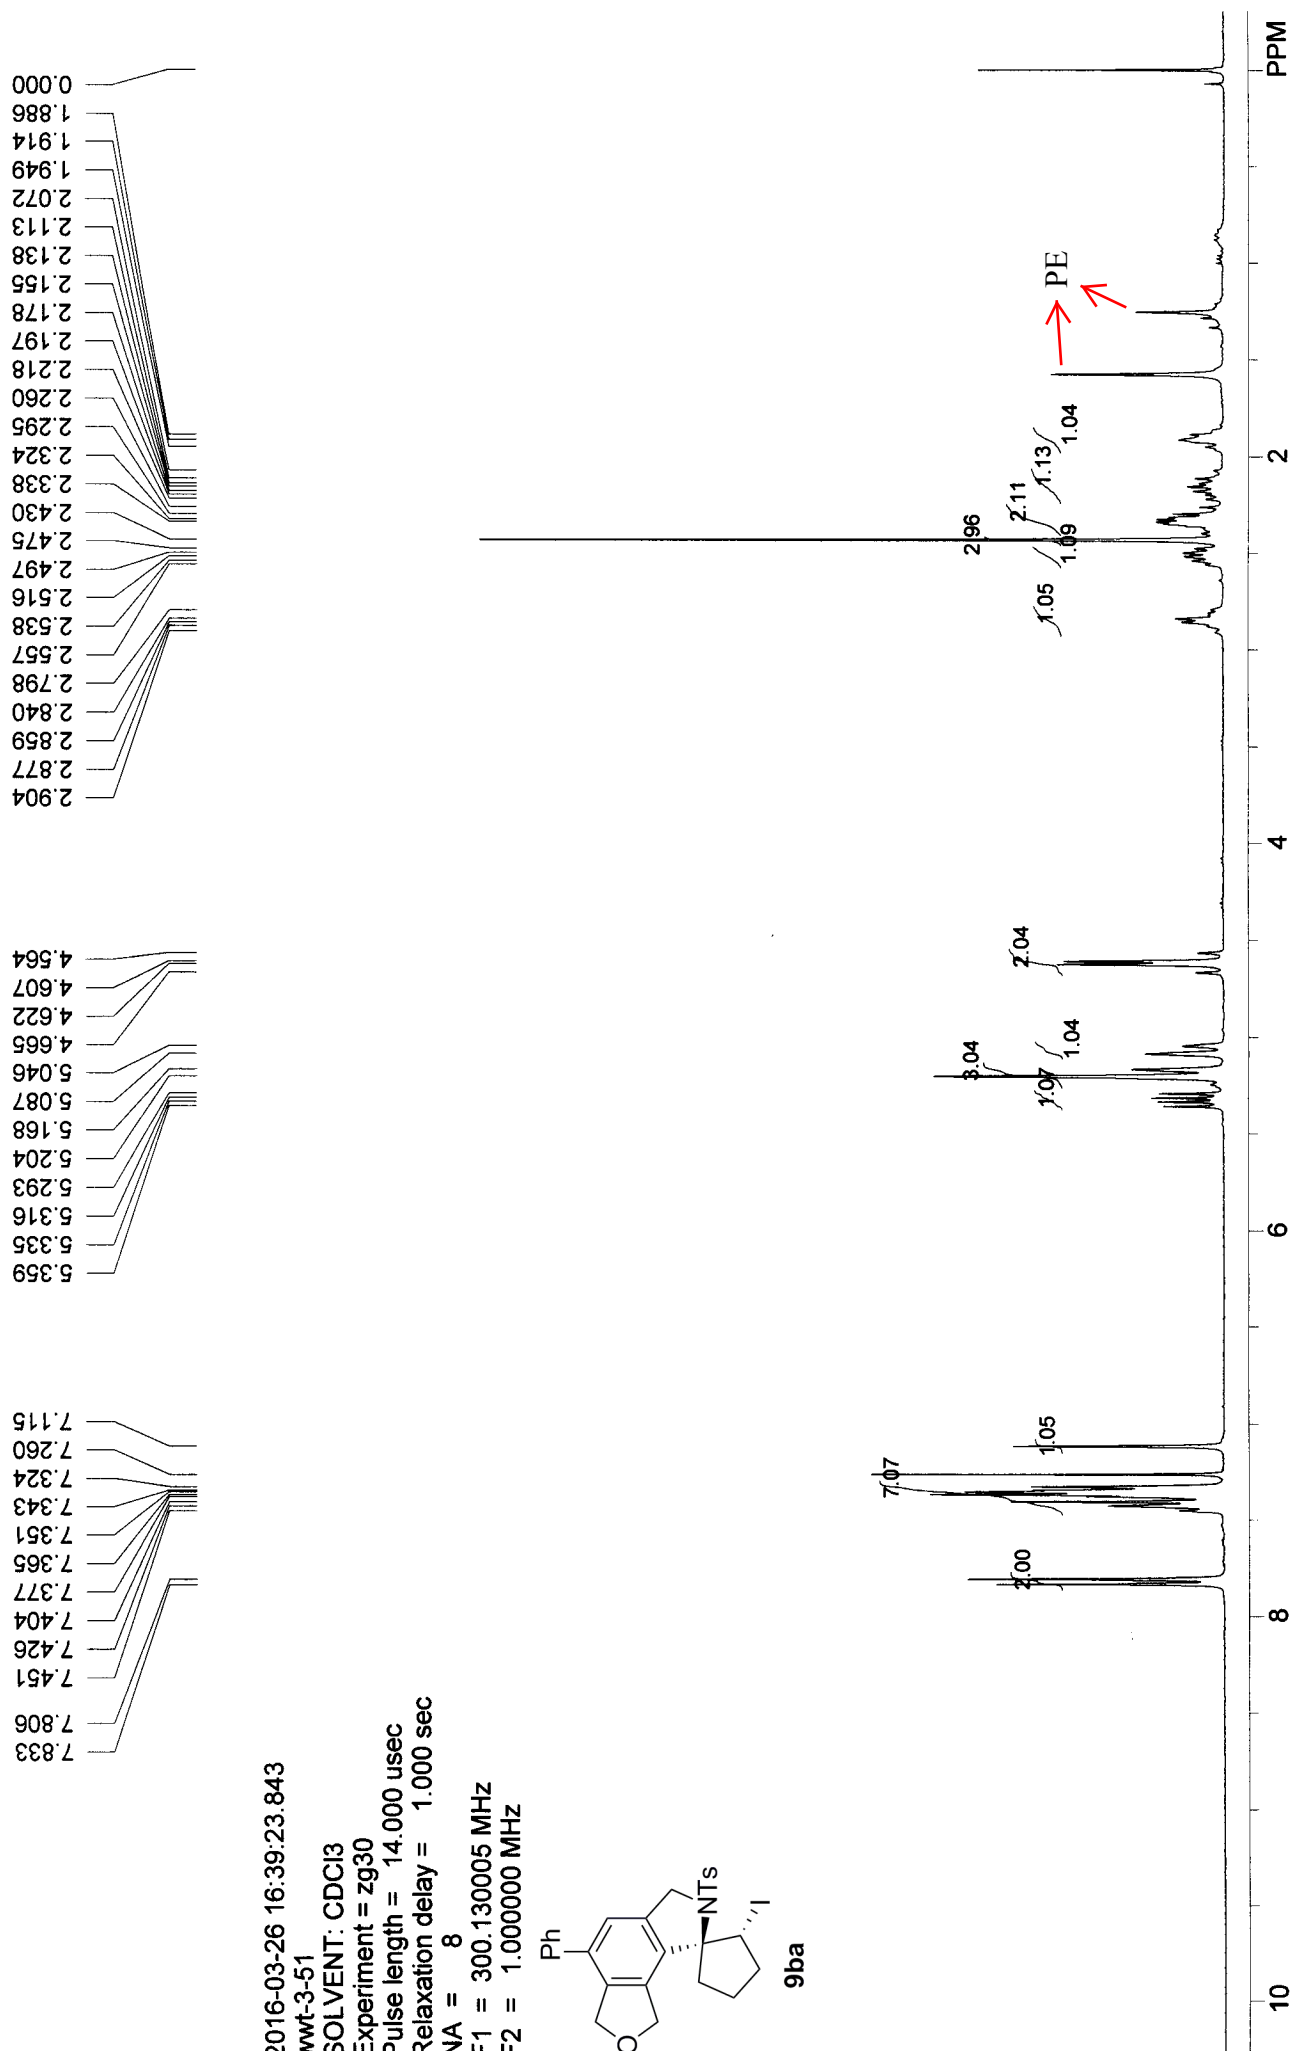

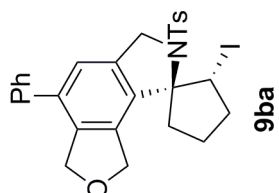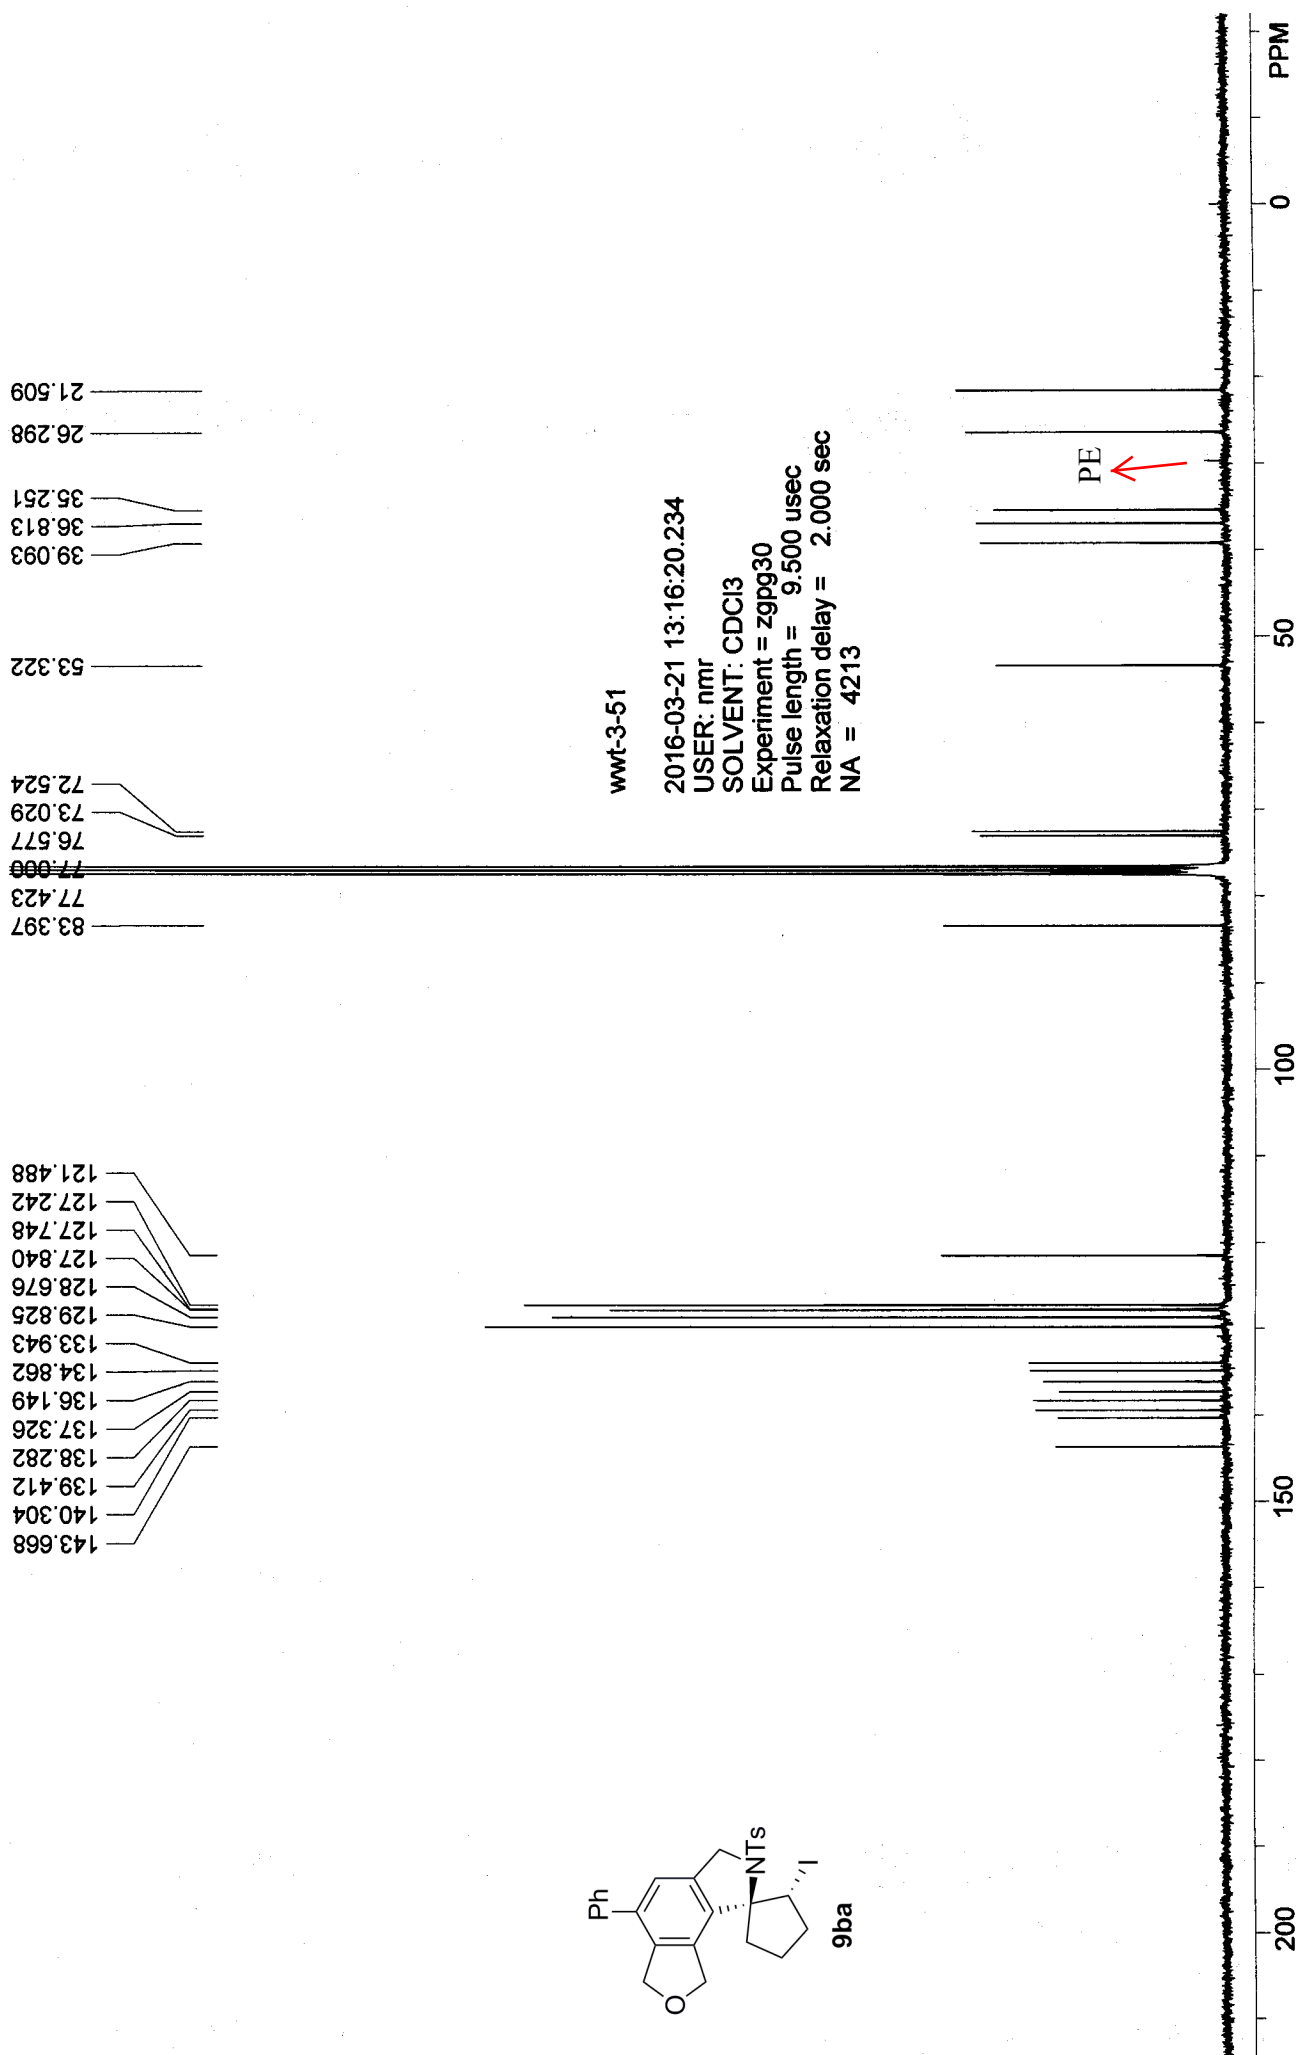

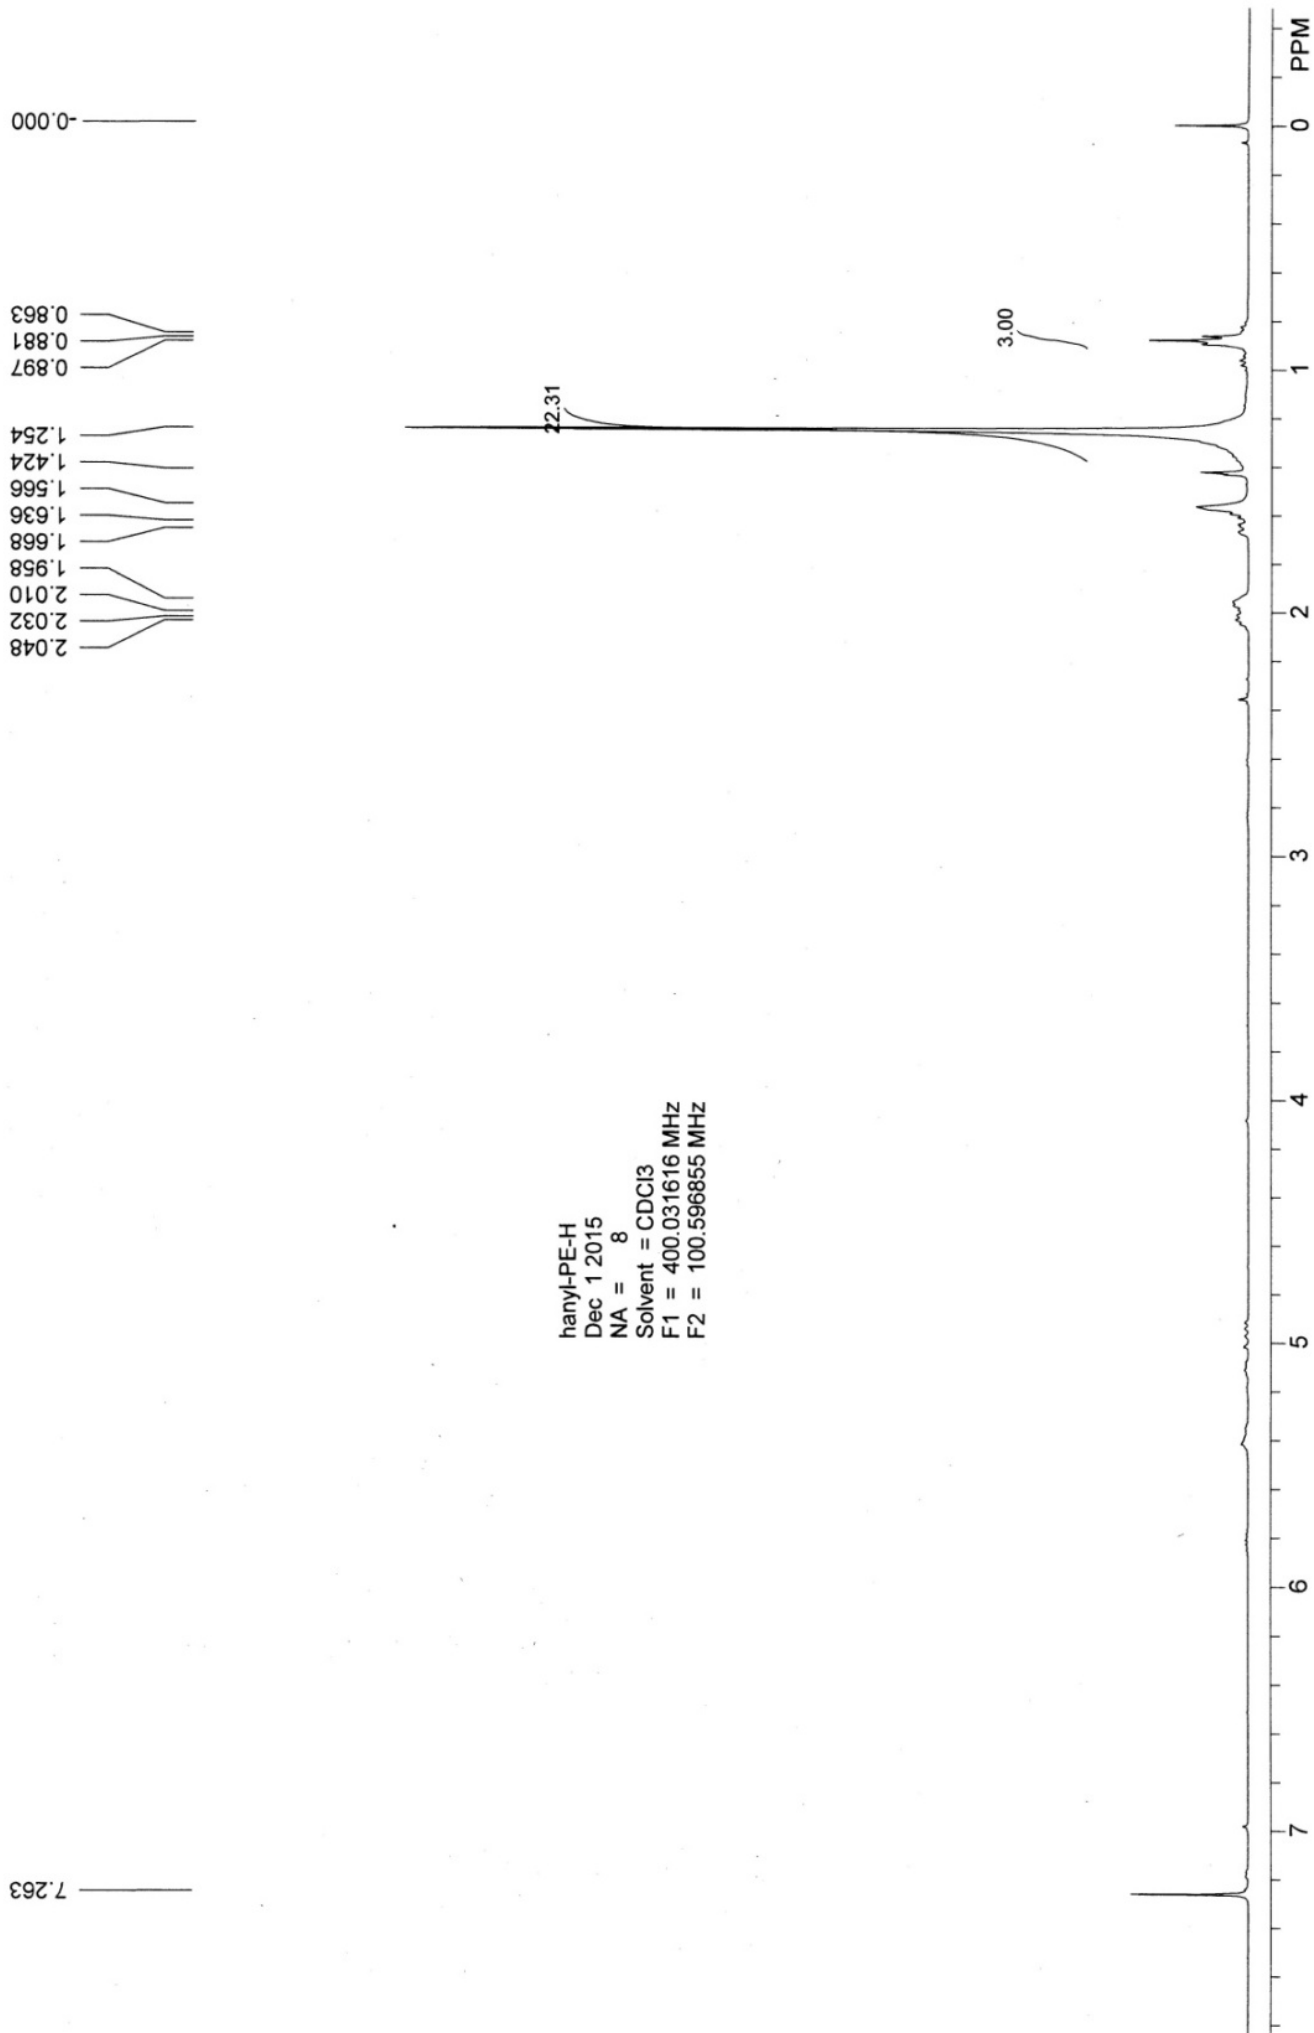

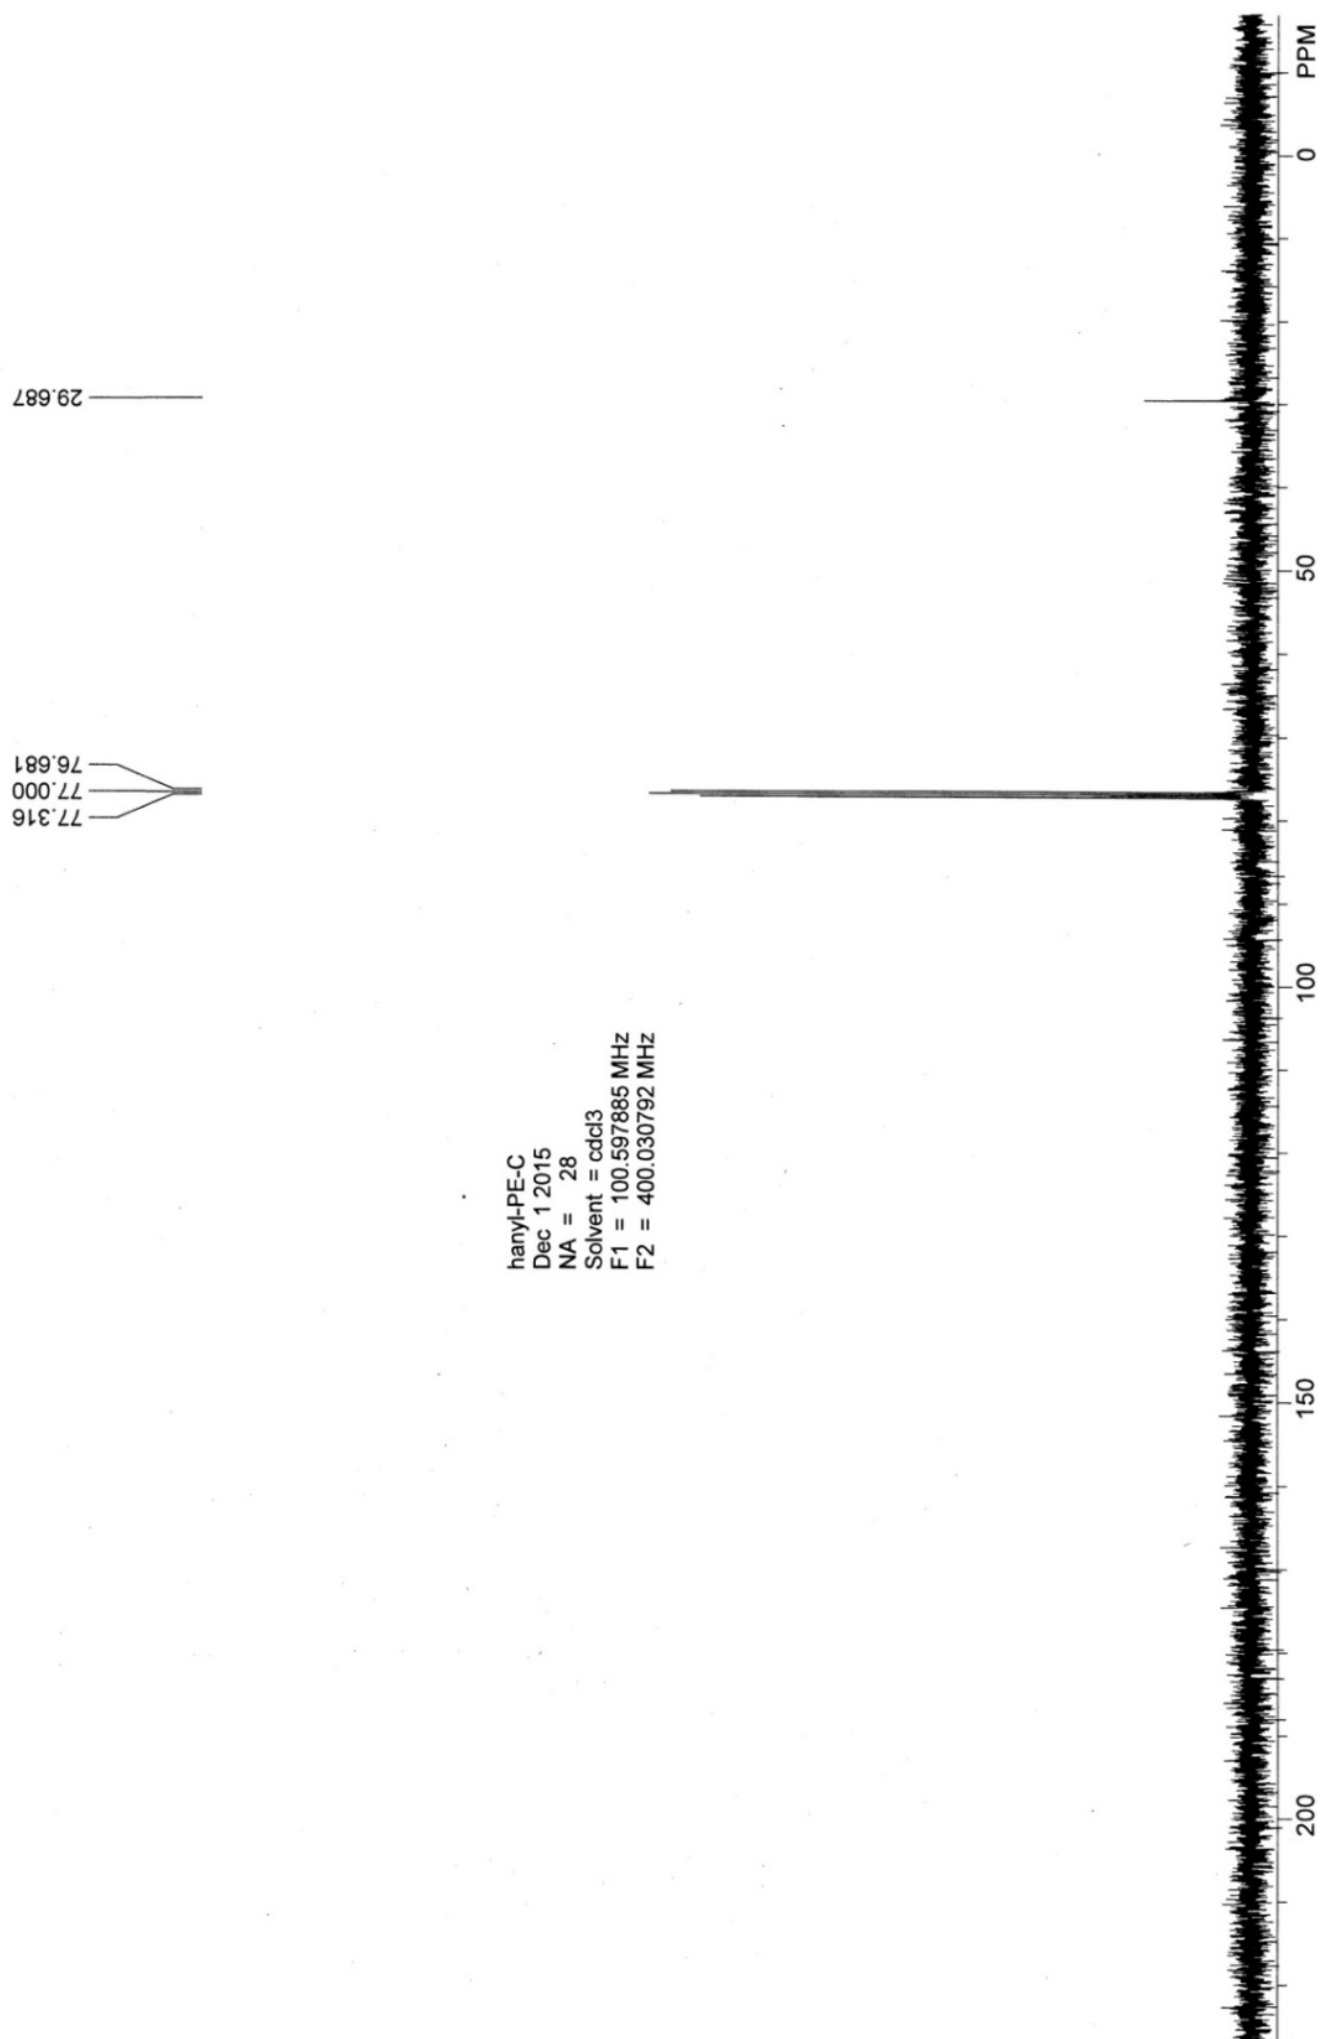

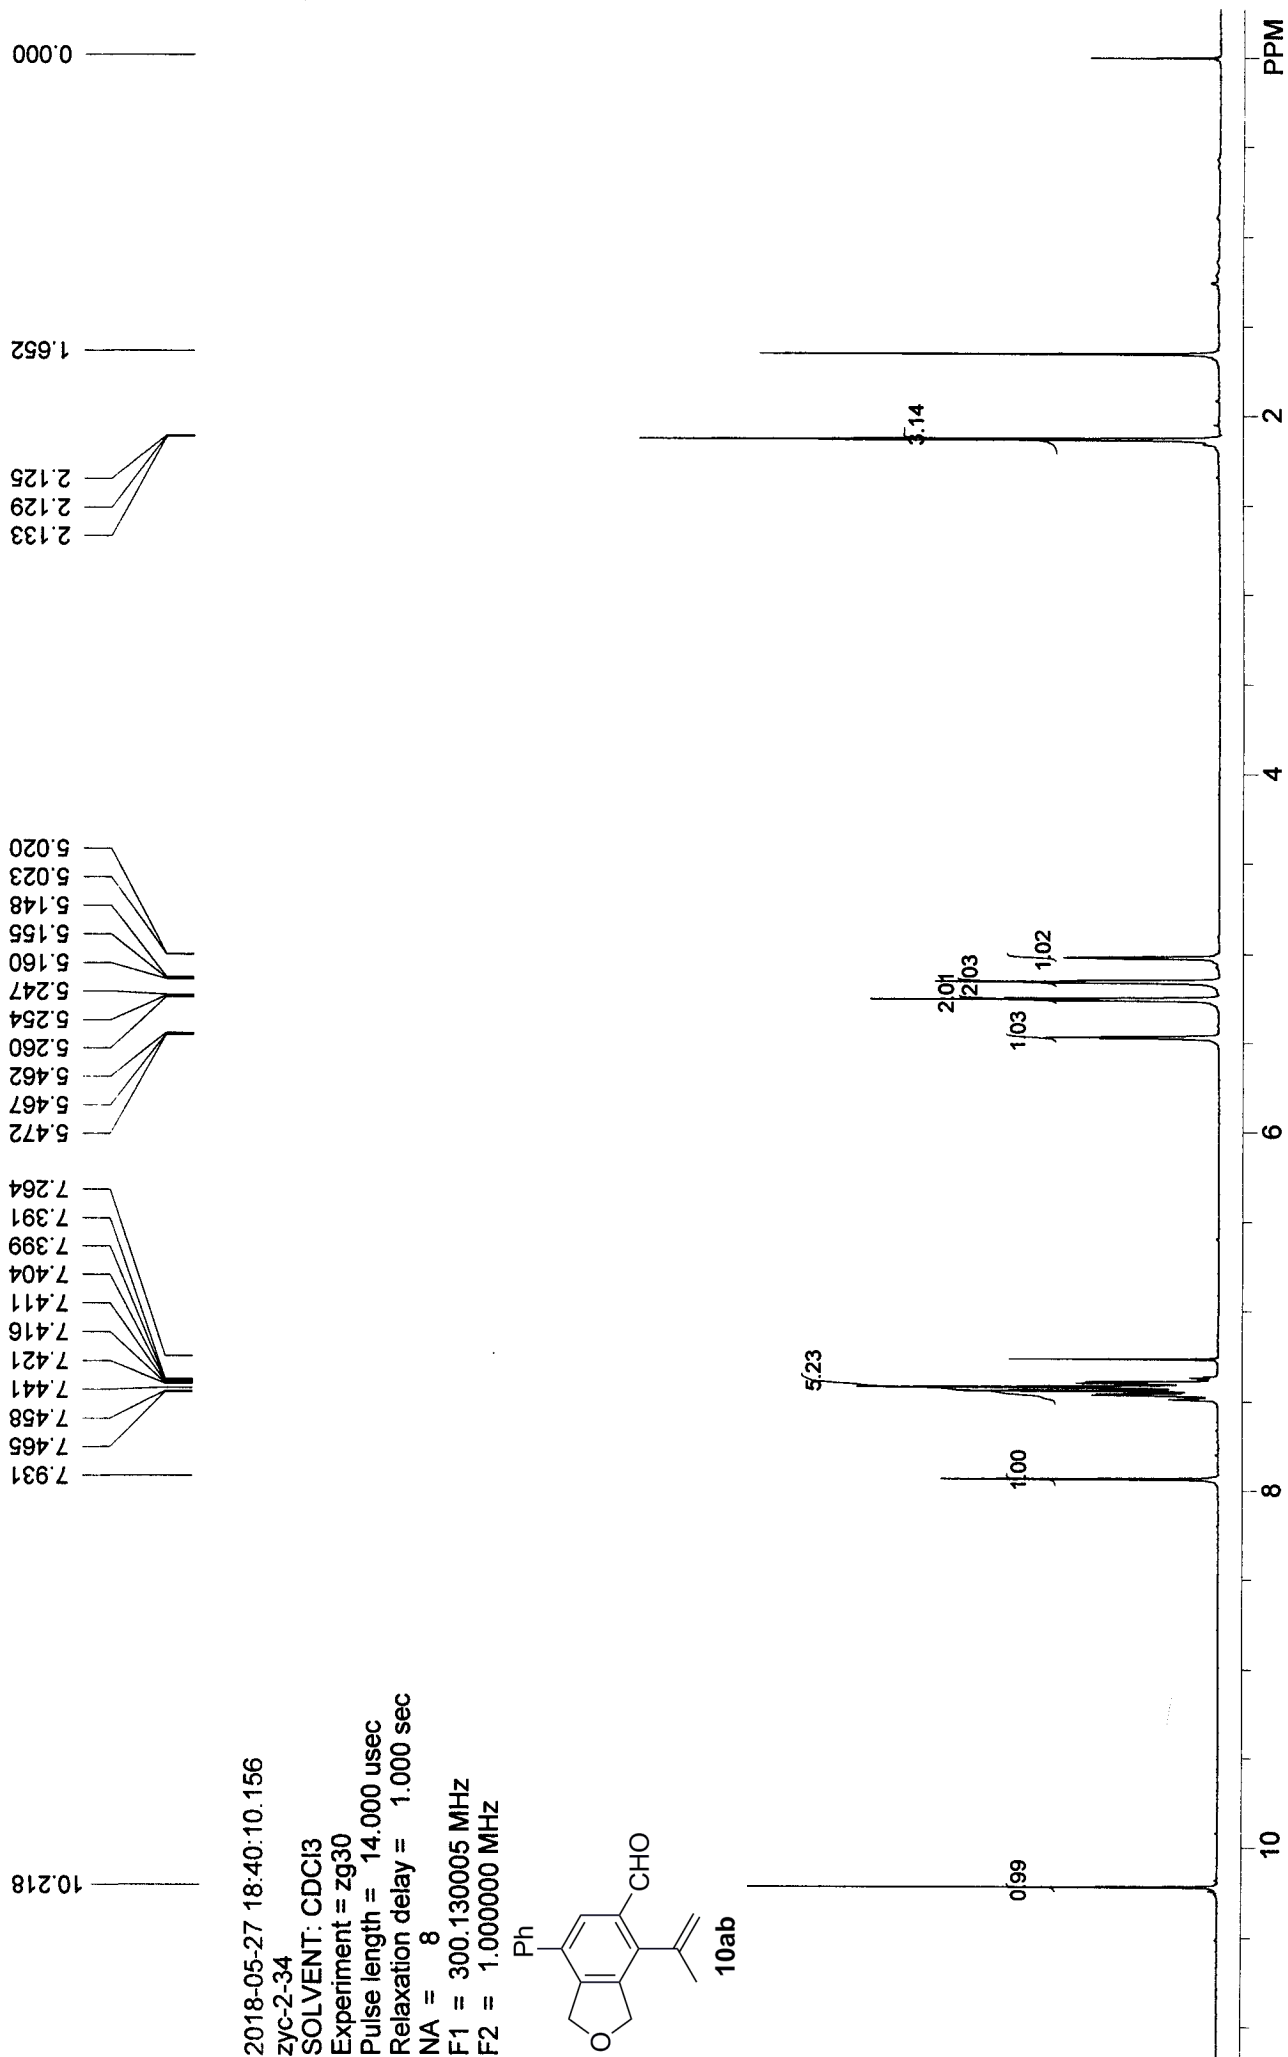

2018-05-27 15:56:49.765  
 zyc-2-34  
 SOLVENT: CDCl3  
 Experiment = zgpg30  
 Pulse length = 9.500 usec  
 Relaxation delay = 2.000 sec  
 NA = 51  
 F1 = 75.467751 MHz  
 F2 = 1.000000 MHz

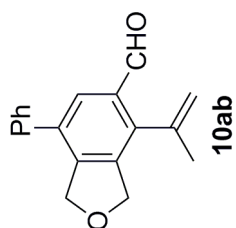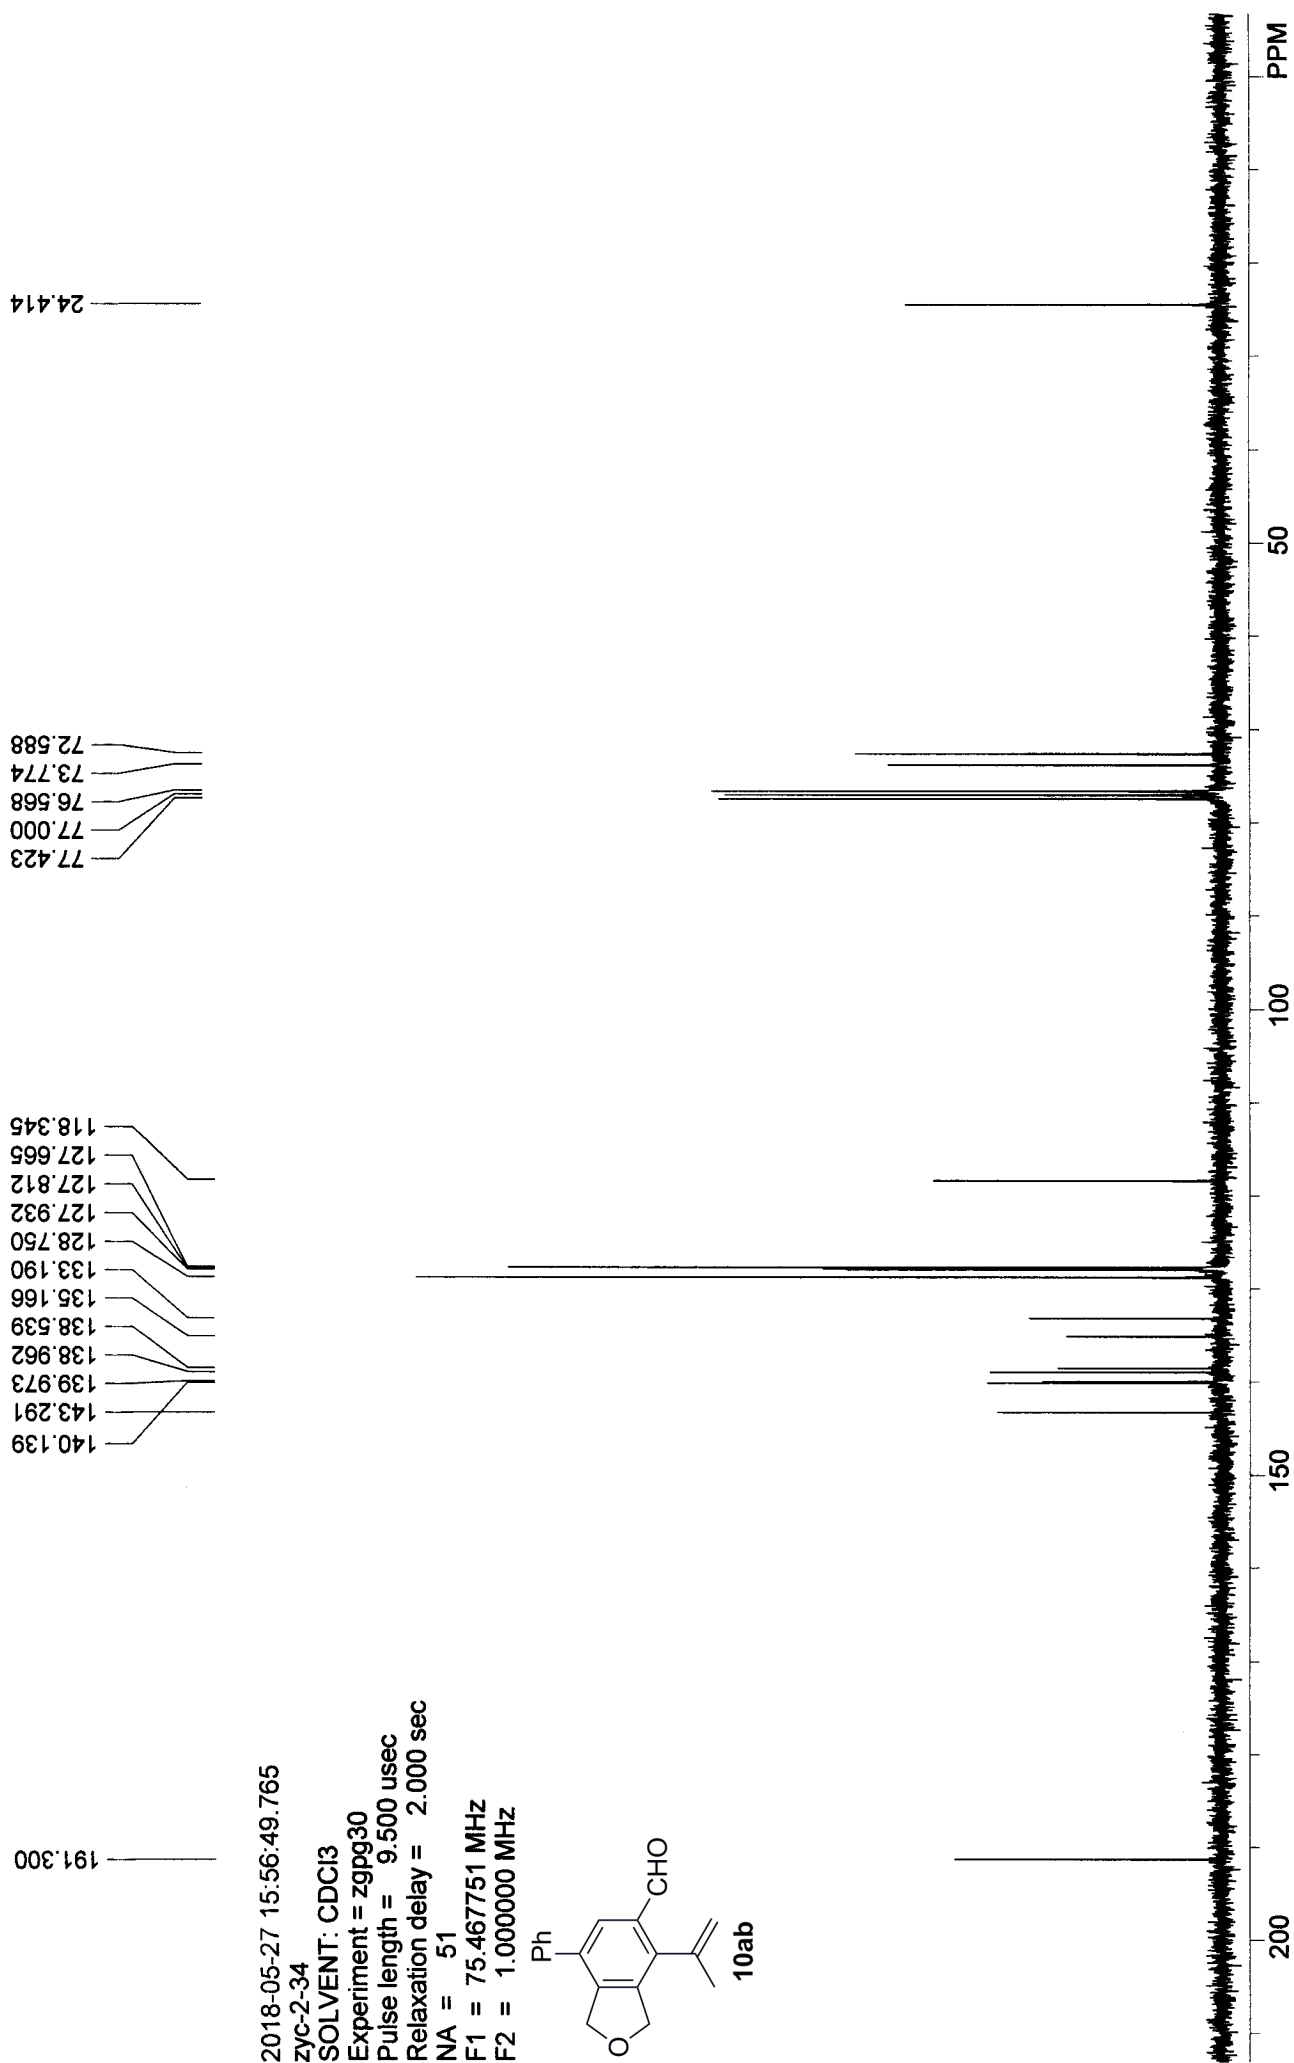

Supplement: c8sc04681f1.pdf [file c8sc04681f1.pdf]
